# Supplementary material for: Ficolin-2 Plasma Levels Assesses Liver Fibrosis in Non-Alcoholic Fatty Liver Disease
Source: Research Square preprint supplement (doi:10.21203/rs.3.rs-1250728/v1), 2022-01-25
Supplement: Supplementary file 1 [file 5eb774d88b975a5bebaaf6eb.xlsx]

## Sheet: Table 1
	Table 1: Classsification of all the human protein-coding genes used in the strategy.
	Tissue/cell	Category	Definition	Number of protein-coding genes	UniProtKB available data	References
	Normal Liver	Tissue enriched	At least fivefold higher mRNA levels in aparticular tissue as compared to all other tissues	135	135	Uhlén M. et.al. (8)
		Group enriched	At least fivefold higher mRNA levels in a group of tissues (2-7)	49	49
		Enhanced	At least fivefold higher mRNA levels in a particular tissue as compared to the average levels in all tissues	62	62
		Mixed	All genes showed in different groups by one of the databases	96	96
		Total elevated	Total number of tissue-enriched, group enriched, and tissue-enhanced genes	342	341
	Fibrotic Liver	Differentially expressed	Genes differentially expressed in fibrotic liver biopsies of a NAFLD cohort	1777	1721	Hotta K. et.al. (11)
	Myofibroblasts phenotype	Differentially expressed	Genes differentially expressed in human transdifferentiated myofibroblasts (htMyof)	59	59	Boers W. et.al. (12)
	PPI Myofibroblasts phenotype	Protein-Protein Interaction Network	PPI biologial network build by using 59 protein-coding genes differentially expressed in htMyof	1906	1879
	Table 1: The complete number of genes identified were mapped to their respective UniprotKb protein identifier. Category classification for Normal Liver was based on transcript expression level as described by Uhlén M. et. al [8].

## Sheet: Table 2
	Table 2: Additional categories of human protein-coding gene used in the strategy.
				Number of protein-coding genes
	Tissue/cell	Category	Definition	UniprotKB reviewed proteins
	All tissues	Predictive secretome	Genes classified as coding secreted proteins based on several signal peptide prediction methods	HPA	VerSeDa	MetazSecKB	Total unique proteins
				2869	651	1826	3240
	Plasma	Plasma proteome	List of plasma proteins	HPA	PeptideAtlas	PPD
				3736	3509	10729	11282
	All tissues	Housekeeping proteome	Genes detected in all tissues	HPA & GTEx
				7579			7579
	Table 2: The complete number of protein-coding genes identified for the categories listed were mapped to their respective UniprotKb protein identifier.

## Sheet: Table 3
	Genes Exclusively Expressed in Myofibroblasts
	Literature source: Boers W. et. al. JBC 281, 24, 16289-16295. DOI 10.1074/jbc.M600711200.
	Total unique protein-coding genes: 59 reviewed proteins
	Gene / Protein Name	Gene names	Relative expression (%)*	UniprotKB
	MMP1 matrix metalloproteinase 1 (interstitial collagenase)	MMP1 CLG	0.112	P03956
	IL6 interleukin 6	IL6 IFNB2	0.082	P05231
	TNFRSF11B tumor necrosis factor receptor superfamily, member 11b	TNFRSF11B OCIF OPG	0.082	O00300
	COL3A1 Collagen, type III, alpha 1	COL3A1	0.082	P02461
	PRKCH protein kinase C	PRKCH PKCL PRKCL	0.067	P24723
	MYH9 myosin, heavy polypeptide 9, non-muscle	MYH9	0.052	P35579
	COL6A2 collagen, type VI, alpha 2 variant 2C2a	COL6A2	0.052	P12110
	IGFBP5 insulin-like growth factor binding protein 5	IGFBP5 IBP5	0.045	P24593
	TRA1 tumor rejection antigen (gp96) 1	HSP90B1 GRP94 TRA1	0.045	P14625
	RPL35 ribosomal protein L35	RPL35	0.045	P42766
	TFPI2 tissue factor pathway inhibitor 2	TFPI2	0.045	P48307
	C14orf100 chromosome 14 open reading frame 100	JKAMP C14orf100 JAMP CDA06 HSPC213 HSPC327	0.037	Q9P055
	CXCL1 chemokine (C-X-C motif) ligand 1	CXCL1 GRO GRO1 GROA MGSA SCYB1	0.037	P09341
	ENO1 enolase 1, (alpha)	ENO1 ENO1L1 MBPB1 MPB1	0.037	P06733
	VCAM1 vascular cell adhesion molecule 1	VCAM1	0.037	P19320
	LAMR1 laminin receptor 1 (67kD, ribosomal protein SA)	RPSA LAMBR LAMR1	0.037	P08865
	RPL10a ribosomal protein L10a	RPL10A NEDD6	0.037	P62906
	ITGB5 integrin, beta 5	ITGB5	0.037	P18084
	HMGA1 high mobility group AT-hook 1	HMGA1 HMGIY	0.037	P17096
	TIMP3 tissue inhibitor of metalloproteinase 3	TIMP3	0.037	P35625
	DAB2 disabled (Drosophila) homolog 2 (mitogen-responsive phosphoprotein)	DAB2 DOC2	0.037	P98082
	C1S complement component 1, s subcomponent	C1S	0.037	P09871
	C20orf149 chromosome 20 open reading frame 149	C20orf149, PPDPF	0.037	Q9H3Y8
	COL12A1 collagen, type XII, alpha 1	COL12A1 COL12A1L	0.03	Q99715
	EEF1G eukaryotic translation elongation factor 1 gamma	EEF1G EF1G PRO1608	0.03	P26641
	TPD52L2 tumor protein D52-like 2	TPD52L2	0.03	O43399
	HLA-C major histocompatibility complex, class I, C	HLA-C HLAC	0.03	P04222
	G3BP2 Ras-GTPase activating protein SH3 domain-binding protein 2	G3BP2 KIAA0660	0.03	Q9UN86
	RGMB RGM domain family, member B	RGMB	0.03	Q6NW40
	LITAF lipopolysaccharide-induced TNF factor	LITAF PIG7 SIMPLE	0.03	Q99732
	RRAS related RAS viral (r-ras) oncogene homolog	RRAS	0.03	P10301
	TGFB1I1 transforming growth factor beta 1 induced transcript 1	TGFB1I1 ARA55	0.03	O43294
	GNG12 guanine nucleotide binding protein (G protein), gamma 12	GNG12	0.03	Q9UBI6
	DCN decorin	DCN SLRR1B	0.03	P07585
	HIF1A Hypoxia-inducible factor 1, alpha	HIF1A BHLHE78 MOP1 PASD8	0.03	Q16665
	RPS17 Ribosomal protein S17	RPS17 RPS17L	0.022	P08708
	QSCN6 quiescin Q6	QSOX1 QSCN6 UNQ2520/PRO6013	0.022	O00391
	EGR1 early growth response 1	EGR1 KROX24 ZNF225	0.022	P18146
	PSMD1 proteasome (prosome, macropain) 26S subunit,	PSMD1	0.022	Q99460
	KPNA2 karyopherin alpha 2	KPNA2 RCH1 SRP1	0.022	P52292
	MMP3 matrix metalloproteinase 3	MMP3 STMY1	0.022	P08254
	COL6A3 collagen, type VI, alpha 3	COL6A3	0.022	P12111
	PLAU plasminogen activator, urokinase	PLAU	0.022	P00749
	Gene with high expression in the hepatic myofibroblasts
	GREM1 gremlin, cysteine knot superfamily, BMP antagonist	GREM1	0.21	O60565
	PKM2 pyruvate kinase, muscle	PKM2	0.15	P14618
	P4HB procollagen-proline-4-hydroxylase	P4HB	0.15	P07237
	IGFBP6 insulin-like growth factor binding protein 6	IGFBP6	0.127	P24592
	FST follistatin	FST	0.112	P19883
	CKAP4 cytoskeleton-associated protein 4	CKAP4	0.09	Q07065
	PRDX6 peroxiredoxin 6	PRDX6	0.082	P30041
	PTX3 pentaxin-related gene, rapidly induced by IL-1 beta	PTX3	0.06	P26022
	ACTN1 actinin, alpha 1	ACTN1	0.052	P12814
	COX6C cytochrome c oxidase subunit 6C	COX6C	0.045	P09669
	TPM1 tropomyosin 1 (alpha)	TPM1	0.045	P09493
	RPN2 ribophorin II	RPN2	0.037	P04844
	COL1A1 collagen, type I, alpha 1	COL1A1	0.037	P02452
	PCSK7 proprotein convertase subtilisin/kexin type 7	PCSK7	0.037	Q16549
	CHPF chondroitin polymerizing factor	CHPF	0.037	Q8IZ52
	RCN3 reticulocalbin 3, EF-hand calcium binding domain	RCN3	0.03	Q96D15
	*The relative expression levels are based on the number of tags per total unique tags (percentage relative to unique tags). JBC 281, 24, 16289-16295. DOI 10.1074/jbc.M600711200.
	UniProtKB reviewed/Total			59

## Sheet: Table 4
			Protein-protein interaction data related to myofibroblast phenotype
			Data source: Cytoscape (using PPI data from IMEx-complying databases)
			Total unique protein-coding genes: 1879 reviewed proteins
			PPI (nodes)	UniProt	UniProtKB
			P23284	P23284	P23284
			P04626	P04626	P04626
			P00533	P00533	P00533
			P19388	P19388	P19388
			P28702	P28702	P28702
			Q00987	Q00987	Q00987
			P04179	P04179	P04179
			P29692	P29692	P29692
			P24386	P24386	P24386
			Q6PKC3	Q6PKC3	Q6PKC3
			P53671	P53671	P53671
			P10398	P10398	P10398
			Q6ZRI6	Q6ZRI6	Q6ZRI6
			O60477-3	O60477-3	O60477-3
			Q96Q15	Q96Q15	Q96Q15
			B4E1G1	B4E1G1	B4E1G1
			P10909-5	P10909-5	P10909-5
			Q13438	Q13438	Q13438
			Q9UBV2	Q9UBV2	Q9UBV2
			Q9BXK1	Q9BXK1	Q9BXK1
			Q15125	Q15125	Q15125
			Q9NTG7	Q9NTG7	Q9NTG7
			Q9GZZ9	Q9GZZ9	Q9GZZ9
			Q96Q89	Q96Q89	Q96Q89
			P04062	P04062	P04062
			Q9NYU2	Q9NYU2	Q9NYU2
			Q6PCD5	Q6PCD5	Q6PCD5
			O94905	O94905	O94905
			P11021	P11021	P11021
			Q92997	Q92997	Q92997
			P45983	P45983	P45983
			P42566	P42566	P42566
			Q9UM54	Q9UM54	Q9UM54
			Q96B97	Q96B97	Q96B97
			O75581	O75581	O75581
			P13569	P13569	P13569
			Q13042	Q13042	Q13042
			Q96H55	Q96H55	Q96H55
			Q9NQW6	Q9NQW6	Q9NQW6
			Q15691	Q15691	Q15691
			P61160	P61160	P61160
			P62140	P62140	P62140
			P46940	P46940	P46940
			Q16643	Q16643	Q16643
			P09497	P09497	P09497
			Q9NYZ3	Q9NYZ3	Q9NYZ3
			Q13492	Q13492	Q13492
			Q00610	Q00610	Q00610
			Q8N3V7	Q8N3V7	Q8N3V7
			Q9UHB6	Q9UHB6	Q9UHB6
			O14976	O14976	O14976
			P98066	P98066	P98066
			O00602	O00602	O00602
			Q15485	Q15485	Q15485
			P08603	P08603	P08603
			P27918	P27918	P27918
			O00602	O00602
			O75636	O75636	O75636
			P48039	P48039	P48039
			Q8NFD5	Q8NFD5	Q8NFD5
			P04075	P04075	P04075
			P41182	P41182	P41182
			Q05707	Q05707	Q05707
			P45973	P45973	P45973
			P17661	P17661	P17661
			Q14315	Q14315	Q14315
			Q8NEA6	Q8NEA6	Q8NEA6
			P52789	P52789	P52789
			Q9UBP5	Q9UBP5	Q9UBP5
			P05556	P05556	P05556
			P11142	P11142	P11142
			Q9Y6Y0	Q9Y6Y0	Q9Y6Y0
			Q496Y0	Q496Y0	Q496Y0
			Q9Y2K7	Q9Y2K7	Q9Y2K7
			Q9UHV7	Q9UHV7	Q9UHV7
			O75376	O75376	O75376
			Q16537	Q16537	Q16537
			Q8N7H5	Q8N7H5	Q8N7H5
			Q01105	Q01105	Q01105
			P28347	P28347	P28347
			Q92966	Q92966	Q92966
			Q8NCP5	Q8NCP5	Q8NCP5
			P0DI81	P0DI81	P0DI81
			Q13326	Q13326	Q13326
			O15273	O15273	O15273
			O96017	O96017	O96017
			O14503	O14503	O14503
			Q5VU43-11	Q5VU43-11	Q5VU43-11
			P19838	P19838	P19838
			Q99816	Q99816	Q99816
			Q9GZQ8	Q9GZQ8	Q9GZQ8
			Q13099	Q13099	Q13099
			Q9UPW5	Q9UPW5	Q9UPW5
			Q9NZC7	Q9NZC7	Q9NZC7
			P46934	P46934	P46934
			Q9UMX0-2	Q9UMX0-2	Q9UMX0-2
			Q96HR9	Q96HR9	Q96HR9
			Q13137	Q13137	Q13137
			O14964	O14964	O14964
			Q96CV9-2	Q96CV9-2	Q96CV9-2
			P21964	P21964	P21964
			Q75LH2	Q75LH2	Q75LH2
			P13929	P13929	P13929
			Q9UBE8	Q9UBE8	Q9UBE8
			P53355	P53355	P53355
			Q96QB1	Q96QB1	Q96QB1
			Q01968	Q01968	Q01968
			Q9H4B6	Q9H4B6	Q9H4B6
			Q86X59	Q86X59	Q86X59
			Q8WWI1	Q8WWI1	Q8WWI1
			Q04206	Q04206	Q04206
			Q06710	Q06710	Q06710
			P20073	P20073	P20073
			P11802	P11802	P11802
			Q14451	Q14451	Q14451
			Q16637	Q16637	Q16637
			Q9UJ70	Q9UJ70	Q9UJ70
			P61224	P61224	P61224
			P18754	P18754	P18754
			O95059	O95059	O95059
			Q00536	Q00536	Q00536
			Q8TDR0	Q8TDR0	Q8TDR0
			Q13043	Q13043	Q13043
			Q3V6T2	Q3V6T2	Q3V6T2
			Q6RFH8	Q6RFH8	Q6RFH8
			O95897	O95897	O95897
			P16615	P16615	P16615
			P10636	P10636	P10636
			P10636-8	P10636-8	P10636-8
			Q03518	Q03518	Q03518
			Q96D03	Q96D03	Q96D03
			Q8NE01	Q8NE01	Q8NE01
			Q14990	Q14990	Q14990
			P09228	P09228	P09228
			Q9P121-3	Q9P121-3	Q9P121-3
			Q92692-2	Q92692-2	Q92692-2
			O94818-2	O94818-2	O94818-2
			P01137	P01137	P01137
			P28799	P28799	P28799
			Q8NEG0	Q8NEG0	Q8NEG0
			Q5T7P3	Q5T7P3	Q5T7P3
			Q5TA82	Q5TA82	Q5TA82
			Q9BYQ6	Q9BYQ6	Q9BYQ6
			Q5TA78	Q5TA78	Q5TA78
			Q52LG2	Q52LG2	Q52LG2
			Q9BYQ0	Q9BYQ0	Q9BYQ0
			Q63HM9	Q63HM9	Q63HM9
			P60328	P60328	P60328
			P13726	P13726	P13726
			Q13162	Q13162	Q13162
			P19784	P19784	P19784
			Q9UKF6	Q9UKF6	Q9UKF6
			P80188	P80188	P80188
			Q9UC07-2	Q9UC07-2	Q9UC07-2
			Q92797	Q92797	Q92797
			Q8TCT9	Q8TCT9	Q8TCT9
			Q96HE7	Q96HE7	Q96HE7
			Q86YB8	Q86YB8	Q86YB8
			O60308	O60308	O60308
			Q6UN15	Q6UN15	Q6UN15
			Q9Y5S9	Q9Y5S9	Q9Y5S9
			Q8TDX7	Q8TDX7	Q8TDX7
			Q9UBS9	Q9UBS9	Q9UBS9
			Q92611	Q92611	Q92611
			Q16204	Q16204	Q16204
			Q99689	Q99689	Q99689
			Q15942	Q15942	Q15942
			P35221	P35221	P35221
			Q9UQM7	Q9UQM7	Q9UQM7
			P18031	P18031	P18031
			O75604	O75604	O75604
			O95257	O95257	O95257
			Q9NPC6	Q9NPC6	Q9NPC6
			Q9NWQ9	Q9NWQ9	Q9NWQ9
			Q9NP98	Q9NP98	Q9NP98
			Q7L775	Q7L775	Q7L775
			Q8IY33	Q8IY33	Q8IY33
			Q8TBB1	Q8TBB1	Q8TBB1
			P05198	P05198	P05198
			Q9H987-2	Q9H987-2	Q9H987-2
			Q08043	Q08043	Q08043
			Q6ZUT1	Q6ZUT1	Q6ZUT1
			P15311	P15311	P15311
			P63172	P63172	P63172
			P00973-2	P00973-2	P00973-2
			O15265	O15265	O15265
			P32780	P32780	P32780
			Q8N2W9	Q8N2W9	Q8N2W9
			P25786	P25786	P25786
			P42677	P42677	P42677
			O00330	O00330	O00330
			Q14161	Q14161	Q14161
			Q9Y6R0	Q9Y6R0	Q9Y6R0
			Q9UH99	Q9UH99	Q9UH99
			B2R8Y4	B2R8Y4	B2R8Y4
			P00973	P00973	P00973
			Q8NA61	Q8NA61	Q8NA61
			Q8NC69	Q8NC69	Q8NC69
			P08567	P08567	P08567
			P49768	P49768	P49768
			Q4G112	Q4G112	Q4G112
			Q14160	Q14160	Q14160
			Q15599	Q15599	Q15599
			Q9NR12	Q9NR12	Q9NR12
			P49286	P49286	P49286
			Q99700	Q99700	Q99700
			P38432	P38432	P38432
			Q16595	Q16595	Q16595
			Q5VTD9	Q5VTD9	Q5VTD9
			Q13426	Q13426	Q13426
			P43364	P43364	P43364
			O15084	O15084	O15084
			Q96HF1	Q96HF1	Q96HF1
			Q8IUH5	Q8IUH5	Q8IUH5
			Q969Q1	Q969Q1	Q969Q1
			Q9HAU4	Q9HAU4	Q9HAU4
			Q9BYV6	Q9BYV6	Q9BYV6
			P24534	P24534	P24534
			Q00613	Q00613	Q00613
			Q16236	Q16236	Q16236
			O94889	O94889	O94889
			P31749	P31749	P31749
			O00193	O00193	O00193
			O75956	O75956	O75956
			P24522	P24522	P24522
			P49841	P49841	P49841
			Q8IZ13	Q8IZ13	Q8IZ13
			O43809	O43809	O43809
			O95989	O95989	O95989
			P0DPB3	P0DPB3	P0DPB3
			Q04695	Q04695	Q04695
			Q96RU7	Q96RU7	Q96RU7
			Q7L5D6	Q7L5D6	Q7L5D6
			Q9Y3C7	Q9Y3C7	Q9Y3C7
			Q13011	Q13011	Q13011
			P61956	P61956	P61956
			O94762	O94762	O94762
			P78417	P78417	P78417
			P30519	P30519	P30519
			P36578	P36578	P36578
			O14737	O14737	O14737
			O00231	O00231	O00231
			O15211	O15211	O15211
			Q9C0J8	Q9C0J8	Q9C0J8
			P84077	P84077	P84077
			Q9HC52	Q9HC52	Q9HC52
			Q96HD1	Q96HD1	Q96HD1
			O60832	O60832	O60832
			P39748	P39748	P39748
			Q8TC92	Q8TC92	Q8TC92
			Q6PJ22	Q6PJ22	Q6PJ22
			O43639	O43639	O43639
			P62857	P62857	P62857
			Q96EB6	Q96EB6	Q96EB6
			Q8WYK2	Q8WYK2	Q8WYK2
			Q9H444	Q9H444	Q9H444
			Q06265	Q06265	Q06265
			Q9UQL6	Q9UQL6	Q9UQL6
			Q9BUT9	Q9BUT9	Q9BUT9
			P53602	P53602	P53602
			O95376	O95376	O95376
			Q99832	Q99832	Q99832
			P60953	P60953	P60953
			Q96SN8	Q96SN8	Q96SN8
			P33240	P33240	P33240
			O43261	O43261	O43261
			P31942	P31942	P31942
			Q9BWC9	Q9BWC9	Q9BWC9
			P29074	P29074	P29074
			Q13332	Q13332	Q13332
			P21673	P21673	P21673
			P04350	P04350	P04350
			P17028	P17028	P17028
			P62316	P62316	P62316
			Q53FA7	Q53FA7	Q53FA7
			P20827	P20827	P20827
			Q6N063	Q6N063	Q6N063
			P55316	P55316	P55316
			Q8IYL3	Q8IYL3	Q8IYL3
			Q9BW27	Q9BW27	Q9BW27
			Q9H4M7	Q9H4M7	Q9H4M7
			Q96KR7-3	Q96KR7-3	Q96KR7-3
			Q9NPF8	Q9NPF8	Q9NPF8
			Q96EP1	Q96EP1	Q96EP1
			O43927	O43927	O43927
			Q12905	Q12905	Q12905
			Q8N4N7	Q8N4N7	Q8N4N7
			Q96D98	Q96D98	Q96D98
			Q92793	Q92793	Q92793
			P35227	P35227	P35227
			P40337	P40337	P40337
			P49407	P49407	P49407
			Q92769	Q92769	Q92769
			Q71F56	Q71F56	Q71F56
			P49336	P49336	P49336
			Q93074	Q93074	Q93074
			Q96RN5	Q96RN5	Q96RN5
			O60244	O60244	O60244
			Q9ULK4	Q9ULK4	Q9ULK4
			Q15370	Q15370	Q15370
			Q15369	Q15369	Q15369
			Q9H6Z9	Q9H6Z9	Q9H6Z9
			Q9GZT9	Q9GZT9	Q9GZT9
			Q96KS0	Q96KS0	Q96KS0
			O00257	O00257	O00257
			P40818	P40818	P40818
			P27540	P27540	P27540
			Q9Y3V2	Q9Y3V2	Q9Y3V2
			P68400	P68400	P68400
			Q13617	Q13617	Q13617
			P07900	P07900	P07900
			Q13438-2	Q13438-2	Q13438-2
			Q13438-1	Q13438-1	Q13438-1
			Q92831	Q92831	Q92831
			Q9BZW7	Q9BZW7	Q9BZW7
			P46937	P46937	P46937
			P17861	P17861	P17861
			Q9NWT6	Q9NWT6	Q9NWT6
			Q9GZT9-1	Q9GZT9-1	Q9GZT9-1
			Q9C0J9	Q9C0J9	Q9C0J9
			P25789	P25789	P25789
			P15941	P15941	P15941
			P14618-1	P14618-1	P14618-1
			Q96CJ1	Q96CJ1	Q96CJ1
			P09467	P09467	P09467
			O43524	O43524	O43524
			P46531	P46531	P46531
			P11474	P11474	P11474
			Q9H4L4	Q9H4L4	Q9H4L4
			P55854	P55854	P55854
			O94888	O94888	O94888
			P55072	P55072	P55072
			Q96CS3	Q96CS3	Q96CS3
			P56524	P56524	P56524
			Q8N9N5	Q8N9N5	Q8N9N5
			Q5VSY0-2	Q5VSY0-2	Q5VSY0-2
			Q9UJV3-2	Q9UJV3-2	Q9UJV3-2
			Q99614	Q99614	Q99614
			Q9BZF9	Q9BZF9	Q9BZF9
			Q5XKP0	Q5XKP0	Q5XKP0
			O75925	O75925	O75925
			Q6ZS30	Q6ZS30	Q6ZS30
			P48681	P48681	P48681
			Q8IV50	Q8IV50	Q8IV50
			P02751-12	P02751-12	P02751-12
			P10109	P10109	P10109
			Q9HAU0-4	Q9HAU0-4	Q9HAU0-4
			Q96MN5	Q96MN5	Q96MN5
			P40337-3	P40337-3	P40337-3
			P27540-2	P27540-2	P27540-2
			Q9BYT8	Q9BYT8	Q9BYT8
			Q9BRU9	Q9BRU9	Q9BRU9
			Q5VT06	Q5VT06	Q5VT06
			Q8WYQ5	Q8WYQ5	Q8WYQ5
			Q9NRR4	Q9NRR4	Q9NRR4
			Q13330	Q13330	Q13330
			Q13547	Q13547	Q13547
			O60224	O60224	O60224
			Q9UHD8-1	Q9UHD8-1	Q9UHD8-1
			Q96SB4	Q96SB4	Q96SB4
			Q68CJ9	Q68CJ9	Q68CJ9
			Q09161	Q09161	Q09161
			P52298-1	P52298-1	P52298-1
			Q14974-1	Q14974-1	Q14974-1
			Q9UHL9	Q9UHL9	Q9UHL9
			P02545	P02545	P02545
			O15297	O15297	O15297
			Q14974	Q14974	Q14974
			P46527	P46527	P46527
			P05783	P05783	P05783
			P05787	P05787	P05787
			P49792	P49792	P49792
			P55268	P55268	P55268
			Q9UHY8	Q9UHY8	Q9UHY8
			Q13077	Q13077	Q13077
			Q9NSB8	Q9NSB8	Q9NSB8
			Q15020	Q15020	Q15020
			Q92844	Q92844	Q92844
			O43609	O43609	O43609
			Q8WV48	Q8WV48	Q8WV48
			O43707	O43707	O43707
			Q13561	Q13561	Q13561
			Q16891	Q16891	Q16891
			Q14149	Q14149	Q14149
			O15156	O15156	O15156
			Q9BX70	Q9BX70	Q9BX70
			Q9P2G1	Q9P2G1	Q9P2G1
			Q9BR76	Q9BR76	Q9BR76
			Q5D1E8	Q5D1E8	Q5D1E8
			Q96JB5	Q96JB5	Q96JB5
			Q96NA2	Q96NA2	Q96NA2
			Q9Y3Q8	Q9Y3Q8	Q9Y3Q8
			Q9NSK0	Q9NSK0	Q9NSK0
			Q8IY31	Q8IY31	Q8IY31
			P35638	P35638	P35638
			P02794	P02794	P02794
			P22102	P22102	P22102
			P07910	P07910	P07910
			Q15637	Q15637	Q15637
			Q96PV4	Q96PV4	Q96PV4
			Q9BYV2	Q9BYV2	Q9BYV2
			Q9UKX7	Q9UKX7	Q9UKX7
			Q7Z6G3-2	Q7Z6G3-2	Q7Z6G3-2
			O75478	O75478	O75478
			P63010	P63010	P63010
			Q53SE7	Q53SE7	Q53SE7
			Q6A162	Q6A162	Q6A162
			Q86Y26	Q86Y26	Q86Y26
			Q8IX15-3	Q8IX15-3	Q8IX15-3
			Q8N6Y0	Q8N6Y0	Q8N6Y0
			Q8NBZ0	Q8NBZ0	Q8NBZ0
			Q93062	Q93062	Q93062
			Q9BRK4	Q9BRK4	Q9BRK4
			Q9HAN9	Q9HAN9	Q9HAN9
			Q9NP66	Q9NP66	Q9NP66
			Q9UJW9	Q9UJW9	Q9UJW9
			Q9Y5V3	Q9Y5V3	Q9Y5V3
			Q96C86	Q96C86	Q96C86
			Q9UBU8-2	Q9UBU8-2	Q9UBU8-2
			O43148	O43148	O43148
			Q8IVT5	Q8IVT5	Q8IVT5
			Q8NHL6	Q8NHL6	Q8NHL6
			Q8N423	Q8N423	Q8N423
			O94776	O94776	O94776
			Q16576	Q16576	Q16576
			Q4G0J3	Q4G0J3	Q4G0J3
			P49790	P49790	P49790
			Q92845	Q92845	Q92845
			P52298	P52298	P52298
			O95696-1	O95696-1	O95696-1
			P55060	P55060	P55060
			P62826	P62826	P62826
			O94763	O94763	O94763
			Q9BZL6	Q9BZL6	Q9BZL6
			P29353	P29353	P29353
			Q8TF42	Q8TF42	Q8TF42
			O00255-2	O00255-2	O00255-2
			O00255	O00255	O00255
			P19338	P19338	P19338
			Q13464	Q13464	Q13464
			P26447	P26447	P26447
			Q15051	Q15051	Q15051
			Q7Z3C6	Q7Z3C6	Q7Z3C6
			Q9H4A3	Q9H4A3	Q9H4A3
			P67775	P67775	P67775
			Q92905	Q92905	Q92905
			O94782	O94782	O94782
			Q70EL2	Q70EL2	Q70EL2
			P49662	P49662	P49662
			P60033	P60033	P60033
			P78524	P78524	P78524
			Q53TN4	Q53TN4	Q53TN4
			Q6P4F7	Q6P4F7	Q6P4F7
			Q9Y592	Q9Y592	Q9Y592
			P21333-2	P21333-2	P21333-2
			P67936	P67936	P67936
			Q9H6Q4	Q9H6Q4	Q9H6Q4
			Q9UPQ0	Q9UPQ0	Q9UPQ0
			Q0ZGT2-4	Q0ZGT2-4	Q0ZGT2-4
			Q8WWI1-3	Q8WWI1-3	Q8WWI1-3
			Q7Z6Z7-2	Q7Z6Z7-2	Q7Z6Z7-2
			P19105	P19105	P19105
			Q9BPX5	Q9BPX5	Q9BPX5
			P06753-2	P06753-2	P06753-2
			Q15149-4	Q15149-4	Q15149-4
			Q8WX93-3	Q8WX93-3	Q8WX93-3
			O15144	O15144	O15144
			O00159-3	O00159-3	O00159-3
			P60660	P60660	P60660
			Q01082	Q01082	Q01082
			P28289	P28289	P28289
			P47756-2	P47756-2	P47756-2
			P68032	P68032	P68032
			Q9UKS6	Q9UKS6	Q9UKS6
			O75083	O75083	O75083
			Q12965	Q12965	Q12965
			O14639	O14639	O14639
			Q76I76	Q76I76	Q76I76
			Q12792	Q12792	Q12792
			O95425	O95425	O95425
			Q9NYL9	Q9NYL9	Q9NYL9
			P07951-2	P07951-2	P07951-2
			J3QRU1	J3QRU1	J3QRU1
			P23528	P23528	P23528
			Q13045	Q13045	Q13045
			O75128	O75128	O75128
			O94875	O94875	O94875
			Q09666	Q09666	Q09666
			O15145	O15145	O15145
			Q8IVT2	Q8IVT2	Q8IVT2
			Q9H3U1-2	Q9H3U1-2	Q9H3U1-2
			P62879	P62879	P62879
			Q9P0K7-3	Q9P0K7-3	Q9P0K7-3
			Q14126	Q14126	Q14126
			O14974	O14974	O14974
			Q01082-3	Q01082-3	Q01082-3
			O60292	O60292	O60292
			Q4KMQ1	Q4KMQ1	Q4KMQ1
			Q5M775	Q5M775	Q5M775
			P07948	P07948	P07948
			H3BN98	H3BN98	H3BN98
			Q05682-5	Q05682-5	Q05682-5
			Q9Y4I1-2	Q9Y4I1-2	Q9Y4I1-2
			P04899	P04899	P04899
			P28290	P28290	P28290
			Q8N556	Q8N556	Q8N556
			P48449	P48449	P48449
			Q86V48	Q86V48	Q86V48
			Q8N3V7-2	Q8N3V7-2	Q8N3V7-2
			P63092	P63092	P63092
			O60237	O60237	O60237
			B4E3T4	B4E3T4	B4E3T4
			Q00610-2	Q00610-2	Q00610-2
			P80723	P80723	P80723
			Q6WCQ1-2	Q6WCQ1-2	Q6WCQ1-2
			Q9HC78-2	Q9HC78-2	Q9HC78-2
			Q9UHB6-4	Q9UHB6-4	Q9UHB6-4
			Q5T5U3	Q5T5U3	Q5T5U3
			H7BYY1	H7BYY1	H7BYY1
			Q14573	Q14573	Q14573
			Q69YQ0	Q69YQ0	Q69YQ0
			P14649	P14649	P14649
			Q155Q3	Q155Q3	Q155Q3
			Q13813	Q13813	Q13813
			P40306	P40306	P40306
			Q16891-2	Q16891-2	Q16891-2
			P27482	P27482	P27482
			Q9NQX4	Q9NQX4	Q9NQX4
			Q27J81	Q27J81	Q27J81
			Q8IVM0	Q8IVM0	Q8IVM0
			B4E2V5	B4E2V5	B4E2V5
			Q9ULV0	Q9ULV0	Q9ULV0
			P09496-2	P09496-2	P09496-2
			O43795	O43795	O43795
			P63261	P63261	P63261
			A1L390	A1L390	A1L390
			Q9ULV4	Q9ULV4	Q9ULV4
			Q92614-4	Q92614-4	Q92614-4
			P16070-18	P16070-18	P16070-18
			Q96SB3	Q96SB3	Q96SB3
			P59998	P59998	P59998
			Q99755-4	Q99755-4	Q99755-4
			Q15149	Q15149	Q15149
			P14384	P14384	P14384
			Q8NFJ5	Q8NFJ5	Q8NFJ5
			Q9NYA1-1	Q9NYA1-1	Q9NYA1-1
			Q9H9G7	Q9H9G7	Q9H9G7
			Q96QT4	Q96QT4	Q96QT4
			Q9BX84	Q9BX84	Q9BX84
			Q14457	Q14457	Q14457
			Q9P0K7	Q9P0K7	Q9P0K7
			O43795-2	O43795-2	O43795-2
			Q13829	Q13829	Q13829
			Q14677	Q14677	Q14677
			O43293	O43293	O43293
			Q9H7H0-2	Q9H7H0-2	Q9H7H0-2
			Q9Y608-4	Q9Y608-4	Q9Y608-4
			Q14247	Q14247	Q14247
			Q96FS4	Q96FS4	Q96FS4
			Q92828	Q92828	Q92828
			O75146	O75146	O75146
			Q9Y281	Q9Y281	Q9Y281
			O15143	O15143	O15143
			Q9Y2D5	Q9Y2D5	Q9Y2D5
			F8W118	F8W118	F8W118
			Q27J81-2	Q27J81-2	Q27J81-2
			P50542	P50542	P50542
			P52907	P52907	P52907
			P07951	P07951	P07951
			Q13813-2	Q13813-2	Q13813-2
			Q6IBS0	Q6IBS0	Q6IBS0
			Q7RTP6	Q7RTP6	Q7RTP6
			Q9H3R2	Q9H3R2	Q9H3R2
			P61158	P61158	P61158
			Q8TF72	Q8TF72	Q8TF72
			Q96CW1-2	Q96CW1-2	Q96CW1-2
			Q5M775-4	Q5M775-4	Q5M775-4
			Q9UM54-6	Q9UM54-6	Q9UM54-6
			G3V1N3	G3V1N3	G3V1N3
			Q14677-3	Q14677-3	Q14677-3
			J3KNL6	J3KNL6	J3KNL6
			O00443	O00443	O00443
			Q0JRZ9	Q0JRZ9	Q0JRZ9
			O95425-2	O95425-2	O95425-2
			P09497-2	P09497-2	P09497-2
			H0Y2S9	H0Y2S9	H0Y2S9
			Q562R1	Q562R1	Q562R1
			Q9H6X2	Q9H6X2	Q9H6X2
			O95782-2	O95782-2	O95782-2
			P60981	P60981	P60981
			P06753	P06753	P06753
			Q96A19	Q96A19	Q96A19
			Q9NSY1	Q9NSY1	Q9NSY1
			P09493-4	P09493-4	P09493-4
			P06396-2	P06396-2	P06396-2
			Q13492-3	Q13492-3	Q13492-3
			Q8WXE9	Q8WXE9	Q8WXE9
			Q8N9B5-2	Q8N9B5-2	Q8N9B5-2
			Q9H410	Q9H410	Q9H410
			P63096	P63096	P63096
			Q03001-8	Q03001-8	Q03001-8
			Q96PE2	Q96PE2	Q96PE2
			C9JNE2	C9JNE2	C9JNE2
			Q6YHK3	Q6YHK3	Q6YHK3
			Q96IZ0	Q96IZ0	Q96IZ0
			F5GWP8	F5GWP8	F5GWP8
			H0YEF7	H0YEF7	H0YEF7
			Q6PJG2	Q6PJG2	Q6PJG2
			Q96N67-4	Q96N67-4	Q96N67-4
			G3V5S9	G3V5S9	G3V5S9
			O75369-8	O75369-8	O75369-8
			O75955	O75955	O75955
			H0YDQ3	H0YDQ3	H0YDQ3
			O15020	O15020	O15020
			P62937	P62937	P62937
			P04114	P04114	P04114
			Q96K19-3	Q96K19-3	Q96K19-3
			Q15560	Q15560	Q15560
			Q9NQT8	Q9NQT8	Q9NQT8
			Q8TDG2	Q8TDG2	Q8TDG2
			Q9NQ11-3	Q9NQ11-3	Q9NQ11-3
			Q9H2D6-5	Q9H2D6-5	Q9H2D6-5
			P09382	P09382	P09382
			Q9BV73	Q9BV73	Q9BV73
			C9JIZ3	C9JIZ3	C9JIZ3
			Q86Y82	Q86Y82	Q86Y82
			P51572	P51572	P51572
			Q03001	Q03001	Q03001
			H3BPE1	H3BPE1	H3BPE1
			Q5TGY3	Q5TGY3	Q5TGY3
			Q96ST8-3	Q96ST8-3	Q96ST8-3
			Q15746-4	Q15746-4	Q15746-4
			Q7LBC6	Q7LBC6	Q7LBC6
			Q00796	Q00796	Q00796
			Q53HL2	Q53HL2	Q53HL2
			Q14571	Q14571	Q14571
			P35580	P35580	P35580
			Q8N841	Q8N841	Q8N841
			Q9BRZ2	Q9BRZ2	Q9BRZ2
			P36873-2	P36873-2	P36873-2
			Q9H967	Q9H967	Q9H967
			Q14651	Q14651	Q14651
			P26038	P26038	P26038
			Q5TB80	Q5TB80	Q5TB80
			P07355	P07355	P07355
			Q96C19	Q96C19	Q96C19
			K7ELC4	K7ELC4	K7ELC4
			Q9UL41-2	Q9UL41-2	Q9UL41-2
			Q13492-2	Q13492-2	Q13492-2
			P24941	P24941	P24941
			P24844	P24844	P24844
			Q06124	Q06124	Q06124
			P51692	P51692	P51692
			P50552	P50552	P50552
			Q86UX7	Q86UX7	Q86UX7
			P55769	P55769	P55769
			P21796	P21796	P21796
			P46776	P46776	P46776
			P28066	P28066	P28066
			P48444	P48444	P48444
			P47756	P47756	P47756
			Q96CW1	Q96CW1	Q96CW1
			P15880	P15880	P15880
			A6NHR9	A6NHR9	A6NHR9
			P61026	P61026	P61026
			P09661	P09661	P09661
			P62633	P62633	P62633
			P55884	P55884	P55884
			P46779	P46779	P46779
			P62318	P62318	P62318
			P54920	P54920	P54920
			Q92621	Q92621	Q92621
			Q9BZL1	Q9BZL1	Q9BZL1
			P07195	P07195	P07195
			Q9Y6I3	Q9Y6I3	Q9Y6I3
			P36776	P36776	P36776
			P39023	P39023	P39023
			O95782	O95782	O95782
			P11166	P11166	P11166
			Q9Y3F4	Q9Y3F4	Q9Y3F4
			P47897	P47897	P47897
			P50402	P50402	P50402
			O00410	O00410	O00410
			Q14839-2	Q14839-2	Q14839-2
			P16401	P16401	P16401
			P49721	P49721	P49721
			O76003	O76003	O76003
			P49591	P49591	P49591
			Q9Y3B4	Q9Y3B4	Q9Y3B4
			Q14839-1	Q14839-1	Q14839-1
			P08107	P08107	P08107
			P25705	P25705	P25705
			P46778	P46778	P46778
			Q06830	Q06830	Q06830
			Q9H0A0	Q9H0A0	Q9H0A0
			E9PB61	E9PB61	E9PB61
			P24752	P24752	P24752
			P60842	P60842	P60842
			Q86XP3	Q86XP3	Q86XP3
			P13645	P13645	P13645
			P48643	P48643	P48643
			P60900	P60900	P60900
			O43242	O43242	O43242
			Q9HB71	Q9HB71	Q9HB71
			P09429	P09429	P09429
			P30153	P30153	P30153
			Q15102	Q15102	Q15102
			P62829	P62829	P62829
			P48047	P48047	P48047
			B1AKQ8	B1AKQ8	B1AKQ8
			P22234	P22234	P22234
			Q99798	Q99798	Q99798
			P27105	P27105	P27105
			O75489	O75489	O75489
			P04818	P04818	P04818
			P31483	P31483	P31483
			P99999	P99999	P99999
			Q5SRE5	Q5SRE5	Q5SRE5
			O14744	O14744	O14744
			P61981	P61981	P61981
			P53680	P53680	P53680
			O94979	O94979	O94979
			P40429	P40429	P40429
			P49915	P49915	P49915
			P08243	P08243	P08243
			P36542	P36542	P36542
			O14980	O14980	O14980
			P49736	P49736	P49736
			Q8TEM1	Q8TEM1	Q8TEM1
			P28072	P28072	P28072
			Q5SSJ5	Q5SSJ5	Q5SSJ5
			Q9Y230	Q9Y230	Q9Y230
			P50914	P50914	P50914
			O43143	O43143	O43143
			O43324	O43324	O43324
			P54136	P54136	P54136
			O43678	O43678	O43678
			P27816	P27816	P27816
			P62495	P62495	P62495
			P49327	P49327	P49327
			Q92841	Q92841	Q92841
			Q12770	Q12770	Q12770
			Q14697	Q14697	Q14697
			O43447	O43447	O43447
			P39656	P39656	P39656
			Q15154	Q15154	Q15154
			Q8WUM4	Q8WUM4	Q8WUM4
			Q15366	Q15366	Q15366
			Q6PKG0	Q6PKG0	Q6PKG0
			Q13310	Q13310	Q13310
			P32119	P32119	P32119
			P42356	P42356	P42356
			Q9UBC2	Q9UBC2	Q9UBC2
			P26599	P26599	P26599
			P54886	P54886	P54886
			P22626	P22626	P22626
			O60506	O60506	O60506
			P11940	P11940	P11940
			Q7RTV0	Q7RTV0	Q7RTV0
			Q16181	Q16181	Q16181
			P31943	P31943	P31943
			P13639	P13639	P13639
			P62899	P62899	P62899
			Q1WWK5	Q1WWK5	Q1WWK5
			Q02790	Q02790	Q02790
			P30050	P30050	P30050
			P54577	P54577	P54577
			P14866	P14866	P14866
			Q9NX63	Q9NX63	Q9NX63
			P11388	P11388	P11388
			P18206	P18206	P18206
			Q9Y5A9	Q9Y5A9	Q9Y5A9
			Q9NR56	Q9NR56	Q9NR56
			O14979	O14979	O14979
			P63173	P63173	P63173
			Q14671	Q14671	Q14671
			P46777	P46777	P46777
			P62701	P62701	P62701
			P38159	P38159	P38159
			P24666	P24666	P24666
			Q99714	Q99714	Q99714
			P60228	P60228	P60228
			P18621	P18621	P18621
			O75694	O75694	O75694
			P46782	P46782	P46782
			Q7L2E3	Q7L2E3	Q7L2E3
			P62750	P62750	P62750
			O60231	O60231	O60231
			Q9Y5K6	Q9Y5K6	Q9Y5K6
			Q9Y262	Q9Y262	Q9Y262
			Q07020	Q07020	Q07020
			P45880	P45880	P45880
			Q92900	Q92900	Q92900
			P61254	P61254	P61254
			Q01813	Q01813	Q01813
			P67870	P67870	P67870
			P26373	P26373	P26373
			O15371	O15371	O15371
			Q96PK6	Q96PK6	Q96PK6
			P30043	P30043	P30043
			P62081	P62081	P62081
			Q12931	Q12931	Q12931
			Q99880	Q99880	Q99880
			P32969	P32969	P32969
			Q8IX12	Q8IX12	Q8IX12
			Q9BZX2	Q9BZX2	Q9BZX2
			P46781	P46781	P46781
			P07900-2	P07900-2	P07900-2
			Q9BWF3	Q9BWF3	Q9BWF3
			Q99613	Q99613	Q99613
			Q16695	Q16695	Q16695
			P62888	P62888	P62888
			P00491	P00491	P00491
			P10809	P10809	P10809
			P05388	P05388	P05388
			O00299	O00299	O00299
			P26640	P26640	P26640
			P13010	P13010	P13010
			P60866	P60866	P60866
			Q13185	Q13185	Q13185
			P42285	P42285	P42285
			P50990	P50990	P50990
			Q9Y6B6	Q9Y6B6	Q9Y6B6
			Q9BUF5	Q9BUF5	Q9BUF5
			P49588	P49588	P49588
			P12956	P12956	P12956
			Q9NP79	Q9NP79	Q9NP79
			O60264	O60264	O60264
			P40227	P40227	P40227
			Q92973	Q92973	Q92973
			O43488	O43488	O43488
			H0YHG0	H0YHG0	H0YHG0
			P37802	P37802	P37802
			P10412	P10412	P10412
			O43633	O43633	O43633
			Q7KZF4	Q7KZF4	Q7KZF4
			P16949	P16949	P16949
			P02100	P02100	P02100
			P08670	P08670	P08670
			B4E386	B4E386	B4E386
			Q14444	Q14444	Q14444
			Q8N5M4	Q8N5M4	Q8N5M4
			P84085	P84085	P84085
			Q00403	Q00403	Q00403
			E9PAU2	E9PAU2	E9PAU2
			P69905	P69905	P69905
			P21912	P21912	P21912
			O95036	O95036	O95036
			Q96AG4	Q96AG4	Q96AG4
			O75643	O75643	O75643
			P61247	P61247	P61247
			Q9ULH0	Q9ULH0	Q9ULH0
			O14776	O14776	O14776
			P61225	P61225	P61225
			Q9Y520	Q9Y520	Q9Y520
			Q9Y5J1	Q9Y5J1	Q9Y5J1
			P42704	P42704	P42704
			Q02543	Q02543	Q02543
			Q05D08	Q05D08	Q05D08
			P23396	P23396	P23396
			A6NKE1	A6NKE1	A6NKE1
			P69891	P69891	P69891
			P84098	P84098	P84098
			Q9BSJ8	Q9BSJ8	Q9BSJ8
			O75367	O75367	O75367
			P26639	P26639	P26639
			P06493	P06493	P06493
			O43390	O43390	O43390
			P37108	P37108	P37108
			P07947	P07947	P07947
			P09651	P09651	P09651
			Q15286	Q15286	Q15286
			O75477	O75477	O75477
			Q9P2J5	Q9P2J5	Q9P2J5
			P62310	P62310	P62310
			P52272	P52272	P52272
			P08754	P08754	P08754
			P49458	P49458	P49458
			P22061	P22061	P22061
			P48729	P48729	P48729
			Q13151	Q13151	Q13151
			F2Z393	F2Z393	F2Z393
			P26368	P26368	P26368
			P31040	P31040	P31040
			P98179	P98179	P98179
			O76021	O76021	O76021
			Q96AE4	Q96AE4	Q96AE4
			P07384	P07384	P07384
			P56192	P56192	P56192
			Q9Y6M1	Q9Y6M1	Q9Y6M1
			P62277	P62277	P62277
			P28331-2	P28331-2	P28331-2
			P19623	P19623	P19623
			P02538	P02538	P02538
			Q5T4S7	Q5T4S7	Q5T4S7
			P62847	P62847	P62847
			Q96I24	Q96I24	Q96I24
			P04632	P04632	P04632
			P31946	P31946	P31946
			P43243	P43243	P43243
			P62263	P62263	P62263
			P78527	P78527	P78527
			P32322	P32322	P32322
			P38646	P38646	P38646
			P27708	P27708	P27708
			Q6UY14	Q6UY14	Q6UY14
			P63244	P63244	P63244
			P14868	P14868	P14868
			O00233	O00233	O00233
			Q7Z5G4	Q7Z5G4	Q7Z5G4
			P20618	P20618	P20618
			Q08J23	Q08J23	Q08J23
			Q15365	Q15365	Q15365
			Q08752	Q08752	Q08752
			P20700	P20700	P20700
			Q92945	Q92945	Q92945
			P50570	P50570	P50570
			Q5JXB2	Q5JXB2	Q5JXB2
			P11586	P11586	P11586
			P55196	P55196	P55196
			P09496	P09496	P09496
			Q13148	Q13148	Q13148
			P09874	P09874	P09874
			P61081	P61081	P61081
			Q9BXJ9	Q9BXJ9	Q9BXJ9
			P42166	P42166	P42166
			P62306	P62306	P62306
			P43487	P43487	P43487
			Q13895	Q13895	Q13895
			P06576	P06576	P06576
			Q8N684	Q8N684	Q8N684
			O60610	O60610	O60610
			O60493	O60493	O60493
			Q99623	Q99623	Q99623
			P05141	P05141	P05141
			P17987	P17987	P17987
			Q13155	Q13155	Q13155
			P62314	P62314	P62314
			Q9H3K6	Q9H3K6	Q9H3K6
			P08559	P08559	P08559
			P33993	P33993	P33993
			Q96EP5	Q96EP5	Q96EP5
			P49406	P49406	P49406
			Q9GZT3	Q9GZT3	Q9GZT3
			Q15233	Q15233	Q15233
			P41252	P41252	P41252
			Q9Y295	Q9Y295	Q9Y295
			Q9BUL8	Q9BUL8	Q9BUL8
			P78371	P78371	P78371
			Q15181	Q15181	Q15181
			O43684	O43684	O43684
			Q9H3S7	Q9H3S7	Q9H3S7
			P61313	P61313	P61313
			P08727	P08727	P08727
			O75179	O75179	O75179
			Q13838	Q13838	Q13838
			P15153	P15153	P15153
			Q13247	Q13247	Q13247
			Q96HS1	Q96HS1	Q96HS1
			Q9BSD7	Q9BSD7	Q9BSD7
			P61221	P61221	P61221
			P50991	P50991	P50991
			O15357	O15357	O15357
			Q9Y3D9	Q9Y3D9	Q9Y3D9
			P62913	P62913	P62913
			P68371	P68371	P68371
			Q15029	Q15029	Q15029
			P49368	P49368	P49368
			O00232	O00232	O00232
			Q8N1F7	Q8N1F7	Q8N1F7
			P08779	P08779	P08779
			P33992	P33992	P33992
			Q13283	Q13283	Q13283
			O00571	O00571	O00571
			P26196	P26196	P26196
			P35637	P35637	P35637
			Q07955	Q07955	Q07955
			P56385	P56385	P56385
			Q9NZI8	Q9NZI8	Q9NZI8
			Q8TC07	Q8TC07	Q8TC07
			O00459	O00459	O00459
			Q15785	Q15785	Q15785
			P01857	P01857	P01857
			P15559	P15559	P15559
			Q6P2Q9	Q6P2Q9	Q6P2Q9
			P52594	P52594	P52594
			Q9NZM3-2	Q9NZM3-2	Q9NZM3-2
			P62917	P62917	P62917
			P26358	P26358	P26358
			Q9UKM9	Q9UKM9	Q9UKM9
			P38919	P38919	P38919
			O00541	O00541	O00541
			O43175	O43175	O43175
			Q9Y490	Q9Y490	Q9Y490
			P25788	P25788	P25788
			P62241	P62241	P62241
			P13224	P13224	P13224
			P28482	P28482	P28482
			Q9UNQ2	Q9UNQ2	Q9UNQ2
			Q99873	Q99873	Q99873
			P46783	P46783	P46783
			P46109	P46109	P46109
			B7Z5V2	B7Z5V2	B7Z5V2
			P04264	P04264	P04264
			P40926	P40926	P40926
			P52597	P52597	P52597
			P23246	P23246	P23246
			P62851	P62851	P62851
			P40939	P40939	P40939
			Q14566	Q14566	Q14566
			P62910	P62910	P62910
			P30048	P30048	P30048
			Q12906	Q12906	Q12906
			P62249	P62249	P62249
			P62854	P62854	P62854
			Q13263	Q13263	Q13263
			P51532	P51532	P51532
			P12829	P12829	P12829
			Q9Y3U8	Q9Y3U8	Q9Y3U8
			B4DKZ6	B4DKZ6	B4DKZ6
			P60468	P60468	P60468
			Q02878	Q02878	Q02878
			Q92616	Q92616	Q92616
			Q92522	Q92522	Q92522
			P25205	P25205	P25205
			P02786	P02786	P02786
			P18124	P18124	P18124
			P27694	P27694	P27694
			P35249	P35249	P35249
			Q14011	Q14011	Q14011
			O75340	O75340	O75340
			P05109	P05109	P05109
			P31948	P31948	P31948
			O95777	O95777	O95777
			Q9NSD9	Q9NSD9	Q9NSD9
			P53992	P53992	P53992
			P12270	P12270	P12270
			Q15393	Q15393	Q15393
			Q9BV40	Q9BV40	Q9BV40
			P17844	P17844	P17844
			P10768	P10768	P10768
			Q13765	Q13765	Q13765
			Q01085	Q01085	Q01085
			Q9UHV9	Q9UHV9	Q9UHV9
			Q53FZ2	Q53FZ2	Q53FZ2
			Q96QK1	Q96QK1	Q96QK1
			P07437	P07437	P07437
			Q9BQ69	Q9BQ69	Q9BQ69
			P07737	P07737	P07737
			P50897	P50897	P50897
			Q15185	Q15185	Q15185
			P49411	P49411	P49411
			Q9Y316	Q9Y316	Q9Y316
			Q9UKD2	Q9UKD2	Q9UKD2
			Q15126	Q15126	Q15126
			Q14166	Q14166	Q14166
			Q9P258	Q9P258	Q9P258
			Q9Y3C6	Q9Y3C6	Q9Y3C6
			P30626	P30626	P30626
			Q00059	Q00059	Q00059
			P31151	P31151	P31151
			P06730	P06730	P06730
			Q8N163	Q8N163	Q8N163
			P61604	P61604	P61604
			Q9Y2Q3	Q9Y2Q3	Q9Y2Q3
			P35527	P35527	P35527
			Q15056	Q15056	Q15056
			P53990	P53990	P53990
			Q99729	Q99729	Q99729
			P08648	P08648	P08648
			Q04637	Q04637	Q04637
			Q99661	Q99661	Q99661
			Q08945	Q08945	Q08945
			P62805	P62805	P62805
			Q99615	Q99615	Q99615
			Q92688	Q92688	Q92688
			Q9UPN3	Q9UPN3	Q9UPN3
			P07814	P07814	P07814
			P62266	P62266	P62266
			P36404	P36404	P36404
			Q16658	Q16658	Q16658
			Q14157	Q14157	Q14157
			Q15717	Q15717	Q15717
			Q9NU22	Q9NU22	Q9NU22
			Q9BQG0	Q9BQG0	Q9BQG0
			Q92499	Q92499	Q92499
			Q14103	Q14103	Q14103
			P35908	P35908	P35908
			P43405	P43405	P43405
			O75369	O75369	O75369
			P51991	P51991	P51991
			O95373	O95373	O95373
			Q96PU8	Q96PU8	Q96PU8
			Q9NR30	Q9NR30	Q9NR30
			P26583	P26583	P26583
			P53621	P53621	P53621
			C9JNW5	C9JNW5	C9JNW5
			Q8IWZ3	Q8IWZ3	Q8IWZ3
			O43395	O43395	O43395
			Q9UBQ5	Q9UBQ5	Q9UBQ5
			P09668	P09668	P09668
			P54819	P54819	P54819
			B4DX78	B4DX78	B4DX78
			Q9BYB4	Q9BYB4	Q9BYB4
			Q16698	Q16698	Q16698
			P08621	P08621	P08621
			P62244	P62244	P62244
			Q13347	Q13347	Q13347
			P07339	P07339	P07339
			Q14204	Q14204	Q14204
			Q9NVP1	Q9NVP1	Q9NVP1
			P61289	P61289	P61289
			P02008	P02008	P02008
			P00338	P00338	P00338
			P07741	P07741	P07741
			P22681	P22681	P22681
			Q6P2E9	Q6P2E9	Q6P2E9
			O95372	O95372	O95372
			Q14152	Q14152	Q14152
			Q99848	Q99848	Q99848
			P62424	P62424	P62424
			O75608	O75608	O75608
			Q9HAV4	Q9HAV4	Q9HAV4
			P11387	P11387	P11387
			P33991	P33991	P33991
			Q9NVI7	Q9NVI7	Q9NVI7
			P51570	P51570	P51570
			P35268	P35268	P35268
			P61978	P61978	P61978
			Q13057	Q13057	Q13057
			P02649	P02649	P02649
			P17858	P17858	P17858
			P11717	P11717	P11717
			P62269	P62269	P62269
			P14174	P14174	P14174
			A5YKK6	A5YKK6	A5YKK6
			O14818	O14818	O14818
			P78344	P78344	P78344
			P04843	P04843	P04843
			P39019	P39019	P39019
			Q9UNM6	Q9UNM6	Q9UNM6
			Q9H583	Q9H583	Q9H583
			Q8N983	Q8N983	Q8N983
			P83731	P83731	P83731
			P06899	P06899	P06899
			P56537	P56537	P56537
			P37837	P37837	P37837
			Q96P48	Q96P48	Q96P48
			Q9BZE4	Q9BZE4	Q9BZE4
			P28331	P28331	P28331
			P62873	P62873	P62873
			Q9NVA2	Q9NVA2	Q9NVA2
			O14950	O14950	O14950
			Q86V81	Q86V81	Q86V81
			O43617	O43617	O43617
			Q96DH6	Q96DH6	Q96DH6
			Q59G98	Q59G98	Q59G98
			Q14839	Q14839	Q14839
			Q8NI27	Q8NI27	Q8NI27
			O95721	O95721	O95721
			Q96C36	Q96C36	Q96C36
			P61088	P61088	P61088
			Q8N752	Q8N752	Q8N752
			P49023	P49023	P49023
			P35968	P35968	P35968
			O60565	O60565	O60565
			P62136	P62136	P62136
			O43294	O43294	O43294
			P07585	P07585	P07585
			P56945	P56945	P56945
			P30041	P30041	P30041
			P54274	P54274	P54274
			Q9NYB0	Q9NYB0	Q9NYB0
			P09493	P09493	P09493
			P62906	P62906	P62906
			P08865	P08865	P08865
			Q9BSI4	Q9BSI4	Q9BSI4
			Q96AP0	Q96AP0	Q96AP0
			Q9NUX5	Q9NUX5	Q9NUX5
			P34969	P34969	P34969
			P08708	P08708	P08708
			P06733	P06733	P06733
			Q16082	Q16082	Q16082
			P14618	P14618
			P07237	P07237	P07237
			P12814	P12814	P12814
			P26641	P26641	P26641
			P35579	P35579	P35579
			Q8IVE3	Q8IVE3	Q8IVE3
			P84022	P84022	P84022
			Q15796	Q15796	Q15796
			P36897	P36897	P36897
			P37173	P37173	P37173
			P98164	P98164	P98164
			O94973	O94973	O94973
			P48307	P48307	P48307
			P12757	P12757	P12757
			P35555	P35555	P35555
			P00747	P00747	P00747
			P05121	P05121	P05121
			Q08345	Q08345	Q08345
			O95758	O95758	O95758
			P25067	P25067	P25067
			P08123	P08123	P08123
			P09486	P09486	P09486
			P16035	P16035	P16035
			P16112	P16112	P16112
			Q99727	Q99727	Q99727
			P01033	P01033	P01033
			CPX-1714	CPX-1714	CPX-1714
			O75173	O75173	O75173
			P08253	P08253	P08253
			P78536	P78536	P78536
			Q13444	Q13444	Q13444
			Q15797	Q15797	Q15797
			Q03692	Q03692	Q03692
			Q13087	Q13087	Q13087
			Q00597	Q00597	Q00597
			P06703	P06703	P06703
			P29034	P29034	P29034
			P05156	P05156	P05156
			Q14624	Q14624	Q14624
			P0DP25	P0DP25	P0DP25
			P0DMV8	P0DMV8	P0DMV8
			Q9NX58	Q9NX58	Q9NX58
			Q9Y4K3	Q9Y4K3	Q9Y4K3
			O60739	O60739	O60739
			Q9Y5S2	Q9Y5S2	Q9Y5S2
			Q96BK5	Q96BK5	Q96BK5
			P32121	P32121	P32121
			O43586	O43586	O43586
			Q13233	Q13233	Q13233
			Q99558	Q99558	Q99558
			Q9NPJ6	Q9NPJ6	Q9NPJ6
			Q15643	Q15643	Q15643
			Q01780	Q01780	Q01780
			Q14164	Q14164	Q14164
			P78396	P78396	P78396
			Q14240	Q14240	Q14240
			Q9Y572	Q9Y572	Q9Y572
			Q92597	Q92597	Q92597
			Q9BUV8	Q9BUV8	Q9BUV8
			O00422	O00422	O00422
			P22392	P22392	P22392
			Q9Y5J5	Q9Y5J5	Q9Y5J5
			Q15714	Q15714	Q15714
			P43360	P43360	P43360
			Q9HC24	Q9HC24	Q9HC24
			Q9UKE5	Q9UKE5	Q9UKE5
			P62330	P62330	P62330
			Q9Y6E0	Q9Y6E0	Q9Y6E0
			Q15008	Q15008	Q15008
			P25942	P25942	P25942
			Q9BRP4	Q9BRP4	Q9BRP4
			P30480	P30480	P30480
			O75815	O75815	O75815
			Q9UBN6	Q9UBN6	Q9UBN6
			P19532	P19532	P19532
			P43686	P43686	P43686
			Q9Y478	Q9Y478	Q9Y478
			D3DR86	D3DR86	D3DR86
			Q9NZJ5	Q9NZJ5	Q9NZJ5
			P20333	P20333	P20333
			P22303	P22303	P22303
			O43353	O43353	O43353
			O43318-2	O43318-2	O43318-2
			Q9NQT4	Q9NQT4	Q9NQT4
			P04049	P04049	P04049
			O95400	O95400	O95400
			Q15654	Q15654	Q15654
			P78545	P78545	P78545
			Q9H1Y0	Q9H1Y0	Q9H1Y0
			Q92956	Q92956	Q92956
			Q9UHX1	Q9UHX1	Q9UHX1
			Q13177	Q13177	Q13177
			Q9UET6	Q9UET6	Q9UET6
			O15460	O15460	O15460
			O95402	O95402	O95402
			P10275	P10275	P10275
			Q9NWA0	Q9NWA0	Q9NWA0
			Q15653	Q15653	Q15653
			Q01201	Q01201	Q01201
			P38398	P38398	P38398
			Q9H213	Q9H213	Q9H213
			Q9P2H0	Q9P2H0	Q9P2H0
			A0JLT2	A0JLT2	A0JLT2
			P08473	P08473	P08473
			P61073	P61073	P61073
			P51681	P51681	P51681
			P11171	P11171	P11171
			P25815	P25815	P25815
			P19438	P19438	P19438
			Q9Y6K9	Q9Y6K9	Q9Y6K9
			Q99759	Q99759	Q99759
			O15111	O15111	O15111
			O95377	O95377	O95377
			P24593	P24593	P24593
			Q9Y676	Q9Y676	Q9Y676
			Q96HJ5	Q96HJ5	Q96HJ5
			P56747	P56747	P56747
			Q6N075	Q6N075	Q6N075
			Q6IBW4-4	Q6IBW4-4	Q6IBW4-4
			Q9HA82	Q9HA82	Q9HA82
			P36382	P36382	P36382
			Q9Y282	Q9Y282	Q9Y282
			Q8TDV0	Q8TDV0	Q8TDV0
			Q8NBJ4	Q8NBJ4	Q8NBJ4
			Q6UXN8	Q6UXN8	Q6UXN8
			Q9H9P2	Q9H9P2	Q9H9P2
			P48165	P48165	P48165
			Q8NFJ6	Q8NFJ6	Q8NFJ6
			Q9NPE6	Q9NPE6	Q9NPE6
			Q96Q45-2	Q96Q45-2	Q96Q45-2
			Q9BVX2	Q9BVX2	Q9BVX2
			Q96GZ6	Q96GZ6	Q96GZ6
			Q9H2H9	Q9H2H9	Q9H2H9
			Q8IYS2	Q8IYS2	Q8IYS2
			P25024	P25024	P25024
			Q96JW4	Q96JW4	Q96JW4
			Q8TB40	Q8TB40	Q8TB40
			Q8WY91	Q8WY91	Q8WY91
			O95279	O95279	O95279
			P41181	P41181	P41181
			O60883	O60883	O60883
			Q86WK6	Q86WK6	Q86WK6
			P19397	P19397	P19397
			Q8IVF2-3	Q8IVF2-3	Q8IVF2-3
			O15393-2	O15393-2	O15393-2
			Q5T700	Q5T700	Q5T700
			Q3KNW5	Q3KNW5	Q3KNW5
			Q8WZ55	Q8WZ55	Q8WZ55
			Q8TDT2	Q8TDT2	Q8TDT2
			Q9NZD1	Q9NZD1	Q9NZD1
			Q4KMG9	Q4KMG9	Q4KMG9
			Q9UKG4	Q9UKG4	Q9UKG4
			Q96MV1	Q96MV1	Q96MV1
			Q5TGU0	Q5TGU0	Q5TGU0
			Q6ZS10	Q6ZS10	Q6ZS10
			Q5JX71	Q5JX71	Q5JX71
			Q86WI0	Q86WI0	Q86WI0
			Q13113	Q13113	Q13113
			Q96BI3	Q96BI3	Q96BI3
			Q9NYP7	Q9NYP7	Q9NYP7
			Q8TBE3	Q8TBE3	Q8TBE3
			Q8TED1	Q8TED1	Q8TED1
			Q9UBD6	Q9UBD6	Q9UBD6
			Q58DX5-2	Q58DX5-2	Q58DX5-2
			Q9GZY8-5	Q9GZY8-5	Q9GZY8-5
			P07306	P07306	P07306
			Q7Z7N9	Q7Z7N9	Q7Z7N9
			Q8N205-2	Q8N205-2	Q8N205-2
			O95471	O95471	O95471
			Q9GZW8	Q9GZW8	Q9GZW8
			O43315	O43315	O43315
			Q96A25	Q96A25	Q96A25
			P57739	P57739	P57739
			Q13642	Q13642	Q13642
			Q8IXL6	Q8IXL6	Q8IXL6
			P05019	P05019	P05019
			O43889-2	O43889-2	O43889-2
			P46379	P46379	P46379
			Q9NRX1	Q9NRX1	Q9NRX1
			P19320	P19320	P19320
			P42766	P42766	P42766
			Q02221	Q02221	Q02221
			P12110	P12110	P12110
			Q99624	Q99624	Q99624
			P20908	P20908	P20908
			Q92754	Q92754	Q92754
			Q9NRI5	Q9NRI5	Q9NRI5
			P52292	P52292	P52292
			P04222	P04222	P04222
			Q9UBI6	Q9UBI6	Q9UBI6
			P02751	P02751	P02751
			Q86VM9	Q86VM9	Q86VM9
			P51858	P51858	P51858
			Q96HU1	Q96HU1	Q96HU1
			Q9BVA1	Q9BVA1	Q9BVA1
			Q13951	Q13951	Q13951
			Q16594	Q16594	Q16594
			P61244	P61244	P61244
			P38936	P38936	P38936
			P08319	P08319	P08319
			Q9Y6N6	Q9Y6N6	Q9Y6N6
			P35609	P35609	P35609
			P05412	P05412	P05412
			P27635	P27635	P27635
			Q9UL18	Q9UL18	Q9UL18
			Q9UKV8	Q9UKV8	Q9UKV8
			Q9HCK5	Q9HCK5	Q9HCK5
			P42167	P42167	P42167
			P06748	P06748	P06748
			Q9UBX2	Q9UBX2	Q9UBX2
			P98082	P98082	P98082
			P17096	P17096	P17096
			Q99715	Q99715	Q99715
			Q16549	Q16549	Q16549
			P09871	P09871	P09871
			Q05516	Q05516	Q05516
			P05231	P05231	P05231
			P35367	P35367	P35367
			P03956	P03956	P03956
			P25116	P25116	P25116
			P57073	P57073	P57073
			P08254	P08254	P08254
			P50222	P50222	P50222
			Q6AHZ1	Q6AHZ1	Q6AHZ1
			Q8WUI4-6	Q8WUI4-6	Q8WUI4-6
			Q14192	Q14192	Q14192
			Q9BUH8	Q9BUH8	Q9BUH8
			O00391	O00391	O00391
			Q8WTS1	Q8WTS1	Q8WTS1
			O43399	O43399	O43399
			Q8NI60	Q8NI60	Q8NI60
			Q9Y371	Q9Y371	Q9Y371
			O75923	O75923	O75923
			P12111	P12111	P12111
			P03372	P03372	P03372
			P09341	P09341	P09341
			P01112	P01112	P01112
			P60484	P60484	P60484
			O43542	O43542	O43542
			P30101	P30101	P30101
			Q6FHY5	Q6FHY5	Q6FHY5
			Q14324	Q14324	Q14324
			Q9HBL7	Q9HBL7	Q9HBL7
			P24592	P24592	P24592
			Q9UNA0	Q9UNA0	Q9UNA0
			P35625	P35625	P35625
			P24723	P24723	P24723
			P08238	P08238	P08238
			P50052	P50052	P50052
			Q16625-1	Q16625-1	Q16625-1
			P12643	P12643	P12643
			Q6NW40	Q6NW40	Q6NW40
			Q8IWT0	Q8IWT0	Q8IWT0
			P57078	P57078	P57078
			Q9Y6Q6	Q9Y6Q6	Q9Y6Q6
			O00300	O00300	O00300
			O14788	O14788	O14788
			P43632	P43632	P43632
			P43628	P43628	P43628
			P43627	P43627	P43627
			P43626	P43626	P43626
			Q14943	Q14943	Q14943
			P61769	P61769	P61769
			Q07065	Q07065	Q07065
			Q8IZ52	Q8IZ52	Q8IZ52
			Q12774	Q12774	Q12774
			Q9Y297	Q9Y297	Q9Y297
			P08887	P08887	P08887
			P40189	P40189	P40189
			Q99962	Q99962	Q99962
			Q13526	Q13526	Q13526
			P26022	P26022	P26022
			P05121-PRO_0000032499	P05121-PRO_0000032499	P05121-PRO_0000032499
			P00749	P00749	P00749
			P03950	P03950	P03950
			Q03405	Q03405	Q03405
			Q9UKQ2	Q9UKQ2	Q9UKQ2
			O43493	O43493	O43493
			P01106	P01106	P01106
			P29275	P29275	P29275
			P13196	P13196	P13196
			P05067	P05067	P05067
			Q06187	Q06187	Q06187
			P55000	P55000	P55000
			Q03405-1	Q03405-1	Q03405-1
			Q99750	Q99750	Q99750
			P59991	P59991	P59991
			Q04917	Q04917	Q04917
			P00736	P00736	P00736
			P28300	P28300	P28300
			P02461	P02461	P02461
			Q9H6H4	Q9H6H4	Q9H6H4
			O14796	O14796	O14796
			P13612	P13612	P13612
			Q9NZ20	Q9NZ20	Q9NZ20
			P04040	P04040	P04040
			Q9BXY8	Q9BXY8	Q9BXY8
			P19883	P19883	P19883
			P10599	P10599	P10599
			Q96SQ5	Q96SQ5	Q96SQ5
			Q86UY0	Q86UY0	Q86UY0
			Q02930-3	Q02930-3	Q02930-3
			P49639	P49639	P49639
			Q8NEC5	Q8NEC5	Q8NEC5
			Q8IWL3	Q8IWL3	Q8IWL3
			Q9H7E9	Q9H7E9	Q9H7E9
			P04183	P04183	P04183
			Q5EB52	Q5EB52	Q5EB52
			Q05397	Q05397	Q05397
			Q12841	Q12841	Q12841
			Q14689	Q14689	Q14689
			O43184-2	O43184-2	O43184-2
			P78325	P78325	P78325
			P42772	P42772	P42772
			P51451	P51451	P51451
			P21333	P21333	P21333
			Q9NRR5	Q9NRR5	Q9NRR5
			Q9NQ11	Q9NQ11	Q9NQ11
			P02452	P02452	P02452
			P17020	P17020	P17020
			P04083	P04083	P04083
			Q14145	Q14145	Q14145
			Q96FW1	Q96FW1	Q96FW1
			O43405	O43405	O43405
			P05549-1	P05549-1	P05549-1
			Q96D15	Q96D15	Q96D15
			P41227	P41227	P41227
			Q8IW40	Q8IW40	Q8IW40
			O95983-2	O95983-2	O95983-2
			Q8TAU3	Q8TAU3	Q8TAU3
			Q9UMX1	Q9UMX1	Q9UMX1
			P42226	P42226	P42226
			Q9BUB5	Q9BUB5	Q9BUB5
			O95983	O95983	O95983
			Q8N7B6	Q8N7B6	Q8N7B6
			Q8WUY3	Q8WUY3	Q8WUY3
			Q8IV36	Q8IV36	Q8IV36
			Q9P2K6	Q9P2K6	Q9P2K6
			O75063	O75063	O75063
			P13497-2	P13497-2	P13497-2
			P13497-4	P13497-4	P13497-4
			P05067-PRO_0000000092	P05067-PRO_0000000092	P05067-PRO_0000000092
			P06213	P06213	P06213
			P01344	P01344	P01344
			P01308	P01308	P01308
			P09038	P09038	P09038
			P10301	P10301	P10301
			P06241	P06241	P06241
			P62993	P62993	P62993
			P16333	P16333	P16333
			P46108	P46108	P46108
			P12931	P12931	P12931
			P52306-5	P52306-5	P52306-5
			P38606	P38606	P38606
			Q96HD9	Q96HD9	Q96HD9
			Q9UGU5	Q9UGU5	Q9UGU5
			P27986	P27986	P27986
			P19174	P19174	P19174
			Q9P0J6	Q9P0J6	Q9P0J6
			P68104	P68104	P68104
			P53667	P53667	P53667
			P09669	P09669	P09669
			P47985	P47985	P47985
			Q9BVV7	Q9BVV7	Q9BVV7
			P00395	P00395	P00395
			Q15526	Q15526	Q15526
			Q9Y2R0	Q9Y2R0	Q9Y2R0
			O95169	O95169	O95169
			P20674	P20674	P20674
			Q9UJS0	Q9UJS0	Q9UJS0
			P42858	P42858	P42858
			O95831	O95831	O95831
			P13073	P13073	P13073
			P35232	P35232	P35232
			P13984	P13984	P13984
			Q96PM5	Q96PM5	Q96PM5
			Q9UI09	Q9UI09	Q9UI09
			P00403	P00403	P00403
			Q5S007	Q5S007	Q5S007
			P63000	P63000	P63000
			Q9P0L0	Q9P0L0	Q9P0L0
			P47755	P47755	P47755
			P61019	P61019	P61019
			P21246	P21246	P21246
			P35222	P35222	P35222
			P18146	P18146	P18146
			Q9UJU2	Q9UJU2	Q9UJU2
			P15884	P15884	P15884
			Q12772	Q12772	Q12772
			Q09472	Q09472	Q09472
			P11473	P11473	P11473
			O95863	O95863	O95863
			P08047	P08047	P08047
			Q8N726	Q8N726	Q8N726
			P63165	P63165	P63165
			Q68CP9	Q68CP9	Q68CP9
			O75937	O75937	O75937
			O75586	O75586	O75586
			O15479	O15479	O15479
			P15408	P15408	P15408
			Q8WWQ0	Q8WWQ0	Q8WWQ0
			Q13200	Q13200	Q13200
			P17275	P17275	P17275
			Q99575	Q99575	Q99575
			P17535	P17535	P17535
			P16220	P16220	P16220
			O00358	O00358	O00358
			O95644	O95644	O95644
			P55317	P55317	P55317
			Q9H0H5	Q9H0H5	Q9H0H5
			Q9Y5N6	Q9Y5N6	Q9Y5N6
			Q13415	Q13415	Q13415
			Q13416	Q13416	Q13416
			P68431	P68431	P68431
			Q15006	Q15006	Q15006
			Q01844	Q01844	Q01844
			P62258	P62258	P62258
			P48556	P48556	P48556
			Q8NI37	Q8NI37	Q8NI37
			Q8TCT1	Q8TCT1	Q8TCT1
			P43351	P43351	P43351
			P12004	P12004	P12004
			P19652	P19652	P19652
			P36969	P36969	P36969
			P22736	P22736	P22736
			P16104	P16104	P16104
			O15264	O15264	O15264
			Q9H492	Q9H492	Q9H492
			P60520	P60520	P60520
			Q9H0R8	Q9H0R8	Q9H0R8
			P09211	P09211	P09211
			Q8N3C7	Q8N3C7	Q8N3C7
			Q6P0Q8	Q6P0Q8	Q6P0Q8
			P15336	P15336	P15336
			P39060-PRO_0000005794	P39060-PRO_0000005794	P39060-PRO_0000005794
			Q96II8	Q96II8	Q96II8
			O95295	O95295	O95295
			P02749	P02749	P02749
			P13805	P13805	P13805
			P63104	P63104	P63104
			Q06330	Q06330	Q06330
			Q9Y6D9	Q9Y6D9	Q9Y6D9
			Q08379	Q08379	Q08379
			Q8N0S2	Q8N0S2	Q8N0S2
			Q8TC20	Q8TC20	Q8TC20
			Q9BQD3	Q9BQD3	Q9BQD3
			Q92614	Q92614	Q92614
			Q8TAB5	Q8TAB5	Q8TAB5
			P20963	P20963	P20963
			Q16665	Q16665	Q16665
			Q15843	Q15843	Q15843
			Q6ZNJ1	Q6ZNJ1	Q6ZNJ1
			Q14684-1	Q14684-1	Q14684-1
			P62753	P62753	P62753
			P22087	P22087	P22087
			P36873	P36873	P36873
			P43146	P43146	P43146
			P08240	P08240	P08240
			P60709	P60709	P60709
			Q92734	Q92734	Q92734
			Q9UGC6	Q9UGC6	Q9UGC6
			Q92731	Q92731	Q92731
			O95166	O95166	O95166
			Q7L2Z9	Q7L2Z9	Q7L2Z9
			Q71F23	Q71F23	Q71F23
			Q00839	Q00839	Q00839
			O00567	O00567	O00567
			Q99732	Q99732	Q99732
			P54253	P54253	P54253
			Q9H0X6	Q9H0X6	Q9H0X6
			P62979	P62979	P62979
			O75886	O75886	O75886
			Q6PIL6	Q6PIL6	Q6PIL6
			Q96HR9-2	Q96HR9-2	Q96HR9-2
			Q15038	Q15038	Q15038
			Q9NZC7-5	Q9NZC7-5	Q9NZC7-5
			O75113	O75113	O75113
			P62987	P62987	P62987
			O95208-2	O95208-2	O95208-2
			P37235	P37235	P37235
			Q15025	Q15025	Q15025
			Q9Y6I3-3	Q9Y6I3-3	Q9Y6I3-3
			Q86VP1	Q86VP1	Q86VP1
			P61601	P61601	P61601
			O60784-2	O60784-2	O60784-2
			Q96KP6	Q96KP6	Q96KP6
			Q9UM19	Q9UM19	Q9UM19
			P62760	P62760	P62760
			I6L9I8	I6L9I8	I6L9I8
			O00291	O00291	O00291
			Q9UHD9	Q9UHD9	Q9UHD9
			O95817	O95817	O95817
			Q7Z3K3	Q7Z3K3	Q7Z3K3
			Q15915	Q15915	Q15915
			Q03989	Q03989	Q03989
			Q9NZ52-2	Q9NZ52-2	Q9NZ52-2
			P04844	P04844	P04844
			P27824	P27824	P27824
			P05161	P05161	P05161
			P11279	P11279	P11279
			O14880	O14880	O14880
			O15155	O15155	O15155
			Q9NS69	Q9NS69	Q9NS69
			B0YJ81	B0YJ81	B0YJ81
			O14829	O14829	O14829
			P54829	P54829	P54829
			Q75N90	Q75N90	Q75N90
			P08138	P08138	P08138
			Q09028	Q09028	Q09028
			Q9NXR7	Q9NXR7	Q9NXR7
			P61586	P61586	P61586
			Q13286	Q13286	Q13286
			Q16186	Q16186	Q16186
			Q2MV58	Q2MV58	Q2MV58
			Q6NUS6	Q6NUS6	Q6NUS6
			Q96GX1	Q96GX1	Q96GX1
			Q15910	Q15910	Q15910
			O43765	O43765	O43765
			Q9BSL1	Q9BSL1	Q9BSL1
			O95967	O95967	O95967
			P05187	P05187	P05187
			Q9UMX0	Q9UMX0	Q9UMX0
			P29972	P29972	P29972
			Q9UM22	Q9UM22	Q9UM22
			Q12805	Q12805	Q12805
			Q7Z6N9	Q7Z6N9	Q7Z6N9
			Q9H0I2	Q9H0I2	Q9H0I2
			O43681	O43681	O43681
			O00560	O00560	O00560
			O14770-4	O14770-4	O14770-4
			Q96LT6	Q96LT6	Q96LT6
			Q8IYX3-2	Q8IYX3-2	Q8IYX3-2
			O14735	O14735	O14735
			X5D778	X5D778	X5D778
			Q12837	Q12837	Q12837
			A6NI15	A6NI15	A6NI15
			O95995	O95995	O95995
			Q6IQ23-2	Q6IQ23-2	Q6IQ23-2
			Q6VN20	Q6VN20	Q6VN20
			P60410	P60410	P60410
			Q6L8G8	Q6L8G8	Q6L8G8
			P49901	P49901	P49901
			P53611	P53611	P53611
			P26371	P26371	P26371
			P04792	P04792	P04792
			Q9Y508	Q9Y508	Q9Y508
			Q15046	Q15046	Q15046
			Q8IYE1	Q8IYE1	Q8IYE1
			P69892	P69892	P69892
			P22732	P22732	P22732
			P07225	P07225	P07225
			Q14749	Q14749	Q14749
			Q9HCJ1	Q9HCJ1	Q9HCJ1
			Q9H6K1	Q9H6K1	Q9H6K1
			P62158	P62158	P62158
			P49748	P49748	P49748
			P33897	P33897	P33897
			O00399	O00399	O00399
			Q9NZ43	Q9NZ43	Q9NZ43
			Q6IQ23	Q6IQ23	Q6IQ23
			Q05086-1	Q05086-1	Q05086-1
			Q05086-2	Q05086-2	Q05086-2
			Q05086-3	Q05086-3	Q05086-3
			P63220	P63220	P63220
			Q9H3D4-1	Q9H3D4-1	Q9H3D4-1
			Q5VVX9	Q5VVX9	Q5VVX9
			Q6UXB4	Q6UXB4	Q6UXB4
			Q5C9Z4	Q5C9Z4	Q5C9Z4
			Q9UN86	Q9UN86	Q9UN86
			P67809	P67809	P67809
			P00519	P00519	P00519
			Q15672	Q15672	Q15672
			Q8NI36	Q8NI36	Q8NI36
			Q8N3C0	Q8N3C0	Q8N3C0
			Q13206	Q13206	Q13206
			P37198	P37198	P37198
			Q6P5R6	Q6P5R6	Q6P5R6
			P13489	P13489	P13489
			Q7Z417	Q7Z417	Q7Z417
			Q9GZR7	Q9GZR7	Q9GZR7
			O95363	O95363	O95363
			Q9H7B2	Q9H7B2	Q9H7B2
			Q14694	Q14694	Q14694
			Q5T6F2	Q5T6F2	Q5T6F2
			P35658	P35658	P35658
			Q8WWM7	Q8WWM7	Q8WWM7
			Q6NW34	Q6NW34	Q6NW34
			Q13823	Q13823	Q13823
			Q96RL1	Q96RL1	Q96RL1
			Q92901	Q92901	Q92901
			Q13573	Q13573	Q13573
			Q5U5Q3	Q5U5Q3	Q5U5Q3
			Q7Z6J6	Q7Z6J6	Q7Z6J6
			O00555	O00555	O00555
			P62280	P62280	P62280
			P10644	P10644	P10644
			P01100	P01100	P01100
			Q14008	Q14008	Q14008
			P62837	P62837	P62837
			P51668	P51668	P51668
			Q7L3B6	Q7L3B6	Q7L3B6
			Q9Y266	Q9Y266	Q9Y266
			P37268	P37268	P37268
			P18084	P18084	P18084
			P04406	P04406	P04406
			Q3T8J9	Q3T8J9	Q3T8J9
			P21675	P21675	P21675
			Q8WZ42	Q8WZ42	Q8WZ42
			P02768	P02768	P02768
			Q13643	Q13643	Q13643
			Q8N720	Q8N720	Q8N720
			Q07627	Q07627	Q07627
			Q9HD67	Q9HD67	Q9HD67
			Q13242	Q13242	Q13242
			Q9BY76	Q9BY76	Q9BY76
			Q5JR59-3	Q5JR59-3	Q5JR59-3
			Q9BYR7	Q9BYR7	Q9BYR7
			Q92624	Q92624	Q92624
			P60411	P60411	P60411
			P60409-2	P60409-2	P60409-2
			Q15323	Q15323	Q15323
			O76011	O76011	O76011
			A8MQ03	A8MQ03	A8MQ03
			Q7Z3S9	Q7Z3S9	Q7Z3S9
			P04004	P04004	P04004
			P06756	P06756	P06756
			Q9Y4G6	Q9Y4G6	Q9Y4G6
			Q96AC1	Q96AC1	Q96AC1
			P63208	P63208	P63208
			P51151	P51151	P51151
			Q96I36	Q96I36	Q96I36
			P40692	P40692	P40692
			Q70EL3	Q70EL3	Q70EL3
			Q9Y3C0	Q9Y3C0	Q9Y3C0
			P81172	P81172	P81172
			Q6I9Y2	Q6I9Y2	Q6I9Y2
			P17568	P17568	P17568
			Q99598	Q99598	Q99598
			Q14764	Q14764	Q14764
			P18848	P18848	P18848
			O60307	O60307	O60307
			P51149	P51149	P51149
			P51148	P51148	P51148
			O75787	O75787	O75787
			Q86UK5	Q86UK5	Q86UK5
			Q86X19	Q86X19	Q86X19
			Q8IYT8	Q8IYT8	Q8IYT8
			O75807	O75807	O75807
			Q5HYA8	Q5HYA8	Q5HYA8
			Q96Q45	Q96Q45	Q96Q45
			Q9P0N5	Q9P0N5	Q9P0N5
			O00400	O00400	O00400
			Q5T3F8	Q5T3F8	Q5T3F8
			Q9Y3E0	Q9Y3E0	Q9Y3E0
			Q8N4V1	Q8N4V1	Q8N4V1
			Q16513	Q16513	Q16513
			Q9H1I8	Q9H1I8	Q9H1I8
			P20807	P20807	P20807
			Q99460	Q99460	Q99460
			Q8IZL9	Q8IZL9	Q8IZL9
			Q9UPZ9	Q9UPZ9	Q9UPZ9
			Q9UQ88	Q9UQ88	Q9UQ88
			P49840	P49840	P49840
			P54727	P54727	P54727
			P54725	P54725	P54725
			P29350-3	P29350-3	P29350-3
			Q93096	Q93096	Q93096
			Q9H1R2-3	Q9H1R2-3	Q9H1R2-3
			Q99436	Q99436	Q99436
			P37231	P37231	P37231
			P54578	P54578	P54578
			O00487	O00487	O00487
			P51665	P51665	P51665
			Q9Y5K5	Q9Y5K5	Q9Y5K5
			P55036	P55036	P55036
			Q99459	Q99459	Q99459
			O75832	O75832	O75832
			Q16401	Q16401	Q16401
			P62191	P62191	P62191
			P62333	P62333	P62333
			P62195	P62195	P62195
			Q15018	Q15018	Q15018
			P25054	P25054	P25054
			Q16659	Q16659	Q16659
			P14625	P14625	P14625
			Unmapped in Uniprot	Mapped using PICR & others EMBL-EBI resources
			MULT_82_human	6 P02747 + 6 P02745 + 6 P02746	P02747
			P01024-PRO_0000005915	P01024	P01024
			5fo7	P01024
			ENSG00000172315	Q96S44	Q96S44
			ENSG00000134333	P00338
			CHEBI:61048	GM2
			EBI-17198574	Q3LI67	Q3LI67
			A0A0S2Z4Y0	A0A0S2Z4Y0	A0A0S2Z4Y0
			ENSG00000112715	ENSG00000112715	unreviewed
			ENSG00000186352	Q7Z713	Q7Z713
			ENSG00000113739	O76061	O76061
			EBI-7957585	O15525	O15525
			EBI-7957721	O60675	O60675
			ENSG00000067225	P14618
			ENSG00000076321	Q9Y2M5	Q9Y2M5
			ENSG00000121067	O43791	O43791
			EBI-11580917	pri_mir_215
			EBI-11581337	microRNA let-7i
			EBI-17182143	pseudogene
			EBI-10965804	obsolete Uniparc entry
			EBI-6192353	unmapped
			EBI-6192338	nog1-like
			EBI-6192398	k1c10-like
			EBI-6192353	unmapped
			EBI-6192338	nog1-like
			EBI-6192398	k1c10-like
			EBI-6190532	c9j6d7_human
			EBI-6192381	a9ln06-like
			EBI-6192393	smd2-like
			EBI-6192365	tbb6-like
			EBI-6192387	rs12-like
			EBI-6192360	hbg2-like
			CPX-1919	P02745-P02746-P02747	P02746
					P02745
					P02747
			CPX-973	P01024
			EBI-1059087	unmapped
			EBI-473810	oks16_human
			A0A024R8L2	HCG1987119, isoform CRA_a
			ENSG00000134460	IL2R
			EBI-10092826	unmapped
			A0A024R8L2	HCG1987119, isoform CRA_a
			A0A0C4DFQ7	Kv channel-interacting protein 1
			EBI-11749135	krtap13
			UniprotKB reviewed/Total		1879

## Sheet: Table 5
	Normal Liver protein-coding genes datasets
	Literature source: Uhlén M. et. al. Mol Syst Biol. 2016, 12: 862. DOI 10.15252/msb.20155865
	Total unique protein-coding genes: 341 reviewed proteins
	Tissue enriched		Group Enriched		Enhanced		Mixed
	Gene name	UniProtKB	Gene name	UniProtKB	Gene name	UniProtKB	Gene name	UniProtKB
	SLC10A1	Q14973	GCGR	P47871	CDO1	Q16878	CYP3A43	Q9HB55
	CFB	P00751	SEC14L4	Q9UDX3	ADRA1A	P35348	ITIH4	Q14624
	SLC22A25	Q6T423	ASPDH	A6ND91	CLEC4G	Q6UXB4	PRG4	Q92954
	APCS	P02743	CNDP1	Q96KN2	TMEM56	Q96MV1	ABCB11	O95342
	F12	P00748	SLC6A1	P30531	AGMO	Q6ZNB7	ANG	P03950
	CYP2C8	P10632	CLRN3	Q8NCR9	IL1RAP	Q9NPH3	PON3	Q15166
	ABCB4	P21439	HNF4A	P41235	C2	P06681	TMPRSS6	Q8IU80
	RBP4	P02753	TMEM82	A0PJX8	CFI	P05156	ARID3C	A6NKF2
	TTR	P02766	FOXA3	P55318	GPLD1	P80108	HSD11B1	P28845
	ORM2	P19652	MOGAT2	Q3SYC2	THPO	P40225	AFP	P02771
	TAT	P17735	NAT2	P11245	EVA1A	Q9H8M9	CLEC1B	Q9P126
	TF	P02787	XDH	P47989	METTL7B	Q6UX53	SAA2	P0DJI9
	AMBP	P02760	TM4SF4	P48230	C4A	P0C0L4	ACSM5	Q6NUN0
	CYP8B1	Q9UNU6	ALDOB	P05062	HS3ST3B1	Q9Y662	F11	P03951
	BAAT	Q14032	KHK	P50053	XYLB	O75191	AMDHD1	Q96NU7
	CP	P00450	GLTPD2	A6NH11	PROX1	Q92786	CHRNA4	P43681
	CFHR1	Q03591	SLC28A1	O00337	ACOX2	Q99424	MT1B	P07438
	HSD17B6	O14756	SULT1E1	P49888	ASPG	Q86U10	EPO	P01588
	PLG	P00747	IGSF23	A1L1A6	F10	P00742	G6PC	P35575
	APOC2	P02655	CYP3A4	P08684	ANGPTL6	Q8NI99	SMLR1	H3BR10
	CPB2	Q96IY4	MTTP	P55157	FMO5	P49326	IL27	Q8NEV9
	CA5A	P35218	OTC	P00480	GJB1	P08034	PNPLA3	Q9NST1
	SPP2	Q13103	TM4SF5	O14894	C4B	P0C0L5	SULT2A1	Q06520
	CYP3A7	P24462	THRSP	Q92748	VNN3	Q9NY84	CYP4F3	Q08477
	ADH4	P08319	C19orf80	Q6UXH0	RND1	Q92730	PKLR	P30613
	FGA	P02671	DGAT2	Q96PD7	C2orf72	A6NCS6	HMGCS2	P54868
	FGG	P02679	SERPINA4	P29622	SLC30A10	Q6XR72	UGT2B15	P54855
	FMO3	P31513	F5	P12259	NR0B2	Q15466	ONECUT1	Q9UBC0
	CFHR5	Q9BXR6	HFE2	Q6ZVN8	FBP1	P09467	TRIM55	Q9BYV6
	C6	P13671	PROZ	P22891	C1orf168	Q5VWT5	HPN	P05981
	UGT1A4	P22310	ACMSD	Q8TDX5	CYP4F11	Q9HBI6	RBP5	P82980
	SERPINA7	P05543	DAO	P14920	BCO2	Q9BYV7	PCK1	P35558
	CYP1A2	P05177	DNMT3L	Q9UJW3	PAQR9	Q6ZVX9	UGT3A1	Q6NUS8
	TFR2	Q9UP52	EHHADH	Q08426	ALDH1L1	O75891	GLDC	P23378
	CPN1	P15169	APOM	O95445	ARSE	P51690	NR1H4	Q96RI1
	SLC25A47	Q6Q0C1	DPYS	Q14117	GRB14	Q14449	CYP2C18	P33260
	APOC3	P02656	UPB1	Q9UBR1	HGD	Q93099	AADAC	P22760
	AHSG	P02765	CYP4A11	Q02928	ABCC6	O95255	SLC51A	Q86UW1
	HAO1	Q9UJM8	PRODH2	Q9UF12	GSTA1	P08263	NR1I2	O75469
	C5	P01031	AGXT2	Q9BYV1	KMO	O15229	SHBG	P04278
	PON1	P27169	CYP4A22	Q5TCH4	PANK1	Q8TE04	AOX1	Q06278
	CYP2E1	P05181	GLYATL1	Q969I3	MIA2	Q96PC5	ARG1	P05089
	CYP7A1	P22680	ACSM2B	Q68CK6	PCSK9	Q8NBP7	SLC25A18	Q9H1K4
	FGL1	Q08830	BHMT2	Q9H2M3	SEC14L2	O76054	CUX2	O14529
	C9	P02748	HPD	P32754	A1CF	Q9NQ94	FABP1	P07148
	PGLYRP2	Q96PD5	FTCD	O95954	HYAL1	Q12794	UNC93A	Q86WB7
	CYP2A7	P20853	PIPOX	Q9P0Z9	NPW	Q8N729	ABCC2	Q92887
	SLC22A10	Q63ZE4	PAH	P00439	ADH1C	P00326	VNN1	O95497
	FGB	P02675	UGT2B7	P16662	CHST13	Q8NET6	PLA2G12B	Q9BX93
	PLGLB2	Q02325	HAO2	Q9NYQ3			CYP4F2	P78329
	HP	P00738	GLYAT	Q6IB77			DEPDC7	Q96QD5
	AKR1D1	P51857	ACSM2A	Q08AH3			GOLT1A	Q6ZVE7
	SLC17A2	O00624	SLC22A7	Q9Y694			PFKFB1	P16118
	SLC22A1	O15245	DMGDH	Q9UI17			KLB	Q86Z14
	HPR	P00739	GSTA2	P09210			CES5A	Q6NT32
	HRG	P04196	BHMT	Q93088			CES1	P23141
	INHBC	P55103	ALDH8A1	Q9H2A2			RIPPLY1	Q0D2K3
	C8A	P07357	GNMT	Q14749			ACOT6	Q3I5F7
	HGFAC	Q04756	IDO2	Q6ZQW0			SLC27A2	O14975
	AGXT	P21549	HAL	P42357			SARDH	Q9UL12
	C8B	P07358	SPDYC	Q5MJ68			DIO1	P49895
	ORM1	P02763	USH2A	O75445			AZGP1	P25311
	ACOT12	Q8WYK0					LRG1	P02750
	SLCO1B3	Q9NPD5					OIT3	Q8WWZ8
	SLC22A9	Q8IVM8					GYS2	P54840
	CYP2B6	P20813					APOC1	P02654
	UGT2B4	P06133					PLGLB1
	CYP2A6	P11509					GLS2	Q9UI32
	SLC38A4	Q969I6					PZP	P20742
	CYP2C9	P11712					SERPINA3	P01011
	CFHR3	Q02985					FCN2	Q15485
	ASGR1	P07306					AGT	P01019
	LIPC	P11150					ABCG8	Q9H221
	MASP2	O00187					ABCG5	Q9H222
	A1BG	P04217					CREB3L3	Q68CJ9
	ADH6	P28332					APOB	P04114
	F2	P00734					C8G	P07360
	TDO2	P48775					UGT1A8	Q9HAW9
	AFM	P43652					APOA1	P02647
	ANGPTL3	Q9Y5C1					CYP2C19	P33261
	GBP7	Q8N8V2					CYP2D6	P10635
	HSD17B13	Q7Z5P4					CPS1	P31327
	HPX	P02790					LBP	P18428
	SLC38A3	Q99624					SAA1	P0DJI8
	MAT1A	Q00266					SAA2-SAA4	A0A096LPE2
	SLC27A5	Q9Y2P5					CRP	P02741
	ASGR2	P07307					HABP2	Q14520
	F13B	P05160					CLDN14	O95500
	SERPINA11	Q86U17					KNG1	P01042
	LEAP2	Q969E1					CLEC4M	Q9H2X3
	ITIH2	P19823					C4BPB	P20851
	TTC36	A6NLP5					COLEC10	Q9Y6Z7
	APOA5	Q6Q788					IGFBP1	P08833
	SERPINF2	P08697					SLC13A5	Q86YT5
	RTP3	Q9BQQ7					IGFALS	P35858
	TTPA	P49638					ATF5	Q9Y2D1
	SLCO1B1	Q9Y6L6
	SLC2A2	P11168
	MBL2	P11226
	APOA2	P02652
	PROC	P04070
	SERPIND1	P05546
	CPN2	P22792
	UROC1	Q96N76
	RDH16	O75452
	GCKR	Q14397
	C4BPA	P04003
	ITIH1	P19827
	APOF	Q13790
	LECT2	O14960
	FETUB	Q9UGM5
	HAMP	P81172
	CFHR2	P36980
	INHBE	P58166
	SDS	P20132
	SAA4	P35542
	SERPINA10	Q9UK55
	GC	P02774
	ALB	P02768
	LPA	P08519
	APOH	P02749
	F7	P08709
	KLKB1	P03952
	UGT2B10	P36537
	F9	P00740
	AKR1C4	P17516
	SERPINA1	P01009
	NR1I3	Q14994
	SERPINC1	P01008
	CYP26A1	O43174
	ADH1A	P07327
	SERPINA6	P08185
	CFHR4	Q92496
	FGF21	Q9NSA1								UniprotKB reviewed
	ITIH3	Q06033								Total elevated
Total										341
		135		62		49		95

## Sheet: Table 6
	Fibrotic Liver protein-coding genes dataset
	Literature source: Hotta K. et. al. Hepatol Res. 2017, 47(13):1445-1458. DOI: 10.1111/hepr.12877.
	Total unique protein-coding genes: 1721 reviewed proteins
	Gene name	UniProtKb		Gene name	UniProtKb		Gene name	UniProtKb		Gene name	UniProtKb
	EFEMP1	Q12805		SAMD4A	Q9UPU9		RAB37	Q96AX2		C19orf80	Q6UXH0
	LUM	P51884		MT1B	P07438		CDC14B	O60729		HSPA5	P11021
	TMEM42	Q69YG0		ZEB2	O60315		KIF22	Q14807		IFFO2	Q5TF58
	DPT	Q07507		SNAP47	Q5SQN1		FDX1L	Q6P4F2		MORC4	Q8TE76
	CCL21	O00585		EBPL	Q9BY08		SLC38A10	Q9HBR0		PRKX	P51817
	FBLN5	Q9UBX5		NAP1L1	P55209		ARHGDIB	P52566		ASCL1	P50553
	THBS2	P35442		GPX8	Q8TED1		MRPL38	Q96DV4		CDKN2A	P42771
	AEBP1	Q8IUX7		GLIS2	Q9BZE0		SLC6A11	P48066		KCNK1	O00180
	LOC148696			SRD5A2	P31213		SLC6A19	Q695T7		RNF126	Q9BV68
	COL1A2	P08123		TSC22D3	Q99576		GALNT16	Q8N428		ADRBK2	P35626
	CD24	P25063		PDE11A	Q9HCR9		MCTP2	Q6DN12		APH1B	Q8WW43
	GPC3	P51654		PHYHD1	Q5SRE7		CES4A	Q5XG92		PRADC1	Q9BSG0
	IGLL5	B9A064		CERCAM	Q5T4B2		ATP2B4	P23634		NAGA	P17050
	C7	P10643		COMT	P21964		STRA13	O14503		RASSF2	P50749
	AQP1	P29972		XPNPEP2	O43895		SLC2A8	Q9NY64		COL4A3	Q01955
	EPCAM	P16422		CD1E	P15812		MIR3649			PNN	Q9H307
	DKK3	Q9UBP4		FAM13C	Q8NE31		ITGA4	P13612		ELL2	O00472
	ITGBL1	O95965		CHID1	Q9BWS9		NDUFV1	P49821		TEX264	Q9Y6I9
	COL1A1	P02452		CPE	P16870		COX5B	P10606		GAB3	Q8WWW8
	MROH2A	A6NES4		GPR124	Q96PE1		OSGIN1	Q9UJX0		PFN2	P35080
	MMP2	P08253		PTPRC	P08575		AP2S1	P53680		LINC00890
	CFTR	P13569		LGALS4	P56470		QPRT	Q15274		FCAMR	Q8WWV6
	CHI3L1	P36222		TCEA2	Q15560		FAHD1	Q6P587		WDR59	Q6PJI9
	EPHA3	P29320		MT1A	P04731		MBL2	P11226		DPYD	Q12882
	LAMC3	Q9Y6N6		IQGAP1	P46940		COQ10A	Q96MF6		CDC7	O00311
	MFAP4	P55083		ANXA3	P12429		CAPG	P40121		SAMD9	Q5K651
	PDGFRA	P16234		ACSS1	Q9NUB1		PDLIM3	Q53GG5		ARHGEF6	Q15052
	AKR1B10	O60218		GJB4	Q9NTQ9		CXCL2	P19875		SLFN5	Q08AF3
	IGFALS	P35858		SLC26A10	Q8NG04		LAPTM5	Q13571		FAM98A	Q8NCA5
	IGJ	P01591		LINC00844			KRT23	Q9C075		EHD3	Q9NZN3
	BICC1	Q9H694		TMEM82	A0PJX8		NLRP6	P59044		INHBE	P58166
	VWF	P04275		CD109	Q6YHK3		IFI6	P09912		CD93	Q9NPY3
	MYH1	P12882		ACADSB	P45954		PLXDC2	Q6UX71		ZNF211	Q13398
	SPP1	P10451		AIF1L	Q9BQI0		PLEKHA6	Q9Y2H5		NKD2	Q969F2
	DCDC2	Q9UHG0		CAPN5	O15484		ZBED5	Q49AG3		DNPEP	Q9ULA0
	SVEP1	Q4LDE5		ANGPTL2	Q9UKU9		TCEAL3	Q969E4		TBC1D2B	Q9UPU7
	CLSTN2	Q9H4D0		COL15A1	P39059		DUS1L	Q6P1R4		MYO10	Q9HD67
	ANTXR1	Q9H6X2		FSTL1	Q12841		MRC2	Q9UBG0		GSDMB	Q8TAX9
	SOX9	P48436		ZNF217	O75362		IFI27	P40305		WWC1	Q8IX03
	PLCXD3	Q63HM9		SULF1	Q8IWU6		IYD	Q6PHW0		MYH11	P35749
	HKDC1	Q2TB90		WISP1	O95388		RSAD1	Q9HA92		ENOSF1	Q7L5Y1
	PODN	Q7Z5L7		DPYSL2	Q16555		DNAJC12	Q9UKB3		GAMT	Q14353
	CYBRD1	Q53TN4		GPR88	Q9GZN0		NDUFB8	O95169		SDC2	P34741
	COL3A1	P02461		CD48	P09326		CYS1	Q717R9		PLXNC1	O60486
	GEM	P55040		GSDMD	P57764		PERP	Q96FX8		MIS18BP1	Q6P0N0
	UBD	O15205		SORD	Q00796		C16orf45	Q96MC5		PRR15L	Q9BU68
	DCN	P07585		GGT5	P36269		CA14	Q9ULX7		CUX2	O14529
	NEU4	Q8WWR8		MAP2K3	P46734		NR1D2	Q14995		KIF12	Q96FN5
	COL14A1	Q05707		IL2RG	P31785		CNTNAP2	Q9UHC6		BCRP3
	PTGDS	P41222		KCNJ15	Q99712		SFXN2	Q96NB2		RAB8B	Q92930
	EGR1	P18146		ITIH5	Q86UX2		MYOM1	P52179		HS6ST1	O60243
	GALK1	P51570		ARSD	P51689		ADORA2A-AS1	P86434		SLITRK3	O94933
	SMOC2	Q9H3U7		RCL1	Q9Y2P8		SHROOM3	Q8TF72		IGFBP1	P08833
	TMCC3	Q9ULS5		FBXL19	Q6PCT2		BMS1P20			SLC46A1	Q96NT5
	CCDC80	Q76M96		HSPA4L	O95757		ZNF714	Q96N38		LPAR1	Q92633
	ANK3	Q12955		QDPR	P09417		GJA1	P17302		HINT1	P49773
	VCAN	P13611		CLEC2D	Q9UHP7		FAAH	O00519		C19orf60	Q96EN9
	PDGFD	Q9GZP0		EPHX2	P34913		ZNHIT1	O43257		TNFRSF17	Q02223
	MMP7	P09237		BTG2	P78543		TSPAN33	Q86UF1		MPST	P25325
	PRELP	P51888		ITK	Q08881		TRAF1	Q13077		ATRIP	Q8WXE1
	CLEC4M	Q9H2X3		SLC9A3R2	Q15599		ADD3	Q9UEY8		TM4SF1	P30408
	KCNK5	O95279		DES	P17661		GRK5	P34947		CHST11	Q9NPF2
	EHF	Q9NZC4		HINT2	Q9BX68		SCLY	Q96I15		PALLD	Q8WX93
	SDS	P20132		TMEM37	Q8WXS4		SESN2	P58004		MET	P08581
	MT1X	P80297		FZD7	O75084		TRERF1	Q96PN7		PPARA	Q07869
	SFRP5	Q5T4F7		LAIR1	Q6GTX8		ABHD14A	Q9BUJ0		ZDHHC13	Q8IUH4
	TEF	Q10587		LDHD	Q86WU2		COL9A2	Q14055		HCG11
	SOX4	Q06945		ELFN1	P0C7U0		DGKA	P23743		ACBD4	Q8NC06
	PLXNA4	Q9HCM2		FADS6	Q8N9I5		SLAMF1	Q13291		CTPS1	P17812
	FMOD	Q06828		FAM169A	Q9Y6X4		EGFLAM	Q63HQ2		NRBP2	Q9NSY0
	ADAMTSL2	Q86TH1		SGCD	Q92629		SLC29A1	Q99808		PHYH	O14832
	DBP	Q10586		TOLLIP	Q9H0E2		DVL1	O14640		C19orf12	Q9NSK7
	ID4	P47928		SARDH	Q9UL12		MAMLD1	Q13495		EIF1	P41567
	FNIP2	Q9P278		PITPNM3	Q9BZ71		SH2B3	Q9UQQ2		TRPV6	Q9H1D0
	CDH6	P55285		PKM	P14618		SLC47A1	Q96FL8		FLRT3	Q9NZU0
	VIM	P08670		KRT19	P08727		ABCC1	P33527		GNG12	Q9UBI6
	GNMT	Q14749		NSMF	Q6X4W1		TMUB1	Q9BVT8		NAP1L2	Q9ULW6
	DPYSL3	Q14195		ABHD15	Q6UXT9		HBA2	P69905		DOK6	Q6PKX4
	CEBPB	P17676		IFIT1	P09914		MAN2A2	P49641		AGAP3	Q96P47
	NPNT	Q6UXI9		IFIT1B	Q5T764		FOXA2	Q9Y261		MGRN1	O60291
	IGFBP7	Q16270		SEC14L2	O76054		RNF130	Q86XS8		CD81	P60033
	FMO2	Q99518		METRN	Q9UJH8		PPP1R26	Q5T8A7		MAP3K11	Q16584
	FBN1	P35555		KANK4	Q5T7N3		GNG7	O60262		INTS1	Q8N201
	GSN	P06396		CPXM2	Q8N436		UBE2J1	Q9Y385		GPX2	P18283
	ENPP2	Q13822		MGMT	P16455		PTN	P21246		AZGP1P1
	PPP1R1A	Q13522		PMM1	Q92871		MAZ	P56270		CCDC14	Q49A88
	CYP2A13	Q16696		TMEM154	Q6P9G4		APH1A	Q96BI3		HNRNPH1	P31943
	PER1	O15534		GLT8D2	Q9H1C3		NIPAL1	Q6NVV3		BST2	Q10589
	MOXD1	Q6UVY6		B3GNT5	Q9BYG0		NDUFB2	O95178		BPHL	Q86WA6
	C1orf198	Q9H425		CISD3	P0C7P0		PTPRCAP	Q14761		BHLHE40	O14503
	LBH	Q53QV2		ALDH6A1	Q02252		AHCY	P23526		DECR2	Q9NUI1
	IL7R	P16871		BAIAP2	Q9UQB8		SYT11	Q9BT88		TTBK1	Q5TCY1
	MT1F	P04733		BCL6	P41182		LAYN	Q6UX15		MDFI	Q99750
	CKM	P06732		HSD17B11	Q8NBQ5		LAMC1	P11047		YWHAH	Q04917
	ASPG	Q86U10		EPB41L4A	Q9HCS5		PDGFRB	P09619		MIR4721
	F3	P13726		NQO1	P15559		LRRK2	Q5S007		MED16	Q9Y2X0
	KRT7	P08729		MAP3K1	Q13233		ABCC4	O15439		PRNP	F7VJQ1
	RCAN2	Q14206		MYADM	Q96S97		ZBTB42	B2RXF5		ACY3	Q96HD9
	MS4A1	P11836		FCN3	O75636		RGS7BP	Q6MZT1		MKI67	P46013
	CRISPLD2	Q9H0B8		SERPINB9	P50453		CREB1	P16220		TPRA1	Q86W33
	EMP1	P54849		ARRDC2	Q8TBH0		CDK9	P50750		C10orf10	Q9NTK1
	CDH11	P55287		HAAO	P46952		STK35	Q8TDR2		TBL3	Q12788
	FRAS1	Q86XX4		OXER1	Q8TDS5		COL11A2	P13942		ZRANB2	O95218
	CLDN11	O75508		LOC100130417			TMEM125	Q96AQ2		C2orf72	A6NCS6
	RNASE1	P07998		FCER1A	P12319		ZMAT3	Q9HA38		HCLS1	P14317
	LAMA2	P24043		LRRC4C	Q9HCJ2		ALOX5AP	P20292		MRPL40	Q9NQ50
	JAG1	P78504		ITGAD	Q13349		SMDT1	Q9H4I9		ITGA6	P23229
	SUSD2	Q9UGT4		FAM198B	Q6UWH4		GPER1	Q99527		DEF6	Q01524
	DGAT2	Q96PD7		BCL2	P10415		ENPP7	Q6UWV6		RGS12	O14924
	SLC12A2	P55011		IFRD2	Q12894		IER3	P46695		TMEM259	Q4ZIN3
	INMT	O95050		LGALS3	P17931		NPR2	P20594		KLHDC2	Q9Y2U9
	LOC101928292			GRINA	Q7Z429		VKORC1L1	Q8N0U8		ABCC3	O15438
	NALCN	Q8IZF0		AQP4	P55087		LAMA3	Q16787		CPSF1	Q10570
	PTRF	Q6NZI2		ELOVL5	Q9NYP7		MDK	P21741		MUT	P22033
	SLC38A1	Q9H2H9		SLC6A1	P30531		MOGAT1	Q96PD6		DHODH	Q02127
	ANXA2	P07355		ADAMTS12	P58397		NDUFB7	P17568		ATP2A1	O14983
	IL17RE	Q8NFR9		CDC42EP3	Q9UKI2		SERPINH1	P50454		MEP1B	Q16820
	LOXL4	Q96JB6		HLF	Q16534		IGFBP4	P22692		IQSEC1	Q6DN90
	ESPNL	Q6ZVH7		SUN2	Q9UH99		KRT1	P04264		PEPD	P12955
	COL4A1	P02462		PPP1R16A	Q96I34		CES5A	Q6NT32		TNFSF8	P32971
	CACNA1H	O95180		ULK1	O75385		FAM129B	Q96TA1		C8G	P07360
	COL12A1	Q99715		COL25A1	Q9BXS0		RNF165	Q6ZSG1		MTG1	Q9BT17
	DCXR	Q7Z4W1		TRAF5	O00463		TRIM47	Q96LD4		ANKRD9	Q96BM1
	TMC4	Q7Z404		HEG1	Q9ULI3		SOWAHB	A6NEL2		TRAPPC6A	O75865
	GRAMD1B	Q3KR37		ASGR1	P07306		C11orf95	C9JLR9		ITM2C	Q9NQX7
	ADRA2A	P08913		PLA2G5	P39877		MANF	P55145		MLYCD	O95822
	NPR3	P17342		CYP7A1	P22680		FUT8	Q9BYC5		CD1C	P29017
	MAP1B	P46821		STARD8	Q92502		GLRX5	Q86SX6		RNPEPL1	Q9HAU8
	ACADS	P16219		TNFRSF21	O75509		FNDC1	Q4ZHG4		EIF6	P56537
	SH3PXD2A	Q5TCZ1		GZMK	P49863		RHBG	Q9H310		RASGRP3	Q8IV61
	SLC25A10	Q9UBX3		SLC13A5	Q86YT5		SIDT2	Q8NBJ9		FZD1	Q9UP38
	USH2A	O75445		FXYD5	Q96DB9		GOLGA6C	A6NDK9		NDUFA2	O43678
	PODXL	O00592		TP53I13	Q8NBR0		CLDN15	P56746		JUP	P14923
	ANXA5	P08758		OAF	Q86UD1		GRHPR	Q9UBQ7		ZBTB48	P10074
	PLVAP	Q9BX97		CXCL9	Q07325		OLFML1	Q6UWY5		NDUFAB1	O14561
	KCNN2	Q9H2S1		MAPK8IP1	Q9UQF2		DOK4	Q8TEW6		CYC1	P08574
	KIRREL	Q96J84		FKBP8	Q14318		AFAP1	Q8N556		RUNX2	Q13950
	C5orf27	Q52M75		UACA	Q9BZF9		CRIP1	P50238		TTYH1	Q9H313
	CAPN6	Q9Y6Q1		SURF1	Q15526		NAGLU	P54802		SMARCD3	Q6STE5
	SPINT2	O43291		MAFB	Q9Y5Q3		TNFSF10	P50591		DEXI	O95424
	ACSM1	Q08AH1		STK17B	O94768		MRPS26	Q9BYN8		TUT1	Q9H6E5
	SPINT1	O43278		JUN	P05412		FMO5	P49326		EBP	Q15125
	SOX6	P35712		FURIN	P09958		RASGRP1	O95267		HLA-DMB	P28068
	IPW			SGK1	O00141		CABLES1	Q8TDN4		SAMD12	Q8N8I0
	CISH	Q9NSE2		CYP4F12	Q9HCS2		CCDC57	Q2TAC2		MYLPF	Q96A32
	PSAT1	Q9Y617		MRPL41	Q8IXM3		FNDC5	Q8NAU1		GFOD2	Q3B7J2
	MIR612			OSBPL3	Q9H4L5		ADSSL1	Q8N142		CX3CR1	P49238
	GOLM1	Q8NBJ4		SS18L1	O75177		ESPN	B1AK53		PON2	Q15165
	CCDC3	Q9BQI4		FAM3C	Q92520		ZCCHC14	Q8WYQ9		SMCO4	Q9NRQ5
	ELF3	P78545		ST3GAL1	Q11201		DOCK8	Q8NF50		HAL	P42357
	PMEPA1	Q969W9		MID1	O15344		ECHDC2	Q86YB7		ARHGEF17	Q96PE2
	SLC5A1	P13866		ST8SIA3	O43173		AASS	Q9UDR5		SMARCD2	Q92925
	SPON1	Q9HCB6		OVGP1	Q12889		DEPDC7	Q96QD5		RASAL2	Q9UJF2
	ESRP1	Q6NXG1		PACSIN3	Q9UKS6		SYNE3	Q6ZMZ3		HSPB8	Q9UJY1
	THY1	P04216		ECSIT	Q9BQ95		GAL3ST4	Q96RP7		ARRDC1	Q8N5I2
	SORT1	Q99523		HEYL	Q9NQ87		CD74	P04233		AMOTL1	Q8IY63
	SOD3	P08294		SLAMF7	Q9NQ25		FASTK	Q14296		KCNA3	P22001
	LYNX1	P0DP58		RBMS3	Q6XE24		CD248	Q9HCU0		TENC1	Q63HR2
	GPC4	O75487		PFKL	P17858		TEKT4P2	P30038		ITGAM	P11215
	NES	P48681		DHTKD1	Q96HY7		ALDH4A1	O43681		ZNF430	Q9H8G1
	SSPN	Q14714		HIF1A	Q16665		ARSA	P15289		COL8A1	P27658
	PLAT	P00750		HULC			MYOZ1	Q9NP98		MSC	O60682
	ITGA3	P26006		CLDN2	P57739		FABP5	Q01469		EEF1DP3	Q658K8
	LTBP4	Q8N2S1		RUNX1T1	Q06455		CHCHD2	Q9Y6H1		FRY	Q5TBA9
	HGF	P14210		TES	Q9UGI8		CASC10	Q5T4H9		F10	P00742
	KCTD12	Q96CX2		GRAP2	O75791		SLC16A7	O60669		TMEM87B	Q96K49
	OSMR	Q99650		GSTP1	P09211		TOM1	O60784		KLF8	O95600
	MT1E	P04732		LRRC3	Q9BY71		DUSP23	Q9BVJ7		BAD	Q92934
	GABRB3	P28472		ADAMTS1	Q9UHI8		WDR5	P61964		ZNF524	Q96C55
	BSN	Q9UPA5		SOX9	P48436		SSTR1	P30872		HYOU1	Q9Y4L1
	ITGAV	P06756		VEPH1	Q14D04		CLDN23	Q96B33		FGF13	Q92913
	NOTCH3	Q9UM47		CXCL12	P48061		SIVA1	O15304		CORO1A	P31146
	SLIT2	O94813		RAD54L2	Q9Y4B4		MIR6511B1			ACAD10	Q6JQN1
	SLC34A2	O95436		MIR143			RREB1	Q92766		PCSK5	Q92824
	NAGS	Q8N159		ADAM28	Q9UKQ2		C9orf3	Q8N6M6		KIAA1161	Q6NSJ0
	DTNA	Q9Y4J8		FCN2	Q15485		ABCB4	P21439		SEMA6C	Q9H3T2
	CLPTM1L	Q96KA5		GAPT	Q8N292		PROZ	P22891		SLC23A2	Q9UGH3
	FRZB	Q92765		GJA5	P36382		SWAP70	Q9UH65		MAF	O75444
	ASB13	Q8WXK3		PTPRS	Q13332		CYP1A2	P05177		AGPAT2	O15120
	ADCY1	Q08828		RHOBTB1	O94844		COL5A3	P25940		ZFP36	P26651
	GPT2	Q8TD30		PTPN13	Q12923		CCDC112	Q8NEF3		LOC101926960
	PKHD1	P08F94		ATP2A3	Q93084		RNASE6	Q93091		TRHDE	Q9UKU6
	CYFIP2	Q96F07		SIT1	Q9Y3P8		KITLG	P21583		CD5	P06127
	ISLR	O14498		LDOC1	O95751		TMEM150A	Q86TG1		MT1M	P13640
	CCL19	Q99731		DGCR6L	Q9BY27		STARD10	Q9Y365		ATG9A	Q7Z3C6
	SLCO2A1	Q92959		SLC19A1	P41440		CTTNBP2NL	Q9P2B4		KIF5B	P33176
	ARHGEF26	Q96DR7		PPP6R2	O75170		NFIC	P08651		FAM135A	Q9P2D6
	CRMP1	Q14194		CECR2	Q9BXF3		KPNA2	P52292		TSPAN8	P19075
	RHOB	P62745		TNFAIP8	O95379		SEMA7A	O75326		GSTO1	P78417
	CDKN1A	P38936		HAGH	Q16775		ABCB6	Q9NP58		PRRG4	Q9BZD6
	CH25H	O95992		CD79A	P11912		GBP2	P32456		RAB40C	Q96S21
	PXMP2			HERC5	Q9UII4		ZNF43	P17038		ACP2	P11117
	RRAD	P55042		FSD1	Q9BTV5		ABAT	P80404		NARR	P0DI83
	IFI16	Q16666		TOX3	O15405		PFKP	Q01813		GYG2	O15488
	CRIM1	Q9NZV1		RASL11B	Q9BPW5		SRPX	P78539		SERPINA11	Q86U17
	BACE2	Q9Y5Z0		GCGR	P47871		RGS10	O43665		GUCD1	Q96NT3
	GET4	Q7L5D6		NEURL1B	A8MQ27		MIR639			ATP11C	Q8NB49
	SCRN1	Q12765		F2RL1	P55085		SFXN5	Q8TD22		ENPEP	Q07075
	NAPRT1	Q6XQN6		LINC01128			KIAA1462	Q9P266		OSBPL1A	Q9BXW6
	ALDH1L1	O75891		FAM195A	Q9BUT9		CES3	Q6UWW8		MAP1LC3A	Q9H492
	PLA2G2A	P14555		NEO1	Q92859		TMEM156	Q8N614		APOF	Q13790
	PARM1	Q6UWI2		DDT	P30046		SNHG12	Q9BXW3		STAT2	P52630
	NCAM2	O15394		ARRDC3	Q96B67		PSD3	Q9NYI0		GNA11	P29992
	ANXA1	P04083		VEGFC	P49767		PID1	Q7Z2X4		METTL21A	Q8WXB1
	TPM4	P67936		TMEM159	Q96B96		SELM	Q8WWX9		RPL39	P62891
	SIK1	P57059		SLC25A24	Q6NUK1		ESRRA	P11474		LOC153684
	MIR210			FYB	O15117		MLPH	Q9BV36		SLC39A10	Q9ULF5
	OPLAH	O14841		PCK2	Q16822		UNG	P13051		HSPBP1	Q9NZL4
	OLFM2	O95897		EFHD1	Q9BUP0		LINC00630			ZWINT	O95229
	CXCL6	P80162		NPAS2	Q99743		HNRNPA3	P51991		SHMT2	P34897
	PDZK1IP1	Q13113		MRPL12	P52815		ASL	P04424		E2F3	O00716
	TNNT3	P45378		MT1L	Q93083		SGCB	Q16585		MAB21L3	Q8N8X9
	FLRT2	O43155		RIN3	Q8TB24		PEX11G	Q96HA9		HDGF	P51858
	IL32	P24001		DAB2	P98082		FAM129C	Q86XR2		MIB2	Q96AX9
	KLF13	Q9Y2Y9		SGIP1	Q9BQI5		SALL2	Q9Y467		VNN1	O95497
	PMP22	Q01453		NR2F6	P10588		SPON2	Q9BUD6		FETUB	Q9UGM5
	LHFP	Q9Y693		NUDT16L1	Q9BRJ7		NTN4	Q9HB63		TMEM187	Q14656
	HAPLN4	Q86UW8		TESPA1	A2RU30		PDLIM2	Q96JY6		MX1	P20591
	TIMP3	P35625		FGFR2	P21802		MIR34A			MST1P2
	GPNMB	Q14956		PDXP	Q96GD0		CYTIP	O60759		CSGALNACT2	Q8N6G5
	NFASC	O94856		MTHFD2	P13995		CAPN15	O75808		UBL4A	P11441
	ELOVL7	A1L3X0		LSS	P48449		REPIN1	Q9BWE0		TNIK	Q9UKE5
	HOGA1	Q86XE5		SRGAP1	Q7Z6B7		ALDH3A1	P30838		HOXB3	P14651
	CFP	P27918		AHR	P35869		MPZL1	O95297		P2RY8	Q86VZ1
	CLIC6	Q96NY7		GALE	Q14376		CD82	P27701		MYBPC1	Q00872
	CXCL8	P10145		FN3K	Q9H479		COMTD1	Q86VU5		WIPF1	O43516
	FBLN1	P23142		ALOX5	P09917		CLDN10	P78369		PALMD	Q9NP74
	COL16A1	Q07092		EFNA1	P20827		IGSF10	Q6WRI0		MOV10	Q9HCE1
	PTK7	Q13308		DZIP1	Q86YF9		MAD1L1	Q9Y6D9		FGL2	Q14314
	PQLC1	Q8N2U9		LSP1	P33241		POU2AF1	Q16633		PRKCA	P17252
	CPZ	Q66K79		GOT2	P00505		NSRP1	Q9H0G5		POLD2	P49005
	IGSF9	Q9P2J2		PLAGL1	Q9UM63		CHST3	Q7LGC8		STK40	Q8N2I9
	EHD2	Q9NZN4		TRA2A	Q13595		SLC3A2	P08195		LRSAM1	Q6UWE0
	SEL1L3	Q68CR1		SLC27A5	Q9Y2P5		ITIH3	Q06033		APOM	O95445
	SEMA3G	Q9NS98		FITM1	A5D6W6		RBP5	P82980		RPS5	P46782
	PKLR	P30613		F12	P00748		CD6	P30203		CBLC	Q9ULV8
	PTGIS	Q16647		PRAMEF5	Q5TYX0		GGTLC2	Q14390		EDNRA	P25101
	LINC01018			COL4A4	P53420		LCK	P06239		RNF208	Q9H0X6
	PTPN14	Q15678		MEX3B	Q6ZN04		EIF5A	P63241		CD5L	O43866
	B3GNT3	Q9Y2A9		MUC6	Q6W4X9		NUDT8	Q8WV74		CD37	P11049
	SYBU	Q9NX95		WNK2	Q9Y3S1		PCBD1	P61457		RPP25L	Q8N5L8
	CHCHD10	Q8WYQ3		PEX5	P50542		SLC43A1	O75387		THOP1	P52888
	ENDOD1	O94919		GCNT4	Q9P109		DZIP1L	Q8IYY4		COL26A1	Q96A83
	ARID5A	Q03989		TRABD2B	A6NFA1		ENPP3	O14638		LIPC	P11150
	FLNA	P21333		CD40LG	P29965		ZNF135	P52742		PHGDH	O43175
	KBTBD11	O94819		TDGF1	P13385		FAP	Q12884		SLC35C1	Q96A29
	CLEC4F	Q8N1N0		CCDC102B	Q68D86		YAP1	P46937		DOCK11	Q5JSL3
	APOA5	Q6Q788		NTS	P30990		ATAD3A	Q9NVI7		ANKRD36	A6QL64
	ST14	Q9Y5Y6		BIRC3	Q13489		RFNG	Q9Y644		WISP2	O76076
	DACT1	Q9NYF0		CCL22	O00626		CD44	P16070		MRPL55	Q7Z7F7
	CHD3	Q12873		INPP4B	O15327		TNFAIP8L1	Q8WVP5		SORL1	Q92673
	SCUBE1	Q8IWY4		GUCY1A3	Q02108		LOC100129931			SH3RF3	Q8TEJ3
	SERPINE2	P07093		CNPY3	Q9BT09		IGFBP5	P24593		ITGA9	Q13797
	OAT	P04181		CCL5	P13501		COX8A	P10176		TEX30	Q5JUR7
	SPARC	P09486		ERN1	O75460		SNAI1	O95863		PAG1	Q9NWQ8
	MCAM	P43121		ETNPPL	Q8TBG4		PLEKHH3	Q7Z736		GNB4	Q9HAV0
	MMP14	P50281		ACACB	O00763		MFSD3	Q96ES6		ZNF154	Q13106
	FKBP5	Q13451		MALAT1			KLHL41	O60662		CMAS	Q8NFW8
	PRSS23	O95084		STAB1	Q9NY15		RFTN2	Q52LD8		CACNB3	P54284
	C1QTNF7	Q9BXJ2		HAND2	P61296		RPL41	P62945		MYL1	P05976
	ETNK2	Q9NVF9		TRIM22	Q8IYM9		RAC2	P15153		SH3YL1	Q96HL8
	UNC5B	Q8IZJ1		APOBEC3A	P31941		SPOCK2	Q92563		AMPD2	Q01433
	MT1G	P13640		MBD3	O95983		DOLPP1	Q86YN1		THBD	P07204
	CLDN4	O14493		UBE2Q2	Q8WVN8		CD226	Q15762		OIP5-AS1
	HBB	P68871		SLC25A36	Q96CQ1		EHD1	Q9H4M9		ABCA7	Q8IZY2
	RAB11FIP4	Q86YS3		DNPH1	O43598		ST3GAL6	Q9Y274		ABTB2	Q8N961
	TANC1	Q9C0D5		STRADB	Q9C0K7		CPPED1	Q9BRF8		RAI2	Q9Y5P3
	PRICKLE1	Q96MT3		SLCO2B1	O94956		FKBP10	Q96AY3		SPARCL1	Q14515
	CLEC4G	Q6UXB4		SKAP1	Q86WV1		TLR5	O60602		SLC16A10	Q8TF71
	CAPN2	P17655		TLR7	Q9NYK1		LAMB1	P07942		COL5A1	P20908
	BOK	Q9UMX3		DHX57	Q6P158		ARMC5	Q96C12		MFSD6	Q6ZSS7
	NR1D1	P20393		MYCL	P12524		TM7SF2	O76062		SDHA	P31040
	CIART	Q8N365		LYZ	P61626		EHMT1	Q9H9B1		NAIP	Q13075
	KCNJ16	Q9NPI9		AES	Q08117		NOTUM	Q6P988		NFIX	Q14938
	TACSTD2	P09758		PGAP3	Q96FM1		CRAT	P43155		ETFB	P38117
	DNM3OS			HSD3B7	Q9H2F3		CDC34	P49427		IRF2BP1	Q8IU81
	LRRC1	Q9BTT6		NUBP2	Q9Y5Y2		SMIM10	Q96HG1		GUCY2EP
	PDE1A	P54750		NTRK2	Q16620		TMEM92	Q6UXU6		OGDHL	Q9ULD0
	GLS2	Q9UI32		DGCR6	Q14129		WNT4	P56705		COPE	O14579
	SULT1C4	O75897		LGR6	Q9HBX8		LTBP1	Q14766		MRPL57	Q9BQC6
	FCGRT	P55899		ADIPOR2	Q86V24		PIGV	Q9NUD9		MTFR1L	Q9H019
	LTBP2	Q14767		FZD6	O60353		AGMAT	Q9BSE5		PAPLN	O95428
	CRELD1	Q96HD1		TNFSF14	O43557		SHMT1	P34896		CA9	Q16790
	CCR2	P41597		CA2	P00918		MAN1C1	Q9NR34		GNRH2	O43555
	B3GAT1	Q9P2W7		ZBTB33	Q86T24		PROC	P04070
	ACTA2	P62736		ETHE1	O95571		CARD6	Q9BX69
	VTCN1	Q7Z7D3		CPAMD8	Q8IZJ3		CCR4	P51679
	F13A1	P00488		GSTM1	P09488		PAPSS1	O43252
	CYP2D6	P10635		FAM150B	Q6UX46		ATF5	Q9Y2D1
	CLDN14	O95500		KIAA1324L	A8MWY0		MARC1	Q5VT66
	TMEM45B	Q96B21		PHC2	Q8IXK0		KIAA2013	Q8IYS2
	GPR176	Q14439		CXCL1	P09341		HAND2-AS1
	FES	P07332		SLIT3	O75094		EPS8L1	Q8TE68
	IRF4	Q15306		PEX16	Q9Y5Y5		LOC100132891
	PRODH2	Q9UF12		APBA1	Q02410		SHANK3	Q9BYB0
	SEMA6D	Q8NFY4		BEX4	Q9NWD9		ASAP1	Q9ULH1
	SLC2A4	P14672		CALU	O43852		TP53BP2	Q13625
	SH3BP2	P78314		STMN3	Q9NZ72		VPS28	Q9UK41
	HLA-DRA	P01903		MAML2	Q8IZL2		AFMID	Q63HM1
	SLFN13	Q68D06		MOSPD3	O75425		LINC00861
	KLF15	Q9UIH9		ARHGEF10L	Q9HCE6		RHOH	Q15669
	DNASE1L3	Q13609		HRSP12	P52758		KRT10	P13645
	ZBTB16	Q05516		GPR56	Q9Y653		CD3G	P09693
	OLR1	P78380		FAR1	Q8WVX9		NIPSNAP1	Q9BPW8
	SLC22A1	O15245		PDE4D	Q08499		MRPL23	Q16540
	LOXL1	Q08397		GNE	Q9Y223		PHB2	Q99623
	COL6A3	P12111		FUOM	A2VDF0		MITF	O75030
	FAM134B	Q9H6L5		CCDC68	Q9H2F9		FAT1	Q14517
	MVK	Q03426		CELSR1	Q9NYQ6		DDB2	Q92466
	SLC6A13	Q9NSD5		PTMS	P20962		PLD3	Q8IV08
	RGS4	P49798		AURKAIP1	Q9NWT8		C19orf70	Q5XKP0
	S100A14	Q9HCY8		MYO5A	Q9Y4I1		CD14	P08571
	ADAM19	Q9H013		GAL3ST2	Q9H3Q3		PIP4K2A	P48426
	FANCC	Q00597		EZR	P15311		SLFN12	Q8IYM2
	GRAMD1A	Q96CP6		SCAND1	P57086		CD207	Q9UJ71
	GPR125	Q8IWK6		MCM6	Q14566		TMEM25	Q86YD3
	ENHO	Q6UWT2		CAV2	P51636		CCR6	P51684
	MSRB3	Q8IXL7		IVD	P26440		CNDP1	Q96KN2
	LMCD1	Q9NZU5		ISOC2	Q96AB3		NENF	Q9UMX5
	SLC25A22	Q9H936		C21orf33	P30042		MARVELD1	Q9BSK0
	ACMSD	Q8TDX5		HSPA2	P54652		ASMTL	O95671
	CXorf36	Q9H7Y0		HTRA1	Q92743		CHPF2	Q9P2E5
	KDM4B	O94953		ARHGAP35	Q9NRY4		MYL2	P10916
	LRRC24	Q50LG9		ISG15	P05161		CDH13	P55290
	DAK	Q3LXA3		MIR223			LPAR2	Q9HBW0
	RAMP1	O60894		USH1C	Q9Y6N9		MST1L	Q2TV78
	CETP	P11597		PTCHD4	Q6ZW05		ALKBH2	Q6NS38
	NPW	Q8N729		DNMT3L	Q9UJW3		FLI1	Q01543
	DNAH1	Q9P2D7		FILIP1L	Q4L180		GBA3	Q9H227
	SCD5	Q86SK9		IL34	Q6ZMJ4		GALNT15	Q7Z4T8
	GABRP	O00591		SPIRE1	Q08AE8		ZNF37BP
	TNFRSF12A	Q9NP84		CD4	P01730		ZC3H3	Q8IXZ2
	HEPH	Q9BQS7		FMNL3	Q8IVF7		CLNK	Q7Z7G1
	ALKBH7	Q9BT30		GPRIN3	Q6ZVF9		TGFB3	P10600
	TCF4	P15884		PDZRN3	Q9UPQ7		GAS2L3	Q86XJ1
	TMPRSS3	P57727		PTGIR	P43119		TMEM55A	Q8N4L2
	TC2N	Q8N9U0		GCAT	O75600		SLC44A3	Q8N4M1
	ECI1	P42126		PLAU	P00749		HNF1B	P35680
	PROM1	O43490		MYC	P01106		PLEKHH2	Q8IVE3
	PCYT2	Q99447		ADAMTS10	Q9H324		SLC7A9	P82251
	TSKU	Q8WUA8		GCDH	Q92947		LRP5	O75197
	ERV3-1	Q14264		ABI3BP	Q7Z7G0		AGPAT3	Q9NRZ7
	SFRP4	Q6FHJ7		TIMP2	P16035		EDNRB	P24530
	PER3	P56645		RORC	P51449		GPX4	P36969
	VCL	P18206		SULT1A1	P50225		FAM83D	Q9H4H8
	MYO15A	Q9UKN7		GPR153	Q6NV75		TMEM14A	Q9Y6G1
	PCOLCE2	Q9UKZ9		MAPK13	O15264		BCHE	P06276
	RXRA	P19793		TMPRSS6	Q8IU80		VWA5A	O00534
	GSTZ1	O43708		GTF2IRD1	Q9UHL9		C20orf27	Q9GZN8
	PDGFA	P04085		HSPA12A	O43301		LRP3	O75074
	MPPED1	O15442		QSOX1	O00391		STIM1	Q13586
	MME	P08473		PECAM1	P16284		GPAA1	O43292
	COL4A2	P08572		PACS1	Q6VY07		RGCC	Q9H4X1
	APCDD1	Q8J025		AQP3	Q92482		MUM1	Q2TAK8
	CCND2	P30279		REG4	Q9BYZ8		TP53INP2	Q8IXH6
	FASN	P49327		ARMCX2	Q7L311		ACTR1B	P42025
	PLEKHB1	Q9UF11		MYH2	Q9UKX2		PEMT	Q9UBM1
	ITGB1	P05556		SH3BGRL	O75368		HLA-DPB1	P04440
	TUSC3	Q13454		ALPK2	Q86TB3		HSBP1L1	C9JCN9
	PHLDA1	Q8WV24		ANO9	A1A5B4		TRIM28	Q13263
	CD34	P28906		SYTL2	Q9HCH5		NRP1	O14786
	SLC25A15	Q9Y619		SLC25A39	Q9BZJ4		BRAT1	Q6PJG6
	PPAP2C	O43688		SPSB3	Q6PJ21		LINC01127
	RTN4RL2	Q86UN3		BLVRB	P30043		ITM2A	O43736
	H1FX	Q92522		NEAT1			ANKRD50	Q9ULJ7
	CD3E	P07766		NAAA	Q02083		GADD45A	P24522
	POM121L9P			HLA-DRB1	P01911		CDHR2	Q9BYE9
	ASB9	Q96DX5		SLC7A2	P52569		COX7C	P15954
	ELOVL2	Q9NXB9		REEP6	Q96HR9		C12orf75	Q8TAD7
	SPECC1	Q5M775		PLSCR3	Q9NRY6		BMP5	P22003
	GPRC5B	Q9NZH0		CNNM3	Q8NE01		ITGA7	Q13683
	NDRG1	Q92597		LOXL2	Q9Y4K0		C11orf54	Q9H0W9
	SPATA18	Q8TC71		SFXN3	Q9BWM7		LINC01205
	GDF15	Q99988		ASGR2	P07307		TLE1	Q04724
	PLEKHA4	Q9H4M7		CD163L1	Q9NR16		FAM149A	A5PLN7
	ACOX2	Q99424		CTSF	Q9UBX1		ECE1	P42892
	RASSF3	Q86WH2		BGN	P21810		SLC22A7	Q9Y694
	OLFML3	Q9NRN5		SLC25A38	Q96DW6		C1orf226	A1L170
	THBS1	P07996		ITGAX	P20702		STK11	Q15831
	LCAT	P04180		SCPEP1	Q9HB40		TTLL12	Q14166
	AP1M2	Q9Y6Q5		MLXIPL	Q9NP71		SNTA1	Q13424
	FREM2	Q5SZK8		CASP4	P49662		C1orf115	Q9H7X2
	ECHS1	P30084		IGFBP6	P24592		SPN	P16150
	FGFR4	P22455		PHLDB1	Q86UU1		IKZF1	Q13422
	COL5A2	P05997		TECTB	Q96PL2		TTC9	Q92623
	SIGIRR	Q6IA17		SPATA21	Q7Z572		LINC01093
	WBP5	Q9UHQ7		LAX1	Q8IWV1		SLC28A1	O00337
	MARCKS	P29966		ZBTB24	O43167		EPN1	Q9Y6I3
	SNORA60			HGFAC	Q04756		RPS21	P63220
	GPT	P24298		OXCT1	P55809		LOC728392
	MICALL2	Q8IY33		COL18A1	P39060		ANAPC11	Q9NYG5
	PER2	O15055		DBN1	Q16643		XBP1	P17861
	MAP2	P11137		RASEF	Q8IZ41		GNB2	P62879
	CACNA2D1	P54289		TMEM129	A0AVI4		ARHGAP30	Q7Z6I6
	GPRC5C	Q9NQ84		PSD4	Q8NDX1		PNPLA7	Q6ZV29
	PDE3A	Q14432		PPAP2B	O14495		EMB	Q6PCB8
	RNF150	Q9ULK6		SYPL2	Q5VXT5		MALL	Q13021
	CBS	P35520		ASPSCR1	Q9BZE9		FAM173A	Q9BQD7
	SLFN11	Q7Z7L1		CLIP4	Q8N3C7		C9orf47	Q6ZRZ4
	SLC7A5	Q01650		UBXN6	Q9BZV1		ACTG1	P63261
	MSN	P26038		SLC4A7	Q9Y6M7		FOXO1	Q12778
	RND2	P52198		CYR61	O00622		ANXA4	P09525
	ARNTL	O00327		TMEM160	Q9NX00		FOXRED1	Q96CU9
	SLC39A5	Q6ZMH5		C14orf132	Q9NPU4		AAMP	Q13685
	ENPP5	Q9UJA9		CHST4	Q8NCG5		ABCC6	O95255
	CRY2	Q49AN0		SERPINA12	Q8IW75		C19orf24	Q9BVV8
	GADD45G	O95257		CNTFR	P26992		CCL14	Q16627
	ARMC6	Q6NXE6		CCR5	P51681		CEBPD	P49716
	CCDC8	Q9H0W5		MRAS	O14807		PRDX3	P30048
	NTHL1	P78549		FHL2	Q14192		ZNF358	Q9NW07
	TPM1	P09493		NFATC4	Q14934		PPM1K	Q8N3J5
	GSTA7P			HDHD3	Q9BSH5		GLTPD2	A6NH11
	FGF1	P05230		RIMKLB	Q9ULI2		CCDC64	Q6ZP65
	ARID5B	Q14865		ARSJ	Q5FYB0		SLC35F2	Q8IXU6
	GRAMD4	Q6IC98		PLEKHG2	Q9H7P9		LIMS2	Q7Z4I7
	ATP8B2	P98198		FABP1	P07148		ABCB1	P08183
	IL6R	P08887		IL1R1	P14778		DHRS4	Q9BTZ2
	EDA2R	Q9HAV5		SGCA	Q16586		HMSD	A8MTL9
	PAQR5	Q9NXK6		SHF	Q7M4L6		HIF3A	Q9Y2N7
	FRMD6	Q96NE9		NABP1	Q96AH0		MFAP2	P55001
	MB	P02144		LACC1	Q8IV20		PROSER1	Q86XN7
	IGSF8	Q969P0		ALDH1A3	P47895		UNC13D	Q70J99
	ECHDC3	Q96DC8		GYPC	P04921		DDIT4	Q9NX09
	DDX5	P17844		SDSL	Q96GA7		ARHGAP15	Q53QZ3
	ADAMTS2	O95450		CLEC11A	Q9Y240		SCNN1D	P51172
	SLC6A6	P31641		ZNF532	Q9HCE3		SEMA4G	Q9NTN9
	ATP5D	P30049		C14orf105	Q9NVL8		CPA3	P15088
	MFGE8	Q08431		BCAT1	P54687		TBL1X	O60907
	CCBE1	Q6UXH8		BAMBI	Q13145		KIAA0020
	KIT	P10721		TNS1	Q9HBL0		CD99L2	Q8TCZ2
	LIME1	Q9H400		NBEA	Q8NFP9		UNC93A	Q86WB7
	EPDR1	Q9UM22		JAK3	P52333		SRRM1	Q8IYB3
	CRP	P02741		CD101	Q93033		GNAT1	P11488
	GABBR1	Q9UBS5		PNP	P00491		FBP1	P09467
	CCND1	P24385		HSD17B10	Q99714		GPR174	Q9BXC1
	AKR1D1	P51857		AADAT	Q8N5Z0		STARD3	Q14849
	CD2	P06729		COL10A1	Q03692		NR1I2	O75469
	SMO	Q99835		TRABD2A	Q86V40		ARHGEF3	Q9NR81
	S100A6	P06703		PYGM	P11217		C16orf13	Q96S19
	FXYD1	O00168		FAM151A	Q8WW52		GFPT1	Q06210
	UROC1	Q96N76		LUC7L3	O95232		SLCO1A2	P46721
	ROBO1	Q9Y6N7		PLCH2	O75038		TMEM219	Q86XT9
	PCDP1	Q4G0U5		TMEM52	Q8NDY8		RBPMS	Q93062
	HADH	Q16836		PHLDA3	Q9Y5J5		HNRNPR	O43390
	EEF1A2	Q05639		PNMA1	Q8ND90		EPHB3	P54753
	SPHK1	Q9NYA1		SELP	P16109		NPTXR	O95502
	GRTP1	Q5TC63		FAM60A	Q9NP50		ZFP3	Q96NJ6
	SELENBP1	Q13228		RTKN	Q9BST9		MIR4680
	FAM129A	Q9BZQ8		ATP1B2	P14415		MIR3615
	KHK	P50053		FPR3	P25089		CNTN4	Q8IWV2
	CHRNA4	P43681		LOC730101			TBC1D9	Q6ZT07
	RERG	Q96A58		CEBPA	P49715		EIF4EBP1	Q13541
	TPCN2	Q8NHX9		MFSD2A	Q8NA29		SIGMAR1	Q99720
	PCDH18	Q9HCL0		C12orf5	Q9NQ88		P2RY10	O00398
	AMICA1	Q86YT9		CTGF	P29279		RHBDF1	Q96CC6
	ANGPT1	Q15389		SLC37A4	O43826		FUBP1	Q96AE4
	MAPK10	P53779		ZBTB38	Q8NAP3		PARP8	Q8N3A8
	MT2A	P02795		CNGA1	P29973		ADK	P55263
	NIPAL2	Q9H841		CYP27A1	Q02318		FAM73B
	HLA-DMA	P28067		RPS14	P62263		MAPRE1	Q15691
	HLA-DOA	P06340		HELZ2	Q9BYK8		ARPP21	Q9UBL0
	SLC25A1	P53007		AGBL2	Q5U5Z8		PARP15	Q460N3
	RAB17	Q9H0T7		TRNP1	Q6NT89		NR2F1-AS1
	DCDC5	Q6ZRR9		FCER2	P06734		EVI2A	P22794
	DDX26B	Q5JSJ4		SSC5D	A1L4H1		EVI2B	P34910
	KLF9	Q13886		GLTPD1	Q5TA50		PLA2R1	Q13018
	ADI1	Q9BV57		LSR	Q86X29		CTD-3080P12.3
	BBOX1	O75936		PDK2	Q15119		CCDC85C	A6NKD9
	ACSL4	O60488		TMEM119	Q4V9L6		SMOC1	Q9H4F8
	MXRA8	Q9BRK3		ANXA13	P27216		TMSB10	P63313
	DUSP1	P28562		COLEC11	Q9BWP8		TMED3	Q9Y3Q3
	ERRFI1	Q9UJM3		CYP4F3	Q08477		NADK	O95544
	GCHFR	P30047		ELK1	P19419		SLC25A34	Q6PIV7
	TMOD2	Q9NZR1		TCEA3	O75764		DAO	P14920
	DLG3	Q92796		ABCC6P1			MRPL54	Q6P161
	UPB1	Q9UBR1		ATP6V0E2	Q8NHE4		TUBA1A	Q71U36
	PLXNA3	P51805		JUNB	P17275		FBXL7	Q9UJT9
	PLK2	Q9NYY3		TBC1D9B	Q66K14		AP2A2	O94973
	THEM6	Q8WUY1		HK1	P19367		FILIP1	Q7Z7B0
	STEAP4	Q687X5		FSTL3	O95633		GLIPR2	Q9H4G4
	PRODH	O43272		TLE3	Q04726		RAB11FIP3	O75154
	FBLN2	P98095		PRPSAP1	Q14558		ADCK3	Q8NI60
	ASPDH	A6ND91		IKZF3	Q9UKT9		FAM3A	P98173
	CXCR4	P61073		PRKAA2	P54646		HSD11B1	P28845
	TIMP1	P01033		FBXW5	Q969U6		WDR18	Q9BV38
	TDO2	P48775		TUBA1C	Q9BQE3		FAM83H	Q6ZRV2
	LDHB	P07195		SYNPO2	Q9UMS6		RRM2	P31350
	RAB26	Q9ULW5		ZNF204P			SHISA5	Q8N114
	LOC101928104			VWCE	Q96DN2		RGS14	O43566
	LEF1	Q9UJU2		LPIN3	Q9BQK8		FAM198A	Q9UFP1
	CCL2	P13500		CELF2	O95319		DPM3	Q9P2X0
	GLIS3	Q8NEA6		FBLIM1	Q8WUP2		RILP	Q96NA2
	GABRE	P78334		PNPLA3	Q9NST1		SCARF1	Q14162
	SPSB1	Q96BD6		ACP6	Q9NPH0		ITGB4	P16144
	CD96	P40200		ATOH8	Q96SQ7		TCL1A	P56279
	SELO	Q9BVL4		SLC17A9	Q9BYT1		ENO2	P09104
	KDM8	Q8N371		HLA-DPA1	P20036		OGFR	Q9NZT2
	FNDC3B	Q53EP0		ENDOG	Q14249		NDUFS8	O00217
Mapped		486			487			477			274
	not mapped
	LOC148696			LINC00844			MIR3649			LINC00890
	LOC101928292			LOC100130417			BMS1P20			BCRP3
	IPW			HULC			TEKT4P2			HCG11
	MIR612			SOX9-AS1			MIR6511B1			AZGP1P1
	MIR210			MIR143			MIR639			MIR4721
	LINC01018			LINC01128			LINC00630			LOC101926960
	DNM3OS			MALAT1			MIR34A			LOC153684
	POM121L9P			MIR223			LOC100129931			MST1P2
	SNORA60			NEAT1			HAND2-AS1			OIP5-AS1
	GSTA7P			LOC730101			LOC100132891			GUCY2EP
	LOC101928104			ABCC6P1			LINC00861			NR2F1-AS1
	MIR4680			ZNF204P			ZNF37BP			CTD-3080P12.3
	MIR3615			LOC728392			LINC01127			LINC01205
	LINC01093
Not mapped		14			13			13			13
Total		500			500			490			287
							1777

## Sheet: Table 7
	Secreted protein-coding genes datasets
	Database resource: https://www.proteinatlas.org, http://genomics.cicbiogune.es/VerSeDa/index.php, http://bioinformatics.ysu.edu/secretomes/animal/index.php
	Total unique protein-coding genes: 3240 reviewed proteins
	Human Protein Atlas Portal (HPA)		Vertebrate Secretome Database (VerSeDa)			MetazSecKB
	Entry name	UniProtKb (Reviewed)	Entry name	Entry data	UniProtKb (Reviewed)	Gene names	Entry name	UniProtKb (Reviewed)
	A1BG	P04217	SEM3F_HUMAN	ENST00000002829,ENST00000434342	Q13275	ODAM APIN	ODAM_HUMAN	A1E959
	A2M	P01023	PGRP1_HUMAN	ENST00000008938	O75594	PRSS38 MPN2	PRS38_HUMAN	A1L453
	A2ML1	A8K2U0	PGS2_HUMAN	ENST00000052754,ENST00000393155,ENST00000456569,ENST00000552962	P07585	SSC5D	SRCRL_HUMAN	A1L4H1
	A4GNT	Q9UNA3	GRN_HUMAN	ENST00000053867	P28799	CLPSL1 C6orf127	COLL1_HUMAN	A2RUU4
	AADACL2	Q6P093	UTS2_HUMAN	ENST00000054668,ENST00000361696	O95399	SSPO KIAA2036	SSPO_HUMAN	A2VEC9
	AANAT	Q16613	TLL1_HUMAN	ENST00000061240	O43897	VWA8 KIAA0564	VWA8_HUMAN	A3KMH1
	ABCG1	P45844	PRRP_HUMAN	ENST00000165524	P81277	LAMB4	LAMB4_HUMAN	A4D0S4
	ABHD1	Q96SE0	FSTL3_HUMAN	ENST00000166139	O95633	PRSS37 TRYX2	PRS37_HUMAN	A4D1T9
	ABHD10	Q9NUJ1	FGF4_HUMAN	ENST00000168712	P08620	CLEC18A MRLP2	CL18A_HUMAN	A5D8T8
	ABHD14A	Q9BUJ0	MASP1_HUMAN	ENST00000169293,ENST00000296280,ENST00000337774	P48740	PINLYP	PINLY_HUMAN	A6NC86
	ABHD15	Q6UXT9	BPIB2_HUMAN	ENST00000170150	Q8N4F0	VWA3A	VWA3A_HUMAN	A6NCI4
	ABI3BP	Q7Z7G0	SECR_HUMAN	ENST00000176195	P09683	IZUMO1R FOLR4 JUNO	JUNO_HUMAN	A6ND01
	ACACB	O00763	WISP2_HUMAN	ENST00000190983,ENST00000372865,ENST00000372868	O76076	BTBD17	BTBDH_HUMAN	A6NE02
	ACAN	P16112	CHRD_HUMAN	ENST00000204604,ENST00000348986,ENST00000420973	Q9H2X0	FAM24A	FA24A_HUMAN	A6NFZ4
	ACE	P12821	TPO_HUMAN	ENST00000204615,ENST00000445696	P40225	MGAT4D	MGT4D_HUMAN	A6NG13
	ACHE	P22303	TRYD_HUMAN	ENST00000211076	Q9BZJ3	IGLON5	IGLO5_HUMAN	A6NGN9
	ACP2	P11117	AMELY_HUMAN	ENST00000215479,ENST00000383036	Q99218	STRCP1 STRCP	STRCL_HUMAN	A6NGW2
	ACP5	P13686	ALS_HUMAN	ENST00000215539	P35858	OTOL1	OTOL1_HUMAN	A6NHN0
	ACP6	Q9NPH0	MIF_HUMAN	ENST00000215754	P14174	NPIPB15 NPIPL2	NPB15_HUMAN	A6NHN6
	ACP7	Q6ZNF0	ONCM_HUMAN	ENST00000215781	P13725	LILRA5 ILT11 LILRB7 LIR9	LIRA5_HUMAN	A6NI73
	ACPP	P15309	CHADL_HUMAN	ENST00000216241	Q6NUI6	PRSS29P ISP2	PRS29_HUMAN	A6NIE9
	ACR	P10323	NID2_HUMAN	ENST00000216286	Q14112	IGIP C5orf53	IGIP_HUMAN	A6NJ69
	ACRBP	Q8NEB7	CMGA_HUMAN	ENST00000216492	P10645	CGB1	CGB1_HUMAN	A6NKQ9
	ACRV1	P26436	PDYN_HUMAN	ENST00000217305,ENST00000539905,ENST00000540134	P01213	ANXA2P2 ANX2L2 ANX2P2 LPC2B	AXA2L_HUMAN	A6NMY6
	ACSF2	Q96CM8	NEU1_HUMAN	ENST00000217386	P01178	COL6A6	CO6A6_HUMAN	A6NMZ7
	ACTL10	Q5JWF8	LBP_HUMAN	ENST00000217407	P18428	C15orf61	CO061_HUMAN	A6NNL5
	ACVR1	Q04771	CYTS_HUMAN	ENST00000217423	P01036	DHRS7C SDR32C2	DRS7C_HUMAN	A6NNS2
	ACVR1C	Q8NER5	PCSK1_HUMAN	ENST00000218230	Q9UHG2	A2ML1 CPAMD9	A2ML1_HUMAN	A8K2U0
	ACVRL1	P37023	OLFM4_HUMAN	ENST00000219022	Q6UX06	CLCA1 CACC1	CLCA1_HUMAN	A8K7I4
	ACYP1	P07311	CBLN1_HUMAN	ENST00000219197,ENST00000536749	P23435	PRSS47	PRS47_HUMAN	A8MTI9
	ACYP2	P14621	CCL22_HUMAN	ENST00000219235	O00626	HMSD	HMSD_HUMAN	A8MTL9
	ADAM10	O14672	PAG15_HUMAN	ENST00000219345,ENST00000413021	Q8NCC3		YB043_HUMAN	A8MTW9
	ADAM12	O43184	LSHB_HUMAN	ENST00000221421	P01229		YQ048_HUMAN	A8MUN3
	ADAM15	Q13444	DKKL1_HUMAN	ENST00000221498	Q9UK85	SERPINE3	SERP3_HUMAN	A8MV23
	ADAM17	P78536	RETN_HUMAN	ENST00000221515,ENST00000381324	Q9HD89	DEFB108A DEFB108P1; DEFB108C DEFB108P2	DB108_HUMAN	A8MXU0
	ADAM18	Q9Y3Q7	IL27B_HUMAN	ENST00000221847	Q14213	OOSP1	OOSP1_HUMAN	A8MZH6
	ADAM22	Q9P0K1	WNT16_HUMAN	ENST00000222462	Q9UBV4	COL6A5 COL29A1 VWA4	CO6A5_HUMAN	A8TX70
	ADAM28	Q9UKQ2	CBPA2_HUMAN	ENST00000222481	P48052	ISM1 C20orf82 ISM	ISM1_HUMAN	B1AKI9
	ADAM29	Q9UKF5	TFPI2_HUMAN	ENST00000222543	P48307	C1QTNF9B	C1T9B_HUMAN	B2RNN3
	ADAM32	Q8TC27	NPVF_HUMAN	ENST00000222674	Q9HCQ7	VWC2L	VWC2L_HUMAN	B2RUY7
	ADAM33	Q9BZ11	RARR2_HUMAN	ENST00000223271,ENST00000466675,ENST00000482669	Q99969	PATE3	PATE3_HUMAN	B3GLJ2
	ADAM7	Q9H2U9	CO8G_HUMAN	ENST00000224181	P07360	IGLL5	IGLL5_HUMAN	B9A064
	ADAM8	P78325	CCL2_HUMAN	ENST00000225831	P13500	C22orf46	CV046_HUMAN	C9J442
	ADAM9	Q13443	CCL1_HUMAN	ENST00000225842	P22362	HHLA1	HHLA1_HUMAN	C9JL84
	ADAMDEC1	O15204	CCL13_HUMAN	ENST00000225844	Q99616	ADM5 C19orf76	ADM5_HUMAN	C9JUS6
	ADAMTS1	Q9UHI8	CO1A1_HUMAN	ENST00000225964	P02452	C11orf94	CK094_HUMAN	C9JXX5
	ADAMTS10	Q9H324	PAHO_HUMAN	ENST00000225992,ENST00000591228	P01298	STMP1 C7orf73	STMP1_HUMAN	E0CX11
	ADAMTS12	P58397	VTNC_HUMAN	ENST00000226218	P04004	HCG22 G2 PBMUCL2	PBMU2_HUMAN	E2RYF7
	ADAMTS13	Q76LX8	SIAL_HUMAN	ENST00000226284	P21815	PRSS44 TESSP4	PRS44_HUMAN	E7EML9
	ADAMTS14	Q8WXS8	SMR3A_HUMAN	ENST00000226460	Q99954	IFNL4	IFNL4_HUMAN	K9M1U5
	ADAMTS15	Q8TE58	APOA5_HUMAN	ENST00000227665,ENST00000542499	Q6Q788	CCL24 MPIF2 SCYA24	CCL24_HUMAN	O00175
	ADAMTS16	Q8TE57	SCF_HUMAN	ENST00000228280	P21583	LGALS9	LEG9_HUMAN	O00182
	ADAMTS17	Q8TE56	IL23A_HUMAN	ENST00000228534	Q9NPF7	MASP2	MASP2_HUMAN	O00187
	ADAMTS18	Q8TE60	FGF6_HUMAN	ENST00000228837	P10767	CORT UNQ307/PRO350	CORT_HUMAN	O00230
	ADAMTS19	Q8TE59	IL26_HUMAN	ENST00000229134	Q9NPH9	AGRP AGRT ART	AGRP_HUMAN	O00253
	ADAMTS2	O95450	ACRBP_HUMAN	ENST00000229243	Q8NEB7	LEFTY2 EBAF LEFTA LEFTYA TGFB4 PSEC0024	LFTY2_HUMAN	O00292
	ADAMTS20	P59510	LY86_HUMAN	ENST00000230568,ENST00000379953	O95711	TULP1 TUBL1	TULP1_HUMAN	O00294
	ADAMTS3	O15072	HBEGF_HUMAN	ENST00000230990	Q99075	TULP2 TUBL2	TULP2_HUMAN	O00295
	ADAMTS5	Q9UNA0	LYOX_HUMAN	ENST00000231004	P28300	TNFRSF11B OCIF OPG	TR11B_HUMAN	O00300
	ADAMTS6	Q9UKP5	SPRC_HUMAN	ENST00000231061	P09486	MATN2 UNQ193/PRO219	MATN2_HUMAN	O00339
	ADAMTS7	Q9UKP4	IL4_HUMAN	ENST00000231449,ENST00000350025	P05112	QSOX1 QSCN6 UNQ2520/PRO6013	QSOX1_HUMAN	O00391
	ADAMTS8	Q9UP79	IL5_HUMAN	ENST00000231454	P05113	LAD1 LAD	LAD1_HUMAN	O00515
	ADAMTS9	Q9P2N4	SEM3G_HUMAN	ENST00000231721	Q9NS98	CHL1 CALL	NCHL1_HUMAN	O00533
	ADAMTSL1	Q8N6G6	TRFL_HUMAN	ENST00000231751	P02788	RNASET2 RNASE6PL	RNT2_HUMAN	O00584
	ADAMTSL2	Q86TH1	IBP5_HUMAN	ENST00000233813	P24593	CCL21 SCYA21 UNQ784/PRO1600	CCL21_HUMAN	O00585
	ADAMTSL3	P82987	ILRL1_HUMAN	ENST00000233954,ENST00000311734,ENST00000427077	Q01638	FCN1 FCNM	FCN1_HUMAN	O00602
	ADAMTSL4	Q6UY14	PROC_HUMAN	ENST00000234071	P04070	CYR61 CCN1 GIG1 IGFBP10	CYR61_HUMAN	O00622
	ADAMTSL5	Q6ZMM2	CLCA1_HUMAN	ENST00000234701,ENST00000394711	A8K7I4	CCL22 MDC SCYA22 A-152E5.1	CCL22_HUMAN	O00626
	ADCK1	Q86TW2	FGF23_HUMAN	ENST00000237837	Q9GZV9	NTN3 NTN2L	NET3_HUMAN	O00634
	ADCYAP1	P18509	AUGN_HUMAN	ENST00000238044	Q9H1Z8	WNT7A	WNT7A_HUMAN	O00755
	ADCYAP1R1	P41586	TGFB3_HUMAN	ENST00000238682,ENST00000556285	P10600	ISLR UNQ189/PRO215	ISLR_HUMAN	O14498
	ADGRA3	Q8IWK6	LIPG_HUMAN	ENST00000238983,ENST00000608620	P07098	NRG2 NTAK	NRG2_HUMAN	O14511
	ADGRB2	O60241	TNF11_HUMAN	ENST00000239849	O14788	NCAN CSPG3 NEUR	NCAN_HUMAN	O14594
	ADGRD1	Q6QNK2	ACES_HUMAN	ENST00000241069,ENST00000302913,ENST00000411582,ENST00000412389,ENST00000419336,ENST00000428317	P22303	CXCL11 ITAC SCYB11 SCYB9B	CXL11_HUMAN	O14625
	ADGRE3	Q9BY15	NPY_HUMAN	ENST00000242152,ENST00000405982,ENST00000407573	P01303	ENPP3 PDNP3	ENPP3_HUMAN	O14638
	ADGRF1	Q5T601	C4BPB_HUMAN	ENST00000243611,ENST00000367076,ENST00000367078,ENST00000391923	P20851	NRP1 NRP VEGF165R	NRP1_HUMAN	O14786
	ADGRG1	Q9Y653	IL17C_HUMAN	ENST00000244241	Q9P0M4	TNFSF11 OPGL RANKL TRANCE	TNF11_HUMAN	O14788
	ADGRG5	Q8IZF4	COLA1_HUMAN	ENST00000244728,ENST00000370819	Q96P44	APOL1 APOL	APOL1_HUMAN	O14791
	ADGRG6	Q86SQ4	SG1D2_HUMAN	ENST00000244926	O95969	MSTN GDF8	GDF8_HUMAN	O14793
	ADI1	Q9BV57	BMP4_HUMAN	ENST00000245451,ENST00000417573,ENST00000558984,ENST00000559087	P12644	WNT9A WNT14	WNT9A_HUMAN	O14904
	ADIG	Q0VDE8	PSPN_HUMAN	ENST00000245810	O60542	WNT9B WNT14B WNT15 UNQ6973/PRO21956	WNT9B_HUMAN	O14905
	ADIPOQ	Q15848	CSTL1_HUMAN	ENST00000246020,ENST00000347397	Q9H114	LECT2	LECT2_HUMAN	O14960
	ADM	P35318	HIS1_HUMAN	ENST00000246896,ENST00000511674	P15515	PDZD2 AIPC KIAA0300 PDZK3	PDZD2_HUMAN	O15018
	ADM2	Q7Z4H4	DNAS1_HUMAN	ENST00000246949,ENST00000407479	P24855	SEMA3E KIAA0331 SEMAH	SEM3E_HUMAN	O15041
	ADM5	C9JUS6	GDF1_HUMAN	ENST00000247005	P27539	ADAMTS3 KIAA0366	ATS3_HUMAN	O15072
	ADPGK	Q9BRR6	SDF2_HUMAN	ENST00000247020	Q99470	ANGPT2	ANGP2_HUMAN	O15123
	ADPRHL2	Q9NX46	ISK2_HUMAN	ENST00000248701	P20155	NPFF	NPFF_HUMAN	O15130
	AEBP1	Q8IUX7	VGF_HUMAN	ENST00000249330,ENST00000445482	O15240	EPHB6	EPHB6_HUMAN	O15197
	AFM	P43652	ISLR_HUMAN	ENST00000249842,ENST00000395118	O14498	ADAMDEC1	ADEC1_HUMAN	O15204
	AFP	P02771	CLC11_HUMAN	ENST00000250340	Q9Y240	LAMA5 KIAA0533 KIAA1907	LAMA5_HUMAN	O15230
	AGA	P20933	KLK9_HUMAN	ENST00000544410,ENST00000594211	Q9UKQ9	MATN3	MATN3_HUMAN	O15232
	AGER	Q15109	CMA1_HUMAN	ENST00000250378	P23946	VGF	VGF_HUMAN	O15240
	AGK	Q53H12	INS_HUMAN	ENST00000250971,ENST00000381330,ENST00000397262	P01308	DEFB4A DEFB102 DEFB2 DEFB4; DEFB4B	DFB4A_HUMAN	O15263
	AGPS	O00116	ANGL8_HUMAN	ENST00000252453	Q6UXH0	CHAD SLRR4A	CHAD_HUMAN	O15335
	AGR2	O95994	APOE_HUMAN	ENST00000252486	P02649	TMPRSS2 PRSS10	TMPS2_HUMAN	O15393
	AGR3	Q8TD06	NCAN_HUMAN	ENST00000252575	O14594	CCL25 SCYA25 TECK	CCL25_HUMAN	O15444
	AGRN	O00468	EPO_HUMAN	ENST00000252723	P01588	CCL16 ILINCK NCC4 SCYA16	CCL16_HUMAN	O15467
	AGRP	O00253	GDF15_HUMAN	ENST00000252809	Q99988	PLA2G10	PA2GX_HUMAN	O15496
	AGT	P01019	CCL25_HUMAN	ENST00000253451,ENST00000390669	O15444	FGF10	FGF10_HUMAN	O15520
	AGTPBP1	Q9UPW5	FA12_HUMAN	ENST00000253496	P00748	RS1 XLRS1	XLRS1_HUMAN	O15537
	AGTRAP	Q6RW13	HPLN2_HUMAN	ENST00000255039	Q9GZV7	PLXNB1 KIAA0407 PLXN5 SEP	PLXB1_HUMAN	O43157
	AHCYL2	Q96HN2	CH3L1_HUMAN	ENST00000255409	P36222	ADAM12 MLTN UNQ346/PRO545	ADA12_HUMAN	O43184
	AHSG	P02765	REG4_HUMAN	ENST00000256585,ENST00000354219	Q9BYZ8	KLK10 NES1 PRSSL1	KLK10_HUMAN	O43240
	AIG1	Q9NVV5	FHR5_HUMAN	ENST00000256785	Q9BXR6	SPINT1 HAI1 UNQ223/PRO256	SPIT1_HUMAN	O43278
	AK4	P27144	ATS8_HUMAN	ENST00000257359	Q9UP79	FGF16	FGF16_HUMAN	O43320
	AKAP10	O43572	HLPDA_HUMAN	ENST00000257696,ENST00000435296	Q9Y5L2	DHH	DHH_HUMAN	O43323
	AKR1C1	Q04828	GDF11_HUMAN	ENST00000257868	O95390	COCH COCH5B2 UNQ257/PRO294	COCH_HUMAN	O43405
	ALAS2	P22557	PADC1_HUMAN	ENST00000258083	Q9BSG0	PROM1 PROML1 MSTP061	PROM1_HUMAN	O43490
	ALB	P02768	IL1RA_HUMAN	ENST00000259206,ENST00000361779,ENST00000409052	P18510	GNRH2	GON2_HUMAN	O43555
	ALDH9A1	P49189	A1AG1_HUMAN	ENST00000259396	P02763	PI15 CRISP8 P25TI	PI15_HUMAN	O43692
	ALDOA	P04075	NOV_HUMAN	ENST00000259526	P48745	SIGLEC6 CD33L CD33L1 OBBP1	SIGL6_HUMAN	O43699
	ALG1	Q9BT22	CCL27_HUMAN	ENST00000259631	Q9Y4X3	HYAL3 LUCA3	HYAL3_HUMAN	O43820
	ALG9	Q9H6U8	CDSN_HUMAN	ENST00000259726,ENST00000418599,ENST00000445893,ENST00000457875	Q15517	ANGPTL7 CDT6 UNQ313/PRO356	ANGL7_HUMAN	O43827
	ALKAL1	Q6UXT8	PS1C2_HUMAN	ENST00000259845,ENST00000383530,ENST00000413924,ENST00000416027,ENST00000422316,ENST00000458589	Q9UIG4	CALU	CALU_HUMAN	O43852
	ALKAL2	Q6UX46	CF015_HUMAN	ENST00000259870,ENST00000383532,ENST00000412706,ENST00000427005,ENST00000440933,ENST00000452899	Q6UXA7	EDIL3 DEL1	EDIL3_HUMAN	O43854
	ALKBH1	Q13686	DDR1_HUMAN	ENST00000259875,ENST00000324771,ENST00000376567,ENST00000376568,ENST00000376569,ENST00000376570,ENST00000376575,ENST00000383377,ENST00000400410,ENST00000400411,ENST00000400414,ENST00000400486,ENST00000400488,ENST00000400489,ENST00000400491,ENST00000400492,ENST00000412329,ENST00000415092,ENST00000418800,ENST00000419412,ENST00000421229,ENST00000427053,ENST00000429699,ENST00000430933,ENST00000449518…	Q08345	CD5L API6 UNQ203/PRO229	CD5L_HUMAN	O43866
	ALKBH5	Q6P6C2	GGH_HUMAN	ENST00000260118	Q92820	TLL1 TLL	TLL1_HUMAN	O43897
	ALPI	P09923	MMP7_HUMAN	ENST00000260227	P09237	VEGFD FIGF	VEGFD_HUMAN	O43915
	ALPL	P05186	CGRE1_HUMAN	ENST00000260595,ENST00000312734,ENST00000402394,ENST00000402550,ENST00000405600	Q99674	CXCL13 BCA1 BLC SCYB13	CXL13_HUMAN	O43927
	ALPP	P05187	EPYC_HUMAN	ENST00000261172	Q99645	AKR1B10 AKR1B11	AK1BA_HUMAN	O60218
	ALPPL2	P10696	LYSC_HUMAN	ENST00000261267	P61626	TMPRSS11D HAT	TM11D_HUMAN	O60235
	AMBN	Q9NP70	LIPE_HUMAN	ENST00000261292	Q9Y5X9	FGF17 UNQ161/PRO187	FGF17_HUMAN	O60258
	AMBP	P02760	PZP_HUMAN	ENST00000261336	P20742	KLK8 NRPN PRSS19 TADG14 UNQ283/PRO322	KLK8_HUMAN	O60259
	AMELX	Q99217	VWF_HUMAN	ENST00000261405	P04275	GDF9	GDF9_HUMAN	O60383
	AMELY	Q99218	THSD4_HUMAN	ENST00000261862,ENST00000355327,ENST00000357769	Q6ZMP0	NRP2 VEGF165R2	NRP2_HUMAN	O60462
	AMH	P03971	FBN2_HUMAN	ENST00000262464,ENST00000508053	P35556	DSCAM	DSCAM_HUMAN	O60469
	AMPD1	P23109	KALM_HUMAN	ENST00000262648	P23352	SORBS3 SCAM1	VINEX_HUMAN	O60504
	AMTN	Q6UX39	FBLN1_HUMAN	ENST00000262722,ENST00000327858,ENST00000340923,ENST00000442170	P23142	PSPN	PSPN_HUMAN	O60542
	AMY1A	P04745	TIMP2_HUMAN	ENST00000262768	P16035	GREM1 CKTSF1B1 DAND2 DRM PIG2	GREM1_HUMAN	O60565
	AMY2A	P04746	MYDGF_HUMAN	ENST00000262947	Q969H8	SPINK4	ISK4_HUMAN	O60575
	AMY2B	P19961	A1BG_HUMAN	ENST00000263100	P04217	FCMR FAIM3 TOSO	FAIM3_HUMAN	O60667
	ANG	P03950	LCN1_HUMAN	ENST00000263598,ENST00000371781	P31025	CST8 CRES	CST8_HUMAN	O60676
	ANGEL1	Q9UNK9	IL7_HUMAN	ENST00000263851,ENST00000520269	P13232	SRPX2 SRPUL	SRPX2_HUMAN	O60687
	ANGPT1	Q15389	GNLY_HUMAN	ENST00000263863,ENST00000409696	P22749	ZG16	ZG16_HUMAN	O60844
	ANGPT2	O15123	LOXL3_HUMAN	ENST00000264094,ENST00000393937	P58215	MMP20	MMP20_HUMAN	O60882
	ANGPT4	Q9Y264	LAMC2_HUMAN	ENST00000264144,ENST00000493293	Q13753	KERA SLRR2B	KERA_HUMAN	O60938
	ANGPTL1	O95841	IL21_HUMAN	ENST00000264497	Q9HBE4	FCGR3B CD16B FCG3 FCGR3 IGFR3	FCG3B_HUMAN	O75015
	ANGPTL2	Q9UKU9	GRAM_HUMAN	ENST00000264553	P51124	ADAM23 MDC3	ADA23_HUMAN	O75077
	ANGPTL3	Q9Y5C1	IL11_HUMAN	ENST00000264563,ENST00000585513	P20809	SLIT1 KIAA0813 MEGF4 SLIL1	SLIT1_HUMAN	O75093
	ANGPTL4	Q9BY76	SPI2_HUMAN	ENST00000264677,ENST00000461846,ENST00000471111,ENST00000476257	O75830	SLIT3 KIAA0814 MEGF5 SLIL2 UNQ691/PRO1336	SLIT3_HUMAN	O75094
	ANGPTL5	Q86XS5	COLI_HUMAN	ENST00000264708,ENST00000380794,ENST00000395826,ENST00000405623	P01189	MEGF6 EGFL3 KIAA0815	MEGF6_HUMAN	O75095
	ANGPTL6	Q8NI99	CO5A3_HUMAN	ENST00000264828	P25940	ADAMTS4 KIAA0688 UNQ769/PRO1563	ATS4_HUMAN	O75173
	ANGPTL7	O43827	AMBP_HUMAN	ENST00000265132	P02760	NPIPB7 NPIPL1	NPIB7_HUMAN	O75200
	ANGPTL8	Q6UXH0	FSTL4_HUMAN	ENST00000265342	Q6MZW2	SEMA7A CD108 SEMAL	SEM7A_HUMAN	O75326
	ANK1	P16157	WNT2_HUMAN	ENST00000265441	P09544	CILP UNQ602/PRO1188	CILP1_HUMAN	O75339
	ANKDD1A	Q495B1	MOTI_HUMAN	ENST00000266003,ENST00000430124,ENST00000507738	P12872	ENTPD6 CD39L2 IL6ST2	ENTP6_HUMAN	O75354
	ANKRD54	Q6NXT1	HYAL1_HUMAN	ENST00000266031,ENST00000320295,ENST00000395143,ENST00000395144,ENST00000447605	Q12794	ENTPD5 CD39L4 PCPH	ENTP5_HUMAN	O75356
	ANKRD60	Q9BZ19	INHBE_HUMAN	ENST00000266646	P58166	TULP3 TUBL3	TULP3_HUMAN	O75386
	ANO7	Q6IWH7	LUM_HUMAN	ENST00000266718	P51884	TECTA	TECTA_HUMAN	O75443
	ANOS1	P23352	KERA_HUMAN	ENST00000266719	O60938	USH2A	USH2A_HUMAN	O75445
	ANTXR1	Q9H6X2	DHH_HUMAN	ENST00000266991	O43323	CRLF1 UNQ288/PRO327	CRLF1_HUMAN	O75462
	AOAH	P28039	NPFF_HUMAN	ENST00000267017	O15130	GPC4 UNQ474/PRO937	GPC4_HUMAN	O75487
	AOC1	P19801	CBLN3_HUMAN	ENST00000267406	Q6UW01	CA11 CARP2 UNQ211/PRO237	CAH11_HUMAN	O75493
	AOC2	O75106	MFGM_HUMAN	ENST00000268150,ENST00000566497	Q08431	PGLYRP1 PGLYRP PGRP TNFSF3L SBBI68 UNQ639/PRO1269	PGRP1_HUMAN	O75594
	AOC3	Q16853	POLS2_HUMAN	ENST00000268281,ENST00000418068,ENST00000569305	Q5K4E3	CLEC3A CLECSF1 UNQ700/PRO1345	CLC3A_HUMAN	O75596
	APBB1	O00213	ASGR1_HUMAN	ENST00000269299	P07306	LEFTY1 LEFTB LEFTYB UNQ278/PRO317	LFTY1_HUMAN	O75610
	APCDD1	Q8J025	IBP4_HUMAN	ENST00000269593	P22692	CREG1 CREG UNQ727/PRO1409	CREG1_HUMAN	O75629
	APCS	P02743	TIP39_HUMAN	ENST00000270631	Q96A98	FCN3 FCNH HAKA1	FCN3_HUMAN	O75636
	APELA	P0DMC3	IGLO5_HUMAN	ENST00000270642	A6NGN9	SCRG1 UNQ390/PRO725	SCRG1_HUMAN	O75711
	APLN	Q9ULZ1	PROK1_HUMAN	ENST00000271331	P58294	GPX5	GPX5_HUMAN	O75715
	APLP2	Q06481	ATL4_HUMAN	ENST00000271643,ENST00000369038,ENST00000369039,ENST00000369041	Q6UY14	CRTAP CASP	CRTAP_HUMAN	O75718
	APOA1	P02647	LFTY1_HUMAN	ENST00000272134	O75610	SERPINI2 MEPI PI14	SPI2_HUMAN	O75830
	APOA2	P02652	UCN2_HUMAN	ENST00000273610	Q96RP3	ATRN KIAA0548 MGCA	ATRN_HUMAN	O75882
	APOA4	P06727	SFRP2_HUMAN	ENST00000274063	Q96HF1	TNFSF13 APRIL TALL2 ZTNF2 UNQ383/PRO715	TNF13_HUMAN	O75888
	APOA5	Q6Q788	LECT2_HUMAN	ENST00000274507	O14960	MMP23A MMP21; MMP23B MMP21 MMP22	MMP23_HUMAN	O75900
	APOB	P04114	IL9_HUMAN	ENST00000274520	P15248	LYZL6 LYC1 UNQ754/PRO1485	LYZL6_HUMAN	O75951
	APOC1	P02654	FGF18_HUMAN	ENST00000274625	O76093	C1QL1 C1QRF CRF CTRP14	C1QRF_HUMAN	O75973
	APOC2	P02655	VWDE_HUMAN	ENST00000275358	Q8N2E2	SCGN SECRET	SEGN_HUMAN	O76038
	APOC3	P02656	ATL1_HUMAN	ENST00000276935,ENST00000327883,ENST00000380548,ENST00000380566	Q8N6G6	STC2	STC2_HUMAN	O76061
	APOC4	P55056	NOE1_HUMAN	ENST00000277415,ENST00000392991	Q99784	WISP2 CCN5 CT58 CTGFL UNQ228/PRO261	WISP2_HUMAN	O76076
	APOD	P05090	NGAL_HUMAN	ENST00000277480,ENST00000373017	P80188	FGF18 UNQ420/PRO856	FGF18_HUMAN	O76093
	APOE	P02649	LCN9_HUMAN	ENST00000277526	Q8WX39	CST7	CYTF_HUMAN	O76096
	APOF	Q13790	SAA4_HUMAN	ENST00000278222	P35542	ECM2	ECM2_HUMAN	O94769
	APOH	P02749	UTER_HUMAN	ENST00000278282	P11684	SLIT2 SLIL3	SLIT2_HUMAN	O94813
	APOL1	O14791	IC1_HUMAN	ENST00000278407,ENST00000378323	P05155	DKK1 UNQ492/PRO1008	DKK1_HUMAN	O94907
	APOL3	O95236	OOSP2_HUMAN	ENST00000278855	Q86WS3	ENDOD1 KIAA0830	ENDD1_HUMAN	O94919
	APOM	O95445	GPHA2_HUMAN	ENST00000279168,ENST00000533257	Q96T91	SOGA1 C20orf117 KIAA0889 SOGA	SOGA1_HUMAN	O94964
	APOOL	Q6UXV4	MMP10_HUMAN	ENST00000279441	P09238	SEMA3D UNQ760/PRO1491	SEM3D_HUMAN	O95025
	ARCN1	P48444	MIA2_HUMAN		Q96PC5	PRSS23 ZSIG13 UNQ270/PRO307	PRS23_HUMAN	O95084
	ARFIP2	P53365	PRS23_HUMAN	ENST00000280258	O95084	TNFSF15 TL1 VEGI	TNF15_HUMAN	O95150
	ARHGAP36	Q6ZRI8	CRIM1_HUMAN	ENST00000280527	Q9NZV1	NXPH2 NPH2	NXPH2_HUMAN	O95156
	ARHGAP45	Q92619	SPRL1_HUMAN	ENST00000282470,ENST00000418378	Q14515	NXPH3 KIAA1159 NPH3 UNQ687/PRO1327	NXPH3_HUMAN	O95157
	ARHGAP6	O43182	DMP1_HUMAN	ENST00000282479,ENST00000339673	Q13316	NXPH4 NPH4 UNQ1928/PRO4403	NXPH4_HUMAN	O95158
	ARL16	Q0P5N6	BMP3_HUMAN	ENST00000282701	P12645	WISP1 CCN4	WISP1_HUMAN	O95388
	ARMC5	Q96C12	CBPB1_HUMAN	ENST00000282957,ENST00000491148	P15086	WISP3 CCN6 UNQ462/PRO790/PRO956	WISP3_HUMAN	O95389
	ARNTL	O00327	LY96_HUMAN	ENST00000284818,ENST00000518893	Q9Y6Y9	GDF11 BMP11	GDF11_HUMAN	O95390
	ARSA	P15289	ATS5_HUMAN	ENST00000284987	Q9UNA0	BMP10	BMP10_HUMAN	O95393
	ARSB	P15848	DKK2_HUMAN	ENST00000285311	Q9UBU2	UTS2 UNQ525/PRO1068	UTS2_HUMAN	O95399
	ARSE	P51690	MA2B2_HUMAN	ENST00000285599	Q9Y2E5	TNFRSF6B DCR3 TR6 UNQ186/PRO212	TNF6B_HUMAN	O95407
	ARSG	Q96EG1	OTOAN_HUMAN	ENST00000286149,ENST00000388958	Q7RTW8	PAPLN UNQ2420/PRO4977	PPN_HUMAN	O95428
	ARSI	Q5FYB1	WIF1_HUMAN	ENST00000286574	Q9Y5W5	APOM G3A NG20 HSPC336	APOM_HUMAN	O95445
	ARSK	Q6UWY0	NODAL_HUMAN	ENST00000287139	Q96S42	ADAMTS2 PCINP PCPNI	ATS2_HUMAN	O95450
	ART3	Q13508	LYZL4_HUMAN	ENST00000287748,ENST00000441172	Q96KX0	MATN4	MATN4_HUMAN	O95460
	ART4	Q93070	TIMP4_HUMAN	ENST00000287814	Q99727	GNAS GNAS1	GNAS3_HUMAN	O95467
	ART5	Q96L15	CL18A_HUMAN	ENST00000288040,ENST00000393701,ENST00000568461	A5D8T8	NTN1 NTN1L	NET1_HUMAN	O95631
	ARTN	Q5T4W7	STC1_HUMAN	ENST00000290271	P52823	LY86 MD1	LY86_HUMAN	O95711
	ASAH1	Q13510	PGRP3_HUMAN	ENST00000290722	Q96LB9	CXCL14 MIP2G NJAC SCYB14 PSEC0212 UNQ240/PRO273	CXL14_HUMAN	O95715
	ASAH2	Q9NR71	PIP_HUMAN	ENST00000291009	P12273	FGF19 UNQ334/PRO533	FGF19_HUMAN	O95750
	ASCL1	P50553	TFF2_HUMAN	ENST00000291526	Q03403	IL33 C9orf26 IL1F11 NFHEV	IL33_HUMAN	O95760
	ASIP	P42127	FCN2_HUMAN	ENST00000291744,ENST00000350339	Q15485	CER1 DAND4	CER1_HUMAN	O95813
	ASPN	Q9BXN1	GPC2_HUMAN	ENST00000292377	Q8N158	ANGPTL1 ANG3 ANGPT3 ARP1 PSEC0154 UNQ162/PRO188	ANGL1_HUMAN	O95841
	ASTL	Q6HA08	LY6K_HUMAN	ENST00000292430,ENST00000519387	Q17RY6	OLFM2 NOE2	NOE2_HUMAN	O95897
	ATAD5	Q96QE3	PGRP2_HUMAN	ENST00000292609,ENST00000340880	Q96PD5	EPPIN SPINLW1 WAP7 WFDC7	EPPI_HUMAN	O95925
	ATAT1	Q5SQI0	DCD_HUMAN	ENST00000293371,ENST00000456047,ENST00000546807	P81605	ITGBL1 OSCP TIED	ITGBL_HUMAN	O95965
	ATG2A	Q2TAZ0	WNT1_HUMAN	ENST00000293549	P04628	EFEMP2 FBLN4 UNQ200/PRO226	FBLN4_HUMAN	O95967
	ATG5	Q9H1Y0	PRS33_HUMAN	ENST00000293851,ENST00000570702	Q8NF86	SCGB1D1 LIPHA LPNA	SG1D1_HUMAN	O95968
	ATMIN	O43313	DRAXI_HUMAN	ENST00000294485	Q8NBI3	SCGB1D2 LIPHB LPNB	SG1D2_HUMAN	O95969
	ATP13A1	Q9HD20	OLM2B_HUMAN	ENST00000294794	Q68BL8	LGI1 EPT UNQ775/PRO1569	LGI1_HUMAN	O95970
	ATP5F1	P24539	FCG3B_HUMAN	ENST00000294800,ENST00000367964	O75015	BMP15 GDF9B	BMP15_HUMAN	O95972
	ATP6AP1	Q15904	INHBB_HUMAN	ENST00000295228	P09529	AGR2 AG2 UNQ515/PRO1030	AGR2_HUMAN	O95994
	ATP6AP2	O75787	BOLA3_HUMAN	ENST00000295326	Q53S33	IL18BP	I18BP_HUMAN	O95998
	ATPAF1	Q5TC12	BMP10_HUMAN	ENST00000295379	O95393	NAPSA NAP1 NAPA	NAPSA_HUMAN	O96009
	AUH	Q13825	CO6A3_HUMAN	ENST00000295550,ENST00000353578,ENST00000392003,ENST00000392004,ENST00000409809,ENST00000472056	P12111	WNT11	WNT11_HUMAN	O96014
	AVP	P01185	PROK2_HUMAN	ENST00000295619,ENST00000353065	Q9HC23	CP	CERU_HUMAN	P00450
	AXIN2	Q9Y2T1	RETNB_HUMAN	ENST00000295755	Q9BQ08	F8 F8C	FA8_HUMAN	P00451
	AZGP1	P25311	FBLN2_HUMAN	ENST00000295760,ENST00000404922,ENST00000492059	P98095	F13A1 F13A	F13A_HUMAN	P00488
	AZU1	P20160	NEUS_HUMAN	ENST00000295777,ENST00000446050	Q99574	EGFR ERBB ERBB1 HER1	EGFR_HUMAN	P00533
	B2M	P61769	ALBU_HUMAN	ENST00000295897	P02768	LALBA LYZL7	LALBA_HUMAN	P00709
	B3GALNT1	O75752	PTX3_HUMAN	ENST00000295927	P26022	F2	THRB_HUMAN	P00734
	B3GALNT2	Q8NCR0	PLF4_HUMAN	ENST00000296029	P02776	HP	HPT_HUMAN	P00738
	B3GALT1	Q9Y5Z6	TETN_HUMAN	ENST00000296130	P05452	HPR	HPTR_HUMAN	P00739
	B3GALT4	O96024	LIPH_HUMAN	ENST00000296252	Q8WWY8	F9	FA9_HUMAN	P00740
	B3GALT5	Q9Y2C3	MUCEN_HUMAN	ENST00000296420,ENST00000305864,ENST00000511970	Q9ULC0	F10	FA10_HUMAN	P00742
	B3GALT6	Q96L58	CART_HUMAN	ENST00000296777	Q16568	CFD DF PFD	CFAD_HUMAN	P00746
	B3GAT3	O94766	IL3_HUMAN	ENST00000296870	P08700	PLG	PLMN_HUMAN	P00747
	B3GLCT	Q6Y288	LEAP2_HUMAN	ENST00000296877	Q969E1	F12	FA12_HUMAN	P00748
	B3GNT3	Q9Y2A9	SHH_HUMAN	ENST00000297261	Q15465	PLAU	UROK_HUMAN	P00749
	B3GNT4	Q9C0J1	CO1A2_HUMAN	ENST00000297268	P08123	PLAT	TPA_HUMAN	P00750
	B3GNT6	Q6ZMB0	DEF4_HUMAN	ENST00000297435	P12838	CFB BF BFD	CFAB_HUMAN	P00751
	B3GNT7	Q8NFL0	DEF6_HUMAN	ENST00000297436	Q01524	REN	RENI_HUMAN	P00797
	B3GNT8	Q67FW5	DEFB1_HUMAN	ENST00000297439	P60022	ADA ADA1	ADA_HUMAN	P00813
	B3GNT9	Q6UX72	SG11B_HUMAN	ENST00000297498,ENST00000317900,ENST00000458665	Q08648	OAS1 OIAS	OAS1_HUMAN	P00973
	B4GALNT1	Q00973	VSTM4_HUMAN	ENST00000298454	Q8IW00	SPINK1 PSTI	ISK1_HUMAN	P00995
	B4GALNT3	Q6L9W6	RNAS7_HUMAN	ENST00000298690,ENST00000481538	Q9H1E1	SERPINC1 AT3 PRO0309	ANT3_HUMAN	P01008
	B4GALNT4	Q76KP1	LIPC_HUMAN	ENST00000299022,ENST00000356113	P11150	SERPINA1 AAT PI PRO0684 PRO2209	A1AT_HUMAN	P01009
	B4GALT4	O60513	CO2_HUMAN	ENST00000299367,ENST00000375510,ENST00000383362,ENST00000411803,ENST00000413548,ENST00000416252,ENST00000448206	P06681	SERPINA3 AACT GIG24 GIG25	AACT_HUMAN	P01011
	B4GALT5	O43286	A2ML1_HUMAN	ENST00000299698	A8K2U0	AGT SERPINA8	ANGT_HUMAN	P01019
	B4GALT6	Q9UBX8	MMP3_HUMAN	ENST00000299855	P08254	A2M CPAMD5 FWP007	A2MG_HUMAN	P01023
	B4GAT1	O43505	CO6A2_HUMAN	ENST00000300527,ENST00000310645,ENST00000397763,ENST00000409416	P12110	C3 CPAMD1	CO3_HUMAN	P01024
	B9D1	Q9UPM9	MMP26_HUMAN	ENST00000300762,ENST00000380390	Q9NRE1	C5 CPAMD4	CO5_HUMAN	P01031
	BACE2	Q9Y5Z0	LAIR2_HUMAN	ENST00000301202,ENST00000351841	Q6ISS4	TIMP1 CLGI TIMP	TIMP1_HUMAN	P01033
	BCAM	P50895	NEUFC_HUMAN	ENST00000301391,ENST00000575251,ENST00000577075	Q8WUJ1	CST3	CYTC_HUMAN	P01034
	BCAN	Q96GW7	CGB1_HUMAN	ENST00000301407	A6NKQ9	CST4	CYTS_HUMAN	P01036
	BCAP29	Q9UHQ4	CGB3_HUMAN	ENST00000301408,ENST00000357383,ENST00000448456	P0DN86	CST1	CYTN_HUMAN	P01037
	BCAR1	P56945	CGB7_HUMAN		P0DN87	KNG1 BDK KNG	KNG1_HUMAN	P01042
	BCHE	P06276	VWCE_HUMAN	ENST00000301770,ENST00000335613	Q96DN2	PDGFB PDGF2 SIS	PDGFB_HUMAN	P01127
	BCKDHB	P21953	PNOC_HUMAN	ENST00000301908	Q13519	TGFB1 TGFB	TGFB1_HUMAN	P01137
	BDNF	P23560	FIBA_HUMAN	ENST00000302053,ENST00000403106	P02671	NGF NGFB	NGF_HUMAN	P01138
	BGLAP	P02818	FIBB_HUMAN	ENST00000302068	P02675	GNRH1 GNRH GRH LHRH	GON1_HUMAN	P01148
	BGN	P21810	PCSK9_HUMAN	ENST00000302118	Q8NBP7	NPPA ANP PND	ANF_HUMAN	P01160
	BLVRB	P30043	MZB1_HUMAN	ENST00000302125,ENST00000417694	Q8WU39	OXT OT	NEU1_HUMAN	P01178
	BMP1	P13497	HTRA4_HUMAN	ENST00000302495	P83105	AVP ARVP VP	NEU2_HUMAN	P01185
	BMP10	O95393	UROM_HUMAN	ENST00000302509,ENST00000396134,ENST00000570689	P07911	POMC	COLI_HUMAN	P01189
	BMP15	O95972	C1QT4_HUMAN	ENST00000302514	Q9BXJ3	PENK	PENK_HUMAN	P01210
	BMP2	P12643	TRH_HUMAN	ENST00000302649	P20396	PDYN	PDYN_HUMAN	P01213
	BMP3	P12645	CTRB2_HUMAN	ENST00000303037	Q6GPI1	CGA	GLHA_HUMAN	P01215
	BMP4	P12644	IL13_HUMAN	ENST00000304506	P35225	TSHB	TSHB_HUMAN	P01222
	BMP6	P22004	CO3A1_HUMAN	ENST00000304636,ENST00000317840	P02461	FSHB	FSHB_HUMAN	P01225
	BMP7	P18075	ECP_HUMAN	ENST00000304639	P12724	LHB	LSHB_HUMAN	P01229
	BMP8A	Q7Z5Y6	RNAS6_HUMAN	ENST00000304677	Q93091	CGB3 CGB; CGB5; CGB8	CGB3_HUMAN	P0DN86
	BMP8B	P34820	CYTD_HUMAN	ENST00000304710	P28325	CGB7	CGB7_HUMAN	P0DN87
	BMPER	Q8N8U9	CYTT_HUMAN	ENST00000304725	P09228	PRL	PRL_HUMAN	P01236
	BNC1	Q01954	SMR3B_HUMAN	ENST00000304915,ENST00000504825	P02814	GH1	SOMA_HUMAN	P01241
	BOC	Q9BWV1	IL17D_HUMAN	ENST00000304920	Q8TAD2	GH2	SOM2_HUMAN	P01242
	BOD1	Q96IK1	REG1B_HUMAN	ENST00000305089	P48304	CSH1	CSH1_HUMAN	P0DML2
	BOLA1	Q9Y3E2	SCG2_HUMAN	ENST00000305409	P13521	CSH2	CSH2_HUMAN	P0DML3
	BPI	P17213	NPNT_HUMAN	ENST00000305572,ENST00000379987,ENST00000427316,ENST00000453617,ENST00000506666,ENST00000514622	Q6UXI9	CALCA CALC1	CALC_HUMAN	P01258
	BPIFA1	Q9NP55	PATE1_HUMAN	ENST00000305738,ENST00000437148	Q8WXA2	TG	THYG_HUMAN	P01266
	BPIFA2	Q96DR5	CCL11_HUMAN	ENST00000305869	P51671	PTH	PTHY_HUMAN	P01270
	BPIFA3	Q9BQP9	CXL10_HUMAN	ENST00000306602	P02778	GCG	GLUC_HUMAN	P01275
	BPIFB1	Q8TDL5	IGF1_HUMAN	ENST00000307046,ENST00000337514,ENST00000392904,ENST00000392905,ENST00000424202	P05019	VIP	VIP_HUMAN	P01282
	BPIFB2	Q8N4F0	PCDAA_HUMAN	ENST00000307360,ENST00000506939	Q9Y5I2	GHRH GHRF	SLIB_HUMAN	P01286
	BPIFB3	P59826	CC126_HUMAN	ENST00000307471,ENST00000409765,ENST00000410069	Q96EE4	PPY PNP	PAHO_HUMAN	P01298
	BPIFB4	P59827	CYTL1_HUMAN	ENST00000307746	Q9NRR1	NPY	NPY_HUMAN	P01303
	BPIFB6	Q8NFQ5	FBLN4_HUMAN	ENST00000307998,ENST00000531972	O95967	INS	INS_HUMAN	P01308
	BPIFC	Q8NFQ6	LTBP4_HUMAN	ENST00000308370	Q8N2S1	IGF2 PP1446	IGF2_HUMAN	P01344
	BRF1	Q92994	LYG1_HUMAN	ENST00000308528,ENST00000409448	Q8N1E2	GAST GAS	GAST_HUMAN	P01350
	BRINP1	O60477	MO2R1_HUMAN	ENST00000308611	Q8TD46	LTA TNFB TNFSF1	TNFB_HUMAN	P01374
	BRINP2	Q9C0B6	VEGFB_HUMAN	ENST00000309422,ENST00000426086	P49765	TNF TNFA TNFSF2	TNFA_HUMAN	P01375
	BRINP3	Q76B58	OLR1_HUMAN	ENST00000309539,ENST00000432556,ENST00000545927	P78380	IFNA1; IFNA13	IFNA1_HUMAN	P01562
	BSG	P35613	FCRLA_HUMAN	ENST00000309691,ENST00000349527,ENST00000367953	Q7L513	IFNA10	IFN10_HUMAN	P01566
	BSPH1	Q075Z2	CSHL_HUMAN	ENST00000309894	Q14406	IFNA7	IFNA7_HUMAN	P01567
	BST1	Q10588	KLK10_HUMAN	ENST00000309958,ENST00000358789,ENST00000391805	O43240	IFNA21	IFN21_HUMAN	P01568
	BTBD17	A6NE02	LGI4_HUMAN	ENST00000310123	Q8N135	IFNA5	IFNA5_HUMAN	P01569
	BTD	P43251	SNED1_HUMAN	ENST00000310397,ENST00000401884,ENST00000405547	Q8TER0	IFNA14	IFN14_HUMAN	P01570
	BTN2A2	Q8WVV5	LIPL_HUMAN	ENST00000311322	P06858	IFNA17	IFN17_HUMAN	P01571
	BTN3A1	O00481	WFKN2_HUMAN	ENST00000311378	Q8TEU8	IFNG	IFNG_HUMAN	P01579
	BTN3A2	P78410	HPSE_HUMAN	ENST00000311412,ENST00000405413,ENST00000509906,ENST00000512196,ENST00000513463	Q9Y251	IL1A IL1F1	IL1A_HUMAN	P01583
	BTN3A3	O00478	FGFP3_HUMAN	ENST00000311575	Q8TAT2	IL1B IL1F2	IL1B_HUMAN	P01584
	C10orf10	Q9NTK1	EDN3_HUMAN	ENST00000311585,ENST00000337938,ENST00000371028,ENST00000395654	P14138	EPO	EPO_HUMAN	P01588
	C10orf95	Q9H7T3	PRG2_HUMAN	ENST00000311862,ENST00000525955,ENST00000533605	P13727	JCHAIN IGCJ IGJ	IGJ_HUMAN	P01591
	C10orf99	Q6UWK7	CYTM_HUMAN	ENST00000312134	Q15828	CD8A MAL	CD8A_HUMAN	P01732
	C11orf1	Q9H5F2	GPRL1_HUMAN	ENST00000312442	Q6UWM5	PIGR	PIGR_HUMAN	P01833
	C11orf24	Q96F05	FGF5_HUMAN	ENST00000312465	P12034	IGHG1	IGHG1_HUMAN	P01857
	C11orf45	Q8TAV5	TMM25_HUMAN	ENST00000313236,ENST00000354064,ENST00000359862,ENST00000411589,ENST00000524725	Q86YD3	IGHG2	IGHG2_HUMAN	P01859
	C11orf94	C9JXX5	D104A_HUMAN	ENST00000314265,ENST00000316169	Q8WTQ1	IGHG3	IGHG3_HUMAN	P01860
	C12orf10	Q9HB07	DAF_HUMAN	ENST00000314754,ENST00000367064	P08174	IGHG4	IGHG4_HUMAN	P01861
	C12orf49	Q9H741	CP089_HUMAN	ENST00000315997,ENST00000472572	Q6UX73	COL1A1	CO1A1_HUMAN	P02452
	C12orf73	Q69YU5	CSH1_HUMAN	ENST00000316193	P0DML2	COL2A1	CO2A1_HUMAN	P02458
	C12orf76	Q8N812	ICOS_HUMAN	ENST00000316386	Q9Y6W8	COL3A1	CO3A1_HUMAN	P02461
	C14orf80	Q86SX3	CLUS_HUMAN	ENST00000316403,ENST00000405140,ENST00000523500	P10909	COL4A1	CO4A1_HUMAN	P02462
	C14orf93	Q9H972	INSL3_HUMAN	ENST00000317306	P51460	APOA1	APOA1_HUMAN	P02647
	C16orf89	Q6UX73	SLUR2_HUMAN	ENST00000317543	P0DP57	APOE	APOE_HUMAN	P02649
	C16orf90	A8MZG2	LYNX1_HUMAN		P0DP58	APOA2	APOA2_HUMAN	P02652
	C17orf58	Q2M2W7	A2MG_HUMAN	ENST00000318602	P01023	APOC1	APOC1_HUMAN	P02654
	C17orf67	Q0P5P2	WFKN1_HUMAN	ENST00000319070	Q96NZ8	APOC2 APC2	APOC2_HUMAN	P02655
	C17orf75	Q9HAS0	SAPL1_HUMAN	ENST00000319098	Q6NUJ1	APOC3	APOC3_HUMAN	P02656
	C17orf99	Q6UX52	TKN1_HUMAN	ENST00000319273,ENST00000346867,ENST00000350485	P20366	FGA	FIBA_HUMAN	P02671
	C18orf54	Q8IYD9	OTOSP_HUMAN	ENST00000319460,ENST00000391989	Q8NHW6	FGB	FIBB_HUMAN	P02675
	C19orf47	Q8N9M1	METRL_HUMAN	ENST00000320095,ENST00000570778,ENST00000571814	Q641Q3	FGG PRO2061	FIBG_HUMAN	P02679
	C19orf70	Q5XKP0	FGF8_HUMAN	ENST00000320185	P55075	CRP PTX1	CRP_HUMAN	P02741
	C1GALT1	Q9NS00	OLFL3_HUMAN	ENST00000320334	Q9NRN5	APCS PTX2	SAMP_HUMAN	P02743
	C1orf127	Q8N9H9	FHR1_HUMAN	ENST00000320493	Q03591	C1QA	C1QA_HUMAN	P02745
	C1orf159	Q96HA4	CPN2_HUMAN	ENST00000323830,ENST00000429275	P22792	C1QB	C1QB_HUMAN	P02746
	C1orf198	Q9H425	ISK6_HUMAN	ENST00000325630	Q6UWN8	C1QC C1QG	C1QC_HUMAN	P02747
	C1orf234	H3BTG2	TKN4_HUMAN	ENST00000326219,ENST00000334568,ENST00000352793,ENST00000398154,ENST00000436235	Q86UU9	C9	CO9_HUMAN	P02748
	C1orf54	Q8WWF1	GDNF_HUMAN	ENST00000326524	P39905	APOH B2G1	APOH_HUMAN	P02749
	C1orf56	Q9BUN1	PRNT_HUMAN		Q86SH4	LRG1 LRG	A2GL_HUMAN	P02750
	C1QA	P02745	EP3A_HUMAN	ENST00000326842	Q14507	FN1 FN	FINC_HUMAN	P02751
	C1QB	P02746	PSG3_HUMAN	ENST00000327495	Q16557	RBP4 PRO2222	RET4_HUMAN	P02753
	C1QC	P02747	CFAD_HUMAN	ENST00000327726	P00746	AMBP HCP ITIL	AMBP_HUMAN	P02760
	C1QL1	O75973	DEF3_HUMAN	ENST00000327857	P59666	ORM1 AGP1	A1AG1_HUMAN	P02763
	C1QL2	Q7Z5L3	OTOL1_HUMAN	ENST00000327928	A6NHN0	AHSG FETUA PRO2743	FETUA_HUMAN	P02765
	C1QL3	Q5VWW1	IL22_HUMAN	ENST00000328087,ENST00000538666	Q9GZX6	TTR PALB	TTHY_HUMAN	P02766
	C1QL4	Q86Z23	PAPP1_HUMAN	ENST00000328252	Q13219	ALB GIG20 GIG42 PRO0903 PRO1708 PRO2044 PRO2619 PRO2675 UNQ696/PRO1341	ALBU_HUMAN	P02768
	C1QTNF1	Q9BXJ1	RNS10_HUMAN	ENST00000328444	Q5GAN6	AFP HPAFP	FETA_HUMAN	P02771
	C1QTNF12	Q5T7M4	C1QT8_HUMAN	ENST00000328449	P60827	GC	VTDB_HUMAN	P02774
	C1QTNF2	Q9BXJ5	VMO1_HUMAN	ENST00000328739,ENST00000354194,ENST00000416307,ENST00000441199	Q7Z5L0	PPBP CTAP3 CXCL7 SCYB7 TGB1 THBGB1	CXCL7_HUMAN	P02775
	C1QTNF3	Q9BXJ4	PGCB_HUMAN	ENST00000329117	Q96GW7	PF4 CXCL4 SCYB4	PLF4_HUMAN	P02776
	C1QTNF4	Q9BXJ3	GAST_HUMAN	ENST00000329402	P01350	CXCL10 INP10 SCYB10	CXL10_HUMAN	P02778
	C1QTNF5	Q9BXJ0	MCH_HUMAN	ENST00000329406	P20382	TFRC	TFR1_HUMAN	P02786
	C1QTNF7	Q9BXJ2	NPW_HUMAN	ENST00000329610	Q8N729	TF PRO1400	TRFE_HUMAN	P02787
	C1QTNF8	P60827	SIAT6_HUMAN	ENST00000330208,ENST00000335430,ENST00000353126,ENST00000361812,ENST00000372362,ENST00000372365,ENST00000372366,ENST00000372367,ENST00000469715,ENST00000530581,ENST00000531451,ENST00000533212,ENST00000545417	Q11203	HPX	HEMO_HUMAN	P02790
	C1QTNF9	P0C862	CTHR1_HUMAN	ENST00000330295	Q96CG8	STATH	STAT_HUMAN	P02808
	C1QTNF9B	B2RNN3	AMY1_HUMAN	ENST00000330330,ENST00000370079,ENST00000370080,ENST00000370083	P04745	PRH1; PRH2	PRPC_HUMAN	P02810
	C1R	P00736	DEF5_HUMAN	ENST00000330590	Q01523	PRB2	PRB2_HUMAN	P02812
	C1RL	Q9NZP8	HIPL1_HUMAN	ENST00000330710,ENST00000357223	Q96JK4	SMR3B PBII PRL3 PROL3	SMR3B_HUMAN	P02814
	C1S	P09871	NTF3_HUMAN	ENST00000331010,ENST00000423158	P20783	BGLAP	OSTCN_HUMAN	P02818
	C2	P06681	PDGFB_HUMAN	ENST00000331163	P01127	ANG RNASE5	ANGI_HUMAN	P03950
	C21orf33	P30042	CALC_HUMAN	ENST00000331587,ENST00000396372,ENST00000469608	P01258	F11	FA11_HUMAN	P03951
	C21orf62	Q9NYP8	COL10_HUMAN	ENST00000332843	Q9Y6Z7	KLKB1 KLK3	KLKB1_HUMAN	P03952
	C22orf15	Q8WYQ4	NPB_HUMAN	ENST00000333383	Q8NG41	MMP1 CLG	MMP1_HUMAN	P03956
	C22orf46	C9J442	RES18_HUMAN	ENST00000333527	Q5W5W9	AMH MIF	MIS_HUMAN	P03971
	C2CD2	Q9Y426	CEI_HUMAN	ENST00000334000	Q86SI9	SLPI WAP4 WFDC4	SLPI_HUMAN	P03973
	C2orf40	Q9H1Z8	EMID1_HUMAN	ENST00000334018	Q96A84	C4BPA C4BP	C4BPA_HUMAN	P04003
	C2orf66	Q6UXQ4	FGF3_HUMAN	ENST00000334134	P11487	VTN	VTNC_HUMAN	P04004
	C2orf69	Q8N8R5	LYPD6_HUMAN	ENST00000334166,ENST00000409381	Q86Y78	PLA2G1B PLA2 PLA2A PPLA2	PA21B_HUMAN	P04054
	C3	P01024	TREM1_HUMAN	ENST00000334475	Q9NP99	PDGFA PDGF1	PDGFA_HUMAN	P04085
	C3orf33	Q6P1S2	CI047_HUMAN	ENST00000334490,ENST00000375851	Q6ZRZ4	RLN2	REL2_HUMAN	P04090
	C3orf58	Q8NDZ4	CO4A6_HUMAN	ENST00000334504,ENST00000372216	Q14031	APOB	APOB_HUMAN	P04114
	C4A	P0C0L4	CCKN_HUMAN	ENST00000334681,ENST00000396169,ENST00000434608	P06307	CLPS	COL_HUMAN	P04118
	C4B	P0C0L5	SPA11_HUMAN	ENST00000334708	Q86U17	CSF2 GMCSF	CSF2_HUMAN	P04141
	C4BPA	P04003	D105A_HUMAN	ENST00000334773,ENST00000335510	Q8NG35	TFF1 BCEI PS2	TFF1_HUMAN	P04155
	C4BPB	P20851	D106A_HUMAN	ENST00000335186,ENST00000335479	Q8N104	LCAT	LCAT_HUMAN	P04180
	C4orf26	Q17RF5	TOR2X_HUMAN	ENST00000336067	Q8N2E6	HRG	HRG_HUMAN	P04196
	C4orf48	Q5BLP8	IL17F_HUMAN	ENST00000336123	Q96PD4	A1BG	A1BG_HUMAN	P04217
	C5	P01031	THEM6_HUMAN	ENST00000336138	Q8WUY1	VWF F8VWF	VWF_HUMAN	P04275
	C5orf46	Q6UWT4	HYAL3_HUMAN	ENST00000336307,ENST00000359051,ENST00000450982	O43820	SHBG	SHBG_HUMAN	P04278
	C6	P13671	ANGI_HUMAN	ENST00000336811,ENST00000397990	P03950	SEMG1 SEMG	SEMG1_HUMAN	P04279
	C6orf120	Q7Z4R8	CSH2_HUMAN	ENST00000336844,ENST00000345366,ENST00000392886	P0DML3	PRB1	PRP1_HUMAN	P04280
	C6orf15	Q6UXA7	CXL14_HUMAN	ENST00000337225	O95715	WNT1 INT1	WNT1_HUMAN	P04628
	C6orf58	Q6P5S2	CO2A1_HUMAN	ENST00000337299	P02458	AMY1A AMY1; AMY1B AMY1; AMY1C AMY1	AMY1_HUMAN	P04745
	C7	P10643	TM155_HUMAN	ENST00000337677,ENST00000394394,ENST00000394396	Q4W5P6	AMY2A	AMYP_HUMAN	P04746
	C7orf57	Q8NEG2	CLUL1_HUMAN	ENST00000338387,ENST00000400606,ENST00000579494	Q15846	RLN1	REL1_HUMAN	P04808
	C7orf73	E0CX11	QPCT_HUMAN	ENST00000338415	Q16769	IFNW1	IFNW1_HUMAN	P05000
	C8A	P07357	TRYB1_HUMAN	ENST00000338844	Q15661	IFNA6	IFNA6_HUMAN	P05013
	C8B	P07358	KTDAP_HUMAN	ENST00000338897,ENST00000484218	P60985	IFNA4	IFNA4_HUMAN	P05014
	C8G	P07360	C1QT1_HUMAN	ENST00000339142,ENST00000392445,ENST00000579760,ENST00000580454,ENST00000580474,ENST00000581774,ENST00000583904	Q9BXJ1	IFNA16	IFN16_HUMAN	P05015
	C9	P02748	DB119_HUMAN	ENST00000339144,ENST00000376315,ENST00000376321	Q8N690	IGF1 IBP1	IGF1_HUMAN	P05019
	C9orf47	Q6ZRZ4	AMTN_HUMAN	ENST00000339336,ENST00000504451	Q6UX39	CHGB SCG1	SCG1_HUMAN	P05060
	CA10	Q9NS85	DMKN_HUMAN	ENST00000339686,ENST00000408915,ENST00000414866,ENST00000418261,ENST00000419602,ENST00000424570,ENST00000429837,ENST00000447113,ENST00000451297	Q6E0U4	APP A4 AD1	A4_HUMAN	P05067
	CA11	O75493	WFDC2_HUMAN	ENST00000339946,ENST00000372676	Q14508	APOD	APOD_HUMAN	P05090
	CA9	P23280	CL18B_HUMAN	ENST00000339953	Q6UXF7	S100A8 CAGA CFAG MRP8	S10A8_HUMAN	P05109
	CABLES1	Q16790	IL17_HUMAN	ENST00000340057	Q16552	INHA	INHA_HUMAN	P05111
	CABP1	Q8TDN4	UPAR_HUMAN	ENST00000340093	Q03405	IL4	IL4_HUMAN	P05112
	CACNA2D1	Q9NZU7	NECT1_HUMAN	ENST00000340882	Q15223	IL5	IL5_HUMAN	P05113
	CACNA2D4	P54289	IGFL3_HUMAN	ENST00000341415	Q6UXB1	SERPINB2 PAI2 PLANH2	PAI2_HUMAN	P05120
	CADM3	Q7Z3S7	CN093_HUMAN	ENST00000341470	Q9H972	SERPINE1 PAI1 PLANH1	PAI1_HUMAN	P05121
	CALCA	Q8N126	TRML4_HUMAN	ENST00000341495,ENST00000448827	Q6UXN2	SERPINA5 PCI PLANH3 PROCI	IPSP_HUMAN	P05154
	CALCB	P01258	FBLN5_HUMAN	ENST00000342058	Q9UBX5	SERPING1 C1IN C1NH	IC1_HUMAN	P05155
	CALCR	P06881	ISM2_HUMAN	ENST00000342219,ENST00000493585	Q6H9L7	CFI IF	CFAI_HUMAN	P05156
	CALCRL	P10092	NYX_HUMAN	ENST00000342595,ENST00000378220	Q9GZU5	F13B	F13B_HUMAN	P05160
	CALR	P30988	CO061_HUMAN	ENST00000342683	A6NNL5	ISG15 G1P2 UCRP	ISG15_HUMAN	P05161
	CALR3	Q16602	PROZ_HUMAN	ENST00000342783,ENST00000375547	P22891	FGF1 FGFA	FGF1_HUMAN	P05230
	CALU	P27797	SG1C1_HUMAN	ENST00000342878	Q8TD33	IL6 IFNB2	IL6_HUMAN	P05231
	CAMK2D	Q96L12	OX26_HUMAN	ENST00000343079	P83859	EDN1	EDN1_HUMAN	P05305
	CAMP	O43852	NET4_HUMAN	ENST00000343702,ENST00000553059	Q9HB63	SCG5 SGNE1	7B2_HUMAN	P05408
	CANX	Q13557	CO9A3_HUMAN	ENST00000343916	Q14050	REG1A PSPS PSPS1 REG	REG1A_HUMAN	P05451
	CARM1	P49913	ECM2_HUMAN	ENST00000344604,ENST00000444490	O94769	CLEC3B TNA	TETN_HUMAN	P05452
	CARNS1	Q96JM3	SN_HUMAN	ENST00000344754	Q9BZZ2	SERPINA7 TBG	THBG_HUMAN	P05543
	CARTPT	P27824	PVR_HUMAN	ENST00000344956,ENST00000403059	P15151	CSN2 CASB	CASB_HUMAN	P05814
	CASQ1	Q86X55	CATB_HUMAN	ENST00000345125,ENST00000353047,ENST00000453527,ENST00000530640,ENST00000531089,ENST00000533455,ENST00000534510	P07858	COL5A2	CO5A2_HUMAN	P05997
	CASQ2	A5YM72	MUC4_HUMAN	ENST00000346145	Q99102	BCHE CHE1	CHLE_HUMAN	P06276
	CATSPERG	Q16568	FA7_HUMAN	ENST00000346342,ENST00000375581	P08709	CCK	CCKN_HUMAN	P06307
	CBLN1	P23435	KLK8_HUMAN	ENST00000347619,ENST00000391806	O60259	GSN	GELS_HUMAN	P06396
	CBLN2	Q8IUK8	TNR25_HUMAN	ENST00000348333,ENST00000351748,ENST00000356876,ENST00000377782	Q93038	C2	CO2_HUMAN	P06681
	CBLN3	Q6UW01	ZPBP2_HUMAN	ENST00000348931	Q6X784	S100A9 CAGB CFAG MRP14	S10A9_HUMAN	P06702
	CBLN4	Q9NTU7	I22R2_HUMAN	ENST00000349184	Q969J5	APOA4	APOA4_HUMAN	P06727
	CCBE1	Q6UXH8	CD8B_HUMAN	ENST00000349455,ENST00000393761	P10966	FCER2 CD23A CLEC4J FCE2 IGEBF	FCER2_HUMAN	P06734
	CCDC112	Q8NEF3	TENA_HUMAN	ENST00000350763,ENST00000537320	P24821	GPI	G6PI_HUMAN	P06744
	CCDC129	Q6ZRS4	TSP4_HUMAN	ENST00000350881	P35443	CRH	CRF_HUMAN	P06850
	CCDC134	Q9H6E4	SG11A_HUMAN	ENST00000351436	Q6PDA7	LPL LIPD	LIPL_HUMAN	P06858
	CCDC149	Q6ZUS6	CD59_HUMAN	ENST00000351554,ENST00000395850,ENST00000415002,ENST00000426650,ENST00000437761,ENST00000445143,ENST00000527577	P13987	CALCA CALC1	CALCA_HUMAN	P06881
	CCDC3	Q9BQI4	ATL2_HUMAN	ENST00000354484,ENST00000393060	Q86TH1	SERPINE2 PI7 PN1	GDN_HUMAN	P07093
	CCDC80	Q76M96	FMOD_HUMAN	ENST00000354955	Q06828	LIPF	LIPG_HUMAN	P07098
	CCDC85A	Q96PX6	FBLN3_HUMAN	ENST00000355426,ENST00000394555	Q12805	PROS1 PROS	PROS_HUMAN	P07225
	CCDC88B	A6NC98	CSF2R_HUMAN	ENST00000355432,ENST00000355805	P15509	P4HB ERBA2L PDI PDIA1 PO4DB	PDIA1_HUMAN	P07237
	CCER2	I3L3R5	COIA1_HUMAN	ENST00000355480,ENST00000359759	P39060	KLK3 APS	KLK3_HUMAN	P07288
	CCK	P06307	A1AT_HUMAN	ENST00000355814,ENST00000393087,ENST00000393088,ENST00000402629,ENST00000404814,ENST00000437397,ENST00000440909,ENST00000448921,ENST00000449399,ENST00000489769	P01009	ASGR1 CLEC4H1	ASGR1_HUMAN	P07306
	CCL1	P22362	HPT_HUMAN	ENST00000355906,ENST00000398131,ENST00000570083	P00738	CTSD CPSD	CATD_HUMAN	P07339
	CCL11	P51671	LAMB3_HUMAN	ENST00000356082,ENST00000367030,ENST00000391911	Q13751	ANXA2 ANX2 ANX2L4 CAL1H LPC2D	ANXA2_HUMAN	P07355
	CCL13	Q99616	SAA1_HUMAN	ENST00000356524,ENST00000405158	P0DJI8	C8A	CO8A_HUMAN	P07357
	CCL14	Q16627	IL27A_HUMAN	ENST00000356897	Q8NEV9	C8B	CO8B_HUMAN	P07358
	CCL15	Q16663	GUC2A_HUMAN	ENST00000357001	Q02747	C8G	CO8G_HUMAN	P07360
	CCL16	O15467	GALP_HUMAN	ENST00000357330	Q9UBC7	PRSS1 TRP1 TRY1 TRYP1	TRY1_HUMAN	P07477
	CCL17	Q92583	APOA4_HUMAN	ENST00000357780	P06727	PRSS2 TRY2 TRYP2	TRY2_HUMAN	P07478
	CCL18	P55774	TLL2_HUMAN	ENST00000357947	Q9Y6L7	GRP	GRP_HUMAN	P07492
	CCL19	Q99731	F19A5_HUMAN	ENST00000358295	Q7Z5A7	CSN3 CASK CSN10 CSNK	CASK_HUMAN	P07498
	CCL2	P13500	CCL20_HUMAN	ENST00000358813,ENST00000409189	P78556	DCN SLRR1B	PGS2_HUMAN	P07585
	CCL20	P78556	LIPR1_HUMAN	ENST00000358834,ENST00000528052	P54315	PSAP GLBA SAP1	SAP_HUMAN	P07602
	CCL21	O00585	GON2_HUMAN	ENST00000359100,ENST00000380346,ENST00000380347	O43555	CTSB CPSB	CATB_HUMAN	P07858
	CCL22	O00626	FGF17_HUMAN	ENST00000359441	O60258	UMOD	UROM_HUMAN	P07911
	CCL23	P55773	MFAP5_HUMAN	ENST00000359478,ENST00000396549,ENST00000540087	Q13361	LAMB1	LAMB1_HUMAN	P07942
	CCL24	O00175	HPLN3_HUMAN	ENST00000359595	Q96S86	SFTPB SFTP3	PSPB_HUMAN	P07988
	CCL25	O15444	CEL2A_HUMAN	ENST00000359621	P08217	RNASE1 RIB1 RNS1	RNAS1_HUMAN	P07998
	CCL26	Q9Y258	PYY_HUMAN	ENST00000360085	P10082	MSMB PRSP	MSMB_HUMAN	P08118
	CCL27	Q9Y4X3	MATN4_HUMAN	ENST00000360607,ENST00000372754,ENST00000372756,ENST00000537548	O95460	COL1A2	CO1A2_HUMAN	P08123
	CCL28	Q9NRJ3	AOC1_HUMAN	ENST00000360937,ENST00000416793,ENST00000467291,ENST00000493429	P19801	SERPINA6 CBG	CBG_HUMAN	P08185
	CCL3	P10147	CALCA_HUMAN	ENST00000361010,ENST00000486207	P06881	CELA2A ELA2A	CEL2A_HUMAN	P08217
	CCL3L3	P16619	MEPE_HUMAN	ENST00000361056,ENST00000395102,ENST00000424957	Q9NQ76	CELA2B ELA2B	CEL2B_HUMAN	P08218
	CCL4	P13236	CO8A_HUMAN	ENST00000361249	P07357	MMP3 STMY1	MMP3_HUMAN	P08254
	CCL4L2	Q8NHW4	EGFL6_HUMAN	ENST00000361306,ENST00000380602	Q8IUX8	SOD3	SODE_HUMAN	P08294
	CCL5	P13501	GPX7_HUMAN	ENST00000361314	Q96SL4	INHBA	INHBA_HUMAN	P08476
	CCL7	P80098	AMY2B_HUMAN	ENST00000361355,ENST00000477657	P19961	MGP MGLAP GIG36	MGP_HUMAN	P08493
	CCL8	P80075	F19A3_HUMAN	ENST00000361886,ENST00000369630	Q7Z5A8	COL4A2	CO4A2_HUMAN	P08572
	CCNB1IP1	Q9NPC3	ZP4_HUMAN	ENST00000366570	Q12836	MET	MET_HUMAN	P08581
	CCNL1	Q9UK58	PRS38_HUMAN	ENST00000366757	A1L453	CFH HF HF1 HF2	CFAH_HUMAN	P08603
	CCNL2	Q96S94	LFTY2_HUMAN	ENST00000366820,ENST00000420304	O00292	FGF4 HST HSTF1 KS3	FGF4_HUMAN	P08620
	CD14	P08571	TGFB2_HUMAN	ENST00000366929,ENST00000366930	P61812	FCGR3A CD16A FCG3 FCGR3 IGFR3	FCG3A_HUMAN	P08637
	CD160	O95971	IL24_HUMAN	ENST00000367093	Q13007	SERPINF2 AAP PLI	A2AP_HUMAN	P08697
	CD164	Q04900	VIP_HUMAN	ENST00000367243,ENST00000367244	P01282	IL3	IL3_HUMAN	P08700
	CD177	Q8N6Q3	ULBP5_HUMAN	ENST00000367361	Q6H3X3	F7	FA7_HUMAN	P08709
	CD1E	P15812	FHR2_HUMAN	ENST00000367415	P36980	IGFBP1 IBP1	IBP1_HUMAN	P08833
	CD2	P06729	CFAH_HUMAN	ENST00000367429	P08603	RPSA LAMBR LAMR1	RSSA_HUMAN	P08865
	CD200	P41217	PRG4_HUMAN	ENST00000367483,ENST00000367485,ENST00000445192	Q92954	IL6R	IL6RA_HUMAN	P08887
	CD200R1	Q8TD46	QSOX1_HUMAN	ENST00000367600	O00391	NMB	NMB_HUMAN	P08949
	CD22	P20273	PAPP2_HUMAN	ENST00000367661,ENST00000367662	Q9BXP8	FGF2 FGFB	FGF2_HUMAN	P09038
	CD226	Q15762	TNFL6_HUMAN	ENST00000367721	P48023	CST2	CYTT_HUMAN	P09228
	CD24	P25063	DERM_HUMAN	ENST00000367817	Q07507	MMP7 MPSL1 PUMP1	MMP7_HUMAN	P09237
	CD276	Q5ZPR3	XCL1_HUMAN	ENST00000367818	P47992	MMP10 STMY2	MMP10_HUMAN	P09238
	CD300A	Q9UGN4	XCL2_HUMAN	ENST00000367819	Q9UBD3	CXCL1 GRO GRO1 GROA MGSA SCYB1	GROA_HUMAN	P09341
	CD300LB	A8K4G0	NECT4_HUMAN	ENST00000368012	Q96NY8	LGALS1	LEG1_HUMAN	P09382
	CD300LF	Q8TDQ1	OSTCN_HUMAN	ENST00000368272	P02818	PAEP	PAEP_HUMAN	P09466
	CD300LG	Q6UXG3	EFNA1_HUMAN	ENST00000368406,ENST00000368407	P20827	SPARC ON	SPRC_HUMAN	P09486
	CD3D	P04234	ADA12_HUMAN	ENST00000368676	O43184	INHBB	INHBB_HUMAN	P09529
	CD4	P01730	HTRA1_HUMAN	ENST00000368984	Q92743	WNT2 INT1L1 IRP	WNT2_HUMAN	P09544
	CD40	P25942	CA054_HUMAN	ENST00000369099,ENST00000369102	Q8WWF1	CSF1	CSF1_HUMAN	P09603
	CD44	P16070	LIPP_HUMAN	ENST00000369221	P16233	GIP	GIP_HUMAN	P09681
	CD48	P09326	LIPR3_HUMAN	ENST00000369230	Q17RR3	SCT	SECR_HUMAN	P09683
	CD5	P06127	TECTB_HUMAN	ENST00000369422	Q96PL2	CSF3 C17orf33 GCSF	CSF3_HUMAN	P09919
	CD55	P08174	IL9R_HUMAN	ENST00000369423	Q01113	FREM3	FREM3_HUMAN	P0C091
	CD59	P13987	NGF_HUMAN	ENST00000369512	P01138	C4A CO4 CPAMD2	CO4A_HUMAN	P0C0L4
	CD5L	O43866	PRS35_HUMAN	ENST00000369700	Q8N3Z0	C4B CO4 CPAMD3; C4B_2	CO4B_HUMAN	P0C0L5
	CD6	P30203	FNDC7_HUMAN	ENST00000370017	Q5VTL7	NPS	NPS_HUMAN	P0C0P6
	CD68	P34810	CREG1_HUMAN	ENST00000370509	O75629	SPINK8	ISK8_HUMAN	P0C7L1
	CD7	P09564	CRAC1_HUMAN	ENST00000370591,ENST00000370597	Q9NQ79	CECR9	CECR9_HUMAN	P0C854
	CD79A	P11912	CDCP2_HUMAN	ENST00000371330	Q5VXM1	C1QTNF9 C1QTNF9A UNQ6503/PRO21380	C1T9A_HUMAN	P0C862
	CD80	P33681	RET4_HUMAN	ENST00000371464,ENST00000371467	P02753	PATE4	PATE4_HUMAN	P0C8F1
	CD86	P42081	PTGDS_HUMAN	ENST00000371625	P41222	GKN3P	GKN3_HUMAN	P0CG01
	CD8A	P01732	LCN12_HUMAN	ENST00000371633	Q6JVE5	CFC1B	CFC1B_HUMAN	P0CG36
	CD8B	P10966	LCN8_HUMAN	ENST00000371688	Q6JVE9	CFC1	CFC1_HUMAN	P0CG37
	CD99	P14209	FCN1_HUMAN	ENST00000371806	O00602	MTRNR2L1	HMN1_HUMAN	P0CJ68
	CDC23	Q9UJX2	VEGFA_HUMAN	ENST00000372077,ENST00000457104,ENST00000518689,ENST00000518824,ENST00000520948,ENST00000523125,ENST00000523873,ENST00000523950	P15692	MTRNR2L2	HMN2_HUMAN	P0CJ69
	CDC40	O60508	PLAC9_HUMAN	ENST00000372263	Q5JTB6	MTRNR2L3	HMN3_HUMAN	P0CJ70
	CDC45	O75419	TNR5_HUMAN	ENST00000372285	P25942	MTRNR2L4	HMN4_HUMAN	P0CJ71
	CDCP1	Q9H5V8	MMP9_HUMAN	ENST00000372330	P14780	MTRNR2L5	HMN5_HUMAN	P0CJ72
	CDCP2	Q5VXM1	GUC2B_HUMAN	ENST00000372581	Q16661	MTRNR2L6	HMN6_HUMAN	P0CJ73
	CDH1	P12830	WFDC6_HUMAN	ENST00000372670	Q9BQY6	MTRNR2L7	HMN7_HUMAN	P0CJ74
	CDH11	P55287	SDC4_HUMAN	ENST00000372733	P31431	MTRNR2L8	HMN8_HUMAN	P0CJ75
	CDH13	P55290	CO9A2_HUMAN	ENST00000372748	Q14055	MTRNR2L9	HMN9_HUMAN	P0CJ76
	CDH17	Q12864	SEMG2_HUMAN	ENST00000372769	Q02383	MTRNR2L10	HMN10_HUMAN	P0CJ77
	CDH18	Q13634	WFD12_HUMAN	ENST00000372785	Q8WWY7	PGA4	PEPA4_HUMAN	P0DJD7
	CDH19	Q9H159	PEPC_HUMAN	ENST00000373025,ENST00000425343	P20142	PGA3	PEPA3_HUMAN	P0DJD8
	CDH23	Q9H251	PG12B_HUMAN	ENST00000373032	Q9BX93	PGA5	PEPA5_HUMAN	P0DJD9
	CDH5	P33151	PERF_HUMAN	ENST00000373209,ENST00000441259	P14222	SAA1	SAA1_HUMAN	P0DJI8
	CDHR1	Q96JP9	DKK1_HUMAN	ENST00000373970	O94907	SAA2	SAA2_HUMAN	P0DJI9
	CDHR4	A6H8M9	GDF5_HUMAN	ENST00000374369,ENST00000374372	P43026	PYY	PYY_HUMAN	P10082
	CDHR5	Q9HBB8	C1QC_HUMAN	ENST00000374637,ENST00000374639,ENST00000374640	P02747	CALCB CALC2	CALCB_HUMAN	P10092
	CDKN2A	P42771	RAGE_HUMAN	ENST00000375055,ENST00000375067,ENST00000383275,ENST00000383279,ENST00000412470,ENST00000432831,ENST00000438221,ENST00000441180,ENST00000441804,ENST00000449037,ENST00000453588,ENST00000547328,ENST00000547651,ENST00000548464,ENST00000549758,ENST00000550562,ENST00000551254,ENST00000551381,ENST00000551827	Q15109	SRGN PRG PRG1	SRGN_HUMAN	P10124
	CDNF	Q49AH0	PA2GE_HUMAN	ENST00000375116	Q9NZK7	CXCL8 IL8	IL8_HUMAN	P10145
	CDON	Q4KMG0	GLUC_HUMAN	ENST00000375497,ENST00000418842	P01275	CCL3 G0S19-1 MIP1A SCYA3	CCL3_HUMAN	P10147
	CDSN	Q15517	MFAP2_HUMAN	ENST00000375534,ENST00000375535	P55001	PRB4	PRB4_HUMAN	P10163
	CEACAM16	Q2WEN9	VWA7_HUMAN	ENST00000375688,ENST00000430726,ENST00000438415,ENST00000438725,ENST00000452329	Q9Y334	SPP1 BNSP OPN PSEC0156	OSTP_HUMAN	P10451
	CEACAM18	A8MTB9	TN13B_HUMAN	ENST00000375887,ENST00000430559	Q9Y275	TXN TRDX TRX TRX1	THIO_HUMAN	P10599
	CEACAM19	Q7Z692	CEL2B_HUMAN	ENST00000375910	P08218	TGFB3	TGFB3_HUMAN	P10600
	CEACAM5	P06731	ANFB_HUMAN	ENST00000376468	P16860	C7	CO7_HUMAN	P10643
	CEACAM7	Q14002	NMS_HUMAN	ENST00000376865	Q5H8A3	CHGA	CMGA_HUMAN	P10645
	CEACAM8	P31997	EMC10_HUMAN	ENST00000376918	Q5UCC4	PF4V1 CXCL4V1 SCYB4V1	PF4V_HUMAN	P10720
	CECR1	Q9NZK5	CYTC_HUMAN	ENST00000376925,ENST00000398409,ENST00000398411	P01034	RBP3	RET3_HUMAN	P10745
	CEL	P19835	CST9_HUMAN	ENST00000376971	Q5W186	FGF6 HST2 HSTF2	FGF6_HUMAN	P10767
	CELA2A	P08217	GABR1_HUMAN	ENST00000376977,ENST00000494877,ENST00000547410,ENST00000548767	Q9UBS5	CLU APOJ CLI KUB1 AAG4	CLUS_HUMAN	P10909
	CELA2B	P08218	GPC6_HUMAN	ENST00000377047	Q9Y625	GHR	GHR_HUMAN	P10912
	CELA3A	P09093	GPC5_HUMAN	ENST00000377067	P78333	HAPLN1 CRTL1	HPLN1_HUMAN	P10915
	CELA3B	P08861	MAMC2_HUMAN	ENST00000377182	Q7Z304	CD8B CD8B1	CD8B_HUMAN	P10966
	CEMIP	Q8WUJ3	CAH6_HUMAN	ENST00000377436,ENST00000377443	P23280	IAPP	IAPP_HUMAN	P10997
	CEP57	Q86XR8	DIA1R_HUMAN	ENST00000377934	Q9H7Y0	LAMC1 LAMB2	LAMC1_HUMAN	P11047
	CEP89	Q96ST8	CNMD_HUMAN	ENST00000377962,ENST00000448904	O75829	LIPC HTGL	LIPC_HUMAN	P11150
	CER1	O95813	CL073_HUMAN	ENST00000378090,ENST00000547945,ENST00000549478,ENST00000553183	Q69YU5	MBL2 COLEC1 MBL	MBL2_HUMAN	P11226
	CERCAM	Q5T4B2	CDNF_HUMAN	ENST00000378442	Q49AH0	PSG1 B1G1 PSBG1 PSGGA	PSG1_HUMAN	P11464
	CERS1	P27544	ITM2B_HUMAN	ENST00000378549	Q9Y287	PSG2 PSBG2	PSG2_HUMAN	P11465
	CES1	P23141	CCL7_HUMAN	ENST00000378569	P80098	FGF3 INT2	FGF3_HUMAN	P11487
	CES3	Q6UWW8	GDF9_HUMAN	ENST00000378673	O60383	CETP	CETP_HUMAN	P11597
	CES4A	Q5XG92	UCMA_HUMAN	ENST00000378681	Q8WVF2	SCGB1A1 CC10 CCSP UGB	UTER_HUMAN	P11684
	CES5A	Q6NT32	BMP2_HUMAN	ENST00000378827	P12643	SFTPC SFTP2	PSPC_HUMAN	P11686
	CETP	P11597	CCDC3_HUMAN	ENST00000378839	Q9BQI4	FGF5	FGF5_HUMAN	P12034
	CFAP65	Q6ZU64	TNR18_HUMAN	ENST00000379265,ENST00000379268	Q9Y5U5	COL11A1 COLL6	COBA1_HUMAN	P12107
	CFB	P00751	NDNF_HUMAN	ENST00000379692	Q8TB73	COL6A1	CO6A1_HUMAN	P12109
	CFC1	P0CG37	TSLP_HUMAN	ENST00000379706	Q969D9	COL6A2	CO6A2_HUMAN	P12110
	CFC1B	P0CG36	CI072_HUMAN	ENST00000379995,ENST00000379997	Q96LT7	COL6A3	CO6A3_HUMAN	P12111
	CFD	P00746	NEU2_HUMAN	ENST00000380293	P01185	F5	FA5_HUMAN	P12259
	CFDP1	Q9UEE9	UCN3_HUMAN	ENST00000380433	Q969E3	PTHLH PTHRP	PTHR_HUMAN	P12272
	CFH	P08603	SHBG_HUMAN	ENST00000380450,ENST00000416273,ENST00000441599,ENST00000575903	P04278	PIP GCDFP15 GPIP4	PIP_HUMAN	P12273
	CFHR1	Q03591	AMELX_HUMAN	ENST00000380712,ENST00000380714	Q99217	GZMA CTLA3 HFSP	GRAA_HUMAN	P12544
	CFHR2	P36980	ICAM4_HUMAN	ENST00000380770	Q14773	BMP2 BMP2A	BMP2_HUMAN	P12643
	CFHR3	Q02985	FREM1_HUMAN	ENST00000380880,ENST00000422223	Q5H8C1	BMP4 BMP2B DVR4	BMP4_HUMAN	P12644
	CFHR4	Q92496	CRLF2_HUMAN	ENST00000381566	Q9HC73	BMP3 BMP3A	BMP3_HUMAN	P12645
	CFHR5	Q9BXR6	SIRPD_HUMAN	ENST00000381623	Q9H106	RNASE3 ECP RNS3	ECP_HUMAN	P12724
	CFI	P05156	C1QT3_HUMAN	ENST00000382065	Q9BXJ4	DEFA4 DEF4	DEF4_HUMAN	P12838
	CFP	P27918	SODE_HUMAN	ENST00000382120	P08294	MLN	MOTI_HUMAN	P12872
	CGA	P01215	DB135_HUMAN	ENST00000382208	Q30KP9	IL7	IL7_HUMAN	P13232
	CGB1	A6NKQ9	DB136_HUMAN	ENST00000382209	Q30KP8	CCL4 LAG1 MIP1B SCYA4	CCL4_HUMAN	P13236
	CGB2	Q6NT52	FGFP1_HUMAN	ENST00000382333	Q14512	IFI30 GILT IP30	GILT_HUMAN	P13284
	CGB3	P0DN86	FGF9_HUMAN	ENST00000382353	P31371	BMP1 PCOLC	BMP1_HUMAN	P13497
	CGB7	P0DN87	DB125_HUMAN	ENST00000382410	Q8N687	CCL2 MCP1 SCYA2	CCL2_HUMAN	P13500
	CGREF1	Q99674	DEF1_HUMAN	ENST00000382679,ENST00000382689,ENST00000382692	P59665	CCL5 D17S136E SCYA5	CCL5_HUMAN	P13501
	CHAD	O15335	HGFA_HUMAN	ENST00000382774	Q04756	SCG2 CHGC	SCG2_HUMAN	P13521
	CHADL	Q6NUI6	MSLN_HUMAN	ENST00000382862,ENST00000545450,ENST00000563941,ENST00000566549	Q13421	NCAM1 NCAM	NCAM1_HUMAN	P13591
	CHEK2	O96017	COBA2_HUMAN	ENST00000383087,ENST00000383088,ENST00000395194,ENST00000439039,ENST00000447741,ENST00000452937,ENST00000549811,ENST00000551542	P13942	VCAN CSPG2	CSPG2_HUMAN	P13611
	CHGA	P10645	F131A_HUMAN	ENST00000383847	Q6UXB0	C6	CO6_HUMAN	P13671
	CHGB	P05060	IL20_HUMAN	ENST00000391930	Q9NYY1	OSM	ONCM_HUMAN	P13725
	CHI3L1	P36222	VNN3_HUMAN	ENST00000392393	Q9NY84	F3	TF_HUMAN	P13726
	CHI3L2	Q15782	PLA2R_HUMAN	ENST00000392771	Q13018	PRG2 MBP	PRG2_HUMAN	P13727
	CHIA	Q9BZP6	DB110_HUMAN	ENST00000393660	Q30KQ9	COL11A2	COBA2_HUMAN	P13942
	CHID1	Q9BWS9	I18BP_HUMAN	ENST00000393707	O95998	CD59 MIC11 MIN1 MIN2 MIN3 MSK21	CD59_HUMAN	P13987
	CHIT1	Q13231	PILRA_HUMAN	ENST00000394000	Q9UKJ1	EDN3	EDN3_HUMAN	P14138
	CHL1	O00533	PROS_HUMAN	ENST00000394236	P07225	MIF GLIF MMIF	MIF_HUMAN	P14174
	CHN1	P15882	CCL8_HUMAN	ENST00000394620	P80075	FOLR2	FOLR2_HUMAN	P14207
	CHPF	Q8IZ52	PCDA1_HUMAN	ENST00000394633	Q9Y5I3	PRF1 PFP	PERF_HUMAN	P14222
	CHPF2	Q9P2E5	CFAI_HUMAN	ENST00000394634	P05156	NID1 NID	NID1_HUMAN	P14543
	CHRD	Q9H2X0	SDF1_HUMAN	ENST00000395793,ENST00000395795	P48061	IDE	IDE_HUMAN	P14735
	CHRDL1	Q9BU40	ODAM_HUMAN	ENST00000396094	A1E959	IL1R1 IL1R IL1RA IL1RT1	IL1R1_HUMAN	P14778
	CHRDL2	Q6WN34	SOSD1_HUMAN	ENST00000396652	Q6X4U4	MMP9 CLG4B	MMP9_HUMAN	P14780
	CHRNA2	Q15822	CNTN4_HUMAN	ENST00000397461,ENST00000418658,ENST00000427331	Q8IWV2	LIF HILDA	LIF_HUMAN	P15018
	CHRNA5	P30532	TECT1_HUMAN	ENST00000397655,ENST00000397659,ENST00000551590	Q2MV58	CPA1 CPA	CBPA1_HUMAN	P15085
	CHRNB1	P11230	CQ067_HUMAN	ENST00000397861	Q0P5P2	CPB1 CPB PCPB	CBPB1_HUMAN	P15086
	CHRND	Q07001	RNAS4_HUMAN	ENST00000397995,ENST00000555597,ENST00000555835	P34096	PVR PVS	PVR_HUMAN	P15151
	CHST1	O43916	RNS11_HUMAN	ENST00000398008,ENST00000398009,ENST00000432835,ENST00000553849,ENST00000555841	Q8TAA1	CPN1 ACBP	CBPN_HUMAN	P15169
	CHST10	O43529	NPS_HUMAN	ENST00000398023	P0C0P6	IL9	IL9_HUMAN	P15248
	CHST11	Q9NPF2	CYTN_HUMAN	ENST00000398402	P01037	B4GALT1 GGTB2	B4GT1_HUMAN	P15291
	CHST13	Q8NET6	FAM3B_HUMAN	ENST00000398647	P58499	FOLR1 FOLR	FOLR1_HUMAN	P15328
	CHST4	Q8NCG5	PROL1_HUMAN	ENST00000399575	Q99935	ELN	ELN_HUMAN	P15502
	CHST5	Q9GZS9	ZG16_HUMAN	ENST00000400752	O60844	CSF2RA CSF2R CSF2RY	CSF2R_HUMAN	P15509
	CHST6	Q9GZX3	MASP2_HUMAN	ENST00000400898	O00187	HTN1 HIS1	HIS1_HUMAN	P15515
	CHST7	Q9NS84	C1QA_HUMAN	ENST00000402322	P02745	HTN3 HIS2	HIS3_HUMAN	P15516
	CHST8	Q9H2A9	TRFE_HUMAN	ENST00000402696	P02787	VEGFA VEGF	VEGFA_HUMAN	P15692
	CHSY1	Q86X52	CBPE_HUMAN	ENST00000402744	P16870	IGLL1 IGL1	IGLL1_HUMAN	P15814
	CHSY3	Q70JA7	PDGFA_HUMAN	ENST00000402802	P04085	ST6GAL1 SIAT1	SIAT1_HUMAN	P15907
	CHTF8	P0CG12	COL11_HUMAN	ENST00000404205	Q9BWP8	TIMP2	TIMP2_HUMAN	P16035
	CILP	O75339	LTBP1_HUMAN	ENST00000404816	Q14766	ACAN AGC1 CSPG1 MSK16	PGCA_HUMAN	P16112
	CILP2	Q8IUL8	PLGF_HUMAN	ENST00000405431	P49763	PNLIP	LIPP_HUMAN	P16233
	CKLF	Q9UBR5	MATN3_HUMAN	ENST00000407540,ENST00000421259	O15232	ABO	BGAT_HUMAN	P16442
	CKMT1A	P12532	VTM2A_HUMAN	ENST00000407838	Q8TAG5	PRLR	PRLR_HUMAN	P16471
	CLCA1	A8K7I4	MMP19_HUMAN	ENST00000409200,ENST00000552872	Q99542	CRISP2 GAPDL5 TPX1	CRIS2_HUMAN	P16562
	CLCF1	Q9UBD9	LY65B_HUMAN	ENST00000409525	Q8NDX9	CCL3L1 D17S1718 G0S19-2 SCYA3L1; CCL3L3	CL3L1_HUMAN	P16619
	CLDN15	P56746	FBLN7_HUMAN	ENST00000409667	Q53RD9	NPPB	ANFB_HUMAN	P16860
	CLDN7	O95471	NOTUM_HUMAN	ENST00000409678	Q6P988	IL7R	IL7RA_HUMAN	P16871
	CLDND1	Q9NY35	FETUA_HUMAN	ENST00000411641	P02765	BPI	BPI_HUMAN	P17213
	CLEC11A	Q9Y240	DHI1L_HUMAN	ENST00000411793,ENST00000422535,ENST00000577917	Q7Z5J1	CTRB1 CTRB	CTRB1_HUMAN	P17538
	CLEC16A	Q2KHT3	TNFB_HUMAN	ENST00000412851,ENST00000418386,ENST00000426845,ENST00000436519,ENST00000454550,ENST00000454783	P01374	LGALS3 MAC2	LEG3_HUMAN	P17931
	CLEC18A	A5D8T8	AMYP_HUMAN	ENST00000414303	P04746	IGFBP3 IBP3	IBP3_HUMAN	P17936
	CLEC18B	Q6UXF7	SAA2_HUMAN	ENST00000414546	P0DJI9	IGFBP2 BP2 IBP2	IBP2_HUMAN	P18065
	CLEC18C	Q8NCF0	SCN1B_HUMAN	ENST00000415950	Q07699	BMP7 OP1	BMP7_HUMAN	P18075
	CLEC19A	Q6UXS0	FAM3A_HUMAN	ENST00000419205	P98173	LBP	LBP_HUMAN	P18428
	CLEC20A	Q6ZU45	ADM5_HUMAN	ENST00000420022	C9JUS6	ADCYAP1	PACA_HUMAN	P18509
	CLEC2B	Q92478	PERL_HUMAN	ENST00000421678,ENST00000582328	P22079	SDC1 SDC	SDC1_HUMAN	P18827
	CLEC3A	O75596	LAMA2_HUMAN	ENST00000421865	P24043	PAM	AMD_HUMAN	P19021
	CLEC3B	P05452	IL1AP_HUMAN	ENST00000422485,ENST00000422940	Q9NPH3	EPOR	EPOR_HUMAN	P19235
	CLGN	O14967	FSTL1_HUMAN	ENST00000424703	Q12841	TNFRSF1A TNFAR TNFR1	TNR1A_HUMAN	P19438
	CLN5	O75503	EPDR1_HUMAN	ENST00000425345	Q9UM22	ORM2 AGP2	A1AG2_HUMAN	P19652
	CLPS	P04118	FINC_HUMAN	ENST00000426059	P02751	AOC1 ABP1 DAO1	AOC1_HUMAN	P19801
	CLPSL1	A2RUU4	EFNA4_HUMAN	ENST00000427683	P52798	ITIH2 IGHEP2	ITIH2_HUMAN	P19823
	CLPSL2	Q6UWE3	NELL2_HUMAN	ENST00000429094,ENST00000452445	Q99435	ITIH1 IGHEP1	ITIH1_HUMAN	P19827
	CLPX	O76031	CHID1_HUMAN	ENST00000429789	Q9BWS9	CEL BAL	CEL_HUMAN	P19835
	CLSTN3	Q9BQT9	NPB15_HUMAN	ENST00000429990	A6NHN6	CXCL2 GRO2 GROB MIP2A SCYB2	CXCL2_HUMAN	P19875
	CLU	P10909	A1AG2_HUMAN	ENST00000431067	P19652	CXCL3 GRO3 GROG SCYB3	CXCL3_HUMAN	P19876
	CLUL1	Q15846	KLK4_HUMAN	ENST00000431178	Q9Y5K2	FST	FST_HUMAN	P19883
	CMA1	P23946	PRAP1_HUMAN	ENST00000433452	Q96NZ9	PI3 WAP3 WFDC14	ELAF_HUMAN	P19957
	CMPK1	P30085	IGF2_HUMAN	ENST00000434045	P01344	AMY2B	AMY2B_HUMAN	P19961
	CNBD1	Q8NA66	SFRP4_HUMAN	ENST00000436072	Q6FHJ7	TCN1 TC1	TCO1_HUMAN	P20061
	CNDP1	Q96KN2	PATE2_HUMAN	ENST00000436890	Q6UY27	TCN2 TC2	TCO2_HUMAN	P20062
	CNOT9	Q92600	IGFL1_HUMAN	ENST00000437936	Q6UW32	PGC	PEPC_HUMAN	P20142
	CNPY2	Q9Y2B0	GL1D1_HUMAN	ENST00000441390,ENST00000539044	Q96MS3	SPINK2	ISK2_HUMAN	P20155
	CNPY3	Q9BT09	IFNA1_HUMAN	ENST00000449498	P01562	TPSB2 TPS2	TRYB2_HUMAN	P20231
	CNPY4	Q8N129	SCUB2_HUMAN	ENST00000450649	Q9NQ36	TNFRSF1B TNFBR TNFR2	TNR1B_HUMAN	P20333
	CNTFR	P26992	CYR61_HUMAN	ENST00000451137	O00622	TAC1 NKA NKNA TAC2	TKN1_HUMAN	P20366
	CNTN1	Q12860	SBSN_HUMAN	ENST00000452271,ENST00000518157	Q6UWP8	PMCH MCH	MCH_HUMAN	P20382
	CNTN2	Q02246	I17RE_HUMAN	ENST00000454190	Q8NFR9	TRH	TRH_HUMAN	P20396
	CNTN3	Q9P232	OVCH2_HUMAN	ENST00000454689	Q7RTZ1	PZP CPAMD6	PZP_HUMAN	P20742
	CNTN4	Q8IWV2	TINAL_HUMAN	ENST00000457433	Q9GZM7	OGN OIF SLRR3A	MIME_HUMAN	P20774
	CNTN5	O94779	PATE4_HUMAN	ENST00000457514	P0C8F1	NTF3	NTF3_HUMAN	P20783
	CNTNAP2	Q9UHC6	CL19A_HUMAN	ENST00000465414	Q6UXS0	EDN2	EDN2_HUMAN	P20800
	CNTNAP3	Q9BZ76	VWA1_HUMAN	ENST00000476993	Q6PCB0	IL11	IL11_HUMAN	P20809
	CNTNAP3B	Q96NU0	F19A1_HUMAN	ENST00000478136,ENST00000496687	Q7Z5A9	EFNA1 EPLG1 LERK1 TNFAIP4	EFNA1_HUMAN	P20827
	COASY	Q13057	TNR6_HUMAN	ENST00000488877,ENST00000492756,ENST00000494410	P25445	COL9A1	CO9A1_HUMAN	P20849
	COCH	O43405	DIA1_HUMAN	ENST00000495414	Q8NDZ4	C4BPB	C4BPB_HUMAN	P20851
	COG3	Q96JB2	EPGN_HUMAN	ENST00000502358,ENST00000503098,ENST00000505212,ENST00000509145,ENST00000514968	Q6UW88	COL5A1	CO5A1_HUMAN	P20908
	COL10A1	Q03692	SLIT2_HUMAN	ENST00000503823,ENST00000503837,ENST00000504154	O94813	ENDOU	ENDOU_HUMAN	P21128
	COL11A1	P12107	SEPP1_HUMAN	ENST00000506577,ENST00000511224,ENST00000514985	P49908	PTN HBNF1 NEGF1	PTN_HUMAN	P21246
	COL11A2	P13942	TICN3_HUMAN	ENST00000512648	Q9BQ16	KITLG MGF SCF	SCF_HUMAN	P21583
	COL12A1	Q99715	WISP1_HUMAN	ENST00000517423,ENST00000519433	O95388	MDK MK1 NEGF2	MK_HUMAN	P21741
	COL14A1	Q05707	SFTA3_HUMAN	ENST00000518529	P0C7M3	FGF7 KGF	FGF7_HUMAN	P21781
	COL15A1	P39059	CBPA6_HUMAN		Q8N4T0	FGFR2 BEK KGFR KSAM	FGFR2_HUMAN	P21802
	COL16A1	Q07092	PSPB_HUMAN	ENST00000519937	P07988	BGN SLRR1A	PGS1_HUMAN	P21810
	COL18A1	P39060	NRG1_HUMAN	ENST00000520502	Q02297	IBSP BNSP	SIAL_HUMAN	P21815
	COL19A1	Q14993	HIS3_HUMAN	ENST00000526767	P15516	ERBB3 HER3	ERBB3_HUMAN	P21860
	COL1A1	P02452	CRDL2_HUMAN	ENST00000528471,ENST00000534276	Q6WN34	MATN1 CMP CRTM	MATN1_HUMAN	P21941
	COL1A2	P08123	GRP_HUMAN	ENST00000529320	P07492	COMT	COMT_HUMAN	P21964
	COL20A1	Q9P218	SIA4C_HUMAN	ENST00000532243	Q11206	BMP5	BMP5_HUMAN	P22003
	COL21A1	Q96P44	RAE1E_HUMAN	ENST00000532335	Q8TD07	BMP6 VGR	BMP6_HUMAN	P22004
	COL22A1	Q8NFW1	K0319_HUMAN	ENST00000537886	Q5VV43	LPO SAPX	PERL_HUMAN	P22079
	COL24A1	Q17RW2	NPC2_HUMAN	ENST00000541064,ENST00000555619	P61916	TNXB HXBL TNX TNXB1 TNXB2 XB	TENX_HUMAN	P22105
	COL26A1	Q96A83	PROL4_HUMAN	ENST00000544994,ENST00000576999	Q16378	IL10	IL10_HUMAN	P22301
	COL27A1	Q8IZC6	PRS58_HUMAN	ENST00000547058,ENST00000552471	Q8IYP2	ACHE	ACES_HUMAN	P22303
	COL28A1	Q2UY09	OTOGL_HUMAN	ENST00000547103	Q3ZCN5	GPX3 GPXP	GPX3_HUMAN	P22352
	COL2A1	P02458	RNS12_HUMAN	ENST00000556526	Q5GAN4	CCL1 SCYA1	CCL1_HUMAN	P22362
	COL3A1	P02461	AACT_HUMAN	ENST00000556968	P01011	ENPP1 M6S1 NPPS PC1 PDNP1	ENPP1_HUMAN	P22413
	COL4A1	P02462	B2MG_HUMAN	ENST00000558401,ENST00000559916,ENST00000561424	P61769	GAL GAL1 GALN GLNN	GALA_HUMAN	P22466
	COL4A2	P08572	PINLY_HUMAN	ENST00000562255,ENST00000562365,ENST00000569031	A6NC86	IGFBP4 IBP4	IBP4_HUMAN	P22692
	COL4A3	Q01955	VWA3A_HUMAN	ENST00000563755	A6NCI4	GNLY LAG2 NKG5 TLA519	GNLY_HUMAN	P22749
	COL4A4	P53420	CRLD2_HUMAN	ENST00000564567,ENST00000569090	Q9H0B8	CPN2 ACBP	CPN2_HUMAN	P22792
	COL4A5	P29400	MMP12_HUMAN	ENST00000571244	P39900	PROZ	PROZ_HUMAN	P22891
	COL4A6	Q14031	CCER2_HUMAN	ENST00000571838	I3L3R5	MMP8 CLG1	MMP8_HUMAN	P22894
	COL5A1	P20908	GDF10_HUMAN	ENST00000580279	P55107	FBLN1 PP213	FBLN1_HUMAN	P23142
	COL5A2	P05997	SACA3_HUMAN	ENST00000580599	Q8IXA5	CA6	CAH6_HUMAN	P23280
	COL5A3	P25940	CHST9_HUMAN	ENST00000580774	Q7L1S5	ANOS1 ADMLX KAL KAL1 KALIG1	KALM_HUMAN	P23352
	COL6A1	P12109	APOC1_HUMAN	ENST00000588750,ENST00000588802	P02654	CBLN1	CBLN1_HUMAN	P23435
	COL6A2	P12110	APOC2_HUMAN	ENST00000590360	P02655	PTPRZ1 HTPZP2 PTPRZ PTPRZ2 PTPZ	PTPRZ_HUMAN	P23471
	COL6A3	P12111	LIPR2_HUMAN	ENST00000591655	P54317	BDNF	BDNF_HUMAN	P23560
	COL6A5	A8TX70	SG1C2_HUMAN	ENST00000595228	P0DMR2	NPPC CNP2	ANFC_HUMAN	P23582
	COL6A6	A6NMZ7	CLC4M_HUMAN	ENST00000597522	Q9H2X3	CMA1 CYH CYM	CMA1_HUMAN	P23946
	COL7A1	Q02388	CXL17_HUMAN	ENST00000601181	Q6UXB2	IL32 NK4 TAIF	IL32_HUMAN	P24001
	COL8A1	P27658	Total reviewed		651	LAMA2 LAMM	LAMA2_HUMAN	P24043
	COL8A2	P25067				FCAR CD89	FCAR_HUMAN	P24071
	COL9A1	P20849	Entry name	Entry data	UniProtKb (Unreviewed)	MMP11 STMY3	MMP11_HUMAN	P24347
	COL9A2	Q14055	B4DXG3_HUMAN	ENST00000296875	B4DXG3	CRHBP CRFBP	CRHBP_HUMAN	P24387
	COL9A3	Q14050	B0ZBE8_HUMAN	ENST00000376476	B0ZBE8	IL4R IL4RA 582J2.1	IL4RA_HUMAN	P24394
	COLEC10	Q9Y6Z7	Q5VZ75_HUMAN	ENST00000378800	Q5VZ75	IGFBP6 IBP6	IBP6_HUMAN	P24592
	COLEC11	Q9BWP8	J3QT06_HUMAN	ENST00000392824	J3QT06	IGFBP5 IBP5	IBP5_HUMAN	P24593
	COLGALT1	Q8NBJ5	Q13429_HUMAN	ENST00000392905	Q13429	TNC HXB	TENA_HUMAN	P24821
	COLGALT2	Q8IYK4	B1AHL2_HUMAN	ENST00000402984	B1AHL2	DNASE1 DNL1 DRNI	DNAS1_HUMAN	P24855
	COLQ	Q9Y215	B5MCC8_HUMAN	ENST00000403957	B5MCC8	COL8A2	CO8A2_HUMAN	P25067
	COMP	P49747	C9J3H3_HUMAN	ENST00000413630	C9J3H3	AZGP1 ZAG ZNGP1	ZA2G_HUMAN	P25311
	COPS6	Q7L5N1	H0Y663_HUMAN	ENST00000415567	H0Y663	LAMA1 LAMA	LAMA1_HUMAN	P25391
	COQ6	Q9Y2Z9	E7ERP7_HUMAN	ENST00000425718	E7ERP7	FAS APT1 FAS1 TNFRSF6	TNR6_HUMAN	P25445
	CORT	O00230	E7EU72_HUMAN	ENST00000427769	E7EU72	ATP5F1A ATP5A ATP5A1 ATP5AL2 ATPM	ATPA_HUMAN	P25705
	CP	P00450	E7EVH6_HUMAN	ENST00000429925	E7EVH6	COL5A3	CO5A3_HUMAN	P25940
	CPA1	P15085	C9JZZ0_HUMAN	ENST00000433069	C9JZZ0	CD40 TNFRSF5	TNR5_HUMAN	P25942
	CPA2	P48052	H0Y7L5_HUMAN	ENST00000434152	H0Y7L5	PTX3 TNFAIP5 TSG14	PTX3_HUMAN	P26022
	CPA3	P15088	E9PEV4_HUMAN	ENST00000446996	E9PEV4	MST1 D3F15S2 DNF15S2 HGFL	HGFL_HUMAN	P26927
	CPA4	Q9UI42	F8WDR1_HUMAN	ENST00000449446	F8WDR1	PON1 PON	PON1_HUMAN	P27169
	CPA6	Q8N4T0	M0R0E6_HUMAN	ENST00000474913	M0R0E6	GIF IFMH	IF_HUMAN	P27352
	CPAMD8	Q8IZJ3	C9JUI2_HUMAN	ENST00000491214	C9JUI2	GDF1	GDF1_HUMAN	P27539
	CPB1	P15086	E7EX42_HUMAN	ENST00000497792	E7EX42	COL8A1 C3orf7	CO8A1_HUMAN	P27658
	CPB2	Q96IY4	A6XGL2_HUMAN	ENST00000512523	A6XGL2	CALR CRTC	CALR_HUMAN	P27797
	CPE	P16870	E9PRT6_HUMAN	ENST00000534537	E9PRT6	CFP PFC	PROP_HUMAN	P27918
	CPM	P14384	F5H034_HUMAN	ENST00000539198	F5H034	AOAH	AOAH_HUMAN	P28039
	CPN1	P15169	F5GYM2_HUMAN	ENST00000542408	F5GYM2	SSFA2 CS1 KIAA1927 KRAP	SSFA2_HUMAN	P28290
	CPN2	P22792	F5H7Q6_HUMAN	ENST00000543071	F5H7Q6	LOX	LYOX_HUMAN	P28300
	CPO	Q8IVL8	F5H364_HUMAN	ENST00000545811	F5H364	CST5	CYTD_HUMAN	P28325
	CPQ	Q9Y646	F8W062_HUMAN	ENST00000549767	F8W062	GRN	GRN_HUMAN	P28799
	CPVL	Q9H3G5	K7ELM3_HUMAN	ENST00000591656,ENST00000601167	K7ELM3	PCSK6 PACE4	PCSK6_HUMAN	P29122
	CPXM1	Q96SM3	M0QXL9_HUMAN	ENST00000596877	M0QXL9	CTGF CCN2 HCS24 IGFBP8	CTGF_HUMAN	P29279
	CPXM2	Q8N436				EPHA3 ETK ETK1 HEK TYRO4	EPHA3_HUMAN	P29320
	CPZ	Q66K79	Total reviewed		28	COL4A5	CO4A5_HUMAN	P29400
	CR1L	Q2VPA4				IL12A NKSF1	IL12A_HUMAN	P29459
	CRB1	P82279				IL12B NKSF2	IL12B_HUMAN	P29460
	CRB2	Q5IJ48				SERPINB3 SCCA SCCA1	SPB3_HUMAN	P29508
	CREG1	O75629				SERPINA4 KST PI4	KAIN_HUMAN	P29622
	CREG2	Q8IUH2				CD40LG CD40L TNFSF5 TRAP	CD40L_HUMAN	P29965
	CRELD1	Q96HD1				NTS	NEUT_HUMAN	P30990
	CRELD2	Q6UXH1				LCN1 VEGP	LCN1_HUMAN	P31025
	CRH	P06850				S100A7 PSOR1 S100A7C	S10A7_HUMAN	P31151
	CRHBP	P24387				FGF9	FGF9_HUMAN	P31371
	CRHR1	P34998				SDC4	SDC4_HUMAN	P31431
	CRHR2	Q13324				SFN HME1	1433S_HUMAN	P31947
	CRISP1	P54107				GBP1	GBP1_HUMAN	P32455
	CRISP2	P16562				IFNA8	IFNA8_HUMAN	P32881
	CRISP3	P54108				RNASE4 RNS4	RNAS4_HUMAN	P34096
	CRISPLD2	Q9H0B8				NTF4 NTF5	NTF4_HUMAN	P34130
	CRLF1	O75462				BMP8B BMP8	BMP8B_HUMAN	P34820
	CRP	P02741				PRSS3 PRSS4 TRY3 TRY4	TRY3_HUMAN	P35030
	CRTAC1	Q9NQ79				GPC1	GPC1_HUMAN	P35052
	CRTAP	O75718				IL13 NC30	IL13_HUMAN	P35225
	CRY2	Q49AN0				SFTPD COLEC7 PSPD SFTP4	SFTPD_HUMAN	P35247
	CSAD	Q9Y600				ADM AM	ADML_HUMAN	P35318
	CSF1	P09603				THBS4 TSP4	TSP4_HUMAN	P35443
	CSF1R	P07333				SAA4 CSAA	SAA4_HUMAN	P35542
	CSF2	P04141				FBN1 FBN	FBN1_HUMAN	P35555
	CSF2RA	P15509				FBN2	FBN2_HUMAN	P35556
	CSF3	P09919				TIMP3	TIMP3_HUMAN	P35625
	CSGALNACT1	Q8TDX6				IGFALS ALS	ALS_HUMAN	P35858
	CSH1	P0DML2				FLT4 VEGFR3	VGFR3_HUMAN	P35916
	CSH2	P0DML3				KDR FLK1 VEGFR2	VGFR2_HUMAN	P35968
	CSHL1	Q14406				CHI3L1	CH3L1_HUMAN	P36222
	CSN1S1	P47710				SERPINB5 PI5	SPB5_HUMAN	P36952
	CSN2	P05814				SERPINF1 PEDF PIG35	PEDF_HUMAN	P36955
	CSN3	P07498				CFHR2 CFHL2 FHR2 HFL3	FHR2_HUMAN	P36980
	CST1	P01037				COL15A1	COFA1_HUMAN	P39059
	CST11	Q9H112				COL18A1	COIA1_HUMAN	P39060
	CST2	P09228				PLA2G5	PA2G5_HUMAN	P39877
	CST3	P01034				MMP12 HME	MMP12_HUMAN	P39900
	CST4	P01036				GDNF	GDNF_HUMAN	P39905
	CST5	P28325				IL6ST	IL6RB_HUMAN	P40189
	CST6	Q15828				THPO MGDF	TPO_HUMAN	P40225
	CST7	O76096				IL15	IL15_HUMAN	P40933
	CST8	O60676				PMEL D12S53E PMEL17 SILV	PMEL_HUMAN	P40967
	CST9	Q5W186				LEP OB OBS	LEP_HUMAN	P41159
	CST9L	Q9H4G1				WNT5A	WNT5A_HUMAN	P41221
	CSTL1	Q9H114				PTGDS PDS	PTGDS_HUMAN	P41222
	CT55	Q8WUE5				NBL1 DAN DAND1	NBL1_HUMAN	P41271
	CTBS	Q01459				FOLR3	FOLR3_HUMAN	P41439
	CTGF	P29279				ASIP AGTI AGTIL ASP	ASIP_HUMAN	P42127
	CTHRC1	Q96CG8				LIFR	LIFR_HUMAN	P42702
	CTLA4	P16410				CXCL5 ENA78 SCYB5	CXCL5_HUMAN	P42830
	CTNS	O60931				GDF5 BMP14 CDMP1	GDF5_HUMAN	P43026
	CTRB1	P17538				BTD	BTD_HUMAN	P43251
	CTRB2	Q6GPI1				NAMPT PBEF PBEF1	NAMPT_HUMAN	P43490
	CTRC	Q99895				AFM ALB2 ALBA	AFAM_HUMAN	P43652
	CTRL	P40313				MMP13	MMP13_HUMAN	P45452
	CTSA	P10619				BAG6 BAT3 G3	BAG6_HUMAN	P46379
	CTSB	P07858				CSN1S1 CASA CSN1	CASA1_HUMAN	P47710
	CTSC	P53634				LGALS7 PIG1; LGALS7B	LEG7_HUMAN	P47929
	CTSD	P07339				NPTX2	NPTX2_HUMAN	P47972
	CTSE	P14091				XDH XDHA	XDH_HUMAN	P47989
	CTSF	Q9UBX1				XCL1 LTN SCYC1	XCL1_HUMAN	P47992
	CTSG	P08311				CPA2	CBPA2_HUMAN	P48052
	CTSH	P09668				CXCL12 SDF1 SDF1A SDF1B	SDF1_HUMAN	P48061
	CTSK	P07711				REG1B PSPS2 REGL	REG1B_HUMAN	P48304
	CTSL	P43234				TFPI2	TFPI2_HUMAN	P48307
	CTSO	P43235				LEPR DB OBR	LEPR_HUMAN	P48357
	CTSS	P25774				IFNAR2 IFNABR IFNARB	INAR2_HUMAN	P48551
	CTSV	O60911				SERPINB4 PI11 SCCA2	SPB4_HUMAN	P48594
	CTSW	P56202				NMU	NMU_HUMAN	P48645
	CTSZ	Q9UBR2				MASP1 CRARF CRARF1 PRSS5	MASP1_HUMAN	P48740
	CUBN	O60494				NOV CCN3 IGFBP9 NOVH	NOV_HUMAN	P48745
	CUTA	O60888				CD97	CD97_HUMAN	P48960
	CX3CL1	P78423				SPINT3	SPIT3_HUMAN	P49223
	CXADR	P78310				COMP	COMP_HUMAN	P49747
	CXCL1	P09341				PGF PGFL PLGF	PLGF_HUMAN	P49763
	CXCL10	P02778				VEGFB VRF	VEGFB_HUMAN	P49765
	CXCL11	O14625				VEGFC	VEGFC_HUMAN	P49767
	CXCL12	P48061				FLT3LG	FLT3L_HUMAN	P49771
	CXCL13	O43927				KLK7 PRSS6 SCCE	KLK7_HUMAN	P49862
	CXCL14	O95715				GZMK TRYP2	GRAK_HUMAN	P49863
	CXCL17	Q6UXB2				SELENOP SELP SEPP1	SEPP1_HUMAN	P49908
	CXCL2	P19875				CAMP CAP18 FALL39 HSD26	CAMP_HUMAN	P49913
	CXCL3	P19876				TUB	TUB_HUMAN	P50607
	CXCL5	P42830				GZMM MET1	GRAM_HUMAN	P51124
	CXCL6	P80162				INSL3 RLF RLNL	INSL3_HUMAN	P51460
	CXCL8	P10145				MMP15	MMP15_HUMAN	P51511
	CXCL9	Q07325				MMP16 C8orf57 MMPX2	MMP16_HUMAN	P51512
	CXorf36	Q9H7Y0				GPC3 OCI5	GPC3_HUMAN	P51654
	CYB5D2	Q8WUJ1				CCL11 SCYA11	CCL11_HUMAN	P51671
	CYHR1	Q6ZMK1				LUM LDC SLRR2D	LUM_HUMAN	P51884
	CYP17A1	P05093				PRELP SLRR2A	PRELP_HUMAN	P51888
	CYP20A1	Q6UW02				EFNA4 EPLG4 LERK4	EFNA4_HUMAN	P52798
	CYP21A2	P08686				STC1 STC	STC1_HUMAN	P52823
	CYP26B1	Q9NR63				COL4A4	CO4A4_HUMAN	P53420
	CYP2A13	Q16696				COPA	COPA_HUMAN	P53621
	CYP2A6	P11509				CRISP3	CRIS3_HUMAN	P54108
	CYP2A7	P20853				PNLIPRP1 PLRP1	LIPR1_HUMAN	P54315
	CYP2B6	P20813				PNLIPRP2 PLRP2	LIPR2_HUMAN	P54317
	CYP2C18	P33260				ARSF	ARSF_HUMAN	P54793
	CYP2C19	P33261				SLURP1 ARS	SLUR1_HUMAN	P55000
	CYP2C8	P10632				MFAP2 MAGP1	MFAP2_HUMAN	P55001
	CYP2C9	P11712				APOC4	APOC4_HUMAN	P55056
	CYP2E1	P05181				PLTP	PLTP_HUMAN	P55058
	CYP2F1	P24903				FGF8 AIGF	FGF8_HUMAN	P55075
	CYP2J2	P51589				MFAP1	MFAP1_HUMAN	P55081
	CYP2R1	Q6VVX0				MFAP4	MFAP4_HUMAN	P55083
	CYP2S1	Q96SQ9				UCN	UCN1_HUMAN	P55089
	CYP2W1	Q8TAV3				INHBC	INHBC_HUMAN	P55103
	CYP46A1	Q9Y6A2				GDF10 BMP3B	GDF10_HUMAN	P55107
	CYP4F11	Q9HBI6				MANF ARMET ARP	MANF_HUMAN	P55145
	CYP4F2	P78329				GP2	GP2_HUMAN	P55259
	CYR61	O00622				LAMB2 LAMS	LAMB2_HUMAN	P55268
	CYTL1	Q9NRR1				CCL23 MIP3 MPIF1 SCYA23	CCL23_HUMAN	P55773
	D2HGDH	Q8N465				CCL18 AMAC1 DCCK1 MIP4 PARC SCYA18	CCL18_HUMAN	P55774
	DAG1	Q14118				GFER ALR HERV1 HPO	ALR_HUMAN	P55789
	DAND5	Q8N907				WNT3 INT4	WNT3_HUMAN	P56703
	DAO	P14920				WNT3A	WNT3A_HUMAN	P56704
	DAZAP2	Q15038				WNT4 UNQ426/PRO864	WNT4_HUMAN	P56705
	DBH	P09172				WNT7B	WNT7B_HUMAN	P56706
	DBNL	Q9UJU6				PRSS12	NETR_HUMAN	P56730
	DCD	P81605				EDDM3B FAM12B HE3B UNQ6412/PRO21187	EP3B_HUMAN	P56851
	DCN	P07585				SPINK7 ECG2 UNQ745/PRO1474	ISK7_HUMAN	P58062
	DDIAS	Q8IXT1				INHBE	INHBE_HUMAN	P58166
	DDOST	P39656				LOXL3 LOXL	LOXL3_HUMAN	P58215
	DDR1	Q08345				PROK1 UNQ600/PRO1186	PROK1_HUMAN	P58294
	DDR2	Q16832				ANTXR2 CMG2	ANTR2_HUMAN	P58335
	DDT	P30046				ADAMTS12 UNQ1918/PRO4389	ATS12_HUMAN	P58397
	DDX17	Q92841				NXPH1 NPH1 Nbla00697	NXPH1_HUMAN	P58417
	DDX20	Q9UHI6				FAM3B C21orf11 C21orf76 PRED44 UNQ320/PRO365	FAM3B_HUMAN	P58499
	DDX25	Q9UHL0				ADAMTS20	ATS20_HUMAN	P59510
	DDX28	Q9NUL7				DEFA1 DEF1 DEFA2 MRS; DEFA1B	DEF1_HUMAN	P59665
	DEAF1	O75398				DEFA3 DEF3	DEF3_HUMAN	P59666
	DEF8	Q6ZN54				GPX6	GPX6_HUMAN	P59796
	DEFA1	P59665				BPIFB3 C20orf185 LPLUNC3	BPIB3_HUMAN	P59826
	DEFA1B	P59666				BPIFB4 C20orf186 LPLUNC4	BPIB4_HUMAN	P59827
	DEFA3	P12838				DEFB131A DEFB131 DEFB31	D131A_HUMAN	P59861
	DEFA4	Q01523				DEFB1 BD1 HBD1	DEFB1_HUMAN	P60022
	DEFA5	Q01524				RNASE9	RNAS9_HUMAN	P60153
	DEFA6	P60022				IL2	IL2_HUMAN	P60568
	DEFB103A	P81534				C1QTNF8 UNQ5829/PRO19648	C1QT8_HUMAN	P60827
	DEFB104A	Q8WTQ1				KRTDAP KDAP UNQ467/PRO826	KTDAP_HUMAN	P60985
	DEFB105A	Q8NG35				SST	SMS_HUMAN	P61278
	DEFB106A	Q8N104				OSTN	OSTN_HUMAN	P61366
	DEFB107A	Q8IZN7				LYZ LZM	LYSC_HUMAN	P61626
	DEFB108B	Q8NET1				B2M CDABP0092 HDCMA22P	B2MG_HUMAN	P61769
	DEFB110	Q30KQ9				TGFB2	TGFB2_HUMAN	P61812
	DEFB113	Q30KQ7				NPC2 HE1	NPC2_HUMAN	P61916
	DEFB114	Q30KQ6				LCN6 LCN5 UNQ643/PRO1273	LCN6_HUMAN	P62502
	DEFB115	Q30KQ5				PPIA CYPA	PPIA_HUMAN	P62937
	DEFB116	Q30KQ4				YBX1 NSEP1 YB1	YBOX1_HUMAN	P67809
	DEFB118	Q96PH6				CXADR CAR	CXAR_HUMAN	P78310
	DEFB119	Q8N690				GPC5	GPC5_HUMAN	P78333
	DEFB121	Q5J5C9				OLR1 CLEC8A LOX1	OLR1_HUMAN	P78380
	DEFB123	Q8N688				CX3CL1 FKN NTT SCYD1 A-152E5.2	X3CL1_HUMAN	P78423
	DEFB124	Q8NES8				RELN	RELN_HUMAN	P78509
	DEFB125	Q8N687				CCL20 LARC MIP3A SCYA20	CCL20_HUMAN	P78556
	DEFB126	Q9BYW3				CCL8 MCP2 SCYA10 SCYA8	CCL8_HUMAN	P80075
	DEFB127	Q9H1M4				CCL7 MCP3 SCYA6 SCYA7	CCL7_HUMAN	P80098
	DEFB128	Q7Z7B8				GPLD1 PIGPLD1	PHLD_HUMAN	P80108
	DEFB129	Q9H1M3				CXCL6 GCP2 SCYB6	CXCL6_HUMAN	P80162
	DEFB130	P0DP74				LCN2 HNL NGAL	NGAL_HUMAN	P80188
	DEFB131	P59861				NUCB2 NEFA	NUCB2_HUMAN	P80303
	DEFB132	Q7Z7B7				S100A12	S10AC_HUMAN	P80511
	DEFB133	Q30KQ1				HAMP HEPC LEAP1 UNQ487/PRO1003	HEPC_HUMAN	P81172
	DEFB134	Q4QY38				PRLH PRH	PRRP_HUMAN	P81277
	DEFB135	Q30KP9				DEFB103A BD3 DEFB103 DEFB3; DEFB103B	D103A_HUMAN	P81534
	DEFB136	Q30KP8				DCD AIDD DSEP	DCD_HUMAN	P81605
	DEFB4A	O15263				CRB1	CRUM1_HUMAN	P82279
	DFNA5	O60443				ADAMTSL3 KIAA1233	ATL3_HUMAN	P82987
	DHH	O43323				HTRA4	HTRA4_HUMAN	P83105
	DHRS7	Q9Y394				HTRA3 PRSP	HTRA3_HUMAN	P83110
	DHRS7C	A6NNS2				QRFP	OX26_HUMAN	P83859
	DHRS9	Q9BPW9				MUC5AC MUC5	MUC5A_HUMAN	P98088
	DHRSX	Q8N5I4				FBLN2	FBLN2_HUMAN	P98095
	DHX29	Q7Z478				HSPG2	PGBM_HUMAN	P98160
	DHX30	Q7L2E3				FAM3A 2-19 2.19	FAM3A_HUMAN	P98173
	DHX8	Q14562				NDP EVR2	NDP_HUMAN	Q00604
	DIO2	Q92813				SORD	DHSO_HUMAN	Q00796
	DIXDC1	Q155Q3				PSG9 PSG11	PSG9_HUMAN	Q00887
	DKK1	O94907				PSG4 CGM4 PSG9	PSG4_HUMAN	Q00888
	DKK2	Q9UBU2				PSG6 CGM3 PSG10 PSG12 PSGGB	PSG6_HUMAN	Q00889
	DKK3	Q9UBP4				IL9R	IL9R_HUMAN	Q01113
	DKK4	Q9UBT3				DEFA5 DEF5	DEF5_HUMAN	Q01523
	DKKL1	Q9UK85				DEFA6 DEF6	DEF6_HUMAN	Q01524
	DLG4	P78352				COL4A3	CO4A3_HUMAN	Q01955
	DLK1	P80370				PLGLB1 PLGL PRGB; PLGLB2 PLGP1	PLGB_HUMAN	Q02325
	DLL1	O00548				SEMG2	SEMG2_HUMAN	Q02383
	DLL3	Q9NYJ7				COL7A1	CO7A1_HUMAN	Q02388
	DMBT1	Q9UGM3				MUC3A MUC3	MUC3A_HUMAN	Q02505
	DMKN	Q6E0U4				OC90 PLA2L	OC90_HUMAN	Q02509
	DMP1	Q13316				GUCA2A GUCA2	GUC2A_HUMAN	Q02747
	DMRTA2	Q96SC8				TEK TIE2 VMCM VMCM1	TIE2_HUMAN	Q02763
	DNAH14	Q0VDD8				MUC2 SMUC	MUC2_HUMAN	Q02817
	DNAJB11	Q9UBS4				CFHR3 CFHL3 FHR3	FHR3_HUMAN	Q02985
	DNAJB9	Q9UBS3				TGFBR3	TGBR3_HUMAN	Q03167
	DNAJC3	Q13217				TFF2 SML1	TFF2_HUMAN	Q03403
	DNASE1	P24855				PLAUR MO3 UPAR	UPAR_HUMAN	Q03405
	DNASE1L1	P49184				CFHR1 CFHL CFHL1 CFHL1P CFHR1P FHR1 HFL1 HFL2	FHR1_HUMAN	Q03591
	DNASE1L2	Q92874				COL10A1	COAA1_HUMAN	Q03692
	DNASE1L3	Q13609				PRB3	PRB3_HUMAN	Q04118
	DNASE2	O00115				HGFAC	HGFA_HUMAN	Q04756
	DNASE2B	Q8WZ79				CD164	MUC24_HUMAN	Q04900
	DPEP1	P16444				CLC LGALS10 LGALS10A	LEG10_HUMAN	Q05315
	DPEP2	Q9H4A9				COL14A1 UND	COEA1_HUMAN	Q05707
	DPEP3	Q9H4B8				ITIH3	ITIH3_HUMAN	Q06033
	DPF3	Q92784				REG3A HIP PAP PAP1	REG3A_HUMAN	Q06141
	DPP7	Q9UHL4				FMOD FM SLRR2E	FMOD_HUMAN	Q06828
	DPT	Q07507				C1QBP GC1QBP HABP1 SF2P32	C1QBP_HUMAN	Q07021
	DRAXIN	Q8NBI3				COL16A1 FP1572	COGA1_HUMAN	Q07092
	DSE	Q9UL01				CXCL9 CMK MIG SCYB9	CXCL9_HUMAN	Q07325
	DSG2	Q14126				DPT	DERM_HUMAN	Q07507
	DSPP	Q9NZW4				BSPH1	BSPH1_HUMAN	Q075Z2
	DUOX1	Q9NRD9				TFF3 ITF TFI	TFF3_HUMAN	Q07654
	DYNLT3	P51808				SCN1B	SCN1B_HUMAN	Q07699
	E2F5	Q15329				LGALS3BP M2BP	LG3BP_HUMAN	Q08380
	EBAG9	O00559				LOXL1 LOXL	LOXL1_HUMAN	Q08397
	EBI3	Q14213				MFGE8	MFGM_HUMAN	Q08431
	ECHDC1	Q9NTX5				SPOCK1 SPOCK TIC1 TICN1	TICN1_HUMAN	Q08629
	ECM1	Q16610				SPAG11B EP2 HE2	SG11B_HUMAN	Q08648
	ECM2	O94769				FGL1 HFREP1	FGL1_HUMAN	Q08830
	ECSIT	Q9BQ95				C17orf67	CQ067_HUMAN	Q0P5P2
	EDDM3A	Q14507				ABHD18 C4orf29	ABD18_HUMAN	Q0P651
	EDDM3B	P56851				GALNT2	GALT2_HUMAN	Q10471
	EDEM2	Q9BV94				GALNT1	GALT1_HUMAN	Q10472
	EDEM3	Q9BZQ6				ST3GAL1 SIAT4 SIAT4A	SIA4A_HUMAN	Q11201
	EDIL3	O43854				ST3GAL3 SIAT6	SIAT6_HUMAN	Q11203
	EDN1	P05305				ST3GAL4 CGS23 NANTA3 SIAT4C STZ	SIA4C_HUMAN	Q11206
	EDN2	P20800				HYAL1 LUCA1	HYAL1_HUMAN	Q12794
	EDN3	P14138				EFEMP1 FBLN3 FBNL	FBLN3_HUMAN	Q12805
	EDNRB	P24530				FSTL1 FRP	FSTL1_HUMAN	Q12841
	EFEMP1	Q12805				CNTN1	CNTN1_HUMAN	Q12860
	EFEMP2	O95967				AIMP1 EMAP2 SCYE1	AIMP1_HUMAN	Q12904
	EFNA1	P20827				IL24 MDA7 ST16	IL24_HUMAN	Q13007
	EFNA2	O43921				PLA2R1 CLEC13C	PLA2R_HUMAN	Q13018
	EFNA4	P52798				PSG7	PSG7_HUMAN	Q13046
	EGFL6	Q8IUX8				BAGE BAGE1	BAGE1_HUMAN	Q13072
	EGFL7	Q9UHF1				PLA2G7 PAFAH	PAFA_HUMAN	Q13093
	EGFL8	Q99944				SPP2 SPP24	SPP24_HUMAN	Q13103
	EGFLAM	Q63HQ2				PRDX4	PRDX4_HUMAN	Q13162
	EGFR	P00533				MMRN1 ECM EMILIN4 GPIA* MMRN	MMRN1_HUMAN	Q13201
	EHBP1	Q8NDI1				SEMA3B SEMA5 SEMAA	SEM3B_HUMAN	Q13214
	EHF	Q9NZC4				PAPPA	PAPP1_HUMAN	Q13219
	EHMT1	Q9H9B1				CHIT1	CHIT1_HUMAN	Q13231
	EHMT2	Q96KQ7				NOG	NOGG_HUMAN	Q13253
	EIF2AK1	Q9BQI3				IL15RA	I15RA_HUMAN	Q13261
	ELANE	P08246				SEMA3F	SEM3F_HUMAN	Q13275
	ELN	P15502				DMP1	DMP1_HUMAN	Q13316
	ELP2	Q6IA86				MFAP5 MAGP2	MFAP5_HUMAN	Q13361
	ELSPBP1	Q96BH3				BTN1A1 BTN	BT1A1_HUMAN	Q13410
	EMC1	Q8N766				MSLN MPF	MSLN_HUMAN	Q13421
	EMC10	Q5UCC4				ADAM9 KIAA0021 MCMP MDC9 MLTNG	ADAM9_HUMAN	Q13443
	EMC9	Q9Y3B6				PNOC OFQ	PNOC_HUMAN	Q13519
	EMCN	Q9ULC0				ALCAM MEMD	CD166_HUMAN	Q13740
	EMID1	Q96A84				LAMB3 LAMNB1	LAMB3_HUMAN	Q13751
	EMILIN1	Q9Y6C2				LAMC2 LAMB2T LAMNB2	LAMC2_HUMAN	Q13753
	EMILIN2	Q9BXX0				APOF	APOF_HUMAN	Q13790
	EMILIN3	Q9NT22				ENPP2 ATX PDNP2	ENPP2_HUMAN	Q13822
	ENAM	Q9NRM1				COL4A6	CO4A6_HUMAN	Q14031
	ENDOG	Q14249				COL9A3	CO9A3_HUMAN	Q14050
	ENDOU	P21128				COL9A2	CO9A2_HUMAN	Q14055
	ENHO	Q6UWT2				NID2	NID2_HUMAN	Q14112
	ENO4	A6NNW6				LRP8 APOER2	LRP8_HUMAN	Q14114
	ENPP6	Q6UWR7				IL18 IGIF IL1F4	IL18_HUMAN	Q14116
	ENPP7	Q6UWV6				EBI3 IL27B	IL27B_HUMAN	Q14213
	ENTPD5	O75356				FGL2	FGL2_HUMAN	Q14314
	ENTPD8	Q5MY95				GAS6 AXLLG	GAS6_HUMAN	Q14393
	EOGT	Q5NDL2				CSHL1 CSHP1 CSL	CSHL_HUMAN	Q14406
	EPCAM	P16422				EDDM3A FAM12A HE3A	EP3A_HUMAN	Q14507
	EPDR1	Q9UM22				WFDC2 HE4 WAP5	WFDC2_HUMAN	Q14508
	EPGN	Q6UW88				FGFBP1 FGFBP HBP17	FGFP1_HUMAN	Q14512
	EPHA10	Q5JZY3				SPARCL1	SPRL1_HUMAN	Q14515
	EPHA3	P29320				HABP2 HGFAL PHBP	HABP2_HUMAN	Q14520
	EPHA4	P54764				SEMA3A SEMAD	SEM3A_HUMAN	Q14563
	EPHA7	Q15375				ITIH4 IHRP ITIHL1 PK120 PRO1851	ITIH4_HUMAN	Q14624
	EPHA8	P29322				INSL4	INSL4_HUMAN	Q14641
	EPHB2	P29323				KIAA0100 BCOX1	K0100_HUMAN	Q14667
	EPHB4	P54760				LTBP1	LTBP1_HUMAN	Q14766
	EPHX3	Q9H6B9				LTBP2 C14orf141 LTBP3	LTBP2_HUMAN	Q14767
	EPO	P01588				ICAM4 LW	ICAM4_HUMAN	Q14773
	EPPIN	O95925				COL19A1	COJA1_HUMAN	Q14993
	EPS15	P42566				CLCA4 CaCC2 UNQ562/PRO1124	CLCA4_HUMAN	Q14CN2
	EPS8L1	Q8TE68				POSTN OSF2	POSTN_HUMAN	Q15063
	EPX	P11678				AGER RAGE	RAGE_HUMAN	Q15109
	EPYC	Q99645				PCOLCE PCPE1	PCOC1_HUMAN	Q15113
	EQTN	Q9NQ60				PON3	PON3_HUMAN	Q15166
	ERAP1	Q9NZ08				PLGLA PLGLA1 PLGP2 PRGA	PLGA_HUMAN	Q15195
	ERAP2	Q6P179				PDGFRL PRLTS	PGFRL_HUMAN	Q15198
	ERBB3	P21860				NECTIN1 HVEC PRR1 PVRL1	NECT1_HUMAN	Q15223
	ERFE	Q4G0M1				PSG5	PSG5_HUMAN	Q15238
	ERLEC1	Q96DZ1				ANGPT1 KIAA0003	ANGP1_HUMAN	Q15389
	ERLIN1	O75477				FCN2 FCNL	FCN2_HUMAN	Q15485
	ERLIN2	O94905				CDSN	CDSN_HUMAN	Q15517
	ERN1	O75460				TGFBI BIGH3	BGH3_HUMAN	Q15582
	ERN2	Q76MJ5				TPSAB1 TPS1 TPS2 TPSB1	TRYB1_HUMAN	Q15661
	ERO1A	Q96HE7				KISS1 PP5098	KISS1_HUMAN	Q15726
	ERO1B	Q86YB8				CHI3L2	CH3L2_HUMAN	Q15782
	ERP27	Q96DN0				CST6	CYTM_HUMAN	Q15828
	ERP29	P30040				CLUL1	CLUL1_HUMAN	Q15846
	ERP44	Q9BS26				ADIPOQ ACDC ACRP30 APM1 GBP28	ADIPO_HUMAN	Q15848
	ERV3-1	Q14264				ENOX2 COVA1	ENOX2_HUMAN	Q16206
	ESM1	Q9NQ30				IGFBP7 MAC25 PSF	IBP7_HUMAN	Q16270
	ESRP1	Q6NXG1				LAMA4	LAMA4_HUMAN	Q16363
	EXOG	Q9Y2C4				PRR4 LPRP PROL4	PROL4_HUMAN	Q16378
	EXTL1	Q92935				IL17A CTLA8 IL17	IL17_HUMAN	Q16552
	EXTL2	Q9UBQ6				PSG3	PSG3_HUMAN	Q16557
	F10	P00742				CARTPT CART	CART_HUMAN	Q16568
	F11	P03951				LPAL2 APOARGC	LPAL2_HUMAN	Q16609
	F12	P00748				ECM1	ECM1_HUMAN	Q16610
	F13B	P05160				CTF1	CTF1_HUMAN	Q16619
	F2	P00734				STX1A STX1	STX1A_HUMAN	Q16623
	F2R	P25116				CCL14 NCC2 SCYA14	CCL14_HUMAN	Q16627
	F2RL3	Q96RI0				PRSS8	PRSS8_HUMAN	Q16651
	F5	P12259				GUCA2B	GUC2B_HUMAN	Q16661
	F7	P08709				CCL15 MIP5 NCC3 SCYA15	CCL15_HUMAN	Q16663
	F8	P00451				MIA	MIA_HUMAN	Q16674
	F9	P00740				QPCT	QPCT_HUMAN	Q16769
	FABP6	P51161				LAMA3 LAMNA	LAMA3_HUMAN	Q16787
	FAM107B	Q9H098				MEP1B	MEP1B_HUMAN	Q16820
	FAM131A	Q6UXB0				ST3GAL2 SIAT4B	SIA4B_HUMAN	Q16842
	FAM171A1	Q5VUB5				IMPG1 IPM150 SPACR	IMPG1_HUMAN	Q17R60
	FAM171B	Q6P995				ODAPH C4orf26	ODAPH_HUMAN	Q17RF5
	FAM172A	Q8WUF8				PNLIPRP3	LIPR3_HUMAN	Q17RR3
	FAM177A1	Q8N128				COL24A1	COOA1_HUMAN	Q17RW2
	FAM180A	Q6UWF9				LY6K CO16	LY6K_HUMAN	Q17RY6
	FAM189A1	O60320				MSMP PSMP	MSMP_HUMAN	Q1L6U9
	FAM198A	Q9UFP1				SPINK13 HBVDNAPTP1 SPINK5L3	ISK13_HUMAN	Q1W4C9
	FAM19A1	Q7Z5A9				IZUMO4 C19orf36 UNQ831/PRO1758	IZUM4_HUMAN	Q1ZYL8
	FAM19A2	Q8N3H0				HLA-C HLAC	1C16_HUMAN	Q29960
	FAM19A3	Q7Z5A8				RSPO4 C20orf182	RSPO4_HUMAN	Q2I0M5
	FAM19A4	Q96LR4				PRSS53	PRS53_HUMAN	Q2L4Q9
	FAM19A5	Q7Z5A7				C5orf64	CE064_HUMAN	Q2M2E5
	FAM20A	Q96MK3				RSPO1	RSPO1_HUMAN	Q2MKA7
	FAM20C	Q8IXL6				TCTN1 TECT1 UNQ9369/PRO34160	TECT1_HUMAN	Q2MV58
	FAM26D	Q5JW98				VWC2 UNQ739/PRO1434	VWC2_HUMAN	Q2TAL6
	FAM46B	Q96A09				MST1L D1F15S1A MST1P9 MSTP9	MST1L_HUMAN	Q2TV78
	FAM57A	Q8TBR7				COL28A1 COL28	COSA1_HUMAN	Q2UY09
	FAM78A	Q5JUQ0				CR1L	CR1L_HUMAN	Q2VPA4
	FAM96A	Q9H5X1				CEACAM16 CEAL2	CEA16_HUMAN	Q2WEN9
	FAM9B	Q8IZU0				DEFB136	DB136_HUMAN	Q30KP8
	FAP	Q12884				DEFB135	DB135_HUMAN	Q30KP9
	FAS	P25445				DEFB133	DB133_HUMAN	Q30KQ1
	FAT1	Q14517				DEFB130B	D130B_HUMAN	P0DP73
	FBLN1	P23142				DEFB130A DEFB130 DEFB30	D130A_HUMAN	P0DP74
	FBLN2	P98095				DEFB116 DEFB16	DB116_HUMAN	Q30KQ4
	FBLN5	Q9UBX5				DEFB115 DEFB15	DB115_HUMAN	Q30KQ5
	FBLN7	Q53RD9				DEFB114 DEFB14	DB114_HUMAN	Q30KQ6
	FBN1	P35555				DEFB113 DEFB13	DB113_HUMAN	Q30KQ7
	FBN2	P35556				DEFB112 DEFB12	DB112_HUMAN	Q30KQ8
	FBN3	Q75N90				DEFB110 DEFB10 DEFB11 DEFB111	DB110_HUMAN	Q30KQ9
	FBXW7	Q969H0				DEFB109B DEFB109P1B	DB109_HUMAN	Q30KR1
	FCAR	P24071				P3H1 GROS1 LEPRE1 PSEC0109	P3H1_HUMAN	Q32P28
	FCGBP	Q9Y6R7				GFOD2 UNQ9430/PRO34691	GFOD2_HUMAN	Q3B7J2
	FCGR1B	Q92637				OTOGL C12orf64	OTOGL_HUMAN	Q3ZCN5
	FCGR3A	P08637				MMEL1 MELL1 MMEL2 NEP2	MMEL1_HUMAN	Q495T6
	FCGRT	P55899				CDNF ARMETL1	CDNF_HUMAN	Q49AH0
	FCMR	O60667				SCGB2B2 SCGB4A2 SCGBL	SC2B2_HUMAN	Q4G0G5
	FCN1	O00602				ERFE C1QTNF15 CTRP15 FAM132B	ERFE_HUMAN	Q4G0M1
	FCN2	Q15485				SVEP1 C9orf13 CCP22 SELOB	SVEP1_HUMAN	Q4LDE5
	FCN3	O75636				DEFB134	DB134_HUMAN	Q4QY38
	FCRL1	Q96LA6				WNT10B WNT12	WN10B_HUMAN	O00744
	FCRL3	Q96P31				TMEM155	TM155_HUMAN	Q4W5P6
	FCRL5	Q96RD9				FNDC1 FNDC2 KIAA1866 MEL4B3	FNDC1_HUMAN	Q4ZHG4
	FCRLA	Q7L513				PLA1A NMD PSPLA1	PLA1A_HUMAN	Q53H76
	FCRLB	Q6BAA4				FBLN7 TM14	FBLN7_HUMAN	Q53RD9
	FDCSP	Q8NFU4				BOLA3	BOLA3_HUMAN	Q53S33
	FETUB	Q9UGM5				C4orf48 Chr4_55	CD048_HUMAN	Q5BLP8
	FGA	P02671				SPINK9 LEKTI2	ISK9_HUMAN	Q5DT21
	FGB	P02675				ARSJ UNQ372/PRO708	ARSJ_HUMAN	Q5FYB0
	FGF10	O15520				ARSI	ARSI_HUMAN	Q5FYB1
	FGF17	O60258				RNASE13	RNS13_HUMAN	Q5GAN3
	FGF18	O76093				RNASE12	RNS12_HUMAN	Q5GAN4
	FGF19	O95750				RNASE10	RNS10_HUMAN	Q5GAN6
	FGF21	Q9NSA1				VWA2 AMACO	VWA2_HUMAN	Q5GFL6
	FGF22	Q9HCT0				NMS	NMS_HUMAN	Q5H8A3
	FGF23	Q9GZV9				FREM1 C9orf143 C9orf145 C9orf154	FREM1_HUMAN	Q5H8C1
	FGF3	P11487				CRB2	CRUM2_HUMAN	Q5IJ48
	FGF4	P08620				DEFB121 DEFB21	DB121_HUMAN	Q5J5C9
	FGF5	P12034				PYY3	PYY3_HUMAN	Q5JQD4
	FGF7	P21781				NHLRC3	NHLC3_HUMAN	Q5JS37
	FGF8	P55075				PLAC9	PLAC9_HUMAN	Q5JTB6
	FGFBP1	Q14512				TOR2A TORP1 UNQ6408/PRO21181	TOR2A_HUMAN	Q5JU69
	FGFBP2	Q9BYJ0				METTL24 C6orf186	MET24_HUMAN	Q5JXM2
	FGFBP3	Q8TAT2				EPHA10	EPHAA_HUMAN	Q5JZY3
	FGFR1	P11362				PRSS36	POLS2_HUMAN	Q5K4E3
	FGFR2	P21802				PLA2G2C	PA2GC_HUMAN	Q5R387
	FGFR3	P22607				LY6G5C C6orf20 G5C NG33	LY65C_HUMAN	Q5SRR4
	FGFR4	P22455				MUC21 C6orf205 UNQ697/PRO1342	MUC21_HUMAN	Q5SSG8
	FGFRL1	Q8N441				FREM2	FREM2_HUMAN	Q5SZK8
	FGG	P02679				EYS C6orf178 C6orf179 C6orf180 EGFL10 EGFL11 SPAM UNQ9424/PRO34591	EYS_HUMAN	Q5T1H1
	FGL1	Q08830				SFRP5 FRP1B SARP3	SFRP5_HUMAN	Q5T4F7
	FGL2	Q14314				ARTN EVN	ARTN_HUMAN	Q5T4W7
	FHL1	Q13642				C10orf25	CJ025_HUMAN	Q5T742
	FHOD3	Q2V2M9				C1QTNF12 C1QDC2 CTRP12 FAM132A	ADIPL_HUMAN	Q5T7M4
	FIBIN	Q8TAL6				C1orf134	CA134_HUMAN	Q5TEV5
	FICD	Q9BVA6				VWA5B1	VW5B1_HUMAN	Q5TIE3
	FJX1	Q86VR8				EMC10 C19orf63 HSM1 INM02 UNQ764/PRO1556	EMC10_HUMAN	Q5UCC4
	FKBP10	Q96AY3				LCN1P1 LCN1L1	LC1L1_HUMAN	Q5VSP4
	FKBP11	Q9NYL4				ABHD17B C9orf77 FAM108B1 CGI-67	AB17B_HUMAN	Q5VST6
	FKBP14	Q9NWM8				FNDC7	FNDC7_HUMAN	Q5VTL7
	FKBP2	P26885				SDHAF4 C6orf57	SDHF4_HUMAN	Q5VUM1
	FKBP7	Q9Y680				KIAA0319	K0319_HUMAN	Q5VV43
	FKBP9	O95302				IFNB1 IFB IFNB	IFNB_HUMAN	P01574
	FLT1	P17948				C1QL3 CTRP13	C1QL3_HUMAN	Q5VWW1
	FLT4	P35916				LIPN LIPL4	LIPN_HUMAN	Q5VXI9
	FMO2	Q99518				LIPK LIPL2	LIPK_HUMAN	Q5VXJ0
	FMO3	P31513				CDCP2	CDCP2_HUMAN	Q5VXM1
	FMO5	P49326				RNLS C10orf59	RNLS_HUMAN	Q5VYX0
	FMOD	Q06828				LIPM LIPL3	LIPM_HUMAN	Q5VYY2
	FN1	P02751				CST9 CLM CTES7A	CST9_HUMAN	Q5W186
	FNDC1	Q4ZHG4				CST9LP1	CST9P_HUMAN	Q5W188
	FNDC7	Q5VTL7				RESP18	RES18_HUMAN	Q5W5W9
	FOCAD	Q5VW36				CES4A CES8 UNQ440/PRO873	EST4A_HUMAN	Q5XG92
	FOLR2	P14207				EGFLAM AGRINL AGRNL PIKA	EGFLA_HUMAN	Q63HQ2
	FOLR3	P41439				METRNL	METRL_HUMAN	Q641Q3
	FOXRED2	Q8IWF2				CPZ	CBPZ_HUMAN	Q66K79
	FPGS	Q05932				MUC17 MUC3	MUC17_HUMAN	Q685J3
	FRAS1	Q86XX4				OLFML2A UNQ9394/PRO34319	OLM2A_HUMAN	Q68BL7
	FREM1	Q5H8C1				OLFML2B	OLM2B_HUMAN	Q68BL8
	FREM3	P0C091				RNF43	RNF43_HUMAN	Q68DV7
	FRMPD2	Q68DX3				C12orf73	CL073_HUMAN	Q69YU5
	FRZB	Q92765				IGFL4	IGFL4_HUMAN	Q6B9Z1
	FSHB	P01225				FCRLB FCRL2 FCRLM2 FCRY FREB2	FCRLB_HUMAN	Q6BAA4
	FSHR	P23945				IFNA2 IFNA2A IFNA2B IFNA2C	IFNA2_HUMAN	P01563
	FST	P19883				DMKN UNQ729/PRO1411	DMKN_HUMAN	Q6E0U4
	FSTL1	Q12841				IL31	IL31_HUMAN	Q6EBC2
	FSTL3	O95633				VASN SLITL2 UNQ314/PRO357/PRO1282	VASN_HUMAN	Q6EMK4
	FSTL4	Q6MZW2				SFRP4 FRPHE	SFRP4_HUMAN	Q6FHJ7
	FSTL5	Q8N475				CTRB2	CTRB2_HUMAN	Q6GPI1
	FTCDNL1	E5RQL4				PM20D1	P20D1_HUMAN	Q6GTS8
	FUCA1	P04066				ISM2 TAIL1 THSD3 PSEC0137	ISM2_HUMAN	Q6H9L7
	FUCA2	Q9BTY2				OVOS2	OVOS2_HUMAN	Q6IE36
	FURIN	P09958				OVOS1	OVOS1_HUMAN	Q6IE37
	FUT10	Q6P4F1				SPINK14 SPINK5L2	ISK14_HUMAN	Q6IE38
	FUT11	Q495W5				LAIR2 CD306	LAIR2_HUMAN	Q6ISS4
	FXN	Q16595				LCN12	LCN12_HUMAN	Q6JVE5
	FXR1	P51114				LCN10	LCN10_HUMAN	Q6JVE6
	FXYD1	O00168				LCN8 LCN5	LCN8_HUMAN	Q6JVE9
	FXYD3	Q14802				GDF6 BMP13 GDF16	GDF6_HUMAN	Q6KF10
	GABBR1	Q9UBS5				PRR27 C4orf40	PRR27_HUMAN	Q6MZM9
	GABRA1	P14867				FSTL4 KIAA1061	FSTL4_HUMAN	Q6MZW2
	GABRA2	P47869				CCDC70	CCD70_HUMAN	Q6NSX1
	GABRA5	P31644				CES5A CES7	EST5A_HUMAN	Q6NT32
	GABRD	O14764				CGB2	CGB2_HUMAN	Q6NT52
	GABRG3	Q99928				CHADL SLRR4B	CHADL_HUMAN	Q6NUI6
	GABRP	O00591				PSAPL1	SAPL1_HUMAN	Q6NUJ1
	GAL	P22466				AADACL2	ADCL2_HUMAN	Q6P093
	GAL3ST1	Q99999				PLBD1	PLBL1_HUMAN	Q6P4A8
	GAL3ST2	Q9H3Q3				LEG1 C6orf58	LEG1H_HUMAN	Q6P5S2
	GAL3ST3	Q96A11				NOTUM OK/SW-CL.30	NOTUM_HUMAN	Q6P988
	GALC	P54803				VWA1	VWA1_HUMAN	Q6PCB0
	GALNS	P34059				SPAG11A EP2 HE2	SG11A_HUMAN	Q6PDA7
	GALNT10	Q86SR1				PRSS54 KLKBL4	PRS54_HUMAN	Q6PEW0
	GALNT12	Q8IXK2				PODNL1 SLRR5B	PONL1_HUMAN	Q6PEZ8
	GALNT15	Q8N3T1				DHRS4L2 SDR25C3	DR4L2_HUMAN	Q6PKH6
	GALNT2	Q10471				APOA5 RAP3 UNQ411/PRO773	APOA5_HUMAN	Q6Q788
	GALNT6	Q8NCL4				SAMD1	SAMD1_HUMAN	Q6SPF0
	GALNT8	Q9NY28				SPINT4 C20orf137	SPIT4_HUMAN	Q6UDR6
	GALNTL6	Q49A17				TEPP	TEPP_HUMAN	Q6URK8
	GALP	Q9UBC7				CSPG4 MCSP	CSPG4_HUMAN	Q6UVK1
	GANAB	Q14697				CBLN3 UNQ755/PRO1486	CBLN3_HUMAN	Q6UW01
	GARS	P41250				SFTA2 SFTPG UNQ541/PRO1098	SFTA2_HUMAN	Q6UW10
	GAS1	P54826				REG3G PAP1B UNQ429/PRO162	REG3G_HUMAN	Q6UW15
	GAS6	Q14393				IGFL1 UNQ644/PRO1274	IGFL1_HUMAN	Q6UW32
	GAST	P01350				UQCC3 C11orf83 UNQ655/PRO1286	UQCC3_HUMAN	Q6UW78
	GBGT1	Q8N5D6				EPGN UNQ3072/PRO9904	EPGN_HUMAN	Q6UW88
	GC	P02774				CLPSL2 C6orf126 UNQ3045/PRO9861	COLL2_HUMAN	Q6UWE3
	GCG	P04062				NXPE4 C11orf33 FAM55D UNQ3018/PRO9799	NXPE4_HUMAN	Q6UWF7
	GCGR	P38435				FAM180A UNQ1940/PRO4423	F180A_HUMAN	Q6UWF9
	GCNT7	P01275				GPR15L C10orf99 UNQ1833/PRO3446	GP15L_HUMAN	Q6UWK7
	GCSH	P47871				GLIPR1L1 UNQ2972/PRO7434	GPRL1_HUMAN	Q6UWM5
	GDF1	P27539				SPINK6 UNQ844/PRO1782	ISK6_HUMAN	Q6UWN8
	GDF10	P55107				DHRS11 SDR24C1 UNQ836/PRO1774	DHR11_HUMAN	Q6UWP2
	GDF11	O95390				SBSN UNQ698/PRO1343	SBSN_HUMAN	Q6UWP8
	GDF15	Q99988				LYZL1 LYC2 UNQ648/PRO1278	LYZL1_HUMAN	Q6UWQ5
	GDF2	Q9UK05				IGFL2 UNQ645/PRO1275	IGFL2_HUMAN	Q6UWQ7
	GDF3	Q9NR23				ENPP6 UNQ1889/PRO4334	ENPP6_HUMAN	Q6UWR7
	GDF5	P43026				ENHO C9orf165 UNQ470/PRO830	ENHO_HUMAN	Q6UWT2
	GDF6	Q6KF10				C5orf46 UNQ472/PRO839	CE046_HUMAN	Q6UWT4
	GDF7	Q7Z4P5				GLB1L UNQ229/PRO262	GLB1L_HUMAN	Q6UWU2
	GDF9	O60383				LCN15 UNQ2541/PRO6093	LCN15_HUMAN	Q6UWW0
	GDNF	P39905				HHIPL2 HHIP3 KIAA1822L UNQ841/PRO1779	HIPL2_HUMAN	Q6UWX4
	GFOD2	Q3B7J2				ARSK TSULF UNQ630/PRO1246	ARSK_HUMAN	Q6UWY0
	GFPT2	O94808				PRSS57 PRSSL1 UNQ782/PRO1599	PRS57_HUMAN	Q6UWY2
	GFRA2	O00451				OLFML1 UNQ564/PRO1126	OLFL1_HUMAN	Q6UWY5
	GFRA4	Q9GZZ7				OLFM4 GW112 UNQ362/PRO698	OLFM4_HUMAN	Q6UX06
	GGA2	Q9UJY4				DHRS13 SDR7C5 UNQ419/PRO853	DHR13_HUMAN	Q6UX07
	GGH	Q92820				VSTM1 UNQ3033/PRO9835	VSTM1_HUMAN	Q6UX27
	GGT1	P19440				AMTN UNQ689/PRO1329	AMTN_HUMAN	Q6UX39
	GGT5	P36269				ALKAL2 FAM150B UNQ542/PRO1097	ALKL2_HUMAN	Q6UX46
	GH1	P01241				C17orf99 IL40 UNQ464/PRO809	IL40_HUMAN	Q6UX52
	GH2	P01242				C16orf89 UNQ904/PRO1925	CP089_HUMAN	Q6UX73
	GHDC	Q8N2G8				C6orf15 STG UNQ1840/PRO3566	CF015_HUMAN	Q6UXA7
	GHRH	P01286				FAM131A C3orf40 UNQ715/PRO1378	F131A_HUMAN	Q6UXB0
	GHRHR	Q02643				IGFL3 UNQ483/PRO982	IGFL3_HUMAN	Q6UXB1
	GHRL	Q9UBU3				CXCL17 VCC1 UNQ473/PRO842	CXL17_HUMAN	Q6UXB2
	GIF	P27352				CLEC18B MRLP1 UNQ306/PRO347	CL18B_HUMAN	Q6UXF7
	GIP	P09681				ANGPTL8 C19orf80 RIFL UNQ599/PRO1185	ANGL8_HUMAN	Q6UXH0
	GKN1	Q9NS71				CRELD2 UNQ185/PRO211	CREL2_HUMAN	Q6UXH1
	GKN2	Q86XP6				CCBE1 KIAA1983 UNQ1921/PRO4395	CCBE1_HUMAN	Q6UXH8
	GLA	P06280				PAMR1 RAMP FP938 UNQ699/PRO1344	PAMR1_HUMAN	Q6UXH9
	GLB1	P16278				VIT UNQ647/PRO1277	VITRN_HUMAN	Q6UXI7
	GLB1L	Q6UWU2				NPNT EGFL6L POEM UNQ295/PRO334	NPNT_HUMAN	Q6UXI9
	GLB1L2	Q8IW92				TREML4 TLT4 UNQ9425/PRO34675	TRML4_HUMAN	Q6UXN2
	GLCE	O94923				C2orf66 UNQ6411/PRO21186	CB066_HUMAN	Q6UXQ4
	GLG1	Q92896				UNQ6190/PRO20217	YO002_HUMAN	Q6UXQ8
	GLIPR1	P48060				SERPINA13P SERPINA13 UNQ6121/PRO20043	SPA13_HUMAN	Q6UXR4
	GLIPR1L1	Q6UWM5				UNQ6494/PRO21346	YI004_HUMAN	Q6UXR6
	GLIS3	Q8NEA6				CLEC19A UNQ5810/PRO19627	CL19A_HUMAN	Q6UXS0
	GLMP	Q8WWB7				ALKAL1 FAM150A UNQ9433/PRO34745	ALKL1_HUMAN	Q6UXT8
	GLRB	P48167				ABHD15 UNQ6510/PRO21435	ABH15_HUMAN	Q6UXT9
	GLS	O94925				UNQ9165/PRO28630	YS002_HUMAN	Q6UXU0
	GLT6D1	Q7Z4J2				UNQ6126/PRO20091	YV010_HUMAN	Q6UXV3
	GLTPD2	A6NH11				APOOL CXorf33 FAM121A MIC27 UNQ8193/PRO23204	MIC27_HUMAN	Q6UXV4
	GLUD1	P00367				ITIH6 ITIH5L UNQ6369/PRO21074	ITIH6_HUMAN	Q6UXX5
	GM2A	P17900				RSPO2 UNQ9384/PRO34209	RSPO2_HUMAN	Q6UXX9
	GML	Q99445				UNQ5830/PRO19650/PRO19816	YB003_HUMAN	Q6UY13
	GNAS	O95467				ADAMTSL4 TSRC1 PP1396 UNQ2803/PRO34012	ATL4_HUMAN	Q6UY14
	GNLY	P22749				PATE2 C11orf38 UNQ3112/PRO10144	PATE2_HUMAN	Q6UY27
	GNPTG	Q9UJJ9				MUC6	MUC6_HUMAN	Q6W4X9
	GNRH1	P01148				IGSF10 CMF608	IGS10_HUMAN	Q6WRI0
	GNRH2	O43555				SOSTDC1 USAG1 CDA019	SOSD1_HUMAN	Q6X4U4
	GNS	P15586				ZPBP2 ZPBPL	ZPBP2_HUMAN	Q6X784
	GOLM1	Q8NBJ4				SCGB1D4 UNQ517/PRO812	SG1D4_HUMAN	Q6XE38
	GORAB	Q5T7V8				RPTN	RPTN_HUMAN	Q6XPR3
	GOT2	P00505				IL34 C16orf77	IL34_HUMAN	Q6ZMJ4
	GP2	P55259				ADAMTSL5 THSD6	ATL5_HUMAN	Q6ZMM2
	GP6	Q9HCN6				THSD4 UNQ9334/PRO34005	THSD4_HUMAN	Q6ZMP0
	GPC2	Q8N158				ACP7 PAPL PAPL1	ACP7_HUMAN	Q6ZNF0
	GPC5	P78333				OTOG OTGN	OTOG_HUMAN	Q6ZRI0
	GPC6	Q9Y625				QSOX2 QSCN6L1 SOXN	QSOX2_HUMAN	Q6ZRP7
	GPD2	P43304					YQ032_HUMAN	Q6ZRU5
	GPER1	Q99527				C9orf47 C9orf108	CI047_HUMAN	Q6ZRZ4
	GPHA2	Q96T91				KCP CRIM2 KCP1	KCP_HUMAN	Q6ZWJ8
	GPHB5	Q86YW7				FP248	YH006_HUMAN	Q71RG6
	GPIHBP1	Q8IV16				FBN3 KIAA1776	FBN3_HUMAN	Q75N90
	GPLD1	P80108				UTS2B URP UTS2D	UTS2B_HUMAN	Q765I0
	GPR162	Q16538				BRINP3 DBCCR1L DBCCR1L1 FAM5C	BRNP3_HUMAN	Q76B58
	GPX3	P22352				ADAMTS13 C9orf8 UNQ6102/PRO20085	ATS13_HUMAN	Q76LX8
	GPX4	P36969				CCDC80 DRO1 URB HBE245	CCD80_HUMAN	Q76M96
	GPX5	O75715				CHST9 UNQ2549/PRO6175	CHST9_HUMAN	Q7L1S5
	GPX6	P59796				FCRLA FCRL FCRL1 FCRLM1 FCRX FREB UNQ291/PRO329	FCRLA_HUMAN	Q7L513
	GPX7	Q96SL4				VASH1 KIAA1036 VASH	VASH1_HUMAN	Q7L8A9
	GREM1	O60565				OTOP1	OTOP1_HUMAN	Q7RTM1
	GREM2	Q9H772				NIPA1 SPG6	NIPA1_HUMAN	Q7RTP0
	GRHL3	Q8TE85				OTOA	OTOAN_HUMAN	Q7RTW8
	GRIA2	P42262				PRSS48 ESSPL	PRS48_HUMAN	Q7RTY5
	GRIA3	P42263				OVCH1	OVCH1_HUMAN	Q7RTY7
	GRIA4	P48058				OVCH2 OVTN	OVCH2_HUMAN	Q7RTZ1
	GRIK2	Q13002				SSBP3-AS1 C1orf191 MSTP128	SSAS1_HUMAN	Q7Z2R9
	GRIN2B	Q13224				MAMDC2	MAMC2_HUMAN	Q7Z304
	GRM2	Q14416				NOTCH2NL N2N	NT2NL_HUMAN	Q7Z3S9
	GRM3	Q14832				LINC00305 C18orf20 NCRNA00305	CR020_HUMAN	Q7Z4B0
	GRM5	P41594				ADM2 AM2	ADM2_HUMAN	Q7Z4H4
	GRN	P28799				GDF7	GDF7_HUMAN	Q7Z4P5
	GRP	P07492				C6orf120	CF120_HUMAN	Q7Z4R8
	GSG1	Q2KHT4				LYZL2	LYZL2_HUMAN	Q7Z4W2
	GSN	P06396				PRSS42 TESSP2	PRS42_HUMAN	Q7Z5A4
	GTDC1	Q4AE62				FAM19A5 TAFA5 UNQ5208/PRO34524	F19A5_HUMAN	Q7Z5A7
	GTPBP10	A4D1E9				FAM19A3 TAFA3	F19A3_HUMAN	Q7Z5A8
	GUCA2A	Q02747				FAM19A1 TAFA1	F19A1_HUMAN	Q7Z5A9
	GUCA2B	Q16661				HSD11B1L HSD3 SCDR10 SDR26C2	DHI1L_HUMAN	Q7Z5J1
	GUSB	P08236				VMO1 UNQ6350/PRO21055	VMO1_HUMAN	Q7Z5L0
	GVQW1	Q8N7I0				C1QL2 CTRP10	C1QL2_HUMAN	Q7Z5L3
	GXYLT1	Q4G148				HSD17B13 SCDR9 SDR16C3 HMFN0376 UNQ497/PRO1014	DHB13_HUMAN	Q7Z5P4
	GXYLT2	A0PJZ3				MUC19	MUC19_HUMAN	Q7Z5P9
	GYPB	P06028				BMP8A	BMP8A_HUMAN	Q7Z5Y6
	GZMA	P12544				DEFB132 DEFB32 UNQ827/PRO1754	DB132_HUMAN	Q7Z7B7
	GZMB	P10144				DEFB128 DEFB28	DB128_HUMAN	Q7Z7B8
	GZMH	P20718				ABI3BP NESHBP TARSH	TARSH_HUMAN	Q7Z7G0
	GZMK	P49863				LYG2 LYGH	LYG2_HUMAN	Q86SG7
	GZMM	P51124				PRNT	PRNT_HUMAN	Q86SH4
	H6PD	O95479				C5orf38 CEI	CEI_HUMAN	Q86SI9
	HABP2	Q14520				SMIM29 C6orf1 LBH	SIM29_HUMAN	Q86T20
	HADHB	P55084				LUZP2 UNQ2566/PRO6246	LUZP2_HUMAN	Q86TE4
	HAMP	P81172				ADAMTSL2 KIAA0605	ATL2_HUMAN	Q86TH1
	HAPLN1	P10915				ADCK1	ADCK1_HUMAN	Q86TW2
	HAPLN2	Q9GZV7				SERPINA11	SPA11_HUMAN	Q86U17
	HAPLN3	Q96S86				TAC4	TKN4_HUMAN	Q86UU9
	HAPLN4	Q86UW8				HAPLN4 BRAL2 KIAA1926	HPLN4_HUMAN	Q86UW8
	HARS2	P49590				ITIH5 KIAA1953 PP14776 UNQ311/PRO354	ITIH5_HUMAN	Q86UX2
	HAVCR1	Q96D42				FJX1	FJX1_HUMAN	Q86VR8
	HCCS	P53701				IFNE IFNE1 UNQ360/PRO655	IFNE_HUMAN	Q86WN2
	HDHD5	Q9BXW7				OOSP2 PLAC1L TMEM122	OOSP2_HUMAN	Q86WS3
	HEATR5A	Q86XA9				CHSY1 CHSY CSS1 KIAA0990 UNQ756/PRO1487	CHSS1_HUMAN	Q86X52
	HEPH	Q9BQS7				GKN2 BLOT GDDR TFIZ1 UNQ465/PRO813	GKN2_HUMAN	Q86XP6
	HEXA	P06865				ANGPTL5 UNQ5795/PRO19600	ANGL5_HUMAN	Q86XS5
	HEXB	P07686				FRAS1 KIAA1500	FRAS1_HUMAN	Q86XX4
	HFE2	Q6ZVN8				COL23A1	CONA1_HUMAN	Q86Y22
	HGF	P14210				BAGE5	BAGE5_HUMAN	Q86Y27
	HGFAC	Q04756				BAGE4 MLL3P	BAGE4_HUMAN	Q86Y28
	HHIP	Q96QV1				BAGE3	BAGE3_HUMAN	Q86Y29
	HHIPL1	Q96JK4				BAGE2	BAGE2_HUMAN	Q86Y30
	HHIPL2	Q6UWX4				XYLT1 XT1	XYLT1_HUMAN	Q86Y38
	HHLA1	C9JL84				LYPD6 UNQ3023/PRO9821	LYPD6_HUMAN	Q86Y78
	HHLA2	Q9UM44				TMEM25 UNQ2531/PRO6030	TMM25_HUMAN	Q86YD3
	HIBADH	P31937				THNSL2	THNS2_HUMAN	Q86YJ6
	HINT2	Q9BX68				BPIFA4P BASE LATH	LATH_HUMAN	Q86YQ2
	HIPK1	Q86Z02				GPHB5 GPB5 ZLUT1	GPHB5_HUMAN	Q86YW7
	HLA-A	P01891				C1QL4 CTRP11	C1QL4_HUMAN	Q86Z23
	HLA-C	P04222				IFNL1 IL29 ZCYTO21	IFNL1_HUMAN	Q8IU54
	HLA-DOA	P06340				WFDC8 C20orf170 WAP8	WFDC8_HUMAN	Q8IUA0
	HLA-DPA1	P20036				WFDC3 WAP14	WFDC3_HUMAN	Q8IUB2
	HLA-DQA1	P01909				WFDC10B WAP12	WF10B_HUMAN	Q8IUB3
	HLA-DQB1	P01920				WFDC13 C20orf138 WAP13	WFD13_HUMAN	Q8IUB5
	HLA-DQB2	P05538				CREG2	CREG2_HUMAN	Q8IUH2
	HMCN1	Q96RW7				ZDHHC13 HIP14L HIP3RP	ZDH13_HUMAN	Q8IUH4
	HMCN2	Q8NDA2				ZDHHC17 HIP14 HIP3 HYPH KIAA0946 HSPC294	ZDH17_HUMAN	Q8IUH5
	HMGCL	P35914				CBLN2 UNQ1892/PRO4338	CBLN2_HUMAN	Q8IUK8
	HMSD	A8MTL9				CILP2	CILP2_HUMAN	Q8IUL8
	HP	P00738				EGFL6 MAEG PP648 UNQ281/PRO320	EGFL6_HUMAN	Q8IUX8
	HPR	P00739				MT-RNR2 HN	HUNIN_HUMAN	Q8IVG9
	HPSE	Q9Y251				CPO	CBPO_HUMAN	Q8IVL8
	HPSE2	Q8WWQ2				SBSPON C8orf84 RPESP	SBSPO_HUMAN	Q8IVN8
	HPX	P02790				SERPINA12	SPA12_HUMAN	Q8IW75
	HRC	P23327				GLB1L2 MSTP014 UNQ210/PRO236	GLBL2_HUMAN	Q8IW92
	HRG	P04196				SFTPA2 COLEC5 PSAP SFTP1 SFTPA SFTPA2B	SFPA2_HUMAN	Q8IWL1
	HS2ST1	Q7LGA3				SFTPA1 COLEC4 PSAP SFTP1 SFTPA SFTPA1B	SFTA1_HUMAN	Q8IWL2
	HS3ST1	O14792				CNTN4	CNTN4_HUMAN	Q8IWV2
	HS6ST1	O60243				SCUBE1	SCUB1_HUMAN	Q8IWY4
	HS6ST2	Q96MM7				SCUBE3 CEGF3	SCUB3_HUMAN	Q8IX30
	HS6ST3	Q8IZP7				SPACA3 LYC3 LYZL3 SLLP1 SPRASA UNQ424/PRO862	SACA3_HUMAN	Q8IXA5
	HSD11B1L	Q7Z5J1				FAM20C DMP4	FA20C_HUMAN	Q8IXL6
	HSD17B11	Q8NBQ5				LAS2 C18orf54	LAS2_HUMAN	Q8IYD9
	HSD17B7	P56937				PRSS58 TRY1 TRYX3 UNQ2540/PRO6090	PRS58_HUMAN	Q8IYP2
	HSP90B1	P14625				COL27A1 KIAA1870	CORA1_HUMAN	Q8IZC6
	HSPA13	P48723				IFNL3 IL28B IL28C ZCYTO22	IFNL3_HUMAN	Q8IZI9
	HSPA5	P11021				IFNL2 IL28A ZCYTO20	IFNL2_HUMAN	Q8IZJ0
	HSPG2	P98160				CPAMD8 KIAA1283	CPMD8_HUMAN	Q8IZJ3
	HTATIP2	Q9BUP3				DEFB107A DEFB107 DEFB7; DEFB107B	D107A_HUMAN	Q8IZN7
	HTN1	P15515				LGI2 KIAA1916 LGIL2	LGI2_HUMAN	Q8N0V4
	HTN3	P15516				DEFB106A BD6 DEFB106 DEFB6; DEFB106B	D106A_HUMAN	Q8N104
	HTRA1	Q92743				MMP21	MMP21_HUMAN	Q8N119
	HTRA3	P83110				CNPY4 PSEC0237 UNQ1909/PRO4354	CNPY4_HUMAN	Q8N129
	HTRA4	P83105				LGI4 LGIL3 UNQ6515/PRO21485	LGI4_HUMAN	Q8N135
	HYAL1	Q12794				LGI3 LGIL4 UNQ8190/PRO23199	LGI3_HUMAN	Q8N145
	HYAL2	Q12891				GPC2	GPC2_HUMAN	Q8N158
	HYAL3	O43820				LYG1 UNQ1939/PRO4422	LYG1_HUMAN	Q8N1E2
	HYOU1	Q9Y4L1				VWDE	VWDE_HUMAN	Q8N2E2
	IAPP	P10997				TOR2A HEMBA1005096 PSEC0218	TOR2X_HUMAN	Q8N2E6
	IBSP	P21815				LTBP4	LTBP4_HUMAN	Q8N2S1
	ICAM1	P05362				EXOC3-AS1 C5orf55	EXAS1_HUMAN	Q8N2X6
	ICAM2	P13598				AGGF1 GPATC7 GPATCH7 VG5Q	AGGF1_HUMAN	Q8N302
	ICAM4	Q14773				MUC20 KIAA1359 UNQ2782/PRO7170	MUC20_HUMAN	Q8N307
	ID1	P41134				NXPE1 FAM55A	NXPE1_HUMAN	Q8N323
	IDE	P14735				MUC15 UNQ750/PRO1481	MUC15_HUMAN	Q8N387
	IDNK	Q5T6J7				PRSS35 C6orf158 UNQ522/PRO1057	PRS35_HUMAN	Q8N3Z0
	IDS	P22304				CPXM2 CPX2 UNQ676/PRO1310	CPXM2_HUMAN	Q8N436
	IDUA	P35475				SFRP1 FRP FRP1 SARP2	SFRP1_HUMAN	Q8N474
	IER3IP1	Q9Y5U9				FSTL5 KIAA1263	FSTL5_HUMAN	Q8N475
	IFI27L2	Q9H2X8				BPIFB2 BPIL1 C20orf184 LPLUNC2 UNQ2489/PRO5776	BPIB2_HUMAN	Q8N4F0
	IFI30	P13284				CPA6 CPAH	CBPA6_HUMAN	Q8N4T0
	IFNA10	P01566				FAM24B	FA24B_HUMAN	Q8N5W8
	IFNA13	P01562				DEFB125 DEFB25	DB125_HUMAN	Q8N687
	IFNA14	P01570				DEFB123 DEFB23 UNQ1963/PRO4485	DB123_HUMAN	Q8N688
	IFNA16	P05015				DEFB119 DEFB120 DEFB19 DEFB20 UNQ2449/PRO5729	DB119_HUMAN	Q8N690
	IFNA17	P01571				IGSF1 IGDC1 KIAA0364 PGSF2	IGSF1_HUMAN	Q8N6C5
	IFNA2	P01563				LILRA3 ILT6 LIR4	LIRA3_HUMAN	Q8N6C8
	IFNA21	P01568				ADAMTSL1 ADAMTSR1 C9orf94 UNQ528/PRO1071	ATL1_HUMAN	Q8N6G6
	IFNA4	P05014				LRRC17 P37NB UNQ3076/PRO9909	LRC17_HUMAN	Q8N6Y2
	IFNA5	P01569				NPW PPL8 PPNPW	NPW_HUMAN	Q8N729
	IFNA6	P05013				CELF2-AS1 C10orf31	CEAS1_HUMAN	Q8N7Q2
	IFNA7	P01567				C11orf44	CK044_HUMAN	Q8N8P7
	IFNA8	P32881				NIPA2	NIPA2_HUMAN	Q8N8Q9
	IFNAR1	P17181				C2orf69	CB069_HUMAN	Q8N8R5
	IFNB1	P01574				BMPER KIAA1965	BMPER_HUMAN	Q8N8U9
	IFNE	Q86WN2				DAND5 CER2 CKTSF1B3 GREM3 SP1	DAND5_HUMAN	Q8N907
	IFNG	P01579				FNDC5 FRCP2	FNDC5_HUMAN	Q8NAU1
	IFNGR1	P15260				GATD1 PDDC1	GALD1_HUMAN	Q8NB37
	IFNL1	Q8IU54				DRAXIN C1orf187 PSEC0258 UNQ3119/PRO10268	DRAXI_HUMAN	Q8NBI3
	IFNL2	Q8IZJ0				PCYOX1L PSEC0105	PCYXL_HUMAN	Q8NBM8
	IFNL3	Q8IZI9				PCSK9 NARC1 PSEC0052	PCSK9_HUMAN	Q8NBP7
	IFNLR1	Q8IU57				HSD17B11 DHRS8 PAN1B SDR16C2 PSEC0029 UNQ207/PRO233	DHB11_HUMAN	Q8NBQ5
	IFNW1	P05000				TP53I13 DSCP1	P5I13_HUMAN	Q8NBR0
	IGF1	P05019				PLA2G15 LYPLA3 UNQ341/PRO540	PAG15_HUMAN	Q8NCC3
	IGF2	P01344				CLEC18C MRLP3	CL18C_HUMAN	Q8NCF0
	IGFALS	P35858				NAXE AIBP APOA1BP YJEFN1	NNRE_HUMAN	Q8NCW5
	IGFBP1	P08833				HMCN2	HMCN2_HUMAN	Q8NDA2
	IGFBP2	P18065				LY6G5B C6orf19 G5B	LY65B_HUMAN	Q8NDX9
	IGFBP3	P17936				C3orf58 DIA1	DIA1_HUMAN	Q8NDZ4
	IGFBP4	P22692				ACRBP	ACRBP_HUMAN	Q8NEB7
	IGFBP5	P24593				DEFB124 DEFB24	DB124_HUMAN	Q8NES8
	IGFBP6	P24592				DEFB108B DEFB108 DEFB8	D108B_HUMAN	Q8NET1
	IGFBP7	Q16270				IL27 IL27A IL30	IL27A_HUMAN	Q8NEV9
	IGFBPL1	Q8WX77				WFDC9 WAP9	WFDC9_HUMAN	Q8NEX5
	IGFL1	Q6UW32				WFDC11 WAP11	WFD11_HUMAN	Q8NEX6
	IGFL2	Q6UWQ7				PRSS33	PRS33_HUMAN	Q8NF86
	IGFL3	Q6UXB1				BPIFB6 BPIL3	BPIB6_HUMAN	Q8NFQ5
	IGFLR1	Q9H665				BPIFC BPIL2	BPIFC_HUMAN	Q8NFQ6
	IGIP	A6NJ69				IL17RE UNQ3056/PRO9877	I17RE_HUMAN	Q8NFR9
	IGLON5	A6NGN9				FDCSP C4orf7 UNQ733/PRO1419	FDSCP_HUMAN	Q8NFU4
	IGSF1	Q8N6C5				COL22A1	COMA1_HUMAN	Q8NFW1
	IGSF10	Q6WRI0				DEFB105A BD5 DEFB105 DEFB5; DEFB105B	D105A_HUMAN	Q8NG35
	IGSF11	Q5DX21				NPB PPL7 PPNPB	NPB_HUMAN	Q8NG41
	IGSF21	Q96ID5				PRSS3P2 T6 TRY6	TRY6_HUMAN	Q8NHM4
	IGSF8	Q969P0				CCL4L1 CCL4L LAG1 SCYA4L1; CCL4L2 CCL4L SCYA4L2	CC4L_HUMAN	Q8NHW4
	IGSF9	Q9P2J2				OTOS OTOSP	OTOSP_HUMAN	Q8NHW6
	IHH	Q14623				ANGPTL6 AGF ARP5 UNQ152/PRO178	ANGL6_HUMAN	Q8NI99
	IL10	P22301				RNASE11 C14orf6 UNQ5832/PRO19669	RNS11_HUMAN	Q8TAA1
	IL11	P20809				IL17D UNQ3096/PRO21175	IL17D_HUMAN	Q8TAD2
	IL11RA	Q14626				VSTM2A VSTM2	VTM2A_HUMAN	Q8TAG5
	IL12B	P29460				FIBIN PSEC0235	FIBIN_HUMAN	Q8TAL6
	IL12RB1	P42701				FGFBP3 C10orf13 PSEC0101	FGFP3_HUMAN	Q8TAT2
	IL12RB2	Q99665				C11orf45	CK045_HUMAN	Q8TAV5
	IL13	P35225				MUC7 MG2	MUC7_HUMAN	Q8TAX7
	IL13RA1	P78552				SPATA20	SPT20_HUMAN	Q8TB22
	IL15RA	Q13261				NDNF C4orf31 UNQ2748/PRO6487	NDNF_HUMAN	Q8TB73
	IL17A	Q16552				ITFG1 LNKN-1 TIP CDA08	TIP_HUMAN	Q8TB96
	IL17B	Q9UHF5				ENOX1 PIG38	ENOX1_HUMAN	Q8TC92
	IL17C	Q9P0M4				WFDC5 PRG5 WAP1 UNQ3036/PRO9842	WFDC5_HUMAN	Q8TCV5
	IL17D	Q8TAD2				MRAP C21orf61 FALP	MRAP_HUMAN	Q8TCY5
	IL17F	Q96PD4				CD99L2 MIC2L1 UNQ1964/PRO4486	C99L2_HUMAN	Q8TCZ2
	IL17RA	Q96F46				AGR3 BCMP11 PDIA18 UNQ642/PRO1272	AGR3_HUMAN	Q8TD06
	IL17RC	Q8NAC3				RAET1E LETAL N2DL4 ULBP4 UNQ1867/PRO4303	RAE1E_HUMAN	Q8TD07
	IL17RE	Q8NFR9				SCGB1C1	SG1C1_HUMAN	Q8TD33
	IL18BP	O95998				CD200R1 CD200R CRTR2 MOX2R OX2R UNQ2522/PRO6015	MO2R1_HUMAN	Q8TD46
	IL18R1	Q13478				RNASE8	RNAS8_HUMAN	Q8TDE3
	IL18RAP	O95256				NETO1 BTCL1	NETO1_HUMAN	Q8TDF5
	IL19	Q9UHD0				BPIFB1 C20orf114 LPLUNC1 UNQ706/PRO1357	BPIB1_HUMAN	Q8TDL5
	IL1R1	P14778				ADAMTS17	ATS17_HUMAN	Q8TE56
	IL1R2	P27930				ADAMTS16 KIAA2029	ATS16_HUMAN	Q8TE57
	IL1RAP	Q9NPH3				ADAMTS15	ATS15_HUMAN	Q8TE58
	IL1RL1	Q01638				ADAMTS19	ATS19_HUMAN	Q8TE59
	IL1RL2	Q9HB29				ADAMTS18 ADAMTS21	ATS18_HUMAN	Q8TE60
	IL1RN	P18510				PXYLP1 ACPL2 HEL124 XYLP UNQ370/PRO706	PXYP1_HUMAN	Q8TE99
	IL2	P60568				SNED1	SNED1_HUMAN	Q8TER0
	IL20	Q9NYY1				WFIKKN2 GASP1 WFIKKNRP UNQ9235/PRO31996	WFKN2_HUMAN	Q8TEU8
	IL20RA	Q9UHF4				DEFB104A DEFB104 DEFB4; DEFB104B	D104A_HUMAN	Q8WTQ1
	IL21	Q9HBE4				NTN5	NET5_HUMAN	Q8WTR8
	IL22	Q9GZX6				SSC4D SRCRB4D	SRB4D_HUMAN	Q8WTU2
	IL22RA2	Q969J5				TSPEAR C21orf29	TSEAR_HUMAN	Q8WU66
	IL23A	Q9NPF7				TSKU E2IG4 LRRC54 TSK UNQ850/PRO1788	TSK_HUMAN	Q8WUA8
	IL24	Q13007				FAM172A C5orf21	F172A_HUMAN	Q8WUF8
	IL25	Q9H293				CYB5D2	NEUFC_HUMAN	Q8WUJ1
	IL26	Q9NPH9				THEM6 C8orf55 PSEC0098	THEM6_HUMAN	Q8WUY1
	IL27	Q8NEV9				UCMA C10orf49	UCMA_HUMAN	Q8WVF2
	IL2RB	P14784				SECTM1 K12	SCTM1_HUMAN	Q8WVN6
	IL3	P08700				CANT1 SHAPY	CANT1_HUMAN	Q8WVQ1
	IL31	Q6EBC2				ITLN1 INTL ITLN LFR UNQ640/PRO1270	ITLN1_HUMAN	Q8WWA0
	IL31RA	Q8NI17				C1orf54	CA054_HUMAN	Q8WWF1
	IL32	P24001				NRG4	NRG4_HUMAN	Q8WWG1
	IL34	Q6ZMJ4				HPSE2 HPA2	HPSE2_HUMAN	Q8WWQ2
	IL3RA	P26951				ITLN2 UNQ2789/PRO7179	ITLN2_HUMAN	Q8WWU7
	IL4	P05112				WFDC12 C20orf122 WAP2 UNQ544/PRO844	WFD12_HUMAN	Q8WWY7
	IL4I1	Q96RQ9				LIPH LPDLR MPAPLA1 PLA1B	LIPH_HUMAN	Q8WWY8
	IL4R	P24394				IL1F10 FIL1T IL1HY2 IL38 FKSG75 UNQ6119/PRO20041	IL1FA_HUMAN	Q8WWZ1
	IL5	P05113				OIT3 LZP UNQ826/PRO1753	OIT3_HUMAN	Q8WWZ8
	IL5RA	Q01344				LCN9	LCN9_HUMAN	Q8WX39
	IL6	P05231				IGFBPL1 IGFBPRP4	IBPL1_HUMAN	Q8WX77
	IL6R	P08887				PATE1 PATE	PATE1_HUMAN	Q8WXA2
	IL6ST	P40189				SCG3 UNQ2502/PRO5990	SCG3_HUMAN	Q8WXD2
	IL7	P13232				RLN3 INSL7 RXN3 ZINS4 UNQ6188/PRO20213	REL3_HUMAN	Q8WXF3
	IL7R	P16871				MUC16 CA125	MUC16_HUMAN	Q8WXI7
	IL9	P15248				CPA5	CBPA5_HUMAN	Q8WXQ8
	ILDR1	Q86SU0				ADAMTS14	ATS14_HUMAN	Q8WXS8
	ILDR2	Q71H61				SMPDL3A ASML3A	ASM3A_HUMAN	Q92484
	ILVBL	A1L0T0				SMPDL3B ASML3B ASMLPD	ASM3B_HUMAN	Q92485
	IMP4	Q96G21				CFHR4 CFHL4 FHR4	FHR4_HUMAN	Q92496
	IMPG1	Q17R60				FAM3C ILEI GS3786	FAM3C_HUMAN	Q92520
	INHA	P05111				SPOCK2 KIAA0275 TICN2 UNQ269/PRO306	TICN2_HUMAN	Q92563
	INHBA	P08476				CCL17 SCYA17 TARC	CCL17_HUMAN	Q92583
	INHBB	P09529				PXDN KIAA0230 MG50 PRG2 VPO VPO1	PXDN_HUMAN	Q92626
	INHBC	P55103				SORL1 C11orf32	SORL_HUMAN	Q92673
	INHBE	P58166				HTRA1 HTRA PRSS11	HTRA1_HUMAN	Q92743
	INPP5A	Q14642				TNR	TENR_HUMAN	Q92752
	INS	P01308				FRZB FIZ FRE FRP FRZB1 SFRP3	SFRP3_HUMAN	Q92765
	INS-IGF2	F8WCM5				GGH	GGH_HUMAN	Q92820
	INSL3	P51460				NELL1 NRP1	NELL1_HUMAN	Q92832
	INSL4	Q14641				EDA ED1 EDA2	EDA_HUMAN	Q92838
	INSL5	Q9Y5Q6				DNASE1L2 DHP1 DNAS1L2	DNSL2_HUMAN	Q92874
	INSL6	Q9Y581				KLK6 PRSS18 PRSS9	KLK6_HUMAN	Q92876
	INTS3	Q68E01				PRG4 MSF SZP	PRG4_HUMAN	Q92954
	IPO11	Q9UI26				TNFRSF25 APO3 DDR3 DR3 TNFRSF12 WSL WSL1 UNQ455/PRO779	TNR25_HUMAN	Q93038
	IPO9	Q96P70				LPP	LPP_HUMAN	Q93052
	IQCF6	A8MYZ5				RNASE6 RNS6	RNAS6_HUMAN	Q93091
	IRAK3	Q9Y616				WNT2B WNT13	WNT2B_HUMAN	Q93097
	IRS4	O14654				WNT8B	WNT8B_HUMAN	Q93098
	ISLR	O14498				MR1	HMR1_HUMAN	Q95460
	ISLR2	Q6UXK2				TSLP	TSLP_HUMAN	Q969D9
	ISM1	B1AKI9				LEAP2	LEAP2_HUMAN	Q969E1
	ISM2	Q6H9L7				UCN3 SPC	UCN3_HUMAN	Q969E3
	ITGA4	P13612				MYDGF C19orf10 IL25	MYDGF_HUMAN	Q969H8
	ITGA9	Q13797				IL22RA2 UNQ5793/PRO19598/PRO19822	I22R2_HUMAN	Q969J5
	ITGAL	P20701				NXPE3 FAM55C MSTP115 UNQ5791/PRO19596	NXPE3_HUMAN	Q969Y0
	ITGAX	P20702				COL26A1 EMID2 EMU2	COQA1_HUMAN	Q96A83
	ITGB1	P05556				EMID1 EMU1	EMID1_HUMAN	Q96A84
	ITGB2	P05107				PTH2 TIP39 TIPF39	TIP39_HUMAN	Q96A98
	ITGB3	P05106				PTX4 C16orf38	PTX4_HUMAN	Q96A99
	ITGB7	P26010				ELSPBP1 E12	ESPB1_HUMAN	Q96BH3
	ITGBL1	O95965				FAM3D UNQ567/PRO1130	FAM3D_HUMAN	Q96BQ1
	ITIH1	P19827				CTHRC1 UNQ762/PRO1550	CTHR1_HUMAN	Q96CG8
	ITIH2	P19823				NTNG2 KIAA1857 LMNT2 UNQ9381/PRO34206	NTNG2_HUMAN	Q96CW9
	ITIH3	Q06033				ZG16B UNQ773/PRO1567	ZG16B_HUMAN	Q96DA0
	ITIH4	Q14624				VWCE URG11	VWCE_HUMAN	Q96DN2
	ITIH5	Q86UX2				BPIFA2 C20orf70 SPLUNC2 UNQ510/PRO1025	BPIA2_HUMAN	Q96DR5
	ITIH6	Q6UXX5				MUCL1 SBEM UNQ590/PRO1160	MUCL1_HUMAN	Q96DR8
	ITLN1	Q8WWA0				RSPRY1 KIAA1972 UNQ328/PRO444	RSPRY_HUMAN	Q96DX4
	ITLN2	Q8WWU7				CCDC126 UNQ786/PRO1605	CC126_HUMAN	Q96EE4
	IZUMO1R	A6ND01				IL17RA IL17R	I17RA_HUMAN	Q96F46
	IZUMO4	Q1ZYL8				MRAP2 C6orf117	MRAP2_HUMAN	Q96G30
	JAML	Q86YT9				ABHD17A C19orf27 FAM108A1	AB17A_HUMAN	Q96GS6
	JCHAIN	P01591				SFRP2 FRP2 SARP1 FKSG12 UNQ361/PRO697	SFRP2_HUMAN	Q96HF1
	JMJD8	Q96S16				KAZALD1 FKSG28 FKSG40 UNQ2945/PRO21184	KAZD1_HUMAN	Q96I82
	KANSL2	Q9H9L4				C14orf144	CN144_HUMAN	Q96I85
	KAZALD1	Q96I82				IGSF21	IGS21_HUMAN	Q96ID5
	KCNIP3	Q9Y2W7				LRCH3	LRCH3_HUMAN	Q96II8
	KCNK7	Q9Y2U2				CPB2	CBPB2_HUMAN	Q96IY4
	KCNN4	O15554				LOXL4 LOXC	LOXL4_HUMAN	Q96JB6
	KCNU1	A8MYU2				HHIPL1 HHIP2 KIAA1822 UNQ9245/PRO34761	HIPL1_HUMAN	Q96JK4
	KCP	Q6ZWJ8				CNDP1 CN1 CPGL2 UNQ1915/PRO4380	CNDP1_HUMAN	Q96KN2
	KDELC1	Q6UW63				SPACA7 C13orf28	SPAC7_HUMAN	Q96KW9
	KDELC2	Q7Z4H8				LYZL4 LYC4	LYZL4_HUMAN	Q96KX0
	KDM1A	O60341				LLCFC1 C7orf34	LCFC1_HUMAN	Q96L11
	KDM3B	Q7LBC6				ART5 UNQ575/PRO1137	NAR5_HUMAN	Q96L15
	KDM6A	O15550				PGLYRP4 PGRPIB SBBI67	PGRP4_HUMAN	Q96LB8
	KDM7A	Q6ZMT4				PGLYRP3 PGRPIA	PGRP3_HUMAN	Q96LB9
	KDSR	Q06136				SIGLEC10 SLG2 UNQ477/PRO940	SIG10_HUMAN	Q96LC7
	KERA	O60938				FAM19A4 TAFA4	F19A4_HUMAN	Q96LR4
	KIAA0100	Q14667				FAM20A UNQ9388/PRO34279	FA20A_HUMAN	Q96MK3
	KIAA0319	Q5VV43				GLT1D1	GL1D1_HUMAN	Q96MS3
	KIAA1324	Q6UXG2				C17orf77	CQ077_HUMAN	Q96MU5
	KIFC2	Q96AC6				NECTIN4 LNIR PRR4 PVRL4	NECT4_HUMAN	Q96NY8
	KIR2DL4	Q99706				WFIKKN1 C16orf12 GASP2 WFIKKN PSEC0040	WFKN1_HUMAN	Q96NZ8
	KIR3DX1	Q9H7L2				PRAP1 UPA UNQ608/PRO1195	PRAP1_HUMAN	Q96NZ9
	KIRREL2	Q6UWL6				COL21A1 COL1AL FP633	COLA1_HUMAN	Q96P44
	KISS1	Q15726				OLFM3 NOE3 UNQ1924/PRO4399	NOE3_HUMAN	Q96PB7
	KLHL11	Q9NVR0				MIA2	MIA2_HUMAN	Q96PC5
	KLHL22	Q53GT1				IL17F	IL17F_HUMAN	Q96PD4
	KLK1	P06870				PGLYRP2 PGLYRPL PGRPL UNQ3103/PRO10102	PGRP2_HUMAN	Q96PD5
	KLK10	O43240				DEFB118 C20orf63 DEFB18 ESC42	DB118_HUMAN	Q96PH6
	KLK11	Q9UBX7				SCGB3A2 PNSP1 UGRP1 UNQ566/PRO1128	SG3A2_HUMAN	Q96PL1
	KLK12	Q9UKR0				TECTB	TECTB_HUMAN	Q96PL2
	KLK13	Q9UKR3				SPACA5 LYZL5 SPACA5A UNQ6288/PRO20753; SPACA5B	LYZL5_HUMAN	Q96QH8
	KLK14	Q9P0G3				SCGB3A1 HIN1 PNSP2 UGRP2 UNQ629/PRO1245	SG3A1_HUMAN	Q96QR1
	KLK15	Q9H2R5				PCDH15 USH1F	PCD15_HUMAN	Q96QU1
	KLK2	P20151				UCN2 SRP URP	UCN2_HUMAN	Q96RP3
	KLK3	P07288				HMCN1 FIBL6	HMCN1_HUMAN	Q96RW7
	KLK4	Q9Y5K2				NODAL	NODAL_HUMAN	Q96S42
	KLK5	Q9Y337				HAPLN3 EXLD1 UNQ238/PRO271	HPLN3_HUMAN	Q96S86
	KLK6	Q92876				GPX7 GPX6 UNQ469/PRO828	GPX7_HUMAN	Q96SL4
	KLK7	P49862				CPXM1 CPX1 CPXM UNQ3015/PRO9782	CPXM1_HUMAN	Q96SM3
	KLK8	O60259				GPHA2 GPA2 ZSIG51	GPHA2_HUMAN	Q96T91
	KLK9	Q9UKQ9				AMELX AMG AMGX	AMELX_HUMAN	Q99217
	KLKB1	P03952				AMELY AMGL AMGY	AMELY_HUMAN	Q99218
	KMT5A	Q9NQR1				NELL2 NRP2	NELL2_HUMAN	Q99435
	KNDC1	Q76NI1				SDF2	SDF2_HUMAN	Q99470
	KNG1	P01042				SORT1	SORT_HUMAN	Q99523
	KRBA2	Q6ZNG9				MMP19 MMP18 RASI	MMP19_HUMAN	Q99542
	KREMEN2	Q8NCW0				SERPINI1 PI12	NEUS_HUMAN	Q99574
	KRTDAP	P60985				S100A13	S10AD_HUMAN	Q99584
	L1CAM	P32004				CCL13 MCP4 NCC1 SCYA13	CCL13_HUMAN	Q99616
	L3MBTL2	Q969R5				EPYC DSPG3 PGLB SLRR3B	EPYC_HUMAN	Q99645
	LACE1	Q8WV93				CGREF1 CGR11	CGRE1_HUMAN	Q99674
	LACRT	Q9GZZ8				COL12A1 COL12A1L	COCA1_HUMAN	Q99715
	LACTB	P83111				TIMP4	TIMP4_HUMAN	Q99727
	LAG3	P18627				CCL19 ELC MIP3B SCYA19	CCL19_HUMAN	Q99731
	LAIR2	Q6ISS4				NRTN	NRTN_HUMAN	Q99748
	LALBA	P00709				OLFM1 NOE1 NOEL1	NOE1_HUMAN	Q99784
	LAMA1	P25391				OPRPN BPLP PROL1	PROL1_HUMAN	Q99935
	LAMA2	P24043				EGFL8 C6orf8 NG3 UNQ8752/PRO29920	EGFL8_HUMAN	Q99944
	LAMA3	Q16787				SMR3A PBI PROL5	SMR3A_HUMAN	Q99954
	LAMA4	Q16363				RARRES2 TIG2	RARR2_HUMAN	Q99969
	LAMA5	O15230				MYOC GLC1A TIGR	MYOC_HUMAN	Q99972
	LAMB1	P07942				OMD SLRR2C UNQ190/PRO216	OMD_HUMAN	Q99983
	LAMB2	P55268				SEMA3C SEMAE	SEM3C_HUMAN	Q99985
	LAMB3	Q13751				GDF15 MIC1 PDF PLAB PTGFB	GDF15_HUMAN	Q99988
	LAMB4	A4D0S4				APOL4	APOL4_HUMAN	Q9BPW4
	LAMC1	P11047				RETNLB CCRG FIZZ2 HXCP2 RETNL2 UNQ408/PRO770	RETNB_HUMAN	Q9BQ08
	LAMC2	Q13753				SPOCK3 TICN3 UNQ409/PRO771	TICN3_HUMAN	Q9BQ16
	LAMC3	Q9Y6N6				SOST UNQ2976/PRO7455/PRO7476	SOST_HUMAN	Q9BQB4
	LAMP3	Q9UQV4				CCDC3	CCDC3_HUMAN	Q9BQI4
	LARGE2	Q8N3Y3				BPIFA3 C20orf71 SPLUNC3	BPIA3_HUMAN	Q9BQP9
	LAT	O43561				PRSS27 MPN UNQ1884/PRO4327	PRS27_HUMAN	Q9BQR3
	LAT2	Q9GZY6				WFDC6 C20orf171 WAP6	WFDC6_HUMAN	Q9BQY6
	LBP	P18428				ADPGK PSEC0260	ADPGK_HUMAN	Q9BRR6
	LCAT	P04180				ZPBP ZPBP1	ZPBP1_HUMAN	Q9BS86
	LCN1	P31025				PRADC1 C2orf7 PAP21 UNQ833/PRO1760	PADC1_HUMAN	Q9BSG0
	LCN10	Q6JVE6				RTBDN	RTBDN_HUMAN	Q9BSG5
	LCN12	Q6JVE5				SPX C12orf39	SPXN_HUMAN	Q9BT56
	LCN15	Q6UWW0				NDFIP1 N4WBP5 PSEC0192 PSEC0223	NFIP1_HUMAN	Q9BT67
	LCN2	P80188				FUCA2 PSEC0151 UNQ227/PRO260	FUCO2_HUMAN	Q9BTY2
	LCN6	P62502				CHRDL1 NRLN1	CRDL1_HUMAN	Q9BU40
	LCN8	Q6JVE9				SPON2 DIL1 UNQ435/PRO866	SPON2_HUMAN	Q9BUD6
	LCN9	Q8WX39				MENT C1orf56 UNQ547/PRO1104	MENT_HUMAN	Q9BUN1
	LCORL	Q8N3X6				APOO FAM121B MIC23 MIC26 My025 UNQ1866/PRO4302	MIC26_HUMAN	Q9BUR5
	LDLR	P01130				EDEM2 C20orf31 C20orf49 UNQ573/PRO1135	EDEM2_HUMAN	Q9BV94
	LDLRAD2	Q5SZI1				COLEC11 UNQ596/PRO1182	COL11_HUMAN	Q9BWP8
	LEAP2	Q969E1				CHID1 GL008 PSEC0104 SB139	CHID1_HUMAN	Q9BWS9
	LECT2	O14960				JAM3 UNQ859/PRO1868	JAM3_HUMAN	Q9BX67
	LEFTY1	O75610				PLA2G12B PLA2G13 FKSG71	PG12B_HUMAN	Q9BX93
	LEFTY2	O00292				C1QTNF6 CTRP6 UNQ581/PRO1151	C1QT6_HUMAN	Q9BXI9
	LEP	P41159				C1QTNF5 CTRP5 UNQ303/PRO344	C1QT5_HUMAN	Q9BXJ0
	LFNG	Q8NES3				C1QTNF1 CTRP1 UNQ310/PRO353	C1QT1_HUMAN	Q9BXJ1
	LGALS3BP	Q08380				C1QTNF7 CTRP7	C1QT7_HUMAN	Q9BXJ2
	LGI1	O95970				C1QTNF4 CTRP4	C1QT4_HUMAN	Q9BXJ3
	LGI2	Q8N0V4				C1QTNF3 CTRP3 UNQ753/PRO1484	C1QT3_HUMAN	Q9BXJ4
	LGI3	Q8N145				C1QTNF2 CTRP2 UNQ6349/PRO21054	C1QT2_HUMAN	Q9BXJ5
	LGI4	Q8N135				ASPN PLAP1 SLRR1C UNQ215/PRO241	ASPN_HUMAN	Q9BXN1
	LGMN	Q99538				PAPPA2 PLAC3	PAPP2_HUMAN	Q9BXP8
	LGR4	Q9BXB1				CFHR5 CFHL5 FHR5	FHR5_HUMAN	Q9BXR6
	LHB	P01229				COL25A1	COPA1_HUMAN	Q9BXS0
	LHCGR	P22888				EMILIN2	EMIL2_HUMAN	Q9BXX0
	LIF	P15018				RSPO3 PWTSR THSD2	RSPO3_HUMAN	Q9BXY4
	LIFR	P42702				ADGRE3 EMR3 UNQ683/PRO1562	AGRE3_HUMAN	Q9BY15
	LILRA2	Q8N149				ANGPTL4 ARP4 HFARP PGAR PP1158 PSEC0166 UNQ171/PRO197	ANGL4_HUMAN	Q9BY76
	LILRB3	O75022				FGFBP2 KSP37 UNQ425/PRO1065	FGFP2_HUMAN	Q9BYJ0
	LIME1	Q9H400				DEFB126 C20orf8 DEFB26	DB126_HUMAN	Q9BYW3
	LINC01125	A0A1B0GVN3				REG4 GISP RELP	REG4_HUMAN	Q9BYZ8
	LINGO1	Q96FE5				CNTNAP3 CASPR3 KIAA1714	CNTP3_HUMAN	Q9BZ76
	LIPA	P38571				SLURP2	SLUR2_HUMAN	P0DP57
	LIPC	P11150				LYNX1	LYNX1_HUMAN	P0DP58
	LIPF	P07098				TPSD1	TRYD_HUMAN	Q9BZJ3
	LIPG	Q9Y5X9				PLA2G12A PLA2G12 FKSG38 UNQ2519/PRO6012	PG12A_HUMAN	Q9BZM1
	LIPH	Q8WWY8				PLA2G2F	PA2GF_HUMAN	Q9BZM2
	LIPK	Q5VXJ0				ULBP2 N2DL2 RAET1H UNQ463/PRO791	ULBP2_HUMAN	Q9BZM5
	LIPM	Q5VYY2				SIGLEC1 SN	SN_HUMAN	Q9BZZ2
	LIPN	Q5VXI9				BRINP2 DBCCR1L2 FAM5B KIAA1747	BRNP2_HUMAN	Q9C0B6
	LMAN2	Q12907				TINAGL1 GIS5 LCN7 OLRG2 TINAGL PP6614 PSEC0088 UNQ204/PRO230	TINAL_HUMAN	Q9GZM7
	LMNTD1	Q8N9Z9				PRSS22 BSSP4 PRSS26 SP001LA UNQ302/PRO343	BSSP4_HUMAN	Q9GZN4
	LNX1	Q8TBB1				PDGFD IEGF SCDGFB MSTP036 UNQ1899/PRO4345	PDGFD_HUMAN	Q9GZP0
	LOX	P28300				WNT10A	WN10A_HUMAN	Q9GZT5
	LOXL1	Q08397				NYX CLRP	NYX_HUMAN	Q9GZU5
	LOXL2	Q9Y4K0				HAPLN2 BRAL1	HPLN2_HUMAN	Q9GZV7
	LOXL3	P58215				FGF23 HYPF UNQ3027/PRO9828	FGF23_HUMAN	Q9GZV9
	LOXL4	Q96JB6				IL22 ILTIF ZCYTO18 UNQ3099/PRO10096	IL22_HUMAN	Q9GZX6
	LPA	P08519				TWSG1 TSG PSEC0250	TWSG1_HUMAN	Q9GZX9
	LPL	P06858				GFRA4	GFRA4_HUMAN	Q9GZZ7
	LPO	P22079				LACRT	LACRT_HUMAN	Q9GZZ8
	LRAT	O95237				CRISPLD2 CRISP11 LCRISP2 UNQ2914/PRO1156/PRO9783	CRLD2_HUMAN	Q9H0B8
	LRCH3	Q96II8				SIRPD PTPNS1L2	SIRPD_HUMAN	Q9H106
	LRCOL1	A6NCL2				CSTL1	CSTL1_HUMAN	Q9H114
	LRFN4	Q6PJG9				RNASE7 UNQ2516/PRO6006	RNAS7_HUMAN	Q9H1E1
	LRFN5	Q96NI6				WFDC10A C20orf146 WAP10	WF10A_HUMAN	Q9H1F0
	LRG1	P02750				WNT8A WNT8D	WNT8A_HUMAN	Q9H1J5
	LRP1	Q07954				WNT5B	WNT5B_HUMAN	Q9H1J7
	LRP11	Q86VZ4				DEFB129 C20orf87 DEFB29 UNQ5794/PRO19599	DB129_HUMAN	Q9H1M3
	LRP1B	Q9NZR2				DEFB127 C20orf73 DEFB27 UNQ1956/PRO6071	DB127_HUMAN	Q9H1M4
	LRP2	P98164				C2orf40 ECRG4 UNQ761/PRO1508	AUGN_HUMAN	Q9H1Z8
	LRP4	O75096				MMP28 MMP25 UNQ1893/PRO4339	MMP28_HUMAN	Q9H239
	LRPAP1	P30533				IL25 IL17E UNQ3120/PRO10272	IL25_HUMAN	Q9H293
	LRRC17	Q8N6Y2				CXCL16 SCYB16 SRPSOX UNQ2759/PRO6714	CXL16_HUMAN	Q9H2A7
	LRRC32	Q14392				KLK15	KLK15_HUMAN	Q9H2R5
	LRRC3B	Q96PB8				CHRD UNQ217/PRO243	CHRD_HUMAN	Q9H2X0
	LRRC4B	Q9NT99				CLEC4M CD209L CD209L1 CD299	CLC4M_HUMAN	Q9H2X3
	LRRC70	Q7Z2Q7				MMP27 UNQ2503/PRO5992	MMP27_HUMAN	Q9H306
	LRRN3	Q9H3W5				ADAMTS10	ATS10_HUMAN	Q9H324
	LRRTM1	Q86UE6				CRISPLD1 CRISP10 LCRISP1 UNQ342/PRO541	CRLD1_HUMAN	Q9H336
	LRRTM2	O43300				SNX25 MSTP043	SNX25_HUMAN	Q9H3E2
	LRRTM4	Q86VH4				MUC13 DRCC1 RECC UNQ6194/PRO20221	MUC13_HUMAN	Q9H3R2
	LRTM2	Q8N967				SMOC2 SMAP2 MSTP117	SMOC2_HUMAN	Q9H3U7
	LSR	Q86X29				R3HDML	CRSPL_HUMAN	Q9H3Y0
	LST1	O00453				RNPEP APB	AMPB_HUMAN	Q9H4A4
	LTA	P01374				SMOC1	SMOC1_HUMAN	Q9H4F8
	LTBP1	Q14766				CST9L CTES7B UNQ1835/PRO3543	CST9L_HUMAN	Q9H4G1
	LTBP2	Q14767				CDCP1 TRASK UNQ2486/PRO5773	CDCP1_HUMAN	Q9H5V8
	LTBP3	Q9NS15				EPHX3 ABHD9	EPHX3_HUMAN	Q9H6B9
	LTBP4	Q8N2S1				CCDC134	CC134_HUMAN	Q9H6E4
	LTBR	P36941				C12orf49	CL049_HUMAN	Q9H741
	LTF	P02788				GREM2 CKTSF1B2 DAND3 PRDC	GREM2_HUMAN	Q9H772
	LTK	P29376				C7orf69	CG069_HUMAN	Q9H7B7
	LUM	P51884				KIR3DX1 KIR3DL0 LENG12	KI3X1_HUMAN	Q9H7L2
	LUZP2	Q86TE4				CXorf36 DIA1R UNQ1862/PRO3743	DIA1R_HUMAN	Q9H7Y0
	LVRN	Q6Q4G3				MMRN2 EMILIN3	MMRN2_HUMAN	Q9H8L6
	LY6E	Q16553				C14orf93	CN093_HUMAN	Q9H972
	LY6G5B	Q8NDX9				FKRP	FKRP_HUMAN	Q9H9S5
	LY6G6D	O95868				SIAE YSG2	SIAE_HUMAN	Q9HAT2
	LY6G6E	Q5SQ64				SCPEP1 RISC SCP1 MSTP034 UNQ265/PRO302	RISC_HUMAN	Q9HB40
	LY6H	O94772				NTN4	NET4_HUMAN	Q9HB63
	LY6K	Q17RY6				IL21	IL21_HUMAN	Q9HBE4
	LY6L	H3BQJ8				PLAC1	PLAC1_HUMAN	Q9HBJ0
	LY86	O95711				PROK2 BV8	PROK2_HUMAN	Q9HC23
	LY96	Q9Y6Y9				WFDC1 PS20	WFDC1_HUMAN	Q9HC57
	LYG1	Q8N1E2				CRLF2 CRL2 ILXR TSLPR	CRLF2_HUMAN	Q9HC73
	LYG2	Q86SG7				MUC5B MUC5	MUC5B_HUMAN	Q9HC84
	LYNX1	P0DP58				SPON1 KIAA0762 VSGP	SPON1_HUMAN	Q9HCB6
	LYPD1	Q8N2G4				NPVF C7orf9 RFRP	NPVF_HUMAN	Q9HCQ7
	LYPD2	Q6UXB3				FGF22 UNQ2500/PRO5800	FGF22_HUMAN	Q9HCT0
	LYPD4	Q6UWN0				RETN FIZZ3 HXCP1 RSTN UNQ407/PRO1199	RETN_HUMAN	Q9HD89
	LYPD6	Q86Y78				TUFT1	TUFT1_HUMAN	Q9NNX1
	LYPD6B	Q8NI32				CD209 CLEC4L	CD209_HUMAN	Q9NNX6
	LYPD8	Q6UX82				BPIFA1 LUNX NASG PLUNC SPLUNC1 SPURT UNQ787/PRO1606	BPIA1_HUMAN	Q9NP55
	LYZ	P61626				AMBN	AMBN_HUMAN	Q9NP70
	LYZL4	Q96KX0				FGF20	FGF20_HUMAN	Q9NP95
	LYZL6	O75951				TREM1	TREM1_HUMAN	Q9NP99
	M6PR	P20645				MMP25 MMP20 MMPL1 MT6MMP	MMP25_HUMAN	Q9NPA2
	MAD1L1	Q9Y6D9				NGRN FI58G HT020	NGRN_HUMAN	Q9NPE2
	MAG	P20916				IL23A SGRF UNQ2498/PRO5798	IL23A_HUMAN	Q9NPF7
	MAGT1	Q9H0U3				IL1RAP C3orf13 IL1R3	IL1AP_HUMAN	Q9NPH3
	MALSU1	Q96EH3				OBP2B UNQ653/PRO1283	OBP2B_HUMAN	Q9NPH6
	MAMDC2	Q7Z304				IL26 AK155	IL26_HUMAN	Q9NPH9
	MAN2B1	O00754				ESM1	ESM1_HUMAN	Q9NQ30
	MAN2B2	Q9Y2E5				SCUBE2 CEGP1	SCUB2_HUMAN	Q9NQ36
	MANBA	O00462				SPINK5	ISK5_HUMAN	Q9NQ38
	MANEAL	Q5VSG8				MEPE	MEPE_HUMAN	Q9NQ76
	MANF	P55145				CRTAC1 ASPIC1 CEP68	CRAC1_HUMAN	Q9NQ79
	MANSC1	Q9H8J5				CD163L1 CD163B M160 UNQ6434/PRO23202	C163B_HUMAN	Q9NR16
	MAP3K9	P80192				GDF3 UNQ222/PRO248	GDF3_HUMAN	Q9NR23
	MASP1	P48740				ASAH2 HNAC1	ASAH2_HUMAN	Q9NR71
	MASP2	O00187				MXRA5	MXRA5_HUMAN	Q9NR99
	MATN1	P21941				PDGFC SCDGF UNQ174/PRO200	PDGFC_HUMAN	Q9NRA1
	MATN2	O00339				OTOR FDP MIAL UNQ3054/PRO9873	OTOR_HUMAN	Q9NRC9
	MATN3	O15232				MMP26	MMP26_HUMAN	Q9NRE1
	MATN4	O95460				PYY2	PYY2_HUMAN	Q9NRI6
	MATR3	P43243				CCL28 SCYA28	CCL28_HUMAN	Q9NRJ3
	MAU2	Q9Y6X3				ENAM	ENAM_HUMAN	Q9NRM1
	MAZ	P56270				IL17RB CRL4 EVI27 IL17BR UNQ2501/PRO19612	I17RB_HUMAN	Q9NRM6
	MBD6	Q96DN6				OLFML3 PSEC0035 PSEC0173 PSEC0244 UNQ663/PRO1294	OLFL3_HUMAN	Q9NRN5
	MBL2	P11226				CYTL1 C4orf4 UNQ1942/PRO4425	CYTL1_HUMAN	Q9NRR1
	MBNL1	Q9NR56				LTBP3	LTBP3_HUMAN	Q9NS15
	MCCC1	Q96RQ3				THSD1 TMTSP UNQ3010/PRO9769	THSD1_HUMAN	Q9NS62
	MCCD1	P59942				GKN1 AMP18 CA11 UNQ489/PRO1005	GKN1_HUMAN	Q9NS71
	MCEE	Q96PE7				SEMA3G	SEM3G_HUMAN	Q9NS98
	MCF2L	O15068				FGF21 UNQ3115/PRO10196	FGF21_HUMAN	Q9NSA1
	MCFD2	Q8NI22				EMILIN3 C20orf130 EMILIN5	EMIL3_HUMAN	Q9NT22
	MDFIC	Q9P1T7				CBLN4 CBLNL1 UNQ718/PRO1382	CBLN4_HUMAN	Q9NTU7
	MDGA1	Q8NFP4				SPATA6	SPAT6_HUMAN	Q9NWH7
	MDK	P21741				GFOD1 C6orf114	GFOD1_HUMAN	Q9NXC2
	MED20	Q9H944				OBP2A	OBP2A_HUMAN	Q9NY56
	MEGF10	Q96KG7				VNN3	VNN3_HUMAN	Q9NY84
	MEGF6	O75095				IL20 ZCYTO10 UNQ852/PRO1801	IL20_HUMAN	Q9NYY1
	MEI1	Q5TIA1				PLA2G3	PA2G3_HUMAN	Q9NZ20
	MEI4	A8MW99				TREM2	TREM2_HUMAN	Q9NZC2
	MEIS1	O00470				IL37 FIL1Z IL1F7 IL1H4 IL1RP1	IL37_HUMAN	Q9NZH6
	MEIS3	Q99687				IL36B IL1F8 IL1H2	IL36B_HUMAN	Q9NZH7
	MELTF	P08582				IL36G IL1E IL1F9 IL1H1 IL1RP2 UNQ2456/PRO5737	IL36G_HUMAN	Q9NZH8
	MEPE	Q9NQ76				ADA2 ADGF CECR1 IDGFL	ADA2_HUMAN	Q9NZK5
	MESDC2	Q14696				PLA2G2E	PA2GE_HUMAN	Q9NZK7
	MEST	Q5EB52				C1RL C1RL1 C1RLP CLSPA	C1RL_HUMAN	Q9NZP8
	MET	P08581				DSPP	DSPP_HUMAN	Q9NZW4
	METRN	Q9UJH8				KLK14 KLKL6	KLK14_HUMAN	Q9P0G3
	METRNL	Q641Q3				IL17C UNQ561/PRO1122	IL17C_HUMAN	Q9P0M4
	METTL17	Q9H7H0				IFNK UNQ6124/PRO20084	IFNK_HUMAN	Q9P0W0
	METTL24	Q5JXM2				PRO2829	YN010_HUMAN	Q9P1C3
	METTL7B	Q6UX53				COL20A1 KIAA1510	COKA1_HUMAN	Q9P218
	METTL9	Q9H1A3				TXNDC16 ERP90 KIAA1344	TXD16_HUMAN	Q9P2K2
	MEX3C	Q5U5Q3				ADAMTS9 KIAA1312	ATS9_HUMAN	Q9P2N4
	MFAP2	P55001				GALP	GALP_HUMAN	Q9UBC7
	MFAP3	P55082				XCL2 SCYC2	XCL2_HUMAN	Q9UBD3
	MFAP3L	O75121				CLCF1 BSF3 CLC NNT1	CLCF1_HUMAN	Q9UBD9
	MFAP4	P55083				IL36RN FIL1D IL1F5 IL1HY1 IL1L1 IL1RP3 UNQ1896/PRO4342	I36RA_HUMAN	Q9UBH0
	MFAP5	Q13361				OPTC OPT	OPT_HUMAN	Q9UBM4
	MFGE8	Q08431				DKK3 REIC UNQ258/PRO295	DKK3_HUMAN	Q9UBP4
	MFNG	O00587				EXTL2 EXTR2	EXTL2_HUMAN	Q9UBQ6
	MGA	Q8IWI9				GABBR1 GPRC3A	GABR1_HUMAN	Q9UBS5
	MGAT2	Q10469				DKK4	DKK4_HUMAN	Q9UBT3
	MGAT3	Q09327				DKK2 UNQ682/PRO1316	DKK2_HUMAN	Q9UBU2
	MGAT4A	Q9UM21				GHRL MTLRP UNQ524/PRO1066	GHRL_HUMAN	Q9UBU3
	MGAT4B	Q9UQ53				WNT16	WNT16_HUMAN	Q9UBV4
	MGAT4D	A6NG13				FBLN5 DANCE UNQ184/PRO210	FBLN5_HUMAN	Q9UBX5
	MGP	P08493				KL	KLOT_HUMAN	Q9UEF7
	MGST2	Q99735				TP73-AS1 KIAA0495 PDAM	T73AS_HUMAN	Q9UF72
	MIA	Q16674				FAM198A C3orf41	F198A_HUMAN	Q9UFP1
	MIA2	Q96PC5				DMBT1 GP340	DMBT1_HUMAN	Q9UGM3
	MIA3	Q5JRA6				FETUB	FETUB_HUMAN	Q9UGM5
	MICU1	Q9BPX6				IL36A FIL1E IL1E IL1F6	IL36A_HUMAN	Q9UHA7
	MIER1	Q8N108				IL19 ZMDA1	IL19_HUMAN	Q9UHD0
	MINPP1	Q9UNW1				TAC3 NKNB UNQ585/PRO1155	TKNK_HUMAN	Q9UHF0
	MLEC	Q14165				EGFL7 MEGF7 UNQ187/PRO1449	EGFL7_HUMAN	Q9UHF1
	MLN	P12872				IL17B IL20 NIRF ZCYTO7 UNQ516/PRO1031	IL17B_HUMAN	Q9UHF5
	MLXIP	Q9HAP2				PCSK1N	PCSK1_HUMAN	Q9UHG2
	MLXIPL	Q9NP71				ADAMTS1 KIAA1346 METH1	ATS1_HUMAN	Q9UHI8
	MMP1	P03956				DPP7 DPP2 QPP	DPP2_HUMAN	Q9UHL4
	MMP10	P09238				CPA4 CPA3 UNQ694/PRO1339	CBPA4_HUMAN	Q9UI42
	MMP11	P24347				PSORS1C2 C6orf17 SPR1	PS1C2_HUMAN	Q9UIG4
	MMP12	P39900				TMEFF2 HPP1 TENB2 TPEF UNQ178/PRO204	TEFF2_HUMAN	Q9UIK5
	MMP13	P45452				LNPEP OTASE	LCAP_HUMAN	Q9UIQ6
	MMP14	P50281				ENPP5 UNQ550/PRO1107	ENPP5_HUMAN	Q9UJA9
	MMP17	Q9ULZ9				METRN C16orf23 RJD6	METRN_HUMAN	Q9UJH8
	MMP19	Q99542				GNPTG C16orf27 GNPTAG CAB56184 LP2537	GNPTG_HUMAN	Q9UJJ9
	MMP2	P08253				TINAG	TINAG_HUMAN	Q9UJW2
	MMP20	O60882				GDF2 BMP9	GDF2_HUMAN	Q9UK05
	MMP21	Q8N119				SERPINA10 ZPI UNQ707/PRO1358	ZPI_HUMAN	Q9UK55
	MMP25	Q9NPA2				DKKL1 SGY1 UNQ735/PRO1429	DKKL1_HUMAN	Q9UK85
	MMP26	Q9NRE1				PILRA	PILRA_HUMAN	Q9UKJ1
	MMP27	Q9H306				ADAMTS7	ATS7_HUMAN	Q9UKP4
	MMP28	Q9H239				ADAMTS6	ATS6_HUMAN	Q9UKP5
	MMP3	P08254				ADAM28 ADAM23 MDCL	ADA28_HUMAN	Q9UKQ2
	MMP7	P09237				KLK9	KLK9_HUMAN	Q9UKQ9
	MMP8	P22894				KLK12 KLKL5 UNQ669/PRO1303	KLK12_HUMAN	Q9UKR0
	MMP9	P14780				KLK13 KLKL4	KLK13_HUMAN	Q9UKR3
	MMRN1	Q13201				ANGPTL2 ARP2 UNQ170/PRO196	ANGL2_HUMAN	Q9UKU9
	MMRN2	Q9H8L6				CES1P1 CES4	CES1P_HUMAN	Q9UKY3
	MOXD1	Q6UVY6				PCOLCE2 PCPE2 UNQ250/PRO287	PCOC2_HUMAN	Q9UKZ9
	MPIG6B	O95866				TMPRSS11E DESC1 TMPRSS11E2 UNQ742/PRO1461	TM11E_HUMAN	Q9UL52
	MPO	P05164				EMCN EMCN2 MUC14	MUCEN_HUMAN	Q9ULC0
	MPPED1	O15442				HEG1 KIAA1237	HEG1_HUMAN	Q9ULI3
	MPZL1	O95297				APLN APEL	APEL_HUMAN	Q9ULZ1
	MR1	Q95460				MMP17 MT4MMP	MMP17_HUMAN	Q9ULZ9
	MRPL2	Q5T653				MGAT4A	MGT4A_HUMAN	Q9UM21
	MRPL21	Q7Z2W9				EPDR1 MERP1 UCC1	EPDR1_HUMAN	Q9UM22
	MRPL22	Q9NWU5				COL17A1 BP180 BPAG2	COHA1_HUMAN	Q9UMD9
	MRPL24	Q96A35				NENF CIR2 SPUF	NENF_HUMAN	Q9UMX5
	MRPL27	Q9P0M9				PCDHA6 CNRS2	PCDA6_HUMAN	Q9UN73
	MRPL32	Q9BYC8				ADAMTS5 ADAMTS11 ADMP2	ATS5_HUMAN	Q9UNA0
	MRPL34	Q9BQ48				CELA1 ELA1	CELA1_HUMAN	Q9UNI1
	MRPL35	Q9NZE8				PLA2G2D SPLASH	PA2GD_HUMAN	Q9UNK4
	MRPL52	Q86TS9				ADAMTS8 METH2	ATS8_HUMAN	Q9UP79
	MRPL55	Q7Z7F7				THSD7A KIAA0960	THS7A_HUMAN	Q9UPZ6
	MRPS14	O60783				PSG11 PSG13 PSG14	PSG11_HUMAN	Q9UQ72
	MRPS22	P82650				PSG8	PSG8_HUMAN	Q9UQ74
	MRPS28	Q9Y2Q9				CLCA2 CACC3	CLCA2_HUMAN	Q9UQC9
	MS4A14	Q96JA4				TNN TNW	TENN_HUMAN	Q9UQP3
	MS4A3	Q96HJ5				CLEC11A CLECSF3 LSLCL SCGF	CLC11_HUMAN	Q9Y240
	MSH3	P20585				HPSE HEP HPA HPA1 HPR1 HPSE1 HSE1	HPSE_HUMAN	Q9Y251
	MSH5	O43196				CCL26 SCYA26 UNQ216/PRO242	CCL26_HUMAN	Q9Y258
	MSLN	Q13421				ANGPT4 ANG3 ANG4	ANGP4_HUMAN	Q9Y264
	MSMB	P08118				TNFSF13B BAFF BLYS TALL1 TNFSF20 ZTNF4 UNQ401/PRO738	TN13B_HUMAN	Q9Y275
	MSRA	Q9UJ68				ITM2B BRI BRI2	ITM2B_HUMAN	Q9Y287
	MSRB2	Q9Y3D2				MAN2B2 KIAA0935	MA2B2_HUMAN	Q9Y2E5
	MSRB3	Q8IXL7				NTNG1 KIAA0976 LMNT1 UNQ571/PRO1133	NTNG1_HUMAN	Q9Y2I2
	MST1	P26927				VWA7 C6orf27 G7C NG37	VWA7_HUMAN	Q9Y334
	MSTN	O14793				KLK5 SCTE UNQ570/PRO1132	KLK5_HUMAN	Q9Y337
	MT1G	P13640				BOLA1 CGI-143	BOLA1_HUMAN	Q9Y3E2
	MTHFD2	P13995				C2CD2 C21orf25 C21orf258 TMEM24L	C2CD2_HUMAN	Q9Y426
	MTMR14	Q8NCE2				LOXL2	LOXL2_HUMAN	Q9Y4K0
	MTRNR2L11	S4R3Y5				CCL27 ILC SCYA27	CCL27_HUMAN	Q9Y4X3
	MTRR	Q9UBK8				INSL6 RIF1	INSL6_HUMAN	Q9Y581
	MTTP	P55157				ANGPTL3 ANGPT5 UNQ153/PRO179	ANGL3_HUMAN	Q9Y5C1
	MTX2	O75431				PCDHA10 CNRS8	PCDAA_HUMAN	Q9Y5I2
	MUC1	P15941				PCDHA1	PCDA1_HUMAN	Q9Y5I3
	MUC13	Q9H3R2				KLK4 EMSP1 PRSS17 PSTS	KLK4_HUMAN	Q9Y5K2
	MUC20	Q8N307				HILPDA C7orf68 HIG2	HLPDA_HUMAN	Q9Y5L2
	MUC3A	Q02505				CORIN CRN TMPRSS10	CORIN_HUMAN	Q9Y5Q5
	MUC5AC	P98088				INSL5 UNQ156/PRO182	INSL5_HUMAN	Q9Y5Q6
	MUC5B	Q9HC84				MMP24 MT5MMP	MMP24_HUMAN	Q9Y5R2
	MUC6	Q6W4X9				TNFRSF18 AITR GITR UNQ319/PRO364	TNR18_HUMAN	Q9Y5U5
	MUC7	Q8TAX7				WIF1 UNQ191/PRO217	WIF1_HUMAN	Q9Y5W5
	MUCL1	Q96DR8				LIPG UNQ387/PRO719	LIPE_HUMAN	Q9Y5X9
	MXRA5	Q9NR99				SCN10A	SCNAA_HUMAN	Q9Y5Y9
	MXRA7	P84157				GPC6 UNQ369/PRO705	GPC6_HUMAN	Q9Y625
	MYDGF	Q969H8				CPQ LCH1 PGCP	CBPQ_HUMAN	Q9Y646
	MYL1	P05976				ADGRG1 GPR56 TM7LN4 TM7XN1 UNQ540/PRO1083	AGRG1_HUMAN	Q9Y653
	MYOC	Q99972				EMILIN1 EMI	EMIL1_HUMAN	Q9Y6C2
	MYRFL	Q96LU7				WNT6	WNT6_HUMAN	Q9Y6F9
	MZB1	Q8WU39				TEX264 ZSIG11 UNQ337/PRO536	TX264_HUMAN	Q9Y6I9
	N4BP2L2	Q92802				TLL2 KIAA0932	TLL2_HUMAN	Q9Y6L7
	NAA38	Q9BRA0				CLCA3P CLCA3	CLCA3_HUMAN	Q9Y6N3
	NAAA	Q02083				LAMC3	LAMC3_HUMAN	Q9Y6N6
	NAGA	P17050				FCGBP	FCGBP_HUMAN	Q9Y6R7
	NAGLU	P54802				ICOS AILIM	ICOS_HUMAN	Q9Y6W8
	NAGS	Q8N159				LY96 ESOP1 MD2	LY96_HUMAN	Q9Y6Y9
	NAPSA	O96009				COLEC10 CLL1 UNQ366/PRO702	COL10_HUMAN	Q9Y6Z7
	NAXE	Q8NCW5				ADAM15 MDC15	ADA15_HUMAN	Q13444
	NBL1	P41271				Total reviewed		1826
	NBPF26	B4DH59
	NCAM1	P13591
	NCAN	O14594
	NCBP2-AS2	Q69YL0
	NCSTN	Q92542
	NDNF	Q8TB73
	NDP	Q00604
	NDUFA10	O95299
	NDUFB5	O43674
	NDUFS8	O00217
	NDUFV1	P49821
	NECAB3	Q96P71
	NECTIN1	Q15223
	NELL1	Q92832
	NELL2	Q99435
	NENF	Q9UMX5
	NETO1	Q8TDF5
	NFASC	O94856
	NFE2L1	Q14494
	NFE2L3	Q9Y4A8
	NGEF	Q8N5V2
	NGF	P01138
	NGLY1	Q96IV0
	NGRN	Q9NPE2
	NHLRC3	Q5JS37
	NID1	P14543
	NID2	Q14112
	NKG7	Q16617
	NLGN3	Q9NZ94
	NLGN4Y	Q8NFZ3
	NLRP5	P59047
	NMB	P08949
	NME1	P15531
	NME1-NME2	Q32Q12
	NME3	Q13232
	NMS	Q5H8A3
	NMU	P48645
	NOA1	Q8NC60
	NODAL	Q96S42
	NOG	Q13253
	NOMO3	P69849
	NOTCH3	Q9UM47
	NOTUM	Q6P988
	NOV	P48745
	NPB	Q8NG41
	NPC2	P61916
	NPFF	O15130
	NPFFR2	Q9Y5X5
	NPHS1	O60500
	NPNT	Q6UXI9
	NPPA	P01160
	NPPB	P16860
	NPPC	P23582
	NPS	P0C0P6
	NPTX1	Q15818
	NPTX2	P47972
	NPTXR	O95502
	NPVF	Q9HCQ7
	NPW	Q8N729
	NPY	P01303
	NQO2	P16083
	NRCAM	Q92823
	NRG1	Q02297
	NRN1L	Q496H8
	NRP1	O14786
	NRP2	O60462
	NRTN	Q99748
	NRXN1	P58400
	NRXN2	P58401
	NT5C3A	Q9H0P0
	NT5DC3	Q86UY8
	NT5E	P21589
	NTF3	P20783
	NTF4	P34130
	NTM	Q9P121
	NTN1	O95631
	NTN3	O00634
	NTN4	Q9HB63
	NTN5	Q8WTR8
	NTNG1	Q9Y2I2
	NTNG2	Q96CW9
	NTS	P30990
	NUBPL	Q8TB37
	NUCB1	Q02818
	NUCB2	P80303
	NUDT19	A8MXV4
	NUDT9	Q9BW91
	NUP155	O75694
	NUP214	P35658
	NUP85	Q9BW27
	NXPE3	Q969Y0
	NXPE4	Q6UWF7
	NXPH1	P58417
	NXPH2	O95156
	NXPH3	O95157
	NXPH4	O95158
	NYX	Q9GZU5
	OAF	Q86UD1
	OBP2A	Q9NY56
	OBP2B	Q9NPH6
	OC90	Q02509
	OCLN	Q16625
	ODAM	A1E959
	OGG1	O15527
	OGN	P20774
	OIT3	Q8WWZ8
	OLFM1	Q99784
	OLFM2	O95897
	OLFM3	Q96PB7
	OLFM4	Q6UX06
	OLFML1	Q6UWY5
	OLFML2A	Q68BL7
	OLFML2B	Q68BL8
	OLFML3	Q9NRN5
	OMD	Q99983
	OMG	P23515
	OOSP2	Q86WS3
	OPCML	Q14982
	OPRPN	Q99935
	OPTC	Q9UBM4
	ORAI1	Q96D31
	ORM1	P02763
	ORM2	P19652
	ORMDL2	Q53FV1
	OS9	Q13438
	OSCAR	Q8IYS5
	OSM	P13725
	OSMR	Q99650
	OSTN	P61366
	OTOA	Q7RTW8
	OTOG	Q6ZRI0
	OTOGL	Q3ZCN5
	OTOL1	A6NHN0
	OTOR	Q9NRC9
	OTOS	Q8NHW6
	OVCH1	Q7RTY7
	OVCH2	Q7RTZ1
	OVGP1	Q12889
	OXCT1	P55809
	OXCT2	Q9BYC2
	OXNAD1	Q96HP4
	OXT	P01178
	P3H1	Q32P28
	P3H2	Q8IVL5
	P3H3	Q8IVL6
	P3H4	Q92791
	P4HA1	P13674
	P4HA2	O15460
	P4HA3	Q7Z4N8
	P4HB	P07237
	PAEP	P09466
	PAM	P19021
	PAMR1	Q6UXH9
	PAPLN	O95428
	PAPPA	Q13219
	PAPPA2	Q9BXP8
	PARP15	Q460N3
	PARVB	Q9HBI1
	PATE1	Q8WXA2
	PATE2	Q6UY27
	PATE3	B3GLJ2
	PATE4	P0C8F1
	PATL2	C9JE40
	PAX2	Q02962
	PAX4	O43316
	PCCB	P05166
	PCDH1	Q08174
	PCDH12	Q9NPG4
[truncated: 897 more rows]

## Sheet: Table 8
	Plasma Proteome Datasets															[Plasma PepAtl] and [PPD] and [HPA]:
	Database resource: http://www.peptideatlas.org, http://www.plasmaproteomedatabase.org, https://www.proteinatlas.org.
	Total unique protein-coding genes: 11282 reviewed proteins
	Peptide Atlas			Plasma Proteome Database									Human Protein Atlas			P04217		Q9NUJ1		Q9NPC4		Q9HAR2	A8K2U0	P04217	Q13685
	Gene name	UniProtKb		Gene name	UniProtKb		Gene name	UniProtKb		Gene name	UniProtKb		Gene name	UniProtKb		P01023		Q8NFV4		Q9UNA3		Q9ZPI6	Q9UDR5	P01023	O95477
	A1BG	P04217		A1BG_HUMAN	P04217		GLCE_HUMAN	O94923		PIT1_HUMAN	P28069		A1BG	P04217		P49588		P16442		P22760		O75829	Q9NP58	P49588	Q86UK0
	A2M	P01023		A2MG_HUMAN	P01023		GCSP_HUMAN	P23378		OBF1_HUMAN	Q16633		A2M	P01023		P80404		Q9BYF1		Q8N5Z0		O95777	Q9BUJ0	P80404	Q9BZC7
	A2ML1	A8K2U0		A2ML1_HUMAN	A8K2U0		GLDN_HUMAN	Q6ZMI3		PO2F1_HUMAN	P14859		AAMP	Q13685		O15439		Q9NPH0		Q7RTV5		Q9NZV5	O95870	O15439	Q99758
	AARS	P49588		A4GAT_HUMAN	Q9NPC4		GLI1_HUMAN	P08151		PO2F3_HUMAN	Q9UKI9		AARS	P49588		Q96IU4		Q4G176		Q16613			Q8IZP0	Q96IU4	P78363
	AASS	Q9UDR5		A4GCT_HUMAN	Q9UNA3		GLI2_HUMAN	P10070		PO3F1_HUMAN	Q03052		ABAT	P80404		Q7Z7G0		P63267		Q9Y312			P11310	Q7Z7G0	P08183
	ABAT	P80404		AAAD_HUMAN	P22760		GLI3_HUMAN	P10071		PO3F2_HUMAN	P20265		ABCA1	O95477		Q9P1F3		Q96HD9		Q5JTZ9			P49748	Q9P1F3	Q9NRK6
	ABCB6	Q9NP58		AADAT_HUMAN	Q8N5Z0		GLI4_HUMAN	P10075		PO4F1_HUMAN	Q01851		ABCA12	Q86UK0		P09110		P82987		Q9BTE6			P16112	P09110	P21439
	ABCC4	O15439		AAED1_HUMAN	Q7RTV5		GAPR1_HUMAN	Q9H4G4		PO4F2_HUMAN	Q12837		ABCA2	Q9BZC7		P42765		Q6UY14		Q86UQ4			P22303	P42765	O75027
	ABHD10	Q9NUJ1		AAMP_HUMAN	Q13685		GLIS1_HUMAN	Q8NBF1		PO4F3_HUMAN	Q15319		ABCA3	Q99758		P16219		Q6ZMM2		Q8IUA7			Q8TDX5	P16219	P33527
	ABHD11	Q8NFV4		SNAT_HUMAN	Q16613		GLIS2_HUMAN	Q9BZE0		PO5F1_HUMAN	Q01860		ABCA4	P78363		P45954		O94910		O95342			O00154	P45954	Q92887
	ABHD14A	Q9BUJ0		AAR2_HUMAN	Q9Y312		GLIS3_HUMAN	Q8NEA6		PO5F2_HUMAN	Q8N7G0		ABCB1	P08183		Q15057		Q8IWW8		Q9NUT2			Q15067	Q15057	O95255
	ABHD14B	Q96IU4		SYAC_HUMAN	P49588		GLMN_HUMAN	Q92990		PO6F1_HUMAN	Q14863		ABCB10	Q9NRK6		P24752		Q9BRR6		Q9NP78			Q99424	P24752	Q09428
	ABHD16A	O95870		SYAM_HUMAN	Q5JTZ9		LGUL_HUMAN	Q04760		IPYR_HUMAN	Q15181		ABCB4	P21439		Q9BWD1		Q8TD06		O15438			P11117	Q9BWD1	O14678
	ABI1	Q8IZP0		AASD1_HUMAN	Q9BTE6		GLOD4_HUMAN	Q9HC38		IPYR2_HUMAN	Q9H2U2		ABCB7	O75027		P12821		Q8IVF2		O15440			Q9NR19	P12821	Q8NE71
	ABI3BP	Q7Z7G0		AASS_HUMAN	Q9UDR5		GLP1R_HUMAN	P43220		SSF1_HUMAN	Q9NQ55		ABCC1	P33527		P53396		O60218		O60706			Q9NZ32	P53396	Q9H3Z7
	ABO	P16442		GABT_HUMAN	P80404		GLP2R_HUMAN	O95838		PLPP3_HUMAN	O14495		ABCC2	Q92887		P21399		Q9H2A2		P33897			P07311	P21399	O94929
	ABRACL	Q9P1F3		ABCA1_HUMAN	O95477		GLRA1_HUMAN	P23415		PPARA_HUMAN	Q07869		ABCC4	O15439		Q99798		Q9Y303		Q9UBJ2			Q13444	Q99798	O00763
	ACAA1	P09110		ABCAC_HUMAN	Q86UK0		GLRA2_HUMAN	P23416		PPARG_HUMAN	P37231		ABCC6	O95255		P24666		Q86SJ2		P28288			P78536	P24666	Q15027
	ACAA2	P42765		ABCAD_HUMAN	Q86UQ4		GLRA3_HUMAN	O75311		PRGC1_HUMAN	Q9UBK2		ABCC8	Q09428		P13686		Q8IY63		P61221			Q9P0K1	P13686	Q9H3P7
	ACADM	P11310		ABCA2_HUMAN	Q9BZC7		GLRB_HUMAN	P48167		PUR1_HUMAN	Q06203		ABCD4	O14678		P15309		P04745		Q9UG63			O75077	P15309	Q9UKV3
	ACADS	P16219		ABCA3_HUMAN	Q99758		GLRX1_HUMAN	P35754		CXCL7_HUMAN	P02775		ABCF1	Q8NE71		O60488		O43827		P45844			Q9UNA0	O60488	P49753
	ACADSB	P45954		ABCA4_HUMAN	P78363		GLRX3_HUMAN	O76003		PPCS_HUMAN	Q9HAB8		ABHD14B	Q96IU4		Q9ULC5		Q4KMQ2		Q9UNQ0			Q8N6G6	Q9ULC5	O14734
	ACADVL	P49748		ABCA9_HUMAN	Q8IUA7		GLRX5_HUMAN	Q86SX6		PPDPF_HUMAN	Q9H3Y8		ABHD16B	Q9H3Z7		P68133		P19801		Q9H172			P35612	P68133	P33121
	ACAN	P16112		MDR1_HUMAN	P08183		GLSK_HUMAN	O94925		PPE1_HUMAN	O14829		ABI3BP	Q7Z7G0		P60709		P63010		Q9H222			Q9UEY8	P60709	P62736
	ACAP2	Q15057		ABCBA_HUMAN	Q9NRK6		GLSL_HUMAN	Q9UI32		PPE2_HUMAN	O14830		ABLIM3	O94929		Q562R1		Q96GX9		Q9H221			Q96PE1	Q562R1	O96019
	ACAT1	P24752		ABCBB_HUMAN	O95342		GL1D1_HUMAN	Q96MS3		LIPA1_HUMAN	Q13136		ABRACL	Q9P1F3		P68032		Q0VD83		Q8N2K0			Q8IWK6	P68032	Q9H013
	ACAT2	Q9BWD1		MDR3_HUMAN	P21439		GLTP_HUMAN	Q9NZD2		LIPA2_HUMAN	O75334		ACAA1	P09110		P63261		Q9UKG1		Q7Z5M8			O60241	P63261	Q9UKQ2
	ACE	P12821		ABCB6_HUMAN	Q9NP58		BICRA_HUMAN	Q9NZM4		LIPA3_HUMAN	O75145		ACAA2	P42765		P12814		Q8NEU8		P08910			Q6QNK2	P12814	Q9UKF2
	ACE2	Q9BYF1		ABCB7_HUMAN	O75027		DHE3_HUMAN	P00367		LIPA4_HUMAN	O75335		ACACB	O00763		P35609		O75915		Q9NYB9			Q14246	P35609	Q9H2U9
	ACHE	P22303		ABCB8_HUMAN	Q9NUT2		DHE4_HUMAN	P49448		LIPB1_HUMAN	Q86W92		ACADS	P16219		Q08043		Q9NVJ2		Q9P2A4			Q9Y653	Q08043	P78325
	ACLY	P53396		ABCB9_HUMAN	Q9NP78		GLNA_HUMAN	P15104		LIPB2_HUMAN	Q8ND30		ACADSB	P45954		O43707		Q9H993		P00519			O95490	O43707	P58397
	ACMSD	Q8TDX5		MRP1_HUMAN	P33527		GLYL1_HUMAN	Q969I3		PPHLN_HUMAN	Q8NEY8		ACAP1	Q15027		P61163		Q9BPX5		P42684			P28332	P61163	Q8WXS8
	ACO1	P21399		MRP2_HUMAN	Q92887		GLCTK_HUMAN	Q8IVS8		PPIA_HUMAN	P62937		ACAP2	Q15057		P42025		Q96EG1		O14639			P55263	P42025	O95450
	ACO2	Q99798		MRP3_HUMAN	O15438		GLYR1_HUMAN	Q49A26		PPIB_HUMAN	P23284		ACAT1	P24752		P61160		Q9NR71		Q6H8Q1			P30566	P61160	Q9UKP4
	ACOT7	O00154		MRP4_HUMAN	O15439		SAP3_HUMAN	P17900		PPIC_HUMAN	P45877		ACAT2	Q9BWD1		P61158		A6ND91		Q12979			Q8IUX7	P61158	Q9P2N4
	ACOX1	Q15067		MRP5_HUMAN	O15440		GMCL1_HUMAN	Q96IK5		PPID_HUMAN	Q08752		ACBD3	Q9H3P7		Q03154		Q9NT62		Q13085			P52594	Q03154	P55265
	ACOX2	Q99424		MRP6_HUMAN	O95255		GMDS_HUMAN	O60547		PPIE_HUMAN	Q9UNP9		ACE	P12821		P00813		Q8WYN0		Q9UKU7			Q9BSE5	P00813	P78563
	ACP1	P24666		ABCC8_HUMAN	Q09428		GMEB1_HUMAN	Q9Y692		PPIF_HUMAN	P30405		ACIN1	Q9UKV3		O14672		O95352		Q9H845			O95994	O14672	O60266
	ACP2	P11117		ABCC9_HUMAN	O60706		GMEB2_HUMAN	Q9UKD1		PPIG_HUMAN	Q13427		ACLY	P53396		Q13443		Q6DD88		P28330			Q9BYV1	Q13443	Q8NFM4
	ACP5	P13686		ABCD1_HUMAN	P33897		GMFB_HUMAN	P60983		PPIH_HUMAN	O43447		ACO1	P21399		O15204		P05026		Q96P50			P27144	O15204	P35368
	ACP6	Q9NPH0		ABCD2_HUMAN	Q9UBJ2		GMFG_HUMAN	O60234		PPIL1_HUMAN	Q9Y3C6		ACO2	Q99798		Q9UHI8		P54709		P35610			O95154	Q9UHI8	P25100
	ACPP	P15309		ABCD3_HUMAN	P28288		GMIP_HUMAN	Q9P107		PPIL2_HUMAN	Q13356		ACOT2	P49753		Q76LX8		O75947		O75908			P30837	Q76LX8	P25098
	ACSF3	Q4G176		ABCD4_HUMAN	O14678		GML_HUMAN	Q99445		VIP1_HUMAN	Q6PFW1		ACOT8	O14734		Q9UP79		P56134		Q8N6N7			P51649	Q9UP79	P51816
	ACSL4	O60488		ABCE1_HUMAN	P61221		GEMI_HUMAN	O75496		PEPL_HUMAN	O60437		ACP1	P24666		Q86TH1		Q9UI12		Q8WXI4			Q02252	Q86TH1	Q9Y4W6
	ACSL5	Q9ULC5		ABCF1_HUMAN	Q8NE71		GMPR1_HUMAN	P36959		PPM1A_HUMAN	P35813		ACP5	P13686		P35611		Q9UII2		Q8WYK0			P18054	P35611	Q9UPQ3
	ACSS2	Q9NR19		ABCF2_HUMAN	Q9UG63		GMPR2_HUMAN	Q9P2T1		PPM1B_HUMAN	O75688		ACPP	P15309		O60242		Q8NFL0		Q8N9L9			Q86V81	O60242	O00253
	ACTA1	P68133		ABCG1_HUMAN	P45844		GUAA_HUMAN	P49915		PPM1D_HUMAN	O15297		ACSL1	P33121		Q8IZF2		Q7Z7M8		Q9Y305			Q96NU7	Q8IZF2	O00170
	ACTB	P60709		ABCG2_HUMAN	Q9UNQ0		GNA11_HUMAN	P29992		PPM1F_HUMAN	P49593		ACSL4	O60488		Q8IZP9		O60909		O15254			P03971	Q8IZP9	O43572
	ACTBL2	Q562R1		ABCG4_HUMAN	Q9H172		GNA12_HUMAN	Q03113		PPM1G_HUMAN	O15355		ACSL5	Q9ULC5		Q86SQ4		O60512		P10323			Q01433	Q86SQ4	Q9UKA4
	ACTC1	P68032		ABCG5_HUMAN	Q9H222		GNA13_HUMAN	Q14344		PPM1M_HUMAN	Q96MI6		ACTA1	P68133		Q9HBW9		Q14032		Q96GR2			P04746	Q9HBW9	Q12802
	ACTG1	P63261		ABCG8_HUMAN	Q9H221		GNA15_HUMAN	P30679		PPM1N_HUMAN	Q8N819		ACTA2	P62736		P07327		O95393		O95573			O95841	P07327	P24588
	ACTG2	P63267		ABD12_HUMAN	Q8N2K0		GNAI1_HUMAN	P63096		PPME1_HUMAN	Q9Y570		ACTB	P60709		P00325		P12644		Q9UKU0			Q9UKU9	P00325	O43687
	ACTN1	P12814		AB12B_HUMAN	Q7Z5M8		GNAI2_HUMAN	P04899		OREX_HUMAN	O43612		ACTBL2	Q562R1		P00326		Q9BWV1		Q9NUB1			O15084	P00326	O43823
	ACTN2	P35609		ABHEA_HUMAN	Q9BUJ0		GNAI3_HUMAN	P08754		PPOX_HUMAN	P50336		ACTC1	P68032		P08319		Q9H3K6		O94805			Q9BTT0	P08319	Q99996
	ACTN3	Q08043		ABHEB_HUMAN	Q96IU4		GNAO_HUMAN	P09471		PP1A_HUMAN	P62136		ACTG1	P63261		P11766		O95861		Q9Y615			P09525	P11766	Q9Y243
	ACTN4	O43707		ABHGA_HUMAN	O95870		GNAQ_HUMAN	P50148		PP1B_HUMAN	P62140		ACTL6A	O96019		Q15848		Q5VW32		Q9Y614			P20073	Q15848	Q9H8T0
	ACTR10	Q9NZ32		ABHGB_HUMAN	Q9H3Z7		GNAT1_HUMAN	P11488		PP1G_HUMAN	P36873		ACTN1	P12814		Q15847		Q7Z6A9		Q9GZN1			O43747	Q15847	P13196
	ACTR1A	P61163		ABHD2_HUMAN	P08910		GNAT2_HUMAN	P19087		PP1RB_HUMAN	O60927		ACTN2	P35609		P35318		Q9H7M9		Q9H981			O95782	P35318	Q9UM73
	ACTR1B	P42025		ABI1_HUMAN	Q8IZP0		GNAZ_HUMAN	P19086		MYPT1_HUMAN	O14974		ACTN3	Q08043		P30520		Q9H741		Q8TDY3			Q9BZZ5	P30520	Q13686
	ACTR2	P61160		ABI2_HUMAN	Q9NYB9		GBB1_HUMAN	P62873		MYPT2_HUMAN	O60237		ACTN4	O43707		Q8N142		Q86TY3		Q9BYD9			P29972	Q8N142	P05187
	ACTR3	P61158		ABI3_HUMAN	Q9P2A4		GNB1L_HUMAN	Q9BYB4		ASPP1_HUMAN	Q96KQ4		ACTR1A	P61163		P43652		Q9NWV4		P27037			Q96P48	P43652	P10696
	ACY1	Q03154		TARSH_HUMAN	Q7Z7G0		GBB2_HUMAN	P62879		IASPP_HUMAN	Q8WUF5		ACTR1B	P42025		P02771		Q9H425		Q13705			P62330	P02771	Q96Q35
	ACY3	Q96HD9		ABL1_HUMAN	P00519		RACK1_HUMAN	P63244		PP14A_HUMAN	Q96A00		ACTR2	P61160		P20933		Q9GZN8		P37023			A1A4S6	P20933	Q01432
	ACYP1	P07311		ABL2_HUMAN	P42684		GBB3_HUMAN	P16520		PP14B_HUMAN	Q96C90		ACTR3	P61158		Q15109		Q9BSF0		P14621			Q8N392	Q15109	P48728
	ADA	P00813		ABLM1_HUMAN	O14639		GNB5_HUMAN	O14775		PP14C_HUMAN	Q8TAE6		ACY1	Q03154		P35573		Q5BLP8		O75078			Q14155	P35573	Q9UJX3
	ADAM10	O14672		ABLM2_HUMAN	Q6H8Q1		GLCNE_HUMAN	Q9Y223		PP16A_HUMAN	Q96I34		ADA	P00813		Q9UKV8		Q9BUH6		O43184			P36405	Q9UKV8	Q5VTE6
	ADAM15	Q13444		ABLM3_HUMAN	O94929		GBG12_HUMAN	Q9UBI6		PP16B_HUMAN	Q96T49		ADAM10	O14672		O00116		Q8IZS8		Q9Y3Q7			Q15041	O00116	Q15389
	ADAM17	P78536		ABR_HUMAN	Q12979		GBG2_HUMAN	P59768		PPR1A_HUMAN	Q13522		ADAM19	Q9H013		O00468		P62158		Q99965			P49407	O00468	Q01484
	ADAM22	Q9P0K1		ABRAL_HUMAN	Q9P1F3		GBG4_HUMAN	P50150		PPR26_HUMAN	Q5T8A7		ADAM28	Q9UKQ2		P01019		Q8WVQ1		O43506			P15289	P01019	Q12955
	ADAM23	O75077		THIK_HUMAN	P09110		GBG7_HUMAN	O60262		PPR3A_HUMAN	Q16821		ADAM30	Q9UKF2		P21549		Q8N4T8		Q9UKF5			Q13508	P21549	O75179
	ADAM9	Q13443		THIM_HUMAN	P42765		GNL1_HUMAN	P36915		PPR3D_HUMAN	O95685		ADAM7	Q9H2U9		P23526		P0DN79		Q8TC27			Q93070	P23526	Q5XXA6
	ADAMDEC1	O15204		ACACA_HUMAN	Q13085		NOG2_HUMAN	Q13823		PP1R7_HUMAN	Q15435		ADAM8	P78325		Q09666		P83916		Q9BZ11			Q13510	Q09666	P27216
	ADAMTS1	Q9UHI8		ACACB_HUMAN	O00763		GNL3_HUMAN	Q9BVP2		PP1R8_HUMAN	Q12972		ADAM9	Q13443		O95433		Q5T0F9		Q9H324			Q9ULH1	O95433	P61966
	ADAMTS13	Q76LX8		ACAD8_HUMAN	Q9UKU7		GNL3L_HUMAN	Q9NVN8		NEB1_HUMAN	Q9ULJ8		ADAMDEC1	O15204		P02765		Q93033		Q8TE58			O43150	P02765	Q9UPM8
	ADAMTS5	Q9UNA0		ACAD9_HUMAN	Q9H845		GNMT_HUMAN	Q14749		PP2AA_HUMAN	P67775		ADAMTS1	Q9UHI8		Q9NZD4		P48509		Q8TE57			O43681	Q9NZD4	O14727
	ADAMTS8	Q9UP79		ACADL_HUMAN	P28330		GNPI1_HUMAN	P46926		PP2AB_HUMAN	P62714		ADAMTS12	P58397		O95831		O95971		Q8TE56			Q8WXF7	O95831	O00213
	ADAMTSL1	Q8N6G6		ACADM_HUMAN	P11310		GNA1_HUMAN	Q96EK6		2AAA_HUMAN	P30153		ADAMTS13	Q76LX8		Q13155		Q9NR16		Q8TE60			O00244	Q13155	P25054
	ADAMTSL2	Q86TH1		ACADS_HUMAN	P16219		GNPTA_HUMAN	Q3T906		2AAB_HUMAN	P30154		ADAMTS14	Q8WXS8		P00568		P29017		Q8TE59			P14415	P00568	Q9BPW4
	ADAMTSL3	P82987		ACDSB_HUMAN	P45954		GNPTG_HUMAN	Q9UJJ9		2ABB_HUMAN	Q00005		ADAMTS2	O95450		P54819		P15813		P59510			P23634	P54819	Q9BWW9
	ADAMTSL4	Q6UY14		ACADV_HUMAN	P49748		GOGA1_HUMAN	Q92805		2ABG_HUMAN	Q9Y2T4		ADAMTS7	Q9UKP4		Q9UIJ7		Q6UXG3		O15072			P98194	Q9UIJ7	Q92482
	ADAMTSL5	Q6ZMM2		PGCA_HUMAN	P16112		GOGA2_HUMAN	Q08379		P2R3A_HUMAN	Q06190		ADAMTS8	Q9UP79		Q02952		Q9NPF0		O75173			P30049	Q02952	O60306
	ADD1	P35611		ACAP1_HUMAN	Q15027		GOGA3_HUMAN	Q08378		PTPA_HUMAN	Q15257		ADAMTS9	Q9P2N4		P14550		P19256		Q9UKP5			P24539	P14550	P10275
	ADD2	P35612		ACAP2_HUMAN	Q15057		GOGA4_HUMAN	Q13439		2A5A_HUMAN	Q15172		ADAMTSL2	Q86TH1		P15121		P42081		Q9NPF8			P56385	P15121	P10398
	ADD3	Q9UEY8		ACAP3_HUMAN	Q96P50		GOGA5_HUMAN	Q8TBA6		2A5B_HUMAN	Q15173		ADAR	P55265		P42330		P01732		Q9NS39			O75964	P42330	P61204
	ADGRA2	Q96PE1		THIL_HUMAN	P24752		GOG6A_HUMAN	Q9NYA3		2A5G_HUMAN	Q13362		ADARB1	P78563		P17516		P40200		Q9BUB4			Q93050	P17516	Q8N6T3
	ADGRA3	Q8IWK6		SOAT1_HUMAN	P35610		GOGB1_HUMAN	Q14789		2A5D_HUMAN	Q14738		ADCY3	O60266		O43488		Q9Y5S2		Q96A70			P21281	O43488	P42331
	ADGRB2	O60241		SOAT2_HUMAN	O75908		GOLI4_HUMAN	O00461		PP2BA_HUMAN	Q08209		ADCY4	Q8NFM4		P13716		Q4KMG0		Q8NI60			P21283	P13716	Q13017
	ADGRB3	O60242		THIC_HUMAN	Q9BWD1		GOLM1_HUMAN	Q8NBJ4		PP2BB_HUMAN	P16298		ADD1	P35611		P02768		Q6UWW8		Q08828			Q5VV63	P02768	Q92974
	ADGRD1	Q6QNK2		GCP60_HUMAN	Q9H3P7		GOLP3_HUMAN	Q9H4A6		PP2BC_HUMAN	P48454		ADGRB1	O14514		Q13740		Q9BWS9		Q08462			O94766	Q13740	Q9NR80
	ADGRE1	Q14246		ACBD7_HUMAN	Q8N6N7		GOT1B_HUMAN	Q9Y3E0		CANB1_HUMAN	P63098		ADGRB3	O60242		Q8IZ83		O43633		O95622			Q00973	Q8IZ83	P15848
	ADGRF5	Q8IZF2		ACE_HUMAN	P12821		GON4L_HUMAN	Q3T8J9		CANB2_HUMAN	Q96LZ3		ADGRF3	Q8IZF5		P54886		Q9H444		O43306			P56817	P54886	Q6UWY0
	ADGRG1	Q9Y653		ACES_HUMAN	P22303		GORS1_HUMAN	Q9BQQ3		PP4R1_HUMAN	Q8TF05		ADGRF5	Q8IZF2		P00352		Q96FZ7		P51828			P46379	P00352	Q96QS3
	ADGRG2	Q8IZP9		ACINU_HUMAN	Q9UKV3		GORS2_HUMAN	Q9H8Y8		PPP5_HUMAN	P53041		ADGRG2	Q8IZP9		O75891		O43529		P40145			Q07812	O75891	Q8WXJ9
	ADGRG6	Q86SQ4		ACLY_HUMAN	P53396		GOSR1_HUMAN	O95249		PPP6_HUMAN	O00743		ADGRG3	Q86Y34		P05091		Q9NPF2		O60503			O75936	P05091	Q8N9N2
	ADGRL1	O94910		ACMSD_HUMAN	Q8TDX5		AATC_HUMAN	P17174		PP6R1_HUMAN	Q9UPN7		ADGRG4	Q8IZF6		P30038		Q7LFX5		P41586			P51572	P30038	Q16515
	ADGRL2	O95490		ACOC_HUMAN	P21399		AATM_HUMAN	P00505		PP6R2_HUMAN	O75170		ADGRG6	Q86SQ4		P49419		Q7LGC8		P40394			P54687	P49419	Q8IZT6
	ADGRL4	Q9HBW9		ACON_HUMAN	Q99798		GP1BA_HUMAN	P07359		PPT1_HUMAN	P50897		ADGRL3	Q9HAR2		P49189		O75339		Q9BV57			O15382	P49189	O14525
	ADH1A	P07327		ACO11_HUMAN	Q8WXI4		GP2_HUMAN	P55259		PPT2_HUMAN	Q9UMR5		ADGRL4	Q9HBW9		P04075		Q8IUL8		Q96A54			P02818	P04075	Q9ULI0
	ADH1B	P00325		ACO12_HUMAN	Q8WYK0		GPV_HUMAN	P40197		PPWD1_HUMAN	Q96BP3		ADH1A	P07327		P05062		Q8N5K1		Q86V24			P21810	P05062	Q13315
	ADH1C	P00326		ACOT2_HUMAN	P49753		GPVI_HUMAN	Q9HCN6		PQLC1_HUMAN	Q8N2U9		ADH1B	P00325		P09972		Q07065		Q7Z4H4			Q9H2M3	P09972	P54259
	ADH4	P08319		ACOT4_HUMAN	Q8N9L9		GPIX_HUMAN	P14770		PADC1_HUMAN	Q9BSG0		ADH1C	P00326		P05186		Q05315		Q9H2P0			P55957	P05186	Q92858
	ADH5	P11766		BACH_HUMAN	O00154		GPA33_HUMAN	Q99795		PRAF2_HUMAN	O60831		ADH4	P08319		Q9UHK6		Q14CN2		P0DMS8			O00499	Q9UHK6	P98196
	ADH6	P28332		ACOT8_HUMAN	O14734		GPAA1_HUMAN	O43292		PRAME_HUMAN	P78395		ADH5	P11766		P02760		O00501		P54922			Q9UBW5	P02760	Q8NB49
	ADHFE1	Q8IWW8		ACOT9_HUMAN	Q9Y305		GPAT1_HUMAN	Q9HCL2		PRAM1_HUMAN	O95521		ADIPOQ	Q15848		P19961		Q9P126		Q8NDY3			P22004	P19961	P54707
	ADIPOQ	Q15848		ACOX1_HUMAN	Q15067		GPAN1_HUMAN	O95872		PRA12_HUMAN	O95522		ADIRF	Q15847		P03950		Q9H2X3		P35348			Q86WA6	P03950	Q9HD20
	ADIRF	Q15847		ACOX2_HUMAN	Q99424		GPTC2_HUMAN	Q9NW75		PRAM2_HUMAN	O60811		ADM	P35318		O15123		Q8N0X4		P08913			Q8WUW1	O15123	Q9NQ11
	ADK	P55263		ACOX3_HUMAN	O15254		GPTC8_HUMAN	Q9UKJ3		PRAM4_HUMAN	O60810		ADRA1B	P35368		Q9Y5C1		Q96DG6		P18089			P35613	Q9Y5C1	P50993
	ADM	P35318		PPAC_HUMAN	P24666		GPC1_HUMAN	P35052		PRB3_HUMAN	Q04118		ADRA1D	P25100		Q9BY76		Q8IY22		P18825			O43684	Q9BY76	O14983
	ADPGK	Q9BRR6		PPAL_HUMAN	P11117		GPC4_HUMAN	O75487		PRB4_HUMAN	P10163		ADSS	P30520		Q8NI99		Q96F85		P08588			Q7L1Q6	Q8NI99	P20020
	ADSL	P30566		PPA5_HUMAN	P13686		GPC5_HUMAN	P78333		PRC1_HUMAN	O43663		ADSSL1	Q8N142		Q6UXH0		Q6PJW8		P13945			Q9H0W9	Q6UXH0	Q01814
	ADSS	P30520		PPAP_HUMAN	P15309		GPC6_HUMAN	Q9Y625		PRCC_HUMAN	Q92733		AFDN	P55196		P16157		A8TX70		P35626			Q9Y224	P16157	Q16720
	ADSSL1	Q8N142		ACRO_HUMAN	P10323		GPCP1_HUMAN	Q9NPB8		PCP_HUMAN	P42785		AFF2	P51816		Q9P2R3		A6NMZ7		Q16186			Q6UX73	Q9P2R3	Q9Y487
	AEBP1	Q8IUX7		ACBG1_HUMAN	Q96GR2		GPDA_HUMAN	P21695		PRDM1_HUMAN	O75626		AFG3L2	Q9Y4W6		P39687		O14579		P51825			Q9NS00	P39687	P27449
	AFM	P43652		ACSL1_HUMAN	P33121		GPDM_HUMAN	P43304		PRD10_HUMAN	Q9NQV6		AFM	P43652		Q92688		Q9BT78		P51826			Q9BXJ1	Q92688	Q04656
	AFP	P02771		ACSL3_HUMAN	O95573		GEPH_HUMAN	Q9NQX3		PRD11_HUMAN	Q9NQV5		AFP	P02771		P15144		Q7L5N1		Q9UHB7			Q9BXJ0	P15144	Q8TF62
	AGA	P20933		ACSL4_HUMAN	O60488		G6PI_HUMAN	P06744		PRD12_HUMAN	Q9H4Q4		AGA	P20933		Q9H6X2		Q9H9Q2		Q6ULP2			P30042	Q9H6X2	Q8WWM7
	AGER	Q15109		ACSL5_HUMAN	Q9ULC5		GPKOW_HUMAN	Q92917		PRD13_HUMAN	Q9H4Q3		AGAP1	Q9UPQ3		P58335		P61923		Q99490			Q8IXQ3	P58335	P54252
	AGFG1	P52594		ACSL6_HUMAN	Q9UKU0		PHLD_HUMAN	P80108		PRD15_HUMAN	P57071		AGER	Q15109		P04083		Q14061		Q96P47			O43570	P04083	O15265
	AGL	P35573		ACS2L_HUMAN	Q9NUB1		GPN1_HUMAN	Q9HCN4		PRD16_HUMAN	Q9HAZ2		AGL	P35573		P50995		P14406		Q96MI9			Q8N1Q1	P50995	Q9ULK2
	AGMAT	Q9BSE5		ACSA_HUMAN	Q9NR19		GPNMB_HUMAN	Q14956		PRDM2_HUMAN	Q13029		AGO2	Q9UKV8		P07355		P48052		Q8NEM8			P22748	P07355	Q13825
	AGO2	Q9UKV8		ACTS_HUMAN	P68133		GPR1_HUMAN	P46091		PRDM4_HUMAN	Q9UKN5		AGPS	O00116		P12429		Q8IZJ3		O95081			P23280	P12429	O14965
	AGPS	O00116		ACTA_HUMAN	P62736		GP101_HUMAN	Q96P66		PRDM5_HUMAN	Q9NQX1		AGRN	O00468		P08758		Q5IJ48		Q8N302			Q5VU97	P08758	Q96GD4
	AGR2	O95994		ACTB_HUMAN	P60709		GP108_HUMAN	Q9NPR9		PRDM6_HUMAN	Q9NQX0		AGRP	O00253		P08133		Q6UXH1		Q9UL18			Q9NY47	P08133	Q8WXX7
	AGR3	Q8TD06		ACTBL_HUMAN	Q562R1		AGRG4_HUMAN	Q8IZF6		PRDM8_HUMAN	Q9NQV8		AGT	P01019		Q16853		Q9NZV1		Q9H9G7			Q8N3J6	Q16853	O75366
	AGRN	O00468		ACTC_HUMAN	P68032		AGRF3_HUMAN	Q8IZF5		PRDM9_HUMAN	Q9NQV7		AGXT	P21549		Q06278		Q9UBG3		Q9HCK5			Q8N126	Q06278	P37288
	AGT	P01019		ACTG_HUMAN	P63261		AGRG5_HUMAN	Q8IZF4		PRDX1_HUMAN	Q06830		AHCY	P23526		Q10567		O95727		Q99943			Q8NFZ8	Q10567	O15169
	AGXT	P21549		ACL6A_HUMAN	O96019		AGRF5_HUMAN	Q8IZF2		PRDX2_HUMAN	P32119		AHNAK	Q09666		Q9BXS5		Q6UVK1		O15120			Q9P1Z2	Q9BXS5	Q9Y2T1
	AGXT2	Q9BYV1		ACL6B_HUMAN	O94805		GPR12_HUMAN	P47775		PRDX3_HUMAN	P30048		AHSA1	O95433		O94973		P09228		Q9NRZ7			P49913	O94973	Q9UPN4
	AHCY	P23526		ACL7A_HUMAN	Q9Y615		AGRA1_HUMAN	Q86SQ6		PRDX4_HUMAN	Q13162		AHSG	P02765		Q96CW1		Q96CG8		Q9NUQ2			Q9Y2V2	Q96CW1	O14867
	AHNAK	Q09666		ACL7B_HUMAN	Q9Y614		AGRA2_HUMAN	Q96PE1		PRDX5_HUMAN	P30044		AHSP	Q9NZD4		O00203		Q9NRF8		Q9UPW5			P49589	O00203	Q9BYV9
	AHNAK2	Q8IVF2		ACTN1_HUMAN	P12814		AGRA3_HUMAN	Q8IWK6		PRDX6_HUMAN	P30041		AIFM1	O95831		O14617		P43234		O43865			Q6P4E1	O14617	O95816
	AHSA1	O95433		ACTN2_HUMAN	P35609		AGRG6_HUMAN	Q86SQ4		PREB_HUMAN	Q9HCU5		AIM1	Q9ZPI6		P02743		O60494		Q96HN2			P23435	P02743	O14514
	AHSG	P02765		ACTN3_HUMAN	Q08043		AGRG7_HUMAN	Q96K78		PRLD1_HUMAN	Q9Y255		AIMP2	Q13155		P13798		Q9H7Y0		Q5TGY3			Q8IUK8	P13798	Q9UQB8
	AHSP	Q9NZD4		ACTN4_HUMAN	O43707		GP132_HUMAN	Q9UNW8		PRELP_HUMAN	P51888		AIP	O00170		P27695		Q9UHQ9		P35869			Q8N163	P27695	Q13145
	AIFM1	O95831		ARP10_HUMAN	Q9NZ32		AGRD1_HUMAN	Q6QNK2		PPCE_HUMAN	P48147		AK1	P00568		P51693		P04839		Q9GZX7			Q96EE4	P51693	Q99728
	AIMP2	Q13155		ACTZ_HUMAN	P61163		G137B_HUMAN	O60478		PREX1_HUMAN	Q8TCU6		AK2	P54819		Q06481		P61803		Q96BJ3			Q76M96	Q06481	Q9UIG0
	AK1	P00568		ACTY_HUMAN	P42025		GP143_HUMAN	P51810		PREX2_HUMAN	Q70Z35		AK3	Q9UIJ7		Q9HDC9		Q8N8Z6		Q9NVV5			Q8N6Q3	Q9HDC9	Q9UIF9
	AK2	P54819		ARP2_HUMAN	P61160		AGRD2_HUMAN	Q7Z7M1		PERF_HUMAN	P14222		AKAP10	O43572		P02647		Q96PD2		Q9UMX9			Q8TD46	P02647	Q96PG8
	AK3	Q9UIJ7		ARP3_HUMAN	P61158		GP150_HUMAN	Q8NGU9		PRG2_HUMAN	P13727		AKAP11	Q9UKA4		P02652		Q96C86		Q9Y4K1			Q9NNX6	P02652	Q8IWZ6
	AK4	P27144		ARP6_HUMAN	Q9GZN1		GP151_HUMAN	Q8TDV0		PRG4_HUMAN	Q92954		AKAP12	Q02952		P06727		P32321		Q8N1P7			Q15762	P06727	P56945
	AKAP12	Q02952		ARP8_HUMAN	Q9H981		GP152_HUMAN	Q8TDT2		PRIC1_HUMAN	Q96MT3		AKAP13	Q12802		Q6Q788		Q9BTE1		O14862			Q9HCU0	Q6Q788	Q9H6U6
	AKR1A1	P14550		ACTT2_HUMAN	Q8TDY3		GP160_HUMAN	Q9UJ42		PRIC2_HUMAN	Q7Z3G6		AKAP5	P24588		P04114		Q9H773		Q12904			Q5ZPR3	P04114	P12694
	AKR1B1	P15121		ACTT3_HUMAN	Q9BYD9		GP161_HUMAN	Q8N6U8		PRIC3_HUMAN	O43900		AKAP7	O43687		P02654		Q96GG9		Q9NWT8			Q9Y5K6	P02654	Q9H165
	AKR1B10	O60218		AVR2A_HUMAN	P27037		GP174_HUMAN	Q9BXC1		PRI1_HUMAN	P49642		AKAP8	O43823		P02655		P98153		O43918			P28906	P02655	Q9C0K0
	AKR1C3	P42330		AVR2B_HUMAN	Q13705		GP179_HUMAN	Q6PRD1		PRI2_HUMAN	P49643		AKAP9	Q99996		P02656		Q6UWP2		Q9Y6K8			P25942	P02656	P10415
	AKR1C4	P17516		ACVL1_HUMAN	P37023		GPR18_HUMAN	Q14330		AAPK1_HUMAN	Q13131		AKR1A1	P14550		P55056		P80370		Q96M32			Q08722	P55056	P20749
	AKR7A2	O43488		ACY1_HUMAN	Q03154		GP183_HUMAN	P32249		AAPK2_HUMAN	P54646		AKR1B1	P15121		P05090		Q13217		Q92667			P30203	P05090	P23560
	AKR7A3	O95154		ACYP1_HUMAN	P07311		GPR19_HUMAN	Q15760		AAKB1_HUMAN	Q9Y478		AKR1C3	P42330		P02649		P49184		Q02040			P04233	P02649	Q9NQY0
	ALAD	P13716		ACYP2_HUMAN	P14621		GPR20_HUMAN	Q99678		AAKB2_HUMAN	O43741		AKR1C4	P17516		Q13790		O00115		Q9Y2D5			Q9UIB8	Q13790	Q13489
	ALB	P02768		ADA_HUMAN	P00813		GPR22_HUMAN	Q99680		KAPCA_HUMAN	P17612		AKR7A2	O43488		P02749		Q8NFT8		O75969			P48960	P02749	Q9NR09
	ALCAM	Q13740		ADA10_HUMAN	O14672		GPR25_HUMAN	O00155		KAPCG_HUMAN	P22612		AKT3	Q9Y243		O14791		Q9H4B8		Q5JQC9			Q8TCZ2	O14791	Q96P09
	ALDH16A1	Q8IZ83		ADA11_HUMAN	O75078		GPR26_HUMAN	Q8NDV2		AAKG1_HUMAN	P54619		AKTIP	Q9H8T0		Q9BQE5		Q9P2X0		Q13023			Q16543	Q9BQE5	P54132
	ALDH18A1	P54886		ADA12_HUMAN	O43184		GPR27_HUMAN	Q9NS67		AAKG2_HUMAN	Q9UGJ0		ALAD	P13716		O95445		Q9C005		Q9P0M2			P55287	O95445	Q9NUP1
	ALDH1A1	P00352		ADA15_HUMAN	Q13444		GPR3_HUMAN	P46089		AAKG3_HUMAN	Q9UGI9		ALAS1	P13196		P05067		Q86SJ6		Q9ULX6			P55291	P05067	Q8TDH9
	ALDH1B1	P30837		ADA17_HUMAN	P78536		GPR34_HUMAN	Q9UPC5		KAP0_HUMAN	P10644		ALB	P02768		P07741		Q96DC8		Q7Z591			Q9H159	P07741	P12645
	ALDH1L1	O75891		ADA18_HUMAN	Q9Y3Q7		GPR35_HUMAN	Q9HC97		KAP2_HUMAN	P13861		ALCAM	Q13740		P48444		Q9Y262		Q04828			Q9H251	P48444	Q8N8U9
	ALDH2	P05091		ADA19_HUMAN	Q9H013		GPR37_HUMAN	O15354		KPCA_HUMAN	P17252		ALDH16A1	Q8IZ83		P18085		P0C7U0		P51857			Q15517	P18085	Q01954
	ALDH4A1	P30038		ADAM2_HUMAN	Q99965		ETBR2_HUMAN	O60883		KPCB_HUMAN	P05771		ALDH18A1	P54886		P84085		Q8N766		P31751			P40199	P84085	Q9UMX3
	ALDH5A1	P51649		ADA20_HUMAN	O43506		GPR39_HUMAN	O43194		KPCD_HUMAN	Q05655		ALDH1A1	P00352		P05089		P50402		P22557			P19835	P05089	P59826
	ALDH6A1	Q02252		ADA22_HUMAN	Q9P0K1		GPR4_HUMAN	P46093		KPCE_HUMAN	Q02156		ALDH1L1	O75891		Q07960		Q9UHY7		Q8TES7			Q96G23	Q07960	Q12830
	ALDH7A1	P49419		ADA23_HUMAN	O75077		MTR1L_HUMAN	Q13585		KPCG_HUMAN	P05129		ALDH2	P05091		O43182		O14638		O94788			O00748	O43182	P38398
	ALDH8A1	Q9H2A2		ADA28_HUMAN	Q9UKQ2		AGRG1_HUMAN	Q9Y653		KPCL_HUMAN	P24723		ALDH4A1	P30038		P52565		Q6UWR7		P47895			Q9NX63	P52565	Q8TDN6
	ALDH9A1	P49189		ADA29_HUMAN	Q9UKF5		GPR61_HUMAN	Q9BZJ8		KPCI_HUMAN	P41743		ALDH7A1	P49419		P52566		Q6UWV6		P30838			Q9BY43	P52566	P55201
	ALDOA	P04075		ADA30_HUMAN	Q9UKF2		GPR62_HUMAN	Q9BZJ7		KPCT_HUMAN	Q04759		ALDH9A1	P49189		Q92888		Q9NQZ7		P51648			Q9UHD1	Q92888	Q9ULD4
	ALDOB	P05062		ADA32_HUMAN	Q8TC27		GPR63_HUMAN	Q9BZJ6		GLU2B_HUMAN	P14314		ALDOA	P04075		Q92747		P07099		Q2TAA5			Q9BU40	Q92747	P32247
	ALDOC	P09972		ADA33_HUMAN	Q9BZ11		AGRG2_HUMAN	Q8IZP9		KPCZ_HUMAN	Q05513		ALDOB	P05062		O15143		Q9H9K5		Q9BV10			Q6WN34	O15143	Q8TDC3
	ALOX12	P18054		ADAM7_HUMAN	Q9H2U9		OGR1_HUMAN	Q15743		KPCD1_HUMAN	Q15139		ALDOC	P09972		O15144		Q9BSJ8		Q9H553			Q9NRB3	O15144	Q9NSI6
	ALPL	P05186		ADAM8_HUMAN	P78325		GPR78_HUMAN	Q96P69		KPCD2_HUMAN	Q9BZL6		ALK	Q9UM73		O15145		O95571		Q92685			Q6FI81	O15145	Q9UPA5
	ALYREF	Q86V81		ADAM9_HUMAN	Q13443		GPR83_HUMAN	Q9NYM4		KPCD3_HUMAN	O94806		ALKBH1	Q13686		P59998		Q96A26		Q9Y673			P12532	P59998	Q10589
	AMACR	Q9UHK6		ADEC1_HUMAN	O15204		GPR85_HUMAN	P60893		PRKDC_HUMAN	P78527		ALPL	P05186		O15511		Q5VUB5		Q9BVK2			A8K7I4	O15511	O14981
	AMBP	P02760		ATS1_HUMAN	Q9UHI8		GPR87_HUMAN	Q9BY21		KGP1_HUMAN	Q13976		ALPP	P05187		P07307		Q9UFP1		Q8N6M5			Q9UQC9	P07307	O95153
	AMDHD1	Q96NU7		ATS10_HUMAN	Q9H324		AGRG3_HUMAN	Q86Y34		KGP2_HUMAN	Q13237		ALPPL2	P10696		P04424		Q9H0X4		O75342			O15551	P04424	Q7Z589
	AMDHD2	Q9Y303		ATS12_HUMAN	P58397		GPR98_HUMAN	Q8WXG9		P52K_HUMAN	O43422		ALS2CR12	Q96Q35		Q12797		Q5JW98		P16050			Q86T13	Q12797	Q8N1H7
	AMH	P03971		ATS13_HUMAN	Q76LX8		GASP1_HUMAN	Q5JY77		PRKX_HUMAN	P51817		AMACR	Q9UHK6		Q9BXN1		P58499		O15296			O15247	Q9BXN1	Q9HAS0
	AMIGO2	Q86SJ2		ATS14_HUMAN	Q8WXS8		RAI3_HUMAN	Q8NFJ5		PRL_HUMAN	P01236		AMBP	P02760		Q53RT3		P25445		P09917			Q9Y696	Q53RT3	O75973
	AMOTL1	Q8IY63		ATS15_HUMAN	Q8TE58		GPC5B_HUMAN	Q9NZH0		PBX1_HUMAN	P40424		AMPD3	Q01432		P00966		Q6V0I7		Q9BYJ1			Q9NZA1	P00966	Q9BXJ2
	AMPD2	Q01433		ATS16_HUMAN	Q8TE57		GRIN2_HUMAN	O60269		PRRP_HUMAN	P81277		AMT	P48728		P18850		P30273		P09923			Q9H6B4	P18850	Q8N6M6
	AMY1A	P04745		ATS17_HUMAN	Q8TE56		CSN1_HUMAN	Q13098		PRLR_HUMAN	P16471		AMY2B	P19961		Q99941		P06734		Q96Q42			O75503	Q99941	Q9H9S4
	AMY2A	P04746		ATS18_HUMAN	Q8TE60		GPSM2_HUMAN	P81274		ANM1_HUMAN	Q99873		ANAPC7	Q9UJX3		P31939		Q96LA6		Q60I27			Q9H4D0	P31939	Q9Y6J0
	AMY2B	P19961		ATS19_HUMAN	Q8TE59		ALAT1_HUMAN	P24298		ANM2_HUMAN	P55345		ANG	P03950		P05023		Q96RD9		O95076			Q9NX76	P05023	Q8TDN4
	ANG	P03950		ATS2_HUMAN	O95450		GPX1_HUMAN	P07203		ANM3_HUMAN	O60678		ANGEL2	Q5VTE6		P16615		Q9NVK5		Q9H161			Q9BT09	P16615	O00555
	ANGPT2	O15123		ATS20_HUMAN	P59510		GPX2_HUMAN	P18283		ANM5_HUMAN	O14744		ANGPT1	Q15389		Q93084		Q96C11		Q9NP70			Q9UQ52	Q93084	Q00975
	ANGPTL1	O95841		ATS3_HUMAN	O15072		GPX3_HUMAN	P22352		ANM6_HUMAN	Q96LA8		ANGPT2	O15123		P20648		P49789		P17707			Q9C0A0	P20648	Q01668
	ANGPTL2	Q9UKU9		ATS4_HUMAN	O75173		GPX4_HUMAN	P36969		ANM7_HUMAN	Q9NVM4		ANGPTL3	Q9Y5C1		P25705		Q5T1M5		Q8N944			Q13057	P25705	O60840
	ANGPTL3	Q9Y5C1		ATS5_HUMAN	Q9UNA0		GPX5_HUMAN	O75715		ANM8_HUMAN	Q9NR22		ANGPTL4	Q9BY76		P06576		Q4ZHG4		Q9UKV5			Q03692	P06576	O43497
	ANGPTL4	Q9BY76		ATS6_HUMAN	Q9UKP5		GPX6_HUMAN	P59796		APRIO_HUMAN	F7VJQ1		ANGPTL6	Q8NI99		P36542		Q5SZK8		Q16671			Q07092	P36542	Q9P0X4
	ANGPTL6	Q8NI99		ATS7_HUMAN	Q9UKP4		GPX7_HUMAN	Q96SL4		PRIO_HUMAN	P04156		ANGPTL8	Q6UXH0		P18859		A2VDF0		Q9Y4X0			Q96P44	P18859	O00305
	ANGPTL7	O43827		ATS8_HUMAN	Q9UP79		GRM1A_HUMAN	Q96CP6		PROC_HUMAN	P04070		ANK1	P16157		P48047		Q495W5		Q9BXJ7			Q17RW2	P48047	P06881
	ANGPTL8	Q6UXH0		ATS9_HUMAN	Q9P2N4		GRAP_HUMAN	Q13588		PRCA1_HUMAN	Q8NCQ7		ANK2	Q01484		Q15904		Q96C23		Q9Y2J4			P02462	Q15904	P10092
	ANK1	P16157		ATL1_HUMAN	Q8N6G6		GRAP2_HUMAN	O75791		EPCR_HUMAN	Q9UNN8		ANK3	Q12955		P61421		Q8N4A0		P23109			P25940	P61421	Q16602
	ANKFY1	Q9P2R3		ATL2_HUMAN	Q86TH1		GRASP_HUMAN	Q7Z6J2		PROD_HUMAN	O43272		ANKFY1	Q9P2R3		P38606		P07902		P49418			Q5KU26	P38606	P0DP23
	ANKRD28	O15084		ADAP2_HUMAN	Q9NPF8		GRB10_HUMAN	Q13322		PKR2_HUMAN	Q8NFJ6		ANKRD17	O75179		P36543		P30047		Q9H1A4			P61201	P36543	P0DP24
	ANO6	Q4KMQ2		DSRAD_HUMAN	P55265		GRB14_HUMAN	Q14449		PROL1_HUMAN	Q99935		ANO1	Q5XXA6		O75348		P48507		Q9UM13			Q9UNS2	O75348	P0DP25
	ANP32A	P39687		RED1_HUMAN	P78563		GRB2_HUMAN	P62993		PROM1_HUMAN	O43490		ANP32A	P39687		Q9Y2Q0		Q9BVM4		Q96DE5			Q92905	Q9Y2Q0	Q96L12
	ANP32B	Q92688		RED2_HUMAN	Q9NS39		GRB7_HUMAN	Q14451		PROP1_HUMAN	O75360		ANP32B	Q92688		O75882		Q6P531		Q9UJX5			Q9UBW8	O75882	Q8IU85
	ANP32E	Q9BTT0		ADAT1_HUMAN	Q9BUB4		GREB1_HUMAN	Q4ZG55		PROS_HUMAN	P07225		ANPEP	P15144		P30530		Q9NU53		Q9UJX4			Q99627	P30530	Q96NX5
	ANPEP	P15144		AZIN2_HUMAN	Q96A70		GRHL1_HUMAN	Q9NZI5		PROX1_HUMAN	Q92786		ANTXR1	Q9H6X2		P25311		Q8TF64		Q9UNK9			P57737	P25311	Q9P1Y5
	ANTXR1	Q9H6X2		COQ8A_HUMAN	Q8NI60		GRHPR_HUMAN	Q9UBQ7		PROZ_HUMAN	P22891		ANTXR2	P58335		P20160		Q92896		Q9Y264			P13073	P20160	Q9ULU8
	ANTXR2	P58335		ADCY1_HUMAN	Q08828		GRIA1_HUMAN	P42261		PRP18_HUMAN	Q99633		ANXA1	P04083		P61769		Q96IJ6		Q9NU02			P10606	P61769	Q9BWT7
	ANXA1	P04083		ADCY2_HUMAN	Q08462		GRIA2_HUMAN	P42262		PRP19_HUMAN	Q9UMS4		ANXA11	P50995		O75752		Q9Y5P6		Q9HCJ1			P09669	O75752	Q9BX69
	ANXA11	P50995		ADCY3_HUMAN	O60266		GRIA3_HUMAN	P42263		PRPF3_HUMAN	O43395		ANXA13	P27216		Q9NY97		Q9HAV0		Q9P2G1			P15085	Q9NY97	Q8NG31
	ANXA2	P07355		ADCY4_HUMAN	Q8NFM4		GRIA4_HUMAN	P48058		PRP4_HUMAN	O43172		ANXA2	P07355		P15291		P61952		Q8NAG6			O75976	P15291	Q8WXD9
	ANXA3	P12429		ADCY5_HUMAN	O95622		GRID1_HUMAN	Q9ULK0		PR40A_HUMAN	O75400		ANXA3	P12429		O43505		P63218		Q9P2S6			P36551	O43505	P42575
	ANXA4	P09525		ADCY6_HUMAN	O43306		GRID2_HUMAN	O43424		PRP4B_HUMAN	Q13523		ANXA5	P08758		O95817		Q8TDQ7		Q9H9E1			Q9BRF8	O95817	P51878
	ANXA5	P08758		ADCY7_HUMAN	P51828		GRIK1_HUMAN	P39086		PRP6_HUMAN	O94906		ANXA6	P08133		O75531		P15586		Q15327			Q9H3G5	O75531	P41180
	ANXA6	P08133		ADCY8_HUMAN	P40145		GRIK3_HUMAN	Q13003		PRP8_HUMAN	Q6P2Q9		AOC3	Q16853		P80723		P13224		Q9NXR5			P43155	P80723	Q96P56
	ANXA7	P20073		ADCY9_HUMAN	O60503		GRIK4_HUMAN	Q16099		PERI_HUMAN	P41219		AOX1	Q06278		P50895		Q9Y4H4		Q6UB99			O75629	P50895	P35520
	AOC1	P19801		PACR_HUMAN	P41586		GRIK5_HUMAN	Q16478		PRPH2_HUMAN	P23942		AP1B1	Q10567		Q96GW7		Q9HAV7		Q6UB98			Q96HD1	Q96GW7	Q6UXH8
	AOC3	Q16853		ADDA_HUMAN	P35611		NMDZ1_HUMAN	Q05586		PRPS1_HUMAN	P60891		AP1M1	Q9BXS5		P06276		Q96QA5		Q8IZ07			P52943	P06276	Q8N5R6
	AOX1	Q06278		ADDB_HUMAN	P35612		NMDE1_HUMAN	Q12879		PRPS2_HUMAN	P11908		AP1S1	P61966		Q9BXK5		P28161		Q8IVF6			P46108	Q9BXK5	Q9P219
	AP1B1	Q10567		ADDG_HUMAN	Q9UEY8		NMDE2_HUMAN	Q13224		KPRA_HUMAN	Q14558		AP2A2	O94973		Q9NYF8		P30711		Q9GZV1			P02511	Q9NYF8	Q9Y3X0
	AP1G1	O43747		ADH1A_HUMAN	P07327		NMDE3_HUMAN	Q14957		PROL4_HUMAN	Q16378		AP2M1	Q96CW1		Q93088		Q4G148		Q5TYW2			Q14894	Q93088	Q2M329
	AP1M1	Q9BXS5		ADH1B_HUMAN	P00325		NMDE4_HUMAN	O15399		NECT4_HUMAN	Q96NY8		AP3B1	O00203		Q13867		Q9P035		Q9UPS8			P15509	Q13867	P06307
	AP2A1	O95782		ADH1G_HUMAN	P00326		NMD3A_HUMAN	Q8TCU5		PRC2A_HUMAN	P48634		AP3D1	O14617		P53004		P81172		Q8N283			P01036	P53004	P13500
	AP2A2	O94973		ADH4_HUMAN	P08319		NMD3B_HUMAN	O60391		PRC2B_HUMAN	Q5JSZ5		AP4E1	Q9UPM8		P30043		Q6B0K9		Q9ULJ7			P32929	P30043	Q9NUG4
	AP2B1	P63010		ADHX_HUMAN	P11766		LEG12_HUMAN	Q96DT0		PRC2C_HUMAN	Q9Y520		APAF1	O14727		P13497		P09105		Q9Y2G4			P10619	P13497	P14635
	AP2M1	Q96CW1		ADH6_HUMAN	P28332		GRIP1_HUMAN	Q9Y3R0		TMG1_HUMAN	O14668		APBB1	O00213		P07738		Q7Z4H3		Q96BM1			O60911	P07738	O95067
	AP3B1	O00203		ADH7_HUMAN	P40394		GRIP2_HUMAN	Q9C0E4		PRRT1_HUMAN	Q99946		APC	P25054		Q9NP55		Q8N4P3		Q92625			Q13618	Q9NP55	P51959
	AP3D1	O14617		MTND_HUMAN	Q9BV57		RK_HUMAN	Q15835		PRRT3_HUMAN	Q5FWE3		APCS	P02743		Q8TDL5		Q9H0R4		Q8N8V4			O60888	Q8TDL5	P22674
	APCS	P02743		ADIPO_HUMAN	Q15848		GRK4_HUMAN	P32298		PRRX2_HUMAN	Q99811		APEH	P13798		Q8N4F0		Q9BSH5		Q9NQW6			P78310	Q8N4F0	O60563
	APEH	P13798		ADR1_HUMAN	Q96A54		GRK5_HUMAN	P34947		TRY1_HUMAN	P07477		APEX1	P27695		Q10588		Q9NRV9		Q9NQ90			Q9H2A7	Q10588	O60583
	APEX1	P27695		ADR2_HUMAN	Q86V24		GRK6_HUMAN	P43250		NETR_HUMAN	P56730		APLP1	P51693		P43251		Q9Y5Z4		Q9BYT9			P00387	P43251	O43303
	API5	Q9BZZ5		ADIRF_HUMAN	Q15847		GRK7_HUMAN	Q8WTQ7		TSSP_HUMAN	Q9NQE7		APLP2	Q06481		P20290		Q5T447		O43423			Q7L576	P20290	P46092
	APIP	Q96GX9		ADK_HUMAN	P55263		GRM1_HUMAN	Q13255		TRY2_HUMAN	P07478		APMAP	Q9HDC9		Q06187		Q9BXL5		O95626			Q9UN19	Q06187	Q9BZW8
	APLP1	P51693		ADML_HUMAN	P35318		GRM2_HUMAN	Q14416		TEST_HUMAN	Q9Y6M0		APOA1	P02647		P02745		A8MVW5		Q9UJ72			Q13561	P02745	P09693
	APLP2	Q06481		ADM2_HUMAN	Q7Z4H4		GRM3_HUMAN	Q14832		BSSP4_HUMAN	Q9GZN4		APOA2	P02652		P02746		Q6MZM0		P13928			O75935	P02746	P08962
	APMAP	Q9HDC9		ADNP_HUMAN	Q9H2P0		GRM4_HUMAN	Q14833		PRS23_HUMAN	O95084		APOA4	P06727		Q07021		Q6NVY1		Q5VT79			P20711	Q07021	P34810
	APOA1	P02647		AA3R_HUMAN	P0DMS8		GRM5_HUMAN	P41594		PRS27_HUMAN	Q9BQR3		APOA5	Q6Q788		P02747		P68431		O76027			Q08345	P02747	P27701
	APOA2	P02652		ADPRH_HUMAN	P54922		GRM6_HUMAN	O15303		TRY3_HUMAN	P35030		APOB	P04114		Q9BXJ4		P01920		P28039			Q16832	Q9BXJ4	Q8IWY9
	APOA4	P06727		ARHL1_HUMAN	Q8NDY3		GRM7_HUMAN	Q14831		TSP50_HUMAN	Q9UI38		APOC1	P02654		P00736		P13762		O75106			Q96HY6	P00736	Q9UNH5
	APOA5	Q6Q788		ADA1A_HUMAN	P35348		GRM8_HUMAN	O00222		PRS55_HUMAN	Q6UWB4		APOC2	P02655		Q9NZP8		Q8NDA2		O75843			Q9Y315	Q9NZP8	Q12834
	APOB	P04114		ADA1B_HUMAN	P35368		GRN_HUMAN	P28799		PRSS8_HUMAN	Q16651		APOC3	P02656		P09871		P17096		Q9Y6Q5			Q9UBM7	P09871	P30304
	APOBR	Q0VD83		ADA1D_HUMAN	P25100		GRP_HUMAN	P07492		PRTN3_HUMAN	P24158		APOC4	P55056		P06681		P50135		P56377			Q9Y394	P06681	P30305
	APOC1	P02654		ADA2A_HUMAN	P08913		LEGL_HUMAN	Q3ZCW2		PRAX_HUMAN	Q9BXM0		APOD	P05090		P01024		Q1KMD3		P53680			O00548	P01024	P30260
	APOC2	P02655		ADA2B_HUMAN	P18089		GRSF1_HUMAN	Q12849		PRY_HUMAN	O14603		APOE	P02649		P0C0L4		Q86XE5		Q13367			P36957	P0C0L4	Q00587
	APOC3	P02656		ADA2C_HUMAN	P18825		GRWD1_HUMAN	Q9BQ67		SAP_HUMAN	P07602		APOF	Q13790		P0C0L5		O60760		P53677			Q9UGM3	P0C0L5	O75419
	APOC4	P55056		ADRB1_HUMAN	P08588		GSC2_HUMAN	O15499		SFPA2_HUMAN	Q8IWL1		APOH	P02749		P04003		Q53T59		Q92572			P31689	P04003	Q99459
	APOD	P05090		ADRB3_HUMAN	P13945		GSDMD_HUMAN	P57764		SFTA1_HUMAN	Q8IWL2		APOL1	O14791		P20851		O60243		P59780			O60884	P20851	Q99741
	APOE	P02649		ARBK1_HUMAN	P25098		GSE1_HUMAN	Q14687		MTCH1_HUMAN	Q9NZJ7		APOL2	Q9BQE5		P01031		Q8IZP7		Q9Y6B7			P25685	P01031	O00311
	APOF	Q13790		ARBK2_HUMAN	P35626		HASP_HUMAN	Q8TF76		SAPL1_HUMAN	Q6NUJ1		APOL4	Q9BPW4		P13671		Q8NBQ5		O00189			Q9UBS4	P13671	P55289
	APOH	P02749		ADRM1_HUMAN	Q16186		GSK3A_HUMAN	P49840		SERC_HUMAN	Q9Y617		APOL5	Q9BWW9		P10643		Q53GQ0		Q9H0R1			Q8WXX5	P10643	Q8IXH8
	APOL1	O14791		PUR8_HUMAN	P30566		GSK3B_HUMAN	P49841		PSD3_HUMAN	Q9NYI0		APOM	O95445		P07357		Q9Y547		Q9NUS5			P24855	P07357	P06493
	APOL2	Q9BQE5		PURA2_HUMAN	P30520		GELS_HUMAN	P06396		PSD4_HUMAN	Q8NDX1		APP	P05067		P07358		Q9UBY9		O43299			O43598	P07358	P24941
	APOM	O95445		PURA1_HUMAN	Q8N142		ERF3A_HUMAN	P15170		PSN1_HUMAN	P49768		APRT	P07741		P07360		Q2TAA2		Q02410			O60496	P07360	P11802
	APP	P05067		AEBP1_HUMAN	Q8IUX7		GSHR_HUMAN	P00390		PSN2_HUMAN	P49810		AQP3	Q92482		P02748		Q9NSE4		Q99767			Q7L591	P02748	Q00535
	APPL1	Q9UKG1		AFF1_HUMAN	P51825		GSHB_HUMAN	P48637		PSG1_HUMAN	P11464		AQR	O60306		P00915		P13284		O96018			P16444	P00915	Q96SN8
	APPL2	Q8NEU8		AFF2_HUMAN	P51816		GSTA1_HUMAN	P08263		PSG11_HUMAN	Q9UQ72		AR	P10275		P00918		P01876		Q7Z5R6			Q07507	P00918	Q96JB5
	APRT	P07741		AFF3_HUMAN	P51826		GSTA3_HUMAN	Q16772		PSG2_HUMAN	P11465		ARAF	P10398		P07451		P01880		Q92870			Q12882	P07451	Q00534
	AQP1	P29972		AFF4_HUMAN	Q9UHB7		GSTA5_HUMAN	Q7RTV2		PSG3_HUMAN	Q16557		ARCN1	P48444		Q9Y376		P01854		O95704			Q14117	Q9Y376	P50613
	ARAP1	Q96P48		AFG32_HUMAN	Q9Y4W6		GSTK1_HUMAN	Q9Y2Q3		PSG6_HUMAN	Q00889		ARF3	P61204		P54289		P01859		O95996			Q14195	P54289	P49336
	ARCN1	P48444		AFAM_HUMAN	P43652		GSTM1_HUMAN	P09488		PSG7_HUMAN	Q13046		ARF4	P18085		Q9HB71		A0A0C4DH31		Q9BV35			Q8TEA8	Q9HB71	P50750
	ARF4	P18085		FETA_HUMAN	P02771		GSTM3_HUMAN	P21266		PSG8_HUMAN	Q9UQ74		ARF5	P84085		P27708		P23083		Q9UJX6			Q13409	P27708	O76039
	ARF5	P84085		AFTIN_HUMAN	Q6ULP2		GSTM4_HUMAN	Q03013		PSG9_HUMAN	Q00887		ARFGAP1	Q8N6T3		Q9BY67		A0A0C4DH33		Q96BI3			Q14213	Q9BY67	P42771
	ARF6	P62330		ASPG_HUMAN	P20933		GSTO1_HUMAN	P78417		PSG4_HUMAN	Q00888		ARG1	P05089		P22676		A0A0C4DH29		P35414			Q13011	P22676	P42773
	ARG1	P05089		AGAP1_HUMAN	Q9UPQ3		GSTO2_HUMAN	Q9H4Y5		PSIP1_HUMAN	O75475		ARHGAP1	Q07960		Q05682		P01743		Q8IUX4			Q86YB7	Q05682	Q92879
	ARHGAP1	Q07960		AGAP2_HUMAN	Q99490		GSTP1_HUMAN	P09211		KPSH1_HUMAN	P11801		ARHGAP25	P42331		P27482		P01742		Q9HC16			O60869	P27482	Q9NYQ7
	ARHGAP10	A1A4S6		AGAP3_HUMAN	Q96P47		MAAI_HUMAN	O43708		PSA1_HUMAN	P25786		ARHGAP45	Q92619		Q9NZT1		A0A0B4J1V2		O95236			O43324	Q9NZT1	Q02224
	ARHGAP18	Q8N392		CBPC4_HUMAN	Q96MI9		GSX1_HUMAN	Q9H4S2		PSA2_HUMAN	P25787		ARHGAP5	Q13017		P27797		P01817		Q9BWW8			O75071	P27797	P49454
	ARHGAP6	O43182		CBPC3_HUMAN	Q8NEM8		GSX2_HUMAN	Q9BZM3		PSA3_HUMAN	P25788		ARHGAP6	O43182		O43852		P01814		Q92624			Q96C19	O43852	O60308
	ARHGDIA	P52565		RAGE_HUMAN	Q15109		TF2AA_HUMAN	P52655		PSA4_HUMAN	P25789		ARHGDIA	P52565		Q14012		P01762		Q7Z2E3			P20827	Q14012	Q66GS9
	ARHGDIB	P52566		AGFG1_HUMAN	P52594		TF2AY_HUMAN	Q9UNN4		PSA5_HUMAN	P28066		ARHGDIB	P52566		Q9UQM7		P01766		Q8IXF9			Q14156	Q9UQM7	O94986
	ARHGEF1	Q92888		AGFG2_HUMAN	O95081		T2AG_HUMAN	P52657		PSA6_HUMAN	P60900		ARHGEF1	Q92888		Q13554		A0A0B4J1V0		P55087			Q8N3D4	Q13554	Q9BV73
	ARHGEF7	Q14155		AGGF1_HUMAN	Q8N302		TF2B_HUMAN	Q00403		PSA7_HUMAN	O14818		ARHGEF2	Q92974		Q13557		A0A0B4J1V1		P55064			Q9NZN4	Q13557	Q5VT06
	ARL3	P36405		GDE_HUMAN	P35573		T2EA_HUMAN	P29083		PSA7L_HUMAN	Q8TAA3		ARHGEF4	Q9NR80		Q13555		P01764		Q13520			Q14232	Q13555	Q86XR8
	ARL6IP1	Q15041		SPEB_HUMAN	Q9BSE5		T2EB_HUMAN	P29084		PSB1_HUMAN	P20618		ARPC1A	Q92747		Q86VP6		P01772		O94778			P60228	Q86VP6	Q8NHQ1
	ARL6IP5	O75915		AGO1_HUMAN	Q9UL18		T2FA_HUMAN	P35269		PSB10_HUMAN	P40306		ARPC1B	O15143		P27824		A0A0B4J1X8		O14520			O00303	P27824	P02795
	ARL8B	Q9NVJ2		AGO2_HUMAN	Q9UKV8		T2FB_HUMAN	P13984		PSB2_HUMAN	P49721		ARPC2	O15144		Q01518		P01763		O43315			O15372	Q01518	P13569
	ARMT1	Q9H993		AGO3_HUMAN	Q9H9G7		TF2H1_HUMAN	P32780		PSB3_HUMAN	P49720		ARPC3	O15145		P40121		A0A0A0MS15		P15514			Q13347	P40121	P01215
	ARPC1A	Q92747		AGO4_HUMAN	Q9HCK5		TF2H3_HUMAN	Q13889		PSB4_HUMAN	P28070		ARPC4	P59998		P07384		P01767		Q9NP61			Q7L2H7	P07384	Q13112
	ARPC1B	O15143		PLCA_HUMAN	Q99943		TF2H4_HUMAN	Q92759		PSB5_HUMAN	P28074		ARPC5	O15511		P17655		A0A075B6Q5		Q9Y6D6			P23588	P17655	O14647
	ARPC2	O15144		PLCB_HUMAN	O15120		GTF2I_HUMAN	P78347		PSB6_HUMAN	P28072		ARSB	P15848		P04632		P01780		Q9Y6D5			P55010	P04632	Q12873
	ARPC3	O15145		PLCC_HUMAN	Q9NRZ7		GT2D1_HUMAN	Q9UHL9		PSB7_HUMAN	Q99436		ARSK	Q6UWY0		P52907		A0A0B4J1Y9		P53367			Q92556	P52907	Q14839
	ARPC4	P59998		PLCE_HUMAN	Q9NUQ2		GTD2B_HUMAN	Q6EKJ0		PSB8_HUMAN	P28062		ARX	Q96QS3		P47755		A0A0B4J1V6		P53365			Q9Y6C2	P47755	Q8TD26
	ARPC5	O15511		ADAS_HUMAN	O00116		TF3A_HUMAN	Q92664		PSB9_HUMAN	P28065		ASB17	Q8WXJ9		P47756		A0A0B4J1X5		Q13795			Q9NT22	P47756	Q9P2D1
	ARPC5L	Q9BPX5		AGR2_HUMAN	O95994		TF3C1_HUMAN	Q12789		PRS4_HUMAN	P62191		ASCC1	Q8N9N2		P31944		P01782		P78540			O95834	P31944	Q9HCK8
	ARRB1	P49407		AGRIN_HUMAN	O00468		TF3C2_HUMAN	Q8WUA4		PRS7_HUMAN	P35998		ASGR2	P07307		P42574		A0A0C4DH34		Q8IWW6			Q9HC35	P42574	Q3L8U1
	ARSA	P15289		AGRP_HUMAN	O00253		TF3C3_HUMAN	Q9Y5Q9		PRS6A_HUMAN	P17980		ASIC2	Q16515		Q9NQ75		P06331		Q68EM7			Q8N8S7	Q9NQ75	O14757
	ARSG	Q96EG1		ANGT_HUMAN	P01019		TF3C4_HUMAN	Q9UKN8		PRS6B_HUMAN	P43686		ASL	P04424		P20810		P01824		Q5T5U3			P22413	P20810	O96017
	ART3	Q13508		CBPC1_HUMAN	Q9UPW5		TF3C5_HUMAN	Q9Y5Q8		PRS8_HUMAN	P62195		ASPH	Q12797		P04040		P01825		Q8N264			Q9UJA9	P04040	Q96EP1
	ART4	Q93070		SPYA_HUMAN	P21549		GTPB1_HUMAN	O00178		PRS10_HUMAN	P62333		ASPM	Q8IZT6		Q9NTU7		A0A0C4DH38		Q9UNA1			P49961	Q9NTU7	Q9Y259
	ASAH1	Q13510		AGT2_HUMAN	Q9BYV1		GTPB2_HUMAN	Q9BX10		PSMD1_HUMAN	Q99460		ASPN	Q9BXN1		P16152		A0A0B4J1U7		Q52LW3			Q9Y227	P16152	Q9NZZ3
	ASAH2	Q9NR71		SAHH_HUMAN	P23526		NOG1_HUMAN	Q9BZE4		PSD10_HUMAN	O75832		ASPRV1	Q53RT3		Q13185		P01834		O14559			O75354	Q13185	P15882
	ASAP1	Q9ULH1		SAHH2_HUMAN	O43865		GTSE1_HUMAN	Q9NYZ3		PSD11_HUMAN	O00231		ASS1	P00966		Q16627		P04430		Q9NRY4			P54753	Q16627	P52757
	ASAP2	O43150		SAHH3_HUMAN	Q96HN2		GUC1A_HUMAN	P43080		PSD12_HUMAN	O00232		ASTN1	O14525		Q16663		A0A075B6S5		Q9C0H5			O15197	Q16663	Q99653
	ASGR2	P07307		AHDC1_HUMAN	Q5TGY3		GUC2A_HUMAN	Q02747		PSD13_HUMAN	Q9UNM6		ATAD2B	Q9ULI0		O15467		P01597		P98171			P58107	O15467	Q9Y3Y2
	ASL	P04424		AHNK_HUMAN	Q09666		GUC2B_HUMAN	Q16661		PSDE_HUMAN	O00487		ATF6	P18850		P55774		P01602		Q17R89			Q6P179	P55774	P33076
	ASNA1	O43681		AHR_HUMAN	P35869		GCYA2_HUMAN	P33402		PSMD2_HUMAN	Q13200		ATF6B	Q99941		O00585		A0A0C4DH72		Q9BRR9			Q96RT1	O00585	Q99967
	ASPDH	A6ND91		AHSA1_HUMAN	O95433		GCYA3_HUMAN	Q02108		PSMD3_HUMAN	O43242		ATIC	P31939		P55773		P01593		Q99819			P84090	P55773	Q9ULV3
	ASPH	Q12797		FETUA_HUMAN	P02765		GCYB2_HUMAN	O75343		PSMD4_HUMAN	P55036		ATM	Q13315		P13501		A0A087WSZ0		O15013			Q9NQ30	P13501	P51788
	ASPN	Q9BXN1		AHSP_HUMAN	Q9NZD4		GCYB1_HUMAN	Q02153		PSMD5_HUMAN	Q16401		ATN1	P54259		O14618		A0A0C4DH68		O15085			Q96KP1	O14618	P51795
	ASPRV1	Q53RT3		AICDA_HUMAN	Q9GZX7		GUC2C_HUMAN	P25092		PSMD6_HUMAN	Q15008		ATOH1	Q92858		P78371		P06310		Q9NZN5			Q16394	P78371	P51797
	ASS1	P00966		AIDA_HUMAN	Q96BJ3		GUC2D_HUMAN	Q02846		PSMD7_HUMAN	P51665		ATP11A	P98196		P49368		P01615		O94989			Q92935	P49368	O95833
	ATF6	P18850		AIFM1_HUMAN	O95831		GUC2F_HUMAN	P51841		PSMD8_HUMAN	P48556		ATP11C	Q8NB49		P50991		P01614		Q9NR81			P23610	P50991	Q96JQ2
	ATF6B	Q99941		AIG1_HUMAN	Q9NVV5		KGUA_HUMAN	Q16774		PSMD9_HUMAN	O00233		ATP12A	P54707		P48643		P04433		Q12774			P51161	P48643	Q9H078
	ATG3	Q9NT62		S45A2_HUMAN	Q9UMX9		GULP1_HUMAN	Q9UBP9		PSME1_HUMAN	Q06323		ATP13A1	Q9HD20		P40227		P01624		Q15052			Q9BZQ8	P40227	P23946
	ATG4A	Q8WYN0		CRBG1_HUMAN	Q9Y4K1		BGLR_HUMAN	P08236		PSME2_HUMAN	Q9UL46		ATP13A2	Q9NQ11		Q99832		P01619		O14497			Q8N128	Q99832	Q8NFW8
	ATG7	O95352		CRBG2_HUMAN	Q8N1P7		GLYG_HUMAN	P46976		PSME3_HUMAN	P61289		ATP1A1	P05023		P50990		P06312		Q8NFD5			Q96MK3	P50990	Q14028
	ATIC	P31939		AIM2_HUMAN	O14862		GLYG2_HUMAN	O15488		PSMF1_HUMAN	Q92530		ATP1A2	P50993		Q6YHK3		P06315		Q68CP9			O75063	Q6YHK3	Q9UFF9
	ATL1	Q8WXF7		AIMP1_HUMAN	Q12904		LARG2_HUMAN	Q8N3Y3		PSMG4_HUMAN	Q5JS54		ATP2A1	O14983		P08571		P0CF74		Q99856			Q96BQ1	P08571	P26441
	ATL3	Q6DD88		AIMP2_HUMAN	Q13155		GLPB_HUMAN	P06028		PSPC1_HUMAN	Q8WXF1		ATP2A2	P16615		Q86VB7		A0A0B4J1U3		P29374			Q9NUQ9	Q86VB7	Q9UHC6
	ATOX1	O00244		AIP_HUMAN	O00170		GLPE_HUMAN	P15421		SERB_HUMAN	P78330		ATP2A3	Q93084		P20273		P01703		Q4LE39			Q9Y4F1	P20273	Q7Z7A1
	ATP1A1	P05023		AKIP_HUMAN	Q9NWT8		GYS1_HUMAN	P13807		PSPN_HUMAN	O60542		ATP2B1	P20020		P26842		P01699		Q14865			Q9Y285	P26842	Q14746
	ATP1B1	P05026		AIRE_HUMAN	O43918		GZF1_HUMAN	Q9H116		PPIP2_HUMAN	Q9H939		ATP2B2	Q01814		Q9UGN4		P01700		Q9Y4X5			Q14517	Q9UGN4	Q9UP83
	ATP1B2	P14415		KAD1_HUMAN	P00568		GRAA_HUMAN	P12544		PTAFR_HUMAN	P25105		ATP2B3	Q16720		P20138		P01701		O95376			Q53RD9	P20138	Q96MW5
	ATP1B3	P54709		KAD2_HUMAN	P54819		GRAB_HUMAN	P10144		PTBP1_HUMAN	P26599		ATP4A	P20648		P16671		A0A075B6I4		P40616			Q9Y3I1	P16671	Q9UMD9
	ATP2A2	P16615		KAD3_HUMAN	Q9UIJ7		GRAH_HUMAN	P20718		PTBP2_HUMAN	Q9UKA9		ATP5A1	P25705		P16070		P01706		Q0P5N6			Q8WWV6	P16070	Q14993
	ATP2A3	Q93084		KAD4_HUMAN	P27144		GRAK_HUMAN	P49863		PTBP3_HUMAN	O95758		ATP5B	P06576		P15529		P01704		P36404			Q9Y6R7	P15529	Q01955
	ATP2B4	P23634		KAD5_HUMAN	Q9Y6K8		GRAM_HUMAN	P51124		PTCD3_HUMAN	Q96EY7		ATP5C1	P36542		P09326		P01705		P40617			P55899	P09326	P53420
	ATP2C1	P98194		KAD7_HUMAN	Q96M32		H10_HUMAN	P07305		PTC1_HUMAN	Q13635		ATP5J	P18859		P08174		P01715		P56559			O60667	P08174	P27658
	ATP4A	P20648		AKAP1_HUMAN	Q92667		H1X_HUMAN	Q92522		PTC2_HUMAN	Q9Y6C5		ATP5O	P48047		P13987		A0A075B6K4		P49703			Q96AC1	P13987	Q14055
	ATP5A1	P25705		AKA10_HUMAN	O43572		H2AJ_HUMAN	Q9BTM1		PTSS1_HUMAN	P48651		ATP6AP1	Q15904		O43866		A0A075B6K2		Q9Y689			P22607	O43866	Q9Y5Q5
	ATP5B	P06576		AKA11_HUMAN	Q9UKA4		H2AX_HUMAN	P16104		PTSS2_HUMAN	Q9BVG9		ATP6V0A2	Q9Y487		P60033		P01714		Q96KC2			Q96AY3	P60033	Q9UQ03
	ATP5C1	P36542		AKA12_HUMAN	Q02952		H2AY_HUMAN	O75367		PTER_HUMAN	Q96BW5		ATP6V0C	P27449		P21926		P80748		Q9H0F7			P26885	P21926	P15088
	ATP5D	P30049		AKP13_HUMAN	Q12802		H2AW_HUMAN	Q9P0M6		PD2R_HUMAN	Q13258		ATP6V0D1	P61421		Q9NPY3		P01717		Q96BM9			O43155	Q9NPY3	Q9HCH3
	ATP5F1	P24539		AK17A_HUMAN	Q02040		H2AZ_HUMAN	P0C0S5		PD2R2_HUMAN	Q9Y5Y4		ATP6V1A	P38606		P14209		A0A075B6I1		Q8NEN0			Q9NZU0	P14209	O95741
	ATP5H	O75947		AKAP2_HUMAN	Q9Y2D5		G6PE_HUMAN	O95479		PTGDS_HUMAN	P41222		ATP6V1E1	P36543		P32320		A0A075B6H9		Q9UH62			P36888	P32320	Q10570
	ATP5I	P56385		AKAP3_HUMAN	O75969		3HAO_HUMAN	P46952		PE2R1_HUMAN	P34995		ATP6V1G1	O75348		P60953		A0A075B6J1		P27540			Q06828	P60953	Q9P2I0
	ATP5J	P18859		AKAP4_HUMAN	Q5JQC9		HABP2_HUMAN	Q14520		PE2R2_HUMAN	P43116		ATP7A	Q04656		P12830		A0A087WSX0		Q9HBZ2			P49354	P12830	Q5TA45
	ATP5J2	P56134		AKAP5_HUMAN	P24588		HACE1_HUMAN	Q8IYU2		PE2R3_HUMAN	P43115		ATP8A1	Q9Y2Q0		P55290		A0A0A0MRZ9		O00327			P15328	P55290	O95639
	ATP5L	O75964		AKAP6_HUMAN	Q13023		HACL1_HUMAN	Q9UJ83		PE2R4_HUMAN	P35408		ATP8B4	Q8TF62		Q12864		P01721		P56211			P14207	Q12864	P29762
	ATP5O	P48047		AKA7A_HUMAN	O43687		HCDH_HUMAN	Q16836		PTGES_HUMAN	O14684		ATRN	O75882		P19022		A0A075B6I0		Q9UBL0			P41439	P19022	P82279
	ATP6AP1	Q15904		AKA7G_HUMAN	Q9P0M2		ECHA_HUMAN	P40939		TEBP_HUMAN	Q15185		ATXN2L	Q8WWM7		P33151		A0A0B4J1Y8		P36575			Q92765	P33151	Q92793
	ATP6V0A1	Q93050		AKAP8_HUMAN	O43823		ECHB_HUMAN	P55084		PF2R_HUMAN	P43088		ATXN3	P54252		P55285		Q8N6C5		P32121			P01225	P55285	P06850
	ATP6V0D1	P61421		AKP8L_HUMAN	Q9ULX6		GLO2_HUMAN	Q16775		FPRP_HUMAN	Q9P2B2		ATXN7	O15265		Q9BYE9		Q6WRI0		P51689			O95633	Q9BYE9	P50238
	ATP6V1A	P38606		AKAP9_HUMAN	Q99996		HUTH_HUMAN	P42357		PTGIS_HUMAN	Q16647		ATXN7L1	Q9ULK2		Q9HBB8		Q96ID5		P54793			O95954	Q9HBB8	Q9H336
	ATP6V1B2	P21281		AKNA_HUMAN	Q7Z591		HAND1_HUMAN	O96004		PTGR1_HUMAN	Q14914		AUH	Q13825		O95674		Q9NX62		P52961			Q9C0B1	O95674	Q9BZJ0
	ATP6V1C1	P21283		AK1A1_HUMAN	P14550		HAND2_HUMAN	P61296		PTGR2_HUMAN	Q8N8N7		AURKA	O14965		Q9UKY7		O15327		Q9ULX3			Q96I24	Q9UKY7	Q9UKG9
	ATP6V1E1	P36543		ALDR_HUMAN	P15121		HAOX1_HUMAN	Q9UJM8		PGH1_HUMAN	P23219		AURKB	Q96GD4		P13688		Q8WZA9		Q96L15			P54710	P13688	P02489
	ATP6V1G1	O75348		AK1C1_HUMAN	Q04828		HAOX2_HUMAN	Q9NYQ3		PGH2_HUMAN	P35354		AUTS2	Q8WXX7		P06731		Q6UXK2		O00192			O15117	P06731	P05813
	ATP6V1H	Q9UI12		AK1C3_HUMAN	P42330		APEX1_HUMAN	P27695		PTHY_HUMAN	P01270		AVIL	O75366		P31997		B1AKI9		Q9HBK9			O95866	P31997	Q9Y600
	ATP8A1	Q9Y2Q0		AK1C4_HUMAN	P17516		HAP1_HUMAN	P54257		PTH1R_HUMAN	Q03431		AVPR1A	P37288		Q9NZK5		Q96CN7		Q8TDY4			P34059	Q9NZK5	P32927
	ATPIF1	Q9UII2		AK1D1_HUMAN	P51857		HPLN1_HUMAN	P10915		PTH2R_HUMAN	P49190		AXIN1	O15169		Q8WUJ3		Q9BX67		Q9Y576			Q86SR1	Q8WUJ3	P09919
	ATRN	O75882		ARK72_HUMAN	O43488		HPLN3_HUMAN	Q96S86		PTHR_HUMAN	P12272		AXIN2	Q9Y2T1		P23141		Q86YT9		Q8WXI3			Q8IXK2	P23141	Q7Z408
	ATRNL1	Q5VV63		ARK73_HUMAN	O95154		HPLN4_HUMAN	Q86UW8		FAK1_HUMAN	Q05397		AXL	P30530		P11597		Q96MG2		Q8WXH4			Q96FL9	P11597	P48729
	AXL	P30530		AKT2_HUMAN	P31751		SYHC_HUMAN	P12081		FAK2_HUMAN	Q14289		AZGP1	P25311		P00751		Q6UW63		Q8WXK4			Q8N3T1	P00751	P48730
	AZGP1	P25311		AKT3_HUMAN	Q9Y243		SYHM_HUMAN	P49590		PTK6_HUMAN	Q13882		AZU1	P20160		P00746		O60268		Q8WXK3			Q8N428	P00746	P28325
	AZU1	P20160		AKTIP_HUMAN	Q9H8T0		DTD1_HUMAN	Q8TEA8		PTK7_HUMAN	Q13308		B2M	P61769		P08603		Q6ZU35		Q8WXK1			Q6P9A2	P08603	P33240
	B2M	P61769		HEM2_HUMAN	P13716		HYAS1_HUMAN	Q92839		PTMA_HUMAN	P06454		B3GALNT1	O75752		Q03591		Q6ZVL6		Q96NS5			Q14435	Q03591	O15320
	B3GALNT1	O75752		HEM1_HUMAN	P13196		HYAS3_HUMAN	O00219		PTN_HUMAN	P21246		B3GNT2	Q9NY97		P36980		Q86Z14		Q96Q27			Q7Z7M9	P36980	Q13363
	B3GAT3	O94766		HEM0_HUMAN	P22557		HAT1_HUMAN	O14929		PTOV1_HUMAN	Q86YD1		B4GALT1	P15291		Q02985		Q53G59		Q9Y575			Q8NCL4	Q02985	P56545
	B3GNT2	Q9NY97		ALBU_HUMAN	P02768		HAUS1_HUMAN	Q96CS2		PTN1_HUMAN	P18031		B4GAT1	O43505		Q92496		P26718		Q9Y574			Q86SF2	Q92496	Q9GZU7
	B3GNT7	Q8NFL0		FBF1_HUMAN	Q8TES7		HAUS2_HUMAN	Q9NVX0		PTN11_HUMAN	Q06124		BACH1	O14867		Q9BXR6		O00629		Q8WWX0			P54826	Q9BXR6	P26232
	B3GNT8	Q7Z7M8		CD166_HUMAN	Q13740		HAUS7_HUMAN	Q99871		PTN12_HUMAN	Q05209		BACH2	Q9BYV9		P05156		Q5T749		Q9NWX5			Q14393	P05156	P43235
	B4GALNT1	Q00973		A16A1_HUMAN	Q8IZ83		HAUS8_HUMAN	Q9BT25		PTN13_HUMAN	Q12923		BAG2	O95816		P23528		Q6A163		Q9H765			P01350	P23528	Q8WZ74
	B4GALT1	P15291		P5CS_HUMAN	P54886		HAVR2_HUMAN	Q8TDQ0		PTN14_HUMAN	Q15678		BAG3	O95817		Q9Y281		Q5XKE5		Q96DX5			P04062	Q9Y281	Q13620
	B4GALT2	O60909		AL1A1_HUMAN	P00352		HAX1_HUMAN	O00165		PTN18_HUMAN	Q99952		BAIAP2	Q9UQB8		P27918		P78385		Q8N3C0			O75323	P27918	Q8IWT3
	B4GALT3	O60512		AL1A2_HUMAN	O94788		HBA_HUMAN	P69905		PTN21_HUMAN	Q16825		BAMBI	Q13145		Q9P2M7		Q8IUC1		Q99929			Q02742	Q9P2M7	O14529
	B4GAT1	O43505		AL1A3_HUMAN	P47895		HBB_HUMAN	P68871		PTN22_HUMAN	Q9Y2R2		BANF1	O75531		Q99674		Q8IUC0		Q9NR48			Q8N0V5	Q99674	P78423
	BAAT	Q14032		AL1B1_HUMAN	P30837		HBD_HUMAN	P02042		PTN23_HUMAN	Q9H3S7		BARD1	Q99728		O15335		Q3LI72		Q9UBL3			O95390	O15335	P49238
	BACE1	P56817		AL1L1_HUMAN	O75891		HBE_HUMAN	P02100		PTN3_HUMAN	P26045		BASP1	P80723		P10645		Q9BYR5		P78348			P56159	P10645	P09341
	BAG3	O95817		ALDH2_HUMAN	P05091		HBEGF_HUMAN	Q99075		PTN4_HUMAN	P29074		BAZ1B	Q9UIG0		P05060		Q9BYR4		P46597			O00451	P05060	P02778
	BAG6	P46379		AL3A1_HUMAN	P30838		HBG1_HUMAN	P69891		PTN5_HUMAN	P54829		BAZ2A	Q9UIF9		P36222		Q9BYR3		O95671			O60609	P36222	P19875
	BANF1	O75531		AL3A2_HUMAN	P51648		HBG2_HUMAN	P69892		PTN6_HUMAN	P29350		BBC3	Q96PG8		Q15782		Q9BYQ3		P08243			P36269	Q15782	P19876
	BASP1	P80723		AL4A1_HUMAN	P30038		HBP1_HUMAN	O60381		PTN7_HUMAN	P35236		BBS7	Q8IWZ6		Q13231		Q96EM0		P45381			Q9UJ14	Q13231	P42830
	BAX	Q07812		SSDH_HUMAN	P51649		HDBP1_HUMAN	Q8IV16		PTN9_HUMAN	P43378		BCAM	P50895		O00533		Q53H82		Q9BZE9			P01241	O00533	Q07325
	BBOX1	O75936		MMSA_HUMAN	Q02252		HBS1L_HUMAN	Q9Y450		PTPRA_HUMAN	P18433		BCAN	Q96GW7		Q9H2X0		P18627		Q2TB18			P10912	Q9H2X0	P05093
	BCAM	P50895		AL7A1_HUMAN	P49419		HBAZ_HUMAN	P02008		PTPRB_HUMAN	P23467		BCAR1	P56945		Q14011		Q6IAA8		Q8IXJ9			P06280	Q14011	P04798
	BCAN	Q96GW7		AL9A1_HUMAN	P49189		HCAR1_HUMAN	Q9BXC0		PTPRC_HUMAN	P08575		BCAS3	Q9H6U6		Q14008		Q13094		Q86WG3			P23378	Q14008	P08686
	BCAP31	P51572		ALDOA_HUMAN	P04075		HCAR3_HUMAN	P49019		PTCA_HUMAN	Q14761		BCHE	P06276		P12277		Q6P5S2		O95260			Q6ZMI3	P12277	P11509
	BCAT1	P54687		ALDOB_HUMAN	P05062		CCHL_HUMAN	P53701		PTPRD_HUMAN	P23468		BCKDHA	P12694		P06732		O95202		P15336			Q9HC38	P06732	P20813
	BCAT2	O15382		ALDOC_HUMAN	P09972		HCFC1_HUMAN	P51610		PTPRE_HUMAN	P23469		BCL11A	Q9H165		P17540		Q6ZUX7		P18847			O76003	P17540	P33260
	BCHE	P06276		ALG11_HUMAN	Q2TAA5		HCK_HUMAN	P08631		PTPRF_HUMAN	P10586		BCL11B	Q9C0K0		Q9Y240		A6NI73		P18848			Q86SX6	Q9Y240	P33261
	BCL2L13	Q9BXK5		ALG12_HUMAN	Q9BV10		HCLS1_HUMAN	P14317		PTPRG_HUMAN	P23470		BCL2	P10415		P05452		Q6PI73		P17544			O94925	P05452	P10632
	BCLAF1	Q9NYF8		PDCD6_HUMAN	O75340		HCN1_HUMAN	O60741		PTPRJ_HUMAN	Q12913		BCL2L13	Q9BXK5		O00299		Q96FE5		Q6VMQ6			Q9NZD2	O00299	P08684
	BGLAP	P02818		ALG2_HUMAN	Q9H553		HCN2_HUMAN	Q9UL51		PTPRK_HUMAN	Q15262		BCL3	P20749		Q14677		P38571		Q5U623			O60547	Q14677	Q9HB55
	BGN	P21810		ALG3_HUMAN	Q92685		HCN3_HUMAN	Q9P1Z3		PTPRM_HUMAN	P28827		BCLAF1	Q9NYF8		P30622		Q6P1A2		O94817			P04899	P30622	Q9HBI6
	BHMT	Q93088		ALG5_HUMAN	Q9Y673		HCN4_HUMAN	Q9Y3Q4		PTPRN_HUMAN	Q16849		BDNF	P23560		Q9UDT6		Q9H756		O75143			P50148	Q9UDT6	Q15438
	BHMT2	Q9H2M3		ALG8_HUMAN	Q9BVK2		OREX_HUMAN	O43612		PTPR2_HUMAN	Q92932		BHMT	Q93088		P04118		Q8N9N7		Q96BY7			P19086	P04118	Q9NRR1
	BID	P55957		ALK_HUMAN	Q9UM73		OX1R_HUMAN	O43613		PTPRO_HUMAN	Q16827		BIN3	Q9NQY0		O94985		Q96AG4		Q96DT6			P62879	O94985	P98082
	BIN1	O00499		ALKB1_HUMAN	Q13686		OX2R_HUMAN	O43614		PTPRR_HUMAN	Q15256		BIRC3	Q13489		Q9BQT9		Q6UXK5		Q86TL0			P36915	Q9BQT9	P51398
	BIN2	Q9UBW5		ALLC_HUMAN	Q8N6M5		HDAC1_HUMAN	Q13547		PTPRS_HUMAN	Q13332		BIRC6	Q9NR09		P09496		Q86X29		Q32M88			Q14749	P09496	P11182
	BLMH	Q13867		LOX12_HUMAN	P18054		HDA10_HUMAN	Q969S8		PTPRT_HUMAN	O14522		BIRC8	Q96P09		P09497		Q9BS40		O43313			P46926	P09497	Q9UHG0
	BLVRA	P53004		LX12B_HUMAN	O75342		HDA11_HUMAN	Q96DB2		PTPRU_HUMAN	Q92729		BLM	P54132		Q00610		Q5SQ64		O60312			Q96EK6	Q00610	Q9NPI6
	BLVRB	P30043		LOX15_HUMAN	P16050		HDAC2_HUMAN	Q92769		PTPRZ_HUMAN	P23471		BLMH	Q13867		P53675		Q9BZG9		O94823			Q3T906	P53675	Q8NEL9
	BMP1	P13497		LX15B_HUMAN	O15296		HDAC3_HUMAN	O15379		CAVN1_HUMAN	Q6NZI2		BLOC1S4	Q9NUP1		P10909		Q5VWZ2		Q9P241			O00461	P10909	P30046
	BMP10	O95393		LOX5_HUMAN	P09917		HDAC4_HUMAN	P56524		PTH2_HUMAN	Q9Y3E5		BLOC1S5	Q8TDH9		P30085		Q8WZA0		Q9Y2G3			P55259	P30085	Q9NVP1
	BMP4	P12644		LOXE3_HUMAN	Q9BYJ1		HDAC5_HUMAN	Q9UQL6		PTPS_HUMAN	Q03393		BLVRA	P53004		P62633		Q9H0U3		Q9H7F0			P14770	P62633	Q9UMR2
	BMP6	P22004		PPBI_HUMAN	P09923		HDAC6_HUMAN	Q9UBN7		PITX3_HUMAN	O75364		BLVRB	P30043		Q96KN2		Q5SRI9		Q4VNC1			P35052	Q96KN2	Q9UHI6
	BOC	Q9BWV1		PPBT_HUMAN	P05186		HDAC7_HUMAN	Q8WUI4		PTX3_HUMAN	P26022		BMP1	P13497		Q96KP4		Q5VSG8		P13637			Q9Y625	Q96KP4	Q9GZR7
	BOLA2	Q9H3K6		PPB1_HUMAN	P05187		HDAC8_HUMAN	Q9BY41		PUF60_HUMAN	Q9UHX1		BMP3	P12645		Q99439		Q02750		Q13733			O15354	Q99439	Q9UHL0
	BPGM	P07738		PPBN_HUMAN	P10696		HDAC9_HUMAN	Q9UKV0		PUM1_HUMAN	Q14671		BMPER	Q8N8U9		Q15417		Q9NZL9		O75185			P43250	Q15417	O15523
	BPHL	Q86WA6		ALS2_HUMAN	Q96Q42		DCHS_HUMAN	P19113		PUM2_HUMAN	Q8TB72		BNC1	Q01954		A5YKK6		Q68D91		P51164			P49841	A5YKK6	Q9UJV9
	BPIFA1	Q9NP55		AL2CL_HUMAN	Q60I27		HDGF_HUMAN	P51858		PURA_HUMAN	Q00577		BOK	Q9UMX3		P09543		Q8NE86		P05496			P21266	P09543	Q86XP3
	BPIFB1	Q8TDL5		AL2SB_HUMAN	Q96Q35		HDHD1_HUMAN	Q08623		TRUA_HUMAN	Q9Y606		BPGM	P07738		Q9Y2B0		Q96KG7		Q99766			Q03013	Q9Y2B0	Q7L014
	BPIFB2	Q8N4F0		ALX3_HUMAN	O95076		VIGLN_HUMAN	Q00341		PUS3_HUMAN	Q9BZE2		BPIFA1	Q9NP55		P26992		Q9BUN1		O75787			O43708	P26992	Q9H0S4
	BPNT1	O95861		ALX4_HUMAN	Q9H161		HEAT1_HUMAN	Q9H583		PUS7_HUMAN	Q96PZ0		BPIFB1	Q8TDL5		Q12860		Q9H3U5		Q9HBG4			Q16774	Q12860	Q9BQ39
	BRK1	Q8WUW1		THOC4_HUMAN	Q86V81		DAAF5_HUMAN	Q86Y56		PUSL1_HUMAN	Q8N0Z8		BPIFB2	Q8N4F0		Q02246		Q9UQ53		P15313			P46976	Q02246	Q8TDD1
	BROX	Q5VW32		AMACR_HUMAN	Q9UHK6		HEAT3_HUMAN	Q7Z4Q2		PVR_HUMAN	P15151		BPIFB3	P59826		Q9P232		Q7Z6M3		Q9Y5K8			Q16836	Q9P232	P26196
	BSG	P35613		AMBN_HUMAN	Q9NP70		HDC_HUMAN	Q9UBI9		NECT1_HUMAN	Q15223		BPTF	Q12830		Q8IWV2		Q8N5J2		Q16864			P55084	Q8IWV2	P59665
	BST1	Q10588		AMBP_HUMAN	P02760		HECD1_HUMAN	Q9ULT8		NECT2_HUMAN	Q92692		BRCA1	P38398		O94779		Q9H8M7		O95670			Q9UJM8	O94779	Q01523
	BTD	P43251		DCAM_HUMAN	P17707		HECW2_HUMAN	Q9P2P5		NECT3_HUMAN	Q9NQS3		BRIX1	Q8TDN6		O43405		Q96T76		Q96LB4			Q8TDQ0	O43405	Q01524
	BTF3	P20290		HUTI_HUMAN	Q96NU7		HEG1_HUMAN	Q9ULI3		PWP2_HUMAN	Q15269		BRPF1	P55201		P12107		Q70IA8		P35670			P02008	P12107	P35659
	BTK	Q06187		AMER3_HUMAN	Q8N944		HELB_HUMAN	Q8NG08		PXDN_HUMAN	Q92626		BRPF3	Q9ULD4		P13942		Q9BV20		Q9NTI2			Q9UBN7	P13942	Q8TEH3
	BTLA	Q7Z6A9		AMFR_HUMAN	Q9UKV5		HELZ_HUMAN	P42694		PXMP2_HUMAN	Q9NR77		BRS3	P32247		Q99715		Q9Y6F6		O43520			Q9H583	Q99715	Q9BUN8
	BUB3	O43684		MIS_HUMAN	P03971		HELZ2_HUMAN	Q9BYK8		P5CR1_HUMAN	P32322		BRSK1	Q8TDC3		Q05707		P00403		P98198			Q9BQS7	Q05707	Q96Q80
	BZW1	Q7L1Q6		AMHR2_HUMAN	Q16671		HEMK1_HUMAN	Q9Y5R4		PYGB_HUMAN	P11216		BRWD1	Q9NSI6		P39059		Q9Y6C9		O60423			Q6ZVN8	P39059	O00273
	C10orf54	Q9H7M9		AMMR1_HUMAN	Q9Y4X0		HEPH_HUMAN	Q9BQS7		PYGL_HUMAN	P06737		BSN	Q9UPA5		P39060		Q8N307		O75110			Q96JK4	P39060	Q8WYQ5
	C11orf54	Q9H0W9		AMNLS_HUMAN	Q9BXJ7		HERC3_HUMAN	Q15034		PYGM_HUMAN	P11217		BST1	Q10588		P02452		Q9BRK3		O43861			P62805	P02452	Q9Y6T7
	C12orf49	Q9H741		AMOL2_HUMAN	Q9Y2J4		HERC4_HUMAN	Q5GLZ8		PYGO1_HUMAN	Q9Y3Y4		BST2	Q10589		P08123		Q8N699		P20848			P01889	P08123	Q16760
	C14orf166	Q9Y224		AMPD1_HUMAN	P23109		HERC5_HUMAN	Q9UII4		PYGO2_HUMAN	Q9BRQ0		BTAF1	O14981		P02461		P10916		Q13535			P20036	P02461	P49619
	C14orf37	Q86TY3		AMPD2_HUMAN	Q01433		HERP1_HUMAN	Q15011		PYRD1_HUMAN	Q8WU10		BTD	P43251		P08572		B0I1T2		P46100			P04440	P08572	P52824
	C16orf89	Q6UX73		AMPD3_HUMAN	Q01432		ES1_HUMAN	P30042		PYY_HUMAN	P10082		BTF3	P20290		P20908		Q5VTT5		P54253			P13747	P20908	Q13574
	C1GALT1	Q9NS00		AMPH_HUMAN	P49418		HES1_HUMAN	Q14469		PZP_HUMAN	P20742		BTK	Q06187		P05997		Q4G0N4		Q9UBB4			Q96RW7	P05997	P49366
	C1orf123	Q9NWV4		GCST_HUMAN	P48728		HES2_HUMAN	Q9Y543		SYEP_HUMAN	P07814		C14orf39	Q8N1H7		P12109		P54920		Q99700			P09601	P12109	Q96HY7
	C1orf198	Q9H425		AMYP_HUMAN	P04746		HES4_HUMAN	Q9HCC6		SYQ_HUMAN	P47897		C17orf75	Q9HAS0		P12110		Q8IW45		Q9Y679			Q5SSJ5	P12110	Q7Z478
	C1QA	P02745		AMY2B_HUMAN	P19961		HES6_HUMAN	Q96HZ4		DHPR_HUMAN	P09417		C1QA	P02745		P12111		Q8NCW5		Q9UQB9			P05981	P12111	Q9H5Z1
	C1QB	P02746		APC1_HUMAN	Q9H1A4		HESX1_HUMAN	Q9UBX0		QKI_HUMAN	Q96PU8		C1QB	P02746		Q9Y6Z7		Q6ZNJ1		Q9NQS1			Q9Y251	Q9Y6Z7	Q92620
	C1QBP	Q07021		APC10_HUMAN	Q9UM13		HEXA_HUMAN	P06865		QPCT_HUMAN	Q16769		C1QBP	Q07021		Q9BWP8		Q969V3		P47901			P23327	Q9BWP8	Q14562
	C1QC	P02747		APC16_HUMAN	Q96DE5		HEXB_HUMAN	P07686		NADC_HUMAN	Q15274		C1QC	P02747		P49747		Q68D85		P30518			P28845	P49747	O60879
	C1QTNF1	Q9BXJ1		APC4_HUMAN	Q9UJX5		HEXI2_HUMAN	Q96MH2		OX26_HUMAN	P83859		C1QL1	O75973		P21964		O43678		Q5T1B0			Q92506	P21964	Q9NSV4
	C1QTNF3	Q9BXJ4		APC5_HUMAN	Q9UJX4		RGMC_HUMAN	Q6ZVN8		QRFPR_HUMAN	Q96P65		C1QTNF3	Q9BXJ4		P53621		O00483		O14977			P48723	P53621	Q9UPY3
	C1QTNF5	Q9BXJ0		APC7_HUMAN	Q9UJX3		HGD_HUMAN	Q93099		QRIC1_HUMAN	Q2TAL8		C1QTNF7	Q9BXJ2		P53618		P51970		O43825			P0DMV8	P53618	Q9BTC0
	C1R	P00736		ANGI_HUMAN	P03950		HGF_HUMAN	P14210		QSOX1_HUMAN	O00391		C1R	P00736		P35606		O96000		O96024			O14558	P35606	Q9Y2E4
	C1RL	Q9NZP8		ANGE1_HUMAN	Q9UNK9		HGFA_HUMAN	Q04756		TGT_HUMAN	Q9BXR0		C1RL	Q9NZP8		Q9Y678		Q9NVZ3		Q96L58			Q92598	Q9Y678	Q9Y2L1
	C1S	P09871		ANGE2_HUMAN	Q5VTE6		HGS_HUMAN	O14964		QTRT2_HUMAN	Q9H974		C1S	P09871		Q9UBF2		Q8NBF2		Q9P2W7			Q7Z6Z7	Q9UBF2	Q9NRI5
	C2	P06681		ANGP1_HUMAN	Q15389		HHATL_HUMAN	Q9HCP6		R3HD1_HUMAN	Q15032		C2	P06681		P31146		Q5JS37		Q9NPZ5			P22304	P31146	Q96QB1
	C20orf27	Q9GZN8		ANGP2_HUMAN	O15123		HHEX_HUMAN	Q03014		R3HD2_HUMAN	Q9Y2K5		C3	P01024		Q9BR76		Q8N2Q7		Q9Y2A9			P80217	Q9BR76	Q9Y238
	C21orf33	P30042		ANGP4_HUMAN	Q9Y264		HIPL1_HUMAN	Q96JK4		RAB10_HUMAN	P61026		C4A	P0C0L4		Q9ULV4		Q86UT6		O43286			P48551	Q9ULV4	Q92796
	C2orf88	Q9BSF0		ANGL1_HUMAN	O95841		MF14A_HUMAN	Q96MC6		RB11A_HUMAN	P62491		C4B	P0C0L5		Q14019		Q6P988		Q9UBV7			P78318	Q14019	Q15398
	C3	P01024		ANGL2_HUMAN	Q9UKU9		3HIDH_HUMAN	P31937		RFIP3_HUMAN	O75154		C4BPA	P04003		P20674		Q9BXD5		Q9Y5Z0			P01877	P20674	Q9NYJ7
	C4A	P0C0L4		ANGL3_HUMAN	Q9Y5C1		HIC1_HUMAN	Q14526		RFIP5_HUMAN	Q9BXF6		C4BPB	P20851		P14854		Q9Y639		Q92934			P01857	P14854	Q9NPF5
	C4B	P0C0L5		ANGL4_HUMAN	Q9BY76		HIC2_HUMAN	Q96JB3		RAB13_HUMAN	P51153		C5	P01031		P00450		Q9UHY1		Q9UL15			P01860	P00450	P11532
	C4BPA	P04003		ANGL6_HUMAN	Q8NI99		HIF1A_HUMAN	Q16665		RAB14_HUMAN	P61106		C6	P13671		Q9UI42		Q8TCD5		Q86Y30			P01861	Q9UI42	P51530
	C4BPB	P20851		ANK1_HUMAN	P16157		HIF1N_HUMAN	Q9NWT6		RAB15_HUMAN	P59190		C7	P10643		P15086		Q9Y266		Q86Y28			P01871	P15086	Q8TD57
	C4orf48	Q5BLP8		ANK2_HUMAN	Q01484		HINFP_HUMAN	Q9BQA5		RAB17_HUMAN	Q9H0T7		C8A	P07357		Q96IY4		O95989		Q6UXY1			Q969P0	Q96IY4	Q8TE73
	C5	P01031		ANK3_HUMAN	Q12955		HINT1_HUMAN	P49773		RAB18_HUMAN	Q9NP72		C8B	P07358		P16870		Q969Y0		O94812			P78552	P16870	Q9C0G6
	C6	P13671		ANKE1_HUMAN	Q9NU02		HINT2_HUMAN	Q9BX68		RAB1A_HUMAN	P62820		C8G	P07360		P14384		P04181		Q16611			Q96F46	P14384	Q8WXX0
	C7	P10643		ANFY1_HUMAN	Q9P2R3		HIP1_HUMAN	O00291		RAB1B_HUMAN	Q9H0U4		C9	P02748		P15169		Q6UWY5		Q9BZE3			O95998	P15169	Q96JB1
	C8A	P07357		ANKH_HUMAN	Q9HCJ1		HIP1R_HUMAN	O75146		RAB20_HUMAN	Q9NX57		C9orf3	Q8N6M6		P22792		Q86WC4		Q9NY43			P14778	P22792	Q9NYC9
	C8B	P07358		AKIB1_HUMAN	Q9P2G1		HIPK1_HUMAN	Q86Z02		RAB21_HUMAN	Q9UL25		CA1	P00915		Q99829		O95747		Q9HBU1			Q6UWB1	Q99829	Q9UI46
	C8G	P07360		ANKL1_HUMAN	Q8NAG6		HIPK2_HUMAN	Q9H2X6		RB22A_HUMAN	Q9UL26		CA2	P00918		O75131		Q32P28		Q9NRL2			P31785	O75131	Q9UDY4
	C9	P02748		ANKY1_HUMAN	Q9P2S6		HIPK3_HUMAN	Q9H422		RAB23_HUMAN	Q9ULC3		CA3	P07451		Q9Y646		P68402		Q9UIF8			P16871	Q9Y646	Q99543
	C9orf142	Q9BUH6		ANRA2_HUMAN	Q9H9E1		HIRA_HUMAN	P54198		RAB24_HUMAN	Q969Q5		CAB39	Q9Y376		P31327		Q6UXH9		Q9BXH1			Q16891	P31327	Q9UQ16
	C9orf40	Q8IXQ3		ANKR1_HUMAN	Q15327		HIRP3_HUMAN	Q9BW71		RB27A_HUMAN	P51159		CAB39L	Q9H9S4		Q16630		Q9BVG4		Q8NFJ9			P29218	Q16630	P26358
	CA1	P00915		ANR10_HUMAN	Q9NXR5		H11_HUMAN	Q02539		RB27B_HUMAN	O00194		CABIN1	Q9Y6J0		P50416		P30039		Q9BXC9			Q27J81	P50416	Q9Y6K1
	CA12	O43570		ANR11_HUMAN	Q6UB99		H15_HUMAN	P16401		RAB28_HUMAN	P51157		CABLES1	Q8TDN4		P23786		Q8NBM8		Q96RK4			P49441	P23786	P04053
	CA13	Q8N1Q1		ANR12_HUMAN	Q6UB98		H12_HUMAN	P16403		RAB2A_HUMAN	P61019		CACNA1A	O00555		P17927		Q9BUL8		Q8WY36			Q96P70	P17927	Q9H147
	CA2	P00918		AN13A_HUMAN	Q8IZ07		H14_HUMAN	P10412		RAB2B_HUMAN	Q8WUD1		CACNA1B	Q00975		P20023		Q9BQ51		Q9UHQ4			O14498	P20023	Q14185
	CA3	P07451		ANR17_HUMAN	O75179		H1T_HUMAN	P22492		RAB30_HUMAN	Q15771		CACNA1D	Q01668		P24387		P04085		O75815			Q96AB3	P24387	Q96BY6
	CA4	P22748		AN18A_HUMAN	Q8IVF6		H2A1A_HUMAN	Q96QV6		RAB31_HUMAN	Q13636		CACNA1F	O60840		P54108		Q9GZP0		O75363			Q8TB96	P54108	Q92608
	CA6	P23280		ANKR2_HUMAN	Q9GZV1		H2B1A_HUMAN	Q96A08		RAB32_HUMAN	Q13637		CACNA1G	O43497		P46109		Q9UBV8		Q8TDM0			Q9UKX5	P46109	Q8N1I0
	CAB39	Q9Y376		A20A1_HUMAN	Q5TYW2		H2B1D_HUMAN	P58876		RB33B_HUMAN	Q9H082		CACNA1I	Q9P0X4		Q8IUI8		O96011		P21953			P26006	Q8IUI8	Q9BZ29
	CACHD1	Q5VU97		ANR26_HUMAN	Q9UPS8		H2B1C_HUMAN	P62807		NARR_HUMAN	P0DI83		CACNA2D1	P54289		P02741		Q99471		O14874			Q13683	P02741	Q18PE1
	CACNA2D1	P54289		ANR28_HUMAN	O15084		H2B1H_HUMAN	Q93079		RAB34_HUMAN	Q9BZG1		CACNB4	O00305		Q9NQ79		Q6PCE3		O95999			Q13797	Q9NQ79	Q9NYP3
	CACNA2D2	Q9NY47		ANR35_HUMAN	Q8N283		H2B1C_HUMAN	P62807		RAB35_HUMAN	Q15286		CACYBP	Q9HB71		P53674		A6NDG6		Q07817			P38570	P53674	Q8TEK3
	CACNA2D3	Q8IZS8		ANR50_HUMAN	Q9ULJ7		H2B1K_HUMAN	O60814		RAB36_HUMAN	O95755		CAD	P27708		Q9Y2S2		O15173		Q9HD36			P20701	Q9Y2S2	Q92785
	CACYBP	Q9HB71		ANKR6_HUMAN	Q9Y2G4		H2B1L_HUMAN	Q99880		RAB37_HUMAN	Q96AX2		CADM1	Q9BY67		Q08257		Q9NRX4		Q9HB09			P11215	Q08257	O60762
	CAD	P27708		ANKR9_HUMAN	Q96BM1		H4G_HUMAN	Q99525		RAB38_HUMAN	P57729		CADPS	Q9ULU8		O75390		Q8IUZ5		Q92843			P06756	O75390	Q6V1X1
	CADM1	Q9BY67		ANS1A_HUMAN	Q92625		H2A3_HUMAN	Q7L7L0		RB39B_HUMAN	Q96DA2		CALB2	P22676		O75534		Q9UKJ1		P41182			Q86UX2	O75534	O14531
	CADM2	Q8N3J6		ANS4B_HUMAN	Q8N8V4		H4_HUMAN	P62805		RAB3D_HUMAN	O95716		CALCA	P06881		P55060		Q9GZP4		Q8N143			Q9Y287	P55060	Q9BPU6
	CADM3	Q8N126		ANLN_HUMAN	Q9NQW6		ZEP1_HUMAN	P15822		RB3GP_HUMAN	Q15042		CALCB	P10092		P09603		Q504Y2		O00512			Q9BY32	P09603	Q92597
	CADM4	Q8NFZ8		ANO1_HUMAN	Q5XXA6		ZEP2_HUMAN	P31629		RB40B_HUMAN	Q12829		CALCRL	Q16602		P07333		Q86WI1		Q86UU0			P26440	P07333	Q9Y295
	CALB2	P22676		ANO2_HUMAN	Q9NQ90		ZEP3_HUMAN	Q5T1R4		RB40C_HUMAN	Q96S21		CALD1	Q05682		P41240		P14555		Q9HAY6			Q9Y219	P41240	P55039
	CALCOCO1	Q9P1Z2		ANO3_HUMAN	Q9BYT9		HXK1_HUMAN	P19367		RAB43_HUMAN	Q86YS6		CALM1	P0DP23		P67870		Q13018		Q9BYV7			P57087	P67870	O60469
	CALD1	Q05682		AN32A_HUMAN	P39687		HXK2_HUMAN	P52789		RAB4A_HUMAN	P20338		CALM2	P0DP24		P21291		Q03405		Q6W2J9			O60229	P21291	O14972
	CALM1	P62158		AN32B_HUMAN	Q92688		HXK3_HUMAN	P52790		RAB4B_HUMAN	P61018		CALM3	P0DP25		P50461		Q8IV08		P11274			Q15046	P50461	P32926
	CALML3	P27482		AN32C_HUMAN	O43423		HKR1_HUMAN	P10072		RAB5A_HUMAN	P20339		CALML3	P27482		P01037		Q9H8W4		Q9Y276			Q07666	P01037	Q9H410
	CALML5	Q9NZT1		AN32D_HUMAN	O95626		1A68_HUMAN	P01891		RAB5B_HUMAN	P61020		CALML5	Q9NZT1		P01034		Q8TD55		Q02338			Q8IZA0	P01034	Q03001
	CALR	P27797		AN32E_HUMAN	Q9BTT0		1A02_HUMAN	P01892		RAB5C_HUMAN	P51148		CALR	P27797		Q15828		Q9HBL7		P46663			Q96J84	Q15828	Q9Y4J8
	CALU	O43852		AMPN_HUMAN	P15144		1A03_HUMAN	P04439		RAB6C_HUMAN	Q9H0N0		CALR3	Q96L12		O76096		Q04941		Q14457			P06870	O76096	O60941
	CAMK1	Q14012		ANTR2_HUMAN	P58335		1A24_HUMAN	P05534		RAB7A_HUMAN	P51149		CALU	O43852		P01040		O75051		Q9BUH8			O43240	P01040	Q13115
	CAMK2A	Q9UQM7		ANXA1_HUMAN	P04083		1A32_HUMAN	P10314		RAB7L_HUMAN	O14966		CAMK1	Q14012		P04080		O60486		Q8NFU1			P49862	P04080	Q16828
	CAMK2B	Q13554		ANX10_HUMAN	Q9UJ72		1A69_HUMAN	P10316		RAB8A_HUMAN	P61006		CAMK1D	Q8IU85		Q01459		Q6GTS8		Q8N1M1			P01116	Q01459	O14640
	CAMK2D	Q13557		ANX11_HUMAN	P50995		1A11_HUMAN	P13746		RAB8B_HUMAN	Q92930		CAMK1G	Q96NX5		O15194		Q8N490		Q8NFU0			Q96MU8	O15194	Q9NP97
	CAMK2G	Q13555		ANX13_HUMAN	P27216		1A30_HUMAN	P16188		RABE1_HUMAN	Q15276		CAMK2A	Q9UQM7		P29279		Q7Z5L7		O15155			P05783	P29279	Q92630
	CAMP	P49913		ANXA2_HUMAN	P07355		1A31_HUMAN	P16189		RABX5_HUMAN	Q9UJ41		CAMK2B	Q13554		P35221		Q8WZA1		Q9NYM9			Q9C075	P35221	Q01094
	CAND1	Q86VP6		ANXA3_HUMAN	P12429		1A33_HUMAN	P16190		PGTA_HUMAN	Q92696		CAMK2D	Q13557		P35222		A5A3E0		Q5H9J7			Q14532	P35222	Q14209
	CANT1	Q8WVQ1		ANXA4_HUMAN	P09525		1A25_HUMAN	P18462		PGTB2_HUMAN	P53611		CAMK2G	Q13555		O60716		P0CG39		Q12934			O76009	O60716	O75461
	CANX	P27824		ANXA5_HUMAN	P08758		1A01_HUMAN	P30443		RAC1_HUMAN	P63000		CAMSAP3	Q9P1Y5		P07858		Q9H2H8		Q13515			O43790	P07858	Q9NTX5
	CAP1	Q01518		ANXA6_HUMAN	P08133		1A23_HUMAN	P30447		RAC2_HUMAN	P15153		CAND1	Q86VP6		P53634		Q96SB3		Q7RTS1			Q3LI77	P53634	Q9UNE0
	CAPG	P40121		ANXA7_HUMAN	P20073		1A26_HUMAN	P30450		RAC3_HUMAN	P60763		CANX	P27824		P07339		Q96NZ9		O14503			Q16773	P07339	Q92611
	CAPN1	P07384		ANXA8_HUMAN	P13928		1A34_HUMAN	P30453		NCOA3_HUMAN	Q9Y6Q9		CAP1	Q01518		Q9UBX1		Q9Y2Y8		Q9C0J9			Q6GTX8	Q9UBX1	P05305
	CAPN2	P17655		AXA81_HUMAN	Q5VT79		1A36_HUMAN	P30455		RAD17_HUMAN	O75943		CAPG	P40121		P08311		P22694		Q96G01			Q16787	P08311	Q15075
	CAPNS1	P04632		ANXA9_HUMAN	O76027		1A43_HUMAN	P30456		RAD18_HUMAN	Q9NS91		CAPN1	P07384		P09668		P31323		Q8TD16			Q9UQV4	P09668	P68104
	CAPZA1	P52907		AOAH_HUMAN	P28039		1A66_HUMAN	P30457		RAD21_HUMAN	O60216		CAPN2	P17655		P07711		O94903		Q13323			Q9Y2Q5	P07711	O43281
	CAPZA2	P47755		AOC2_HUMAN	O75106		1A74_HUMAN	P30459		RD23A_HUMAN	P54725		CAPNS1	P04632		P25774		O60256		Q13490			Q9UHA4	P25774	Q15029
	CAPZB	P47756		AOC3_HUMAN	Q16853		1A29_HUMAN	P30512		RD23B_HUMAN	P54727		CAPZA1	P52907		P56202		Q96M27		O15392			O43813	P56202	Q9GZT9
	CARHSP1	Q9Y2V2		AOXA_HUMAN	Q06278		1A80_HUMAN	Q09160		RAD50_HUMAN	Q92878		CAPZA2	P47755		Q9UBR2		Q86TP1		Q96CA5			Q8NES3	Q9UBR2	Q96KS0
	CARS	P49589		AP1B1_HUMAN	Q10567		1B07_HUMAN	P01889		RAD51_HUMAN	Q06609		CAPZB	P47756		Q14247		P20962		P51451			Q99538	Q14247	P18146
	CASC4	Q6P4E1		AP1G1_HUMAN	O43747		1B27_HUMAN	P03989		RA51B_HUMAN	O15315		CARD10	Q9BWT7		Q13616		Q12974		Q9H2G9			Q9H008	Q13616	Q8NDI1
	CASP14	P31944		AP1G2_HUMAN	O75843		1B58_HUMAN	P10319		RA51C_HUMAN	O43502		CARD6	Q9BX69		P00167		Q6GMV3		Q96LC9			Q8N6C8	P00167	Q08426
	CASP3	P42574		AP1M1_HUMAN	Q9BXS5		1B37_HUMAN	P18463		RA51D_HUMAN	O75771		CASKIN1	Q8WXD9		O43169		P53801		O95972			Q8NHL6	O43169	Q9H9B1
	CASS4	Q9NQ75		AP1M2_HUMAN	Q9Y6Q5		1B51_HUMAN	P18464		RAD52_HUMAN	P43351		CASP14	P31944		P08574		Q96QR8		P12643			Q8N423	P08574	Q96KQ7
	CAST	P20810		AP1S1_HUMAN	P61966		1B57_HUMAN	P18465		RA54B_HUMAN	Q9Y620		CASP2	P42575		P99999		Q9ULZ3		Q9NSY1			Q8NHJ6	P99999	P41567
	CAT	P04040		AP1S2_HUMAN	P56377		1B08_HUMAN	P30460		ATRX_HUMAN	P46100		CASP3	P42574		Q99418		Q6ZRP7		P22003			Q9UHB6	Q99418	Q9BY44
	CBLN1	P23435		AP2A1_HUMAN	O95782		1B13_HUMAN	P30461		RAD54_HUMAN	Q92698		CASP5	P51878		Q9Y4D1		Q9H2M9		P18075			P11150	Q9Y4D1	Q13144
	CBLN2	Q8IUK8		AP2A2_HUMAN	O94973		1B14_HUMAN	P30462		ARIP4_HUMAN	Q9Y4B4		CASR	P41180		Q14118		P20340		P34820			P49257	Q14118	P20042
	CBLN4	Q9NTU7		AP2M1_HUMAN	Q96CW1		1B15_HUMAN	P30464		RAE1L_HUMAN	P78406		CASS4	Q9NQ75		P14868		Q9NRW1		P36894			Q12907	P14868	P41091
	CBR1	P16152		AP2S1_HUMAN	P53680		1B18_HUMAN	P30466		N2DL4_HUMAN	Q8TD07		CAST	P20810		Q96EP5		P11234		Q13873			Q9UIQ6	Q96EP5	Q99613
	CBR4	Q8N4T8		AP3B1_HUMAN	O00203		1B39_HUMAN	P30475		RET1G_HUMAN	Q6H3X3		CAT	P04040		P09172		P62834		Q14692			P36776	P09172	O15371
	CBSL	P0DN79		AP3B2_HUMAN	Q13367		1B41_HUMAN	P30479		RAF1_HUMAN	P04049		CATSPER2	Q96P56		P07108		Q684P5		P51813			Q96JA1	P07108	Q9NRA8
	CBX1	P83916		AP3D1_HUMAN	O14617		1B42_HUMAN	P30480		RAG1_HUMAN	P15918		CBLN4	Q9NTU7		Q16643		P61225		Q6ZN30			O94898	Q16643	O43432
	CBX3	Q13185		AP3M2_HUMAN	P53677		1B44_HUMAN	P30481		RAI1_HUMAN	Q7Z5J4		CBR1	P16152		Q9UJU6		Q14257		Q12981			Q86VZ4	Q9UJU6	P63241
	CC2D1B	Q5T0F9		AP3S1_HUMAN	Q92572		1B45_HUMAN	P30483		RAI2_HUMAN	Q9Y5P3		CBS	P35520		P43146		Q6JBY9		Q12982			Q14114	P43146	Q9BQ52
	CCAR2	Q8N163		AP3S2_HUMAN	P59780		1B46_HUMAN	P30484		RALA_HUMAN	P11233		CBX3	Q13185		P81605		Q96HR9		Q12983			P42704	P81605	P41970
	CCDC126	Q96EE4		AP4B1_HUMAN	Q9Y6B7		1B47_HUMAN	P30485		RBP1_HUMAN	Q15311		CCBE1	Q6UXH8		Q96JQ0		P48304		O60238			Q8N386	Q96JQ0	Q92979
	CCDC80	Q76M96		AP4E1_HUMAN	Q9UPM8		1B48_HUMAN	P30486		RGPA1_HUMAN	Q6GYQ0		CCDC33	Q8N5R6		O15075		Q9BYZ8		Q7Z465			Q14392	O15075	Q14249
	CCL14	Q16627		AP4M1_HUMAN	O00189		1B49_HUMAN	P30487		RLGPB_HUMAN	Q86X10		CCDC88C	Q9P219		P07585		Q9H4X1		Q9Y3E2			Q9HBW1	P07585	Q96L91
	CCL15	Q16663		AP5M1_HUMAN	Q9H0R1		1B50_HUMAN	P30488		GNDS_HUMAN	Q12967		CCDC9	Q9Y3X0		Q14203		P61586		Q8N9W6			Q8N1G4	Q14203	Q99814
	CCL16	O15467		AP5S1_HUMAN	Q9NUS5		1B52_HUMAN	P30490		RALY_HUMAN	Q9UKM9		CCDC96	Q2M329		Q7Z4W1		Q96DB5		Q14137			Q9NT99	Q7Z4W1	Q12929
	CCL18	P55774		AP5Z1_HUMAN	O43299		1B53_HUMAN	P30491		RALYL_HUMAN	Q86SE5		CCK	P06307		O94760		Q96TC7		Q6PGQ7			Q9Y608	O94760	Q99645
	CCL21	O00585		APAF_HUMAN	O14727		1B54_HUMAN	P30492		RAMP2_HUMAN	O60895		CCL14	Q16627		O95865		P46778		P17213			Q8WUT4	O95865	O15083
	CCL23	P55773		APBA1_HUMAN	Q02410		1B55_HUMAN	P30493		RAN_HUMAN	P62826		CCL15	Q16663		Q16531		P61353		Q96DR5			P33241	Q16531	P19447
	CCL5	P13501		APBA2_HUMAN	Q99767		1B56_HUMAN	P30495		RANG_HUMAN	P43487		CCL16	O15467		Q5TDH0		Q5VT52		Q9BQP9			Q9NS15	Q5TDH0	Q92889
	CCS	O14618		APBA3_HUMAN	O96018		1B78_HUMAN	P30498		RBP17_HUMAN	Q9H2T7		CCL18	P55774		P39656		P62841		P59827			O60449	P39656	P28715
	CCT2	P78371		APBB1_HUMAN	O00213		1B35_HUMAN	P30685		RBP2_HUMAN	P49792		CCL2	P13500		Q92499		Q2MKA7		Q8NFQ5			O95711	Q92499	Q03468
	CCT3	P49368		AB1IP_HUMAN	Q7Z5R6		1B40_HUMAN	Q04826		RANB3_HUMAN	Q9H6Z4		CCL21	O00585		Q92841		Q96FQ6		Q8NFQ6			Q9HBG7	Q92841	Q12809
	CCT4	P50991		APBB2_HUMAN	Q92870		1B82_HUMAN	Q29718		RNBP6_HUMAN	O60518		CCL23	P55773		Q9NR30		Q9NTJ5		P15056			Q9Y6Y9	Q9NR30	Q96RQ1
	CCT5	P48643		APBB3_HUMAN	O95704		1B67_HUMAN	Q29836		RAGP1_HUMAN	P46060		CCL5	P13501		Q13838		Q96BY9		Q7Z569			P07948	Q13838	O75460
	CCT6A	P40227		APC_HUMAN	P25054		1B59_HUMAN	Q29940		RAP1B_HUMAN	P61224		CCM2L	Q9NUG4		O00571		Q9BW04		P51587			O95274	O00571	Q5FWF5
	CCT7	Q99832		APCL_HUMAN	O95996		1B81_HUMAN	Q31610		RPGP1_HUMAN	P47736		CCNB1	P14635		P17844		Q8IVN8		P46736			P20645	P17844	Q16134
	CCT8	P50990		SCMC3_HUMAN	Q9BV35		1B73_HUMAN	Q31612		GDS1_HUMAN	P52306		CCNB2	O95067		Q16698		O15127		O95696			Q13477	Q16698	P14921
	CD101	Q93033		ANC2_HUMAN	Q9UJX6		1B38_HUMAN	Q95365		RAP2C_HUMAN	Q9Y3L5		CCNG1	P51959		O43583		Q6ZMJ2		P25440			Q9NR34	O43583	P41162
	CD109	Q6YHK3		SAMP_HUMAN	P02743		1C03_HUMAN	P04222		RPGF1_HUMAN	Q13905		CCNO	P22674		P17661		Q8NBX0		Q15059			Q9NTJ4	P17661	Q9UI08
	CD14	P08571		ACPH_HUMAN	P13798		1C07_HUMAN	P10321		RPGF2_HUMAN	Q9Y4G8		CCNT1	O60563		O43143		Q96I15		O60885			P55145	O43143	Q8TAG9
	CD151	P48509		APEX1_HUMAN	P27695		1C01_HUMAN	P30499		RPGF4_HUMAN	Q8WZA2		CCNT2	O60583		Q08211		Q8IWY4		Q9NPI1			P27338	Q08211	Q9Y3B2
	CD160	O95971		APH1A_HUMAN	Q96BI3		1C02_HUMAN	P30501		RPGF5_HUMAN	Q92565		CCP110	O43303		Q9NR28		Q9NQ36		Q9H0E9			Q16539	Q9NR28	Q13868
	CD163	Q86VB7		API5_HUMAN	Q9BZZ5		1C04_HUMAN	P30504		RPGF6_HUMAN	Q8TEU7		CCR10	P46092		O60610		Q8IX30		Q92994			P49006	O60610	Q9NPD3
	CD163L1	Q9NR16		APJ_HUMAN	P35414		1C08_HUMAN	P30505		RAPH1_HUMAN	Q70E73		CCS	O14618		O60832		Q6P3W7		Q9BX63			P56192	O60832	O00167
	CD177	Q8N6Q3		APLP1_HUMAN	P51693		1C12_HUMAN	P30508		RAPSN_HUMAN	Q13702		CCT2	P78371		Q9UBP4		Q7Z5N4		Q9P0J6			O00339	Q9UBP4	Q15910
	CD1C	P29017		APLP2_HUMAN	Q06481		1C14_HUMAN	P30510		RARA_HUMAN	P10276		CCT3	P49368		P09622		Q58EX2		Q5PSV4			Q7Z434	P09622	Q96RI0
	CD1D	P15813		APMAP_HUMAN	Q9HDC9		1C15_HUMAN	Q07000		RARB_HUMAN	P10826		CCT4	P50991		Q9UI17		Q96GA7		Q8IWQ3			Q96PE7	Q9UI17	P13726
	CD200R1	Q8TD46		APOA1_HUMAN	P02647		1C18_HUMAN	Q29865		RARG_HUMAN	P13631		CCT5	P48643		Q6E0U4		P61619		Q8WZ55			Q9ULC4	Q6E0U4	Q9UNN5
	CD209	Q9NNX6		APOA2_HUMAN	P02652		1C16_HUMAN	Q29960		TIG1_HUMAN	P49788		CCT6A	P40227		Q08495		Q9NS98		Q9BSF8			Q8NFP4	Q08495	Q9NZB2
	CD22	P20273		APOA4_HUMAN	P06727		1C06_HUMAN	Q29963		RARR2_HUMAN	Q99969		CCT7	Q99832		Q05193		Q9H3S1		Q9Y2F9			P21741	Q05193	O94988
	CD226	Q15762		APOA5_HUMAN	Q6Q788		1C17_HUMAN	Q95604		SYRC_HUMAN	P54136		CCT8	P50990		O00429		Q99719		Q96KE9			Q86V88	O00429	Q9NX38
	CD248	Q9HCU0		APOB_HUMAN	P04114		1C05_HUMAN	Q9TNN7		RASA1_HUMAN	P20936		CD109	Q6YHK3		P50570		Q8IW75		Q96Q07			O75095	P50570	Q9Y247
	CD27	P26842		ABC3F_HUMAN	Q8IUX4		DOA_HUMAN	P06340		RASA2_HUMAN	Q15283		CD14	P08571		Q9ULA0		Q8N474		P78543			Q9Y316	Q9ULA0	Q9BQN1
	CD276	Q5ZPR3		ABC3G_HUMAN	Q9HC16		DPA1_HUMAN	P20036		RASA3_HUMAN	Q14644		CD163	Q86VB7		Q99704		Q6FHJ7		Q14201			Q16820	Q99704	Q52LJ0
	CD2AP	Q9Y5K6		APOC1_HUMAN	P02654		DPB1_HUMAN	P04440		RASL2_HUMAN	O43374		CD22	P20273		Q9H4A9		Q5JXA9		Q9NY30			Q9NQ76	Q9H4A9	Q8IZU0
	CD300A	Q9UGN4		APOC2_HUMAN	P02655		DRA_HUMAN	P01903		RASL1_HUMAN	O95294		CD244	Q9BZW8		Q9NY33		Q9P270		Q13410			Q14696	Q9NY33	Q00597
	CD300LG	Q6UXG3		APOC3_HUMAN	P02656		2B1F_HUMAN	P01911		NGAP_HUMAN	Q9UJF2		CD27	P26842		P27487		Q9NQ25		Q8WVV5			Q9H8H3	P27487	Q9HB96
	CD320	Q9NPF0		APOC4_HUMAN	P55056		2B13_HUMAN	P01912		RHES_HUMAN	Q96D21		CD300A	Q9UGN4		Q9UHL4		Q6NUK1		O00481			Q08431	Q9UHL4	P48023
	CD33	P20138		APOD_HUMAN	P05090		2B11_HUMAN	P04229		RGF1A_HUMAN	Q8N9B8		CD33	P20138		Q16555		Q9ULF5		P78410			Q10469	Q16555	Q9NYQ8
	CD34	P28906		APOE_HUMAN	P02649		2B14_HUMAN	P13760		RGRF1_HUMAN	Q13972		CD36	P16671		Q08554		Q8WWI5		O00478			Q09327	Q08554	P35544
	CD36	P16671		APOF_HUMAN	Q13790		2B17_HUMAN	P13761		GRP2_HUMAN	Q7LDG7		CD3G	P09693		Q02487		Q8IWA5		Q9UIR0			Q09328	Q02487	O00757
	CD40	P25942		APOH_HUMAN	P02749		2B1B_HUMAN	P20039		GRP3_HUMAN	Q8IV61		CD44	P16070		Q14574		P0C7P3		Q6UX41			Q99685	Q14574	Q96IG2
	CD44	P16070		APOL1_HUMAN	O14791		2B1G_HUMAN	Q29974		GRP4_HUMAN	Q8TDF6		CD46	P15529		Q02413		Q9GZT3		Q6UXG8			P08493	Q02413	Q9UJT9
	CD46	P15529		APOL2_HUMAN	Q9BQE5		2B18_HUMAN	Q30134		RAIN_HUMAN	Q5U651		CD48	P09326		Q14126		B2RUZ4		O43683			O14880	Q14126	Q86XK2
	CD47	Q08722		APOL3_HUMAN	O95236		2B1A_HUMAN	Q30167		RSLAA_HUMAN	Q92737		CD55	P08174		P15924		Q9UHP9		O60566			Q8TDZ2	P15924	Q8NFZ0
	CD48	P09326		APOL4_HUMAN	Q9BPW4		2B1D_HUMAN	Q5Y7A7		RASLC_HUMAN	Q9NYN1		CD59	P13987		P60981		P52788		P41223			Q99542	P60981	Q9NVF7
	CD55	P08174		APOL5_HUMAN	Q9BWW9		2B1C_HUMAN	Q95IE3		RASF1_HUMAN	Q9NS23		CD5L	O43866		O95147		Q8TER0		Q8NE79			P41218	O95147	Q9UK99
	CD58	P19256		APOL6_HUMAN	Q9BWW8		2B1E_HUMAN	Q9GIY3		RASF2_HUMAN	P50749		CD63	P08962		P51452		O94875		Q13895			Q9Y3A3	P51452	Q7Z6M2
	CD59	P13987		APOM_HUMAN	O95445		2B19_HUMAN	Q9TQE0		RASF7_HUMAN	Q02833		CD68	P34810		Q14204		Q6UW49		Q9H2I8			Q13724	Q14204	Q9UH90
	CD5L	O43866		A4_HUMAN	P05067		HLAE_HUMAN	P13747		RASF8_HUMAN	Q8NHQ8		CD81	P60033		P63167		Q8WW59		Q96JN0			P34949	P63167	Q9UKB1
	CD6	P30203		APBP2_HUMAN	Q92624		HLAF_HUMAN	P30511		PRKRA_HUMAN	O75569		CD82	P27701		P42892		Q9BT56		Q8TAV5			Q00013	P42892	Q6X9E4
	CD74	P04233		APT_HUMAN	P07741		HLAG_HUMAN	P17693		RX_HUMAN	Q9Y2V3		CD9	P21926		P30084		P05455		Q6UW78			Q9UBG0	P30084	O75015
	CD81	P60033		APTX_HUMAN	Q7Z2E3		BPL1_HUMAN	P50747		RB_HUMAN	P06400		CD93	Q9NPY3		P42126		Q8WTU2		Q8IXR9			P08118	P42126	P16591
	CD84	Q9UIB8		AQP1_HUMAN	P29972		HLF_HUMAN	Q16534		RBBP4_HUMAN	Q09028		CD99	P14209		Q16610		Q96JF0		Q99622			Q9UJ68	Q16610	Q2WGJ9
	CD86	P42081		AQ12A_HUMAN	Q8IXF9		HLTF_HUMAN	Q14527		RBBP5_HUMAN	Q15291		CDA	P32320		O94769		O95630		Q5U649			P26927	O94769	Q9UHY8
	CD8A	P01732		AQP3_HUMAN	Q92482		HLX_HUMAN	Q14774		RBBP7_HUMAN	Q16576		CDAN1	Q8IWY9		Q05639		Q658P3		Q9UKR5			O14793	Q05639	P98174
	CD9	P21926		AQP4_HUMAN	P55087		HM13_HUMAN	Q8TCT9		CTIP_HUMAN	Q99708		CDC14A	Q9UNH5		P24534		Q8TCJ2		Q7Z3D6			Q86UE4	P24534	Q5JSP0
	CD93	Q9NPY3		AQP5_HUMAN	P55064		HEM3_HUMAN	P08397		RB8NL_HUMAN	Q8NC74		CDC20	Q12834		P29692		Q69YW2		Q0VAA2			P49914	P29692	Q9NP95
	CD96	P40200		AQP6_HUMAN	Q13520		HMCN1_HUMAN	Q96RW7		RBBP9_HUMAN	O75884		CDC25A	P30304		P26641		Q5T5C0		P56378			P55157	P26641	Q9GZV9
	CD97	P48960		AQP8_HUMAN	O94778		HM20B_HUMAN	Q9P0W2		HOIL1_HUMAN	Q9BYM8		CDC25B	P30305		P13639		Q9UBS9		Q9H972			P15941	P13639	P09769
	CD99	P14209		AQP7_HUMAN	O14520		HMGA2_HUMAN	P52926		RFOX1_HUMAN	Q9NWB1		CDC27	P30260		Q12805		P0DMM9		Q2M3C6			Q02817	Q12805	Q13451
	CD99L2	Q8TCZ2		AQP9_HUMAN	O43315		HMGB1_HUMAN	P09429		RFOX2_HUMAN	O43251		CDC42	P60953		O95967		Q6UWL2		O95177			Q14764	O95967	Q14318
	CDA	P32320		AQR_HUMAN	O60306		HMGB2_HUMAN	P26583		RBSK_HUMAN	Q9H477		CDC42EP1	Q00587		P98172		O60279		Q8IYS4			Q9NR99	P98172	Q96RU3
	CDC37	Q16543		ANDR_HUMAN	P10275		HMGB3_HUMAN	O15347		RBL1_HUMAN	P28749		CDC45	O75419		P52799		Q6ICL3		Q7Z2V1			Q96S97	P52799	Q9Y2H6
	CDC42	P60953		ARAF_HUMAN	P10398		HMGCL_HUMAN	P35914		RBL2_HUMAN	Q08999		CDC5L	Q99459		P01133		Q7L7X3		Q53F19			Q00872	P01133	Q04609
	CDC42BPB	Q9Y5S2		ARAP1_HUMAN	Q96P48		HMDH_HUMAN	P04035		RBM10_HUMAN	P98175		CDC6	Q99741		P00533		Q6P1N9		Q96DM3			P19105	P00533	P15407
	CDH1	P12830		COPD_HUMAN	P48444		HMCS1_HUMAN	Q01581		RBM11_HUMAN	P57052		CDC7	O00311		Q9H4M9		Q6NUS6		Q9GZP8			P24844	Q9H4M9	Q12948
	CDH11	P55287		AREG_HUMAN	P15514		HMCS2_HUMAN	P54868		RBM12_HUMAN	Q9NTZ6		CDH1	P12830		Q9NZN3		Q9NT68		Q9BQ61			Q96A32	Q9NZN3	Q9NU39
	CDH13	P55290		ARF3_HUMAN	P61204		HMGN1_HUMAN	P05114		RB12B_HUMAN	Q8IXT5		CDH12	P55289		Q9H223		P07204		Q13901			O00159	Q9H223	Q12951
	CDH15	P55291		ARF4_HUMAN	P18085		HMGN2_HUMAN	P05204		RBM14_HUMAN	Q96PK6		CDH13	P55290		P05198		Q9NS62		Q96EU7			P52179	P05198	Q9H334
	CDH17	Q12864		ARF5_HUMAN	P84085		HMGN3_HUMAN	Q15651		RBM15_HUMAN	Q96T37		CDH17	Q12864		P55884		Q9UPZ6		Q8NAX2			P54296	P55884	O14772
	CDH19	Q9H159		ARF6_HUMAN	P62330		HMGN4_HUMAN	O00479		SPF45_HUMAN	Q96I25		CDH2	P19022		O75821		Q3ZCQ8		Q8N715			Q8WU39	O75821	P42685
	CDH2	P19022		ARFG1_HUMAN	Q8N6T3		HMGN5_HUMAN	P82970		RBM19_HUMAN	Q9Y4C8		CDH26	Q8IXH8		O75822		Q9GZM7		Q8N0U7			Q9UJ70	O75822	P51114
	CDH23	Q9H251		ARFG3_HUMAN	Q9NP61		HMGX3_HUMAN	Q12766		RBM23_HUMAN	Q86U06		CDH5	P33151		P60842		O75663		Q9BXJ5			Q9NR45	P60842	Q96DB9
	CDH5	P33151		BIG1_HUMAN	Q9Y6D6		HMGX4_HUMAN	Q9UGU5		RBM25_HUMAN	P49756		CDH6	P55285		Q14240		Q6PL24		Q9BXJ3			Q6XQN6	Q14240	Q9UP38
	CDH6	P55285		BIG2_HUMAN	Q9Y6D5		HMHA1_HUMAN	Q92619		RBM26_HUMAN	Q5T8P6		CDHR2	Q9BYE9		P38919		Q9BVK6		Q9BXI9			P41271	P38919	Q9H461
	CDHR2	Q9BYE9		ARFP1_HUMAN	P53367		HMMR_HUMAN	O75330		RBM27_HUMAN	Q9P2N5		CDHR5	Q9HBB8		P06730		Q24JP5		P60827			Q6ZVX7	P06730	Q9UBS5
	CDHR5	Q9HBB8		ARFP2_HUMAN	P53365		HMOX1_HUMAN	P09601		RBM28_HUMAN	Q9NW13		CDK1	P06493		Q04637		Q8N3T6		Q96MY1			Q9Y2A7	Q04637	O95257
	CDON	Q4KMG0		ARFRP_HUMAN	Q13795		HMOX2_HUMAN	P30519		RBM3_HUMAN	P98179		CDK2	P24941		P78344		Q14C87		Q9BQM9			Q9NZQ3	P78344	P22466
	CDS2	O95674		ARGI1_HUMAN	P05089		JUPI1_HUMAN	Q9UK76		RBM34_HUMAN	P42696		CDK4	P11802		Q15056		Q6IEE7		Q9BUV8			Q92542	Q15056	O43603
	CDSN	Q15517		ARGI2_HUMAN	P78540		CRML_HUMAN	Q96RY5		RBM38_HUMAN	Q9H0Z9		CDK5	Q00535		O60841		Q9UHN6		Q8NHU2			Q9UN36	O60841	Q9H2C0
	CDV3	Q9UKY7		RHG01_HUMAN	Q07960		JUPI2_HUMAN	Q9H910		RBM39_HUMAN	Q14498		CDK5RAP2	Q96SN8		P56537		Q9NWD8		Q9NUD7			P52848	P56537	P17677
	CEACAM1	P13688		RHG10_HUMAN	A1A4S6		HNF1A_HUMAN	P20823		RBM45_HUMAN	Q8IUH3		CDK5RAP3	Q96JB5		P08246		Q86YD3		O43822			P52849	P08246	O14556
	CEACAM5	P06731		RHG12_HUMAN	Q8IWW6		HNF1B_HUMAN	P35680		RBM5_HUMAN	P52756		CDK6	Q00534		Q15717		Q8WWA1		P58505			O95299	Q15717	Q9NY12
	CEACAM6	P40199		RHG17_HUMAN	Q68EM7		HNF4A_HUMAN	P41235		RBM6_HUMAN	P78332		CDK7	P50613		P15502		Q8N4L2		P57076			Q16718	P15502	Q99501
	CEACAM8	P31997		RHG18_HUMAN	Q8N392		HNF4G_HUMAN	Q14541		RBM7_HUMAN	Q9Y580		CDK8	P49336		Q15369		O94886		Q9NYK6			P28331	Q15369	O95995
	CECR1	Q9NZK5		RHG21_HUMAN	Q5T5U3		ROA0_HUMAN	Q13151		RBM8A_HUMAN	Q9Y5S9		CDK9	P50750		Q9BXX0		Q9H3N1		O14523			O75306	Q9BXX0	P23771
	CEL	P19835		RHG24_HUMAN	Q8N264		ROA1_HUMAN	P09651		RBMS2_HUMAN	Q15434		CDKL5	O76039		O94919		O95379		Q9H1Z8			P19404	O94919	Q86YP4
	CEMIP	Q8WUJ3		RHG25_HUMAN	P42331		ROA2_HUMAN	P22626		RBMX_HUMAN	P38159		CDKN2A	P42771		P17813		P02585		Q9BVC5			Q9NQS3	P17813	Q8WXI9
	CERS2	Q96G23		RHG26_HUMAN	Q9UNA1		ROA3_HUMAN	P51991		RBMX2_HUMAN	Q9Y388		CDKN2C	P42773		P06733		P48788		Q96LR7			Q96NY8	P06733	Q92538
	CES1	P23141		RHG29_HUMAN	Q52LW3		ROAA_HUMAN	Q99729		RBY1A_HUMAN	P0DJD3		CDS2	O95674		P09104		Q92752		Q16581			Q8TDX7	P09104	P32455
	CES2	O00748		RHG33_HUMAN	O14559		HNRPC_HUMAN	P07910		RIMB1_HUMAN	O95153		CDV3	Q9UKY7		P13929		Q6ZVM7		Q8ND61			Q92832	P13929	Q96PP9
	CES3	Q6UWW8		RHG35_HUMAN	Q9NRY4		HNRC1_HUMAN	O60812		RET1_HUMAN	P09455		CEACAM1	P13688		Q07075		Q8NFQ8		O15544			Q99519	Q07075	O75600
	CETP	P11597		RHG39_HUMAN	Q9C0H5		HNRPD_HUMAN	Q14103		ARI4A_HUMAN	P29374		CEACAM5	P06731		Q13822		Q9NXH8		Q96FZ2			Q9Y3R4	Q13822	Q8IWJ2
	CFB	P00751		RHG04_HUMAN	P98171		HNRDL_HUMAN	O14979		KDM5A_HUMAN	P29375		CEACAM8	P31997		O43768		Q13641		Q8NDZ4			Q0ZGT2	O43768	P47871
	CFD	P00746		RHG44_HUMAN	Q17R89		HNRPF_HUMAN	P52597		RET2_HUMAN	P50120		CECR1	Q9NZK5		O75356		P51580		A6NLC5			P08138	O75356	Q12851
	CFH	P08603		RHG05_HUMAN	Q13017		HNRH1_HUMAN	P31943		RET3_HUMAN	P10745		CELF1	Q92879		P11171		P20231		Q86YA3			Q9UFN0	P11171	P55107
	CFHR1	Q03591		RHG06_HUMAN	O43182		HNRH2_HUMAN	P55795		RET4_HUMAN	P02753		CELSR3	Q9NYQ7		O43491		A6NFA1		Q0P651			Q86X76	O43491	P43026
	CFHR2	P36980		RHG09_HUMAN	Q9BRR9		HNRH3_HUMAN	P31942		RABP1_HUMAN	P29762		CEMIP	Q8WUJ3		Q9Y2J2		Q8NG06		Q96KX1			Q9Y3T9	Q9Y2J2	P57678
	CFHR3	Q02985		GDIR1_HUMAN	P52565		HNRPK_HUMAN	P61978		RET5_HUMAN	P82980		CENPE	Q02224		P16452		Q8TD43		P21730			Q99466	P16452	O95749
	CFHR4	Q92496		GDIR2_HUMAN	P52566		HNRPL_HUMAN	P14866		RET7_HUMAN	Q96R05		CENPF	P49454		P16422		Q99598		Q9P296			O15118	P16422	Q8N2G8
	CFHR5	Q9BXR6		GDIR3_HUMAN	Q99819		HNRLL_HUMAN	Q8WVV9		SUH_HUMAN	Q06330		CEP104	O60308		P21709		Q8NG11		Q5SRN2			Q9NQX5	P21709	P09681
	CFI	P05156		ARHG1_HUMAN	Q92888		HNRPM_HUMAN	P52272		RBPMS_HUMAN	Q93062		CEP131	Q9UPN4		P54764		Q96QS1		Q5T5N4			Q8NDH3	P54764	Q14161
	CFL1	P23528		ARHGA_HUMAN	O15013		HNRPR_HUMAN	O43390		RBX1_HUMAN	P62877		CEP135	Q66GS9		Q15375		Q86UF1		Q8IYR0			P06748	Q15375	Q14410
	CFL2	Q9Y281		ARHGB_HUMAN	O15085		HNRPU_HUMAN	Q00839		RCAN2_HUMAN	Q14206		CEP152	O94986		P29323		O75954		Q9UBA6			Q15818	P29323	Q96IK5
	CFP	P27918		ARHGC_HUMAN	Q9NZN5		HNRL1_HUMAN	Q9BUJ2		RCAN3_HUMAN	Q9UKA8		CEP162	Q5TB80		P54760		Q16762		Q9GZU0			P47972	P54760	Q9Y692
	CGN	Q9P2M7		ARHGF_HUMAN	O94989		HOME1_HUMAN	Q86YM7		RCC1_HUMAN	P18754		CEP250	Q9BV73		P34913		Q6P3X3		Q6UWU4			P15559	P34913	P49915
	CGREF1	Q99674		ARHG2_HUMAN	Q92974		HOME2_HUMAN	Q9NSB8		RCC2_HUMAN	Q9P258		CEP350	Q5VT06		Q9Y6I3		A6NLP5		Q9BPX7			P01111	Q9Y6I3	P30679
	CHAD	O15335		ARHG3_HUMAN	Q9NR81		HOME3_HUMAN	Q9NSC5		FACE2_HUMAN	Q9Y256		CEP57	Q86XR8		P07814		Q5R3I4		Q8N3F0			Q92686	P07814	P16520
	CHCHD3	Q9NX63		ARHG4_HUMAN	Q9NR80		HOMEZ_HUMAN	Q8IX15		ZN363_HUMAN	Q96PM5		CEP70	Q8NHQ1		P42566		Q86TV6		Q8WVR3			Q9ULB1	P42566	Q92805
	CHGA	P10645		ARHG5_HUMAN	Q12774		HOOK1_HUMAN	Q9UJC3		RCL1_HUMAN	Q9Y2P8		CES1	P23141		Q9UBC2		Q9GZX9		Q9BUW7			Q9Y4C0	Q9UBC2	Q13439
	CHGB	P05060		ARHG6_HUMAN	Q15052		HOOK2_HUMAN	Q96ED9		RCN1_HUMAN	Q15293		CETP	P11597		Q9NZ08		Q99757		Q9NS85			Q15738	Q9NZ08	Q99795
	CHI3L1	P36222		ARHG7_HUMAN	Q14155		HOOK3_HUMAN	Q86VS8		RCN3_HUMAN	Q96D15		CFB	P00751		P04626		Q9GZZ9		O75493			P46459	P04626	O95872
	CHI3L2	Q15782		ARI1A_HUMAN	O14497		HOP_HUMAN	Q9BPY8		RCOR1_HUMAN	Q9UKL0		CFD	P00746		P21860		A0AVT1		P35218			Q08J23	P21860	Q9NW75
	CHID1	Q9BWS9		ARI1B_HUMAN	Q8NFD5		HXA1_HUMAN	P49639		RCOR3_HUMAN	Q9P2K3		CFH	P08603		Q15303		Q9BSL1		Q8WTZ4			Q5TFE4	Q15303	Q9UKJ3
	CHIT1	Q13231		ARID2_HUMAN	Q68CP9		HXA10_HUMAN	P31260		RECO_HUMAN	P35243		CFHR1	Q03591		Q96HE7		Q8TF42		Q9Y2D0			P21589	Q96HE7	Q8IZF6
	CHL1	O00533		ARI3A_HUMAN	Q99856		HXA11_HUMAN	P31270		RDH11_HUMAN	Q8TC12		CFHR2	P36980		P30040		Q9C0C9		P43166			O95631	P30040	Q8IZF5
	CHMP2A	O43633		ARI4A_HUMAN	P29374		HXA13_HUMAN	P31271		RDH12_HUMAN	Q96NR8		CFHR3	Q02985		Q9BS26		O94874		Q16790			P04629	Q9BS26	Q13585
	CHMP4A	Q9BY43		ARI4B_HUMAN	Q4LE39		HXA2_HUMAN	O43364		RDH13_HUMAN	Q8NBN7		CFHR4	Q92496		Q96AP7		Q16851		Q9BTV7			P30990	Q96AP7	Q9NYM4
	CHMP4B	Q9H444		ARI5B_HUMAN	Q14865		HXA3_HUMAN	O43365		RDH14_HUMAN	Q9HBH5		CFHR5	Q9BXR6		P10768		Q96K76		Q9NZU7			P80303	P10768	Q86Y34
	CHMP6	Q96FZ7		ARI1_HUMAN	Q9Y4X5		HXA4_HUMAN	Q00056		RDH16_HUMAN	O75452		CFI	P05156		A0FGR8		Q8NBZ7		Q9NPB3			P50583	A0FGR8	Q96CP6
	CHORDC1	Q9UHD1		ARI2_HUMAN	O95376		HXA5_HUMAN	P20719		RDH1_HUMAN	Q92781		CFL1	P23528		P62495		O95183		P57796			Q9BW91	P62495	Q13588
	CHRD	Q9H2X0		ARL1_HUMAN	P40616		HXA7_HUMAN	P31268		RADI_HUMAN	P35241		CFL2	Q9Y281		P13804		P51809		Q9NP86			Q8TEM1	P13804	P42261
	CHRDL1	Q9BU40		ARL16_HUMAN	Q0P5N6		HXA9_HUMAN	P31269		REC8_HUMAN	O95072		CFP	P27918		P38117		Q9BV40		Q96KC9			Q9Y6K5	P38117	Q13003
	CHRDL2	Q6WN34		ARL2_HUMAN	P36404		HXB1_HUMAN	P14653		RECK_HUMAN	O95980		CFTR	P13569		Q01844		P49767		Q13936			Q9NZT2	Q01844	Q05586
	CHST10	O43529		ARL3_HUMAN	P36405		HXB13_HUMAN	Q92826		RECQ1_HUMAN	P46063		CGA	P01215		Q96A65		Q6UXI7		Q15878			Q9NRN5	Q96A65	Q12879
	CHST11	Q9NPF2		ARL4A_HUMAN	P40617		HXB2_HUMAN	P14652		RECQ4_HUMAN	O94761		CGN	Q9P2M7		Q93063		Q4G0F5		O95180			Q99983	Q93063	Q14957
	CHST12	Q9NRB3		ARL4C_HUMAN	P56559		HXB3_HUMAN	P14651		RECQ5_HUMAN	O94762		CGREF1	Q99674		Q9UBQ6		Q5VU13		Q13698			Q99935	Q9UBQ6	Q15835
	CHST15	Q7LFX5		ARL4D_HUMAN	P49703		HXB4_HUMAN	P17483		REEP5_HUMAN	Q00765		CHAD	O15335		P15311		Q6PCB0		Q7Z3S7			P22059	P15311	Q13255
	CHST3	Q7LGC8		ARL5A_HUMAN	Q9Y689		HXB6_HUMAN	P17509		REG1A_HUMAN	P05451		CHAF1B	Q13112		P00742		Q96DN2		Q02641			Q8IYS5	P00742	P08263
	CIAPIN1	Q6FI81		ARL5B_HUMAN	Q96KC2		HXB7_HUMAN	P09629		REG3A_HUMAN	Q06141		CHD2	O14647		P03951		P42768		Q08289			Q92882	P03951	P09488
	CILP	O75339		ARL6_HUMAN	Q9H0F7		HXB9_HUMAN	P17482		REL_HUMAN	Q04864		CHD3	Q12873		Q9Y624		Q8TEU8		P54284			Q7RTW8	Q9Y624	Q00403
	CILP2	Q8IUL8		AR6P1_HUMAN	Q15041		HXC10_HUMAN	Q9NYD6		RELB_HUMAN	Q01201		CHD4	Q14839		P00748		Q5T750		Q9Y698			P55809	P00748	P29083
	CIRBP	Q14011		ARL8A_HUMAN	Q96BM9		HXC11_HUMAN	O43248		RELN_HUMAN	P78509		CHD6	Q8TD26		P00488		Q8NBI6		O60359			P51575	P00488	P35269
	CISD2	Q8N5K1		ARMC2_HUMAN	Q8NEN0		HXC12_HUMAN	P31275		TR19L_HUMAN	Q969Z4		CHD7	Q9P2D1		P05160		Q86Y38		Q9UBN1			Q9UNF0	P05160	P78347
	CKAP4	Q07065		ARMX3_HUMAN	Q9UH62		HXC13_HUMAN	P31276		REM1_HUMAN	O75628		CHD8	Q9HCK8		P00734		O15498		Q9UF02			Q15102	P00734	Q9NYZ3
	CKAP5	Q14008		ARNT_HUMAN	P27540		HXC4_HUMAN	P09017		REM2_HUMAN	Q8IYK8		CHD9	Q3L8U1		P12259		Q5VVQ6		Q9BXT2			Q9H074	P12259	P51841
	CKB	P12277		ARNT2_HUMAN	Q9HBZ2		HXC6_HUMAN	P09630		RENI_HUMAN	P00797		CHEK1	O14757		P08709		Q8IWT0		Q8WXS5			P61457	P08709	Q9UBP9
	CKM	P06732		BMAL1_HUMAN	O00327		HXC9_HUMAN	P31274		KCD11_HUMAN	Q693B1		CHEK2	O96017		P00451		O60844		O76075			O14917	P00451	P10144
	CKMT1B	P12532		ARC1A_HUMAN	Q92747		HXD1_HUMAN	Q9GZZ0		RENBP_HUMAN	P51606		CHFR	Q96EP1		P00740		O75844		P05937			Q9HCL0	P00740	P51124
	CKMT2	P17540		ARC1B_HUMAN	O15143		HXD10_HUMAN	P28358		REPS1_HUMAN	Q96D71		CHGA	P10645		P07148				P01258			P35558	P07148	P07305
	CLC	Q05315		ARPC2_HUMAN	O15144		HXD11_HUMAN	P31277		REPS2_HUMAN	Q8NFH8		CHGB	P05060		P12104				P30988			Q9UHG2	P12104	Q92522
	CLCA1	A8K7I4		ARPC3_HUMAN	O15145		HXD12_HUMAN	P35452		RERE_HUMAN	Q9P2R6		CHI3L1	P36222		P05413				Q9BXU9			P29122	P05413	Q9BTM1
	CLCA2	Q9UQC9		ARPC4_HUMAN	P59998		HXD13_HUMAN	P35453		REST_HUMAN	Q13127		CHI3L2	Q15782		P15090				Q9NYX4			Q16549	P15090	P16104
	CLCA4	Q14CN2		ARPC5_HUMAN	O15511		HXD4_HUMAN	P09016		RET_HUMAN	P07949		CHIT1	Q13231		Q01469				Q16566			O76074	Q01469	P0C0S5
	CLDN3	O15551		ARP19_HUMAN	P56211		HXD9_HUMAN	P28356		RETN_HUMAN	Q9HD89		CHKB	Q9Y259		P16930				Q8N5S9			P08559	P16930	Q99871
	CLDN5	O00501		ARP21_HUMAN	Q9UBL0		HPT_HUMAN	P00738		REV1_HUMAN	Q9UBZ9		CHL1	O00533		Q96TA1				Q96RR4			P11177	Q96TA1	P02100
	CLEC11A	Q9Y240		ARRC_HUMAN	P36575		HP1B3_HUMAN	Q5SSJ5		REV3L_HUMAN	O60673		CHMP5	Q9NZZ3		Q8IXL6				P49069			Q14554	Q8IXL6	P69892
	CLEC14A	Q86T13		ARRB1_HUMAN	P49407		HPCA_HUMAN	P84074		GOR_HUMAN	Q8IX06		CHN1	P15882		Q92520				Q96JM3			Q9NR12	Q92520	P51610
	CLEC1B	Q9P126		ARRB2_HUMAN	P32121		HPCL1_HUMAN	P37235		ORN_HUMAN	Q9Y3B8		CHN2	P52757		Q12884				Q5T5Y3			Q96GD0	Q12884	O60741
	CLEC3B	P05452		ARSA_HUMAN	P15289		HPCL4_HUMAN	Q9UM19		RFC1_HUMAN	P35251		CHP1	Q99653		P49327				Q9Y6Y1			P16284	P49327	Q9P1Z3
	CLEC4M	Q9H2X3		ARSB_HUMAN	P15848		HPPD_HUMAN	P32754		S19A1_HUMAN	P41440		CHRD	Q9H2X0		P22087				Q13114			O60925	P22087	Q13547
	CLIC1	O00299		ARSD_HUMAN	P51689		PGDH_HUMAN	P15428		RFC2_HUMAN	P35250		CHTOP	Q9Y3Y2		P23142				P40123			P08237	P23142	Q92769
	CLIC2	O15247		ARSF_HUMAN	P54793		HEPS_HUMAN	P05981		RFC3_HUMAN	P40938		CIITA	P33076		P98095				Q9BPX3			Q96G03	P98095	Q8WUI4
	CLIC4	Q9Y696		ARSK_HUMAN	Q6UWY0		HPTR_HUMAN	P00739		RFC4_HUMAN	P35249		CIRBP	Q14011		Q9UBX5				Q9HC96			O95394	Q9UBX5	Q9UKV0
	CLIC5	Q9NZA1		NAR1_HUMAN	P52961		HPRT_HUMAN	P00492		RFC5_HUMAN	P40937		CITED2	Q99967		P35555				Q9UMQ6			Q15124	P35555	Q00341
	CLINT1	Q14677		NAR3_HUMAN	Q13508		HPS1_HUMAN	Q92902		RFNG_HUMAN	Q9Y644		CIZ1	Q9ULV3		P35556				Q6ZSI9			O00264	P35556	Q86Y56
	CLIP1	P30622		NAR4_HUMAN	Q93070		HPS3_HUMAN	Q969F9		RFPL2_HUMAN	O75678		CKAP5	Q14008		P09467				P20807			Q13492	P09467	Q7Z4Q2
	CLIP2	Q9UDT6		NOB1_HUMAN	Q9ULX3		HPS4_HUMAN	Q9NQG7		RFPL3_HUMAN	O75679		CKB	P12277		P12318				O15484			Q13526	P12318	Q9P2P5
	CLMP	Q9H6B4		NAR5_HUMAN	Q96L15		HPS5_HUMAN	Q9UPZ3		RFTN1_HUMAN	Q14699		CKM	P06732		P08637				Q9Y6Q1			Q00169	P08637	P42694
	CLN5	O75503		ARVC_HUMAN	O00192		HPS6_HUMAN	Q86YV9		RFWD2_HUMAN	Q8NHY2		CKMT2	P17540		O00602				Q9Y6W3			P48739	O00602	Q9BYK8
	CLPS	P04118		ARX_HUMAN	Q96QS3		HPSE_HUMAN	Q9Y251		RFWD3_HUMAN	Q6PCD5		CLCN2	P51788		Q15485				O14815			Q8NCC3	Q15485	Q5GLZ8
	CLSTN1	O94985		AS3MT_HUMAN	Q9HBK9		HEMO_HUMAN	P02790		RFX1_HUMAN	P22670		CLCN5	P51795		O75636				Q96L46			P04054	O75636	Q15011
	CLSTN2	Q9H4D0		ASAH1_HUMAN	Q13510		HAIR_HUMAN	O43593		RFX2_HUMAN	P48378		CLCN6	P51797		P14324				Q6IMN6			P47712	P14324	Q14469
	CLSTN3	Q9BQT9		ASAP1_HUMAN	Q9ULH1		RASH_HUMAN	P01112		RFX5_HUMAN	P48382		CLEC11A	Q9Y240		P39748				Q13938			Q8NHP8	P39748	P14210
	CLTA	P09496		ASAP2_HUMAN	O43150		HRSL2_HUMAN	Q9NWW9		RFXK_HUMAN	O14593		CLEC3B	P05452		Q86UX7				Q86UW7			Q00722	Q86UX7	Q16665
	CLTB	P09497		ASAP3_HUMAN	Q8TDY4		HRSL5_HUMAN	Q96KN8		RFXAP_HUMAN	O00287		CLIC1	O00299		Q9UGM5				Q9BXY5			Q01970	Q9UGM5	Q86Z02
	CLTC	Q00610		ASB1_HUMAN	Q9Y576		SRCH_HUMAN	P23327		RGL1_HUMAN	Q9NZL6		CLIC3	O95833		P02671				Q96KX2			Q96BZ4	P02671	Q9H2X6
	CLTCL1	P53675		ASB10_HUMAN	Q8WXI3		HRG_HUMAN	P04196		RGL2_HUMAN	O15211		CLINT1	Q14677		P02675				Q9BXL7			O60568	P02675	Q96QV6
	CLU	P10909		ASB11_HUMAN	Q8WXH4		HRH3_HUMAN	Q9Y5N1		RGMA_HUMAN	Q96B86		CLIP1	P30622		Q9BYJ0				Q9BXL6			Q14651	Q9BYJ0	P62807
	CLYBL	Q8N0X4		ASB12_HUMAN	Q8WXK4		HRH4_HUMAN	Q9H3N8		RGMB_HUMAN	Q6NW40		CLIP2	Q9UDT6		P11362				Q5EG05			Q8IUK5	P11362	Q99880
	CMBL	Q96DG6		ASB13_HUMAN	Q8WXK3		HORN_HUMAN	Q86YZ3		RGN_HUMAN	Q15493		CLMN	Q96JQ2		P21802				Q5XLA6			Q6UX71	P21802	Q7L7L0
	CMIP	Q8IY22		ASB15_HUMAN	Q8WXK1		RIDA_HUMAN	P52758		RGPD1_HUMAN	P0DJD0		CLPB	Q9H078		P22455				P57730			Q9UIW2	P22455	P31629
	CMPK1	P30085		ASB16_HUMAN	Q96NS5		HS3S1_HUMAN	O14792		RGP1_HUMAN	Q92546		CLPS	P04118		P02679				Q9H257			P40967	P02679	P52789
	CMTM6	Q9NX76		ASB17_HUMAN	Q8WXJ9		HS3SA_HUMAN	Q9Y663		RGR_HUMAN	P47804		CLSTN1	O94985		Q08830				Q86X55			Q10713	Q08830	P04439
	CNBP	P62633		ASB2_HUMAN	Q96Q27		HS3S5_HUMAN	Q8IZT8		RGDSR_HUMAN	Q8IZJ4		CLSTN3	Q9BQT9		Q14314				Q9HA77			O75439	Q14314	P13746
	CNDP1	Q96KN2		ASB3_HUMAN	Q9Y575		HS3S6_HUMAN	Q96QI5		RGS10_HUMAN	O43665		CLTA	P09496		P07954				Q16568			P54315	P07954	P16188
	CNDP2	Q96KP4		ASB4_HUMAN	Q9Y574		HSBP1_HUMAN	O75506		RGS11_HUMAN	O94810		CLTB	P09497		Q13642				O15234			P54317	Q13642	P10321
	CNN2	Q99439		ASB5_HUMAN	Q8WWX0		DHI1_HUMAN	P28845		RGS12_HUMAN	O14924		CLTC	Q00610		Q9Y613				O14936			Q9NVS9	Q9Y613	P06340
	CNN3	Q15417		ASB6_HUMAN	Q9NWX5		DHI2_HUMAN	P80365		RGS14_HUMAN	O43566		CLTCL1	P53675		Q9Y3D6				P07498			Q8WVV4	Q9Y3D6	P01911
	CNOT1	A5YKK6		ASB8_HUMAN	Q9H765		DHB1_HUMAN	P14061		RGS16_HUMAN	O15492		CLU	P10909		P62942				Q8WXE0			Q9H488	P62942	P04229
	CNP	P09543		ASB9_HUMAN	Q96DX5		HCD2_HUMAN	Q99714		RGS18_HUMAN	Q9NS28		CMA1	P23946		Q00688				P29466			Q15165	Q00688	Q29974
	CNPY2	Q9Y2B0		ASCC1_HUMAN	Q8N9N2		DHB2_HUMAN	P37059		RGS2_HUMAN	P41220		CMAS	Q8NFW8		Q02790				Q92851			Q15181	Q02790	Q9GIY3
	CNPY3	Q9BT09		ASCC3_HUMAN	Q8N3C0		DHB3_HUMAN	P37058		RGS20_HUMAN	O76081		CMPK1	P30085		O95302				P49662			Q9HAB8	O95302	Q8TCT9
	CNRIP1	Q96F85		ASCL2_HUMAN	Q99929		DHB4_HUMAN	P51659		RGS3_HUMAN	P49796		CNBP	P62633		P20930				P55212			P45877	P20930	P52926
	CNST	Q6PJW8		ASGR2_HUMAN	P07307		DHB7_HUMAN	P56937		RGS4_HUMAN	P49798		CNDP1	Q96KN2		Q5D862				P55210			P35813	Q5D862	O15347
	CNTFR	P26992		ASH1L_HUMAN	Q9NR48		DHB8_HUMAN	Q92506		RGS5_HUMAN	O15539		CNDP2	Q96KP4		Q13045				Q14790			Q9Y570	Q13045	P04035
	CNTN1	Q12860		ASH2L_HUMAN	Q9UBL3		3BHS1_HUMAN	P14060		RGS6_HUMAN	P49758		CNGB1	Q14028		P21333				Q9UKL3			O14974	P21333	Q12766
	CNTN2	Q02246		ASIC1_HUMAN	P78348		3BHS2_HUMAN	P26439		RGS7_HUMAN	P49802		CNMD	O75829		O75369				P55211			Q15435	O75369	Q9UK76
	CNTN3	Q9P232		ASIC2_HUMAN	Q16515		3BHS7_HUMAN	Q9H2F3		RGS9_HUMAN	O75916		CNN2	Q99439		Q14315				P31415			Q15172	Q14315	Q00056
	CNTN4	Q8IWV2		ARLY_HUMAN	P04424		HSDL2_HUMAN	Q6YN16		RHAG_HUMAN	Q02094		CNN3	Q15417		O75955				O15446			P63098	O75955	P31269
	CNTN5	O94779		ASMT_HUMAN	P46597		HSF1_HUMAN	Q00613		RHBL1_HUMAN	O75783		CNOT1	A5YKK6		Q14254				Q86V15			P53041	Q14254	P14651
	CNTN6	Q9UQ52		ASML_HUMAN	O95671		HSF2_HUMAN	Q03933		RHBL2_HUMAN	Q9NX52		CNOT8	Q9UFF9		P17948				Q6IB77			P50897	P17948	O43248
	CNTNAP4	Q9C0A0		ASNA_HUMAN	O43681		HSF2B_HUMAN	O75031		RHBL3_HUMAN	P58872		CNP	P09543		P35916				Q9H7T0			Q13162	P35916	P31275
	COASY	Q13057		ASNS_HUMAN	P08243		HSF4_HUMAN	Q9ULV5		RHCE_HUMAN	P18577		CNPY2	Q9Y2B0		P02751				Q03135			Q9HCU5	P02751	P84074
	COCH	O43405		ACY2_HUMAN	P45381		HSFY1_HUMAN	Q96LI6		RHD_HUMAN	Q02161		CNTF	P26441		Q9H479				P51636			P14222	Q9H479	Q9UPZ3
	COL10A1	Q03692		ASPH_HUMAN	Q12797		HS90A_HUMAN	P07900		RHEB_HUMAN	Q15382		CNTFR	P26992		Q9HA64				O43439			P17612	Q9HA64	P01112
	COL11A1	P12107		ASPM_HUMAN	Q8IZT6		HS90B_HUMAN	P08238		OPSD_HUMAN	P08100		CNTN1	Q12860		Q9Y2L6				Q13951			P54619	Q9Y2L6	Q8IZT8
	COL11A2	P13942		ASPN_HUMAN	Q9BXN1		ENPL_HUMAN	P14625		RHOB_HUMAN	P62745		CNTN2	Q02246		Q16658				P22681			Q05655	Q16658	P37059
	COL12A1	Q99715		APRV1_HUMAN	Q53RT3		HS12A_HUMAN	O43301		RHBT2_HUMAN	Q9BYZ6		CNTN3	Q9P232		P19883				Q13191			P60891	P19883	Q6YN16
	COL14A1	Q05707		ASPC1_HUMAN	Q9BZE9		HS12B_HUMAN	Q96MM6		RHBT3_HUMAN	O94955		CNTN4	Q8IWV2		Q12841				Q9ULV8			Q5FWE3	Q12841	Q00613
	COL15A1	P39059		ASSY_HUMAN	P00966		HSP13_HUMAN	P48723		RHOC_HUMAN	P08134		CNTN5	O94779		P02794				Q6UW01			Q16651	P02794	Q03933
	COL16A1	Q07092		ASTE1_HUMAN	Q2TB18		HS71A_HUMAN	P0DMV8		RHOD_HUMAN	O00212		CNTNAP2	Q9UHC6		P02792				O75828			P25786	P02792	Q9ULV5
	COL18A1	P39060		ASTN1_HUMAN	O14525		HS71B_HUMAN	P0DMV9		RHOF_HUMAN	Q9HBH0		CNTRL	Q7Z7A1		Q96AE4				O00257			P62191	Q96AE4	Q96MM6
	COL1A1	P02452		ASXL1_HUMAN	Q8IXJ9		HS71L_HUMAN	P34931		RHOG_HUMAN	P84095		COCH	O43405		P04066				O95503			P35998	P04066	O95757
	COL1A2	P08123		ATD2B_HUMAN	Q9ULI0		HSP72_HUMAN	P54652		RHOQ_HUMAN	P17081		COG2	Q14746		Q9BTY2				O95931			P62333	Q9BTY2	P17066
	COL21A1	Q96P44		ATCAY_HUMAN	Q86WG3		HSP74_HUMAN	P34932		MIRO2_HUMAN	Q8IXI1		COG5	Q9UP83		P09958				Q9HC52			O75832	P09958	P28566
	COL24A1	Q17RW2		ATE1_HUMAN	O95260		HS74L_HUMAN	O95757		RHXF1_HUMAN	Q8NHV9		COG8	Q96MW5		P35637				Q9Y3M2			O00232	P35637	O43464
	COL3A1	P02461		ATF2_HUMAN	P15336		GRP78_HUMAN	P11021		RHXF2_HUMAN	Q9BQY4		COL11A1	P12107		P06241				Q6P1N0			Q9UNM6	P06241	P42858
	COL4A1	P02462		ATF3_HUMAN	P18847		HSP76_HUMAN	P17066		RHPN1_HUMAN	Q8TCX5		COL11A2	P13942		Q13283				Q8IX12			O43242	Q13283	P41252
	COL4A2	P08572		ATF4_HUMAN	P18848		HSP7C_HUMAN	P11142		RHPN2_HUMAN	Q8IUC4		COL12A1	Q99715		P11413				Q6YP21			P55036	P11413	O60725
	COL5A1	P20908		ATF6A_HUMAN	P18850		GRP75_HUMAN	P38646		RIC8A_HUMAN	Q9NPQ8		COL14A1	Q05707		P10253				Q9H0I3			P51665	P10253	P41134
	COL5A2	P05997		ATF6B_HUMAN	Q99941		HSPB1_HUMAN	P04792		RIMB2_HUMAN	O15034		COL15A1	P39059		P54803				Q8IYX3			Q9UL46	P54803	O43837
	COL5A3	P25940		ATF7_HUMAN	P17544		HSPB3_HUMAN	Q12988		RIMKB_HUMAN	Q9ULI2		COL17A1	Q9UMD9		P51570				Q6ZUS5			P61289	P51570	P51553
	COL6A1	P12109		MCAF1_HUMAN	Q6VMQ6		HSPB6_HUMAN	O14558		RIMS1_HUMAN	Q86UR5		COL18A1	P39060		Q10472				Q8IYE1			Q92530	Q10472	Q16666
	COL6A2	P12110		MCAF2_HUMAN	Q5U623		HSPB9_HUMAN	Q9BQS6		RIMS2_HUMAN	Q9UQ26		COL19A1	Q14993		Q10471				P13994			Q9H939	Q10471	O14879
	COL6A3	P12111		ATG12_HUMAN	O94817		CH60_HUMAN	P10809		RIMS3_HUMAN	Q9UJD0		COL1A1	P02452		Q14353				Q96JN2			Q9P2B2	Q14353	P13164
	COL6A5	A8TX70		ATG13_HUMAN	O75143		CH10_HUMAN	P61604		RIMS4_HUMAN	Q9H426		COL1A2	P08123		Q14697				Q8IYE0			Q8N8N7	Q14697	P01562
	COL6A6	A6NMZ7		ATG2B_HUMAN	Q96BY7		PGBM_HUMAN	P98160		RIN1_HUMAN	Q13671		COL3A1	P02461		P04406				Q6TFL3			P23219	P04406	P01579
	COLEC10	Q9Y6Z7		ATG4C_HUMAN	Q96DT6		HS105_HUMAN	Q92598		RIN2_HUMAN	Q8WYP3		COL4A2	P08572		P41250				Q9UL16			P21246	P41250	Q9Y6M1
	COLEC11	Q9BWP8		ATG4D_HUMAN	Q86TL0		5HT1A_HUMAN	P08908		RIN3_HUMAN	Q8TB24		COL4A3	Q01955		P22102				Q86WR0			P18031	P22102	O95163
	COLEC12	Q5KU26		PGGHG_HUMAN	Q32M88		5HT1D_HUMAN	P28221		RING1_HUMAN	Q06587		COL4A4	P53420		P50440				Q9BQI4			Q05209	P50440	P22301
	COMP	P49747		PUR9_HUMAN	P31939		5HT1E_HUMAN	P28566		RIOK1_HUMAN	Q9BRS2		COL5A1	P20908		Q04446				Q4G0X9			Q99952	Q04446	P29459
	COMT	P21964		ATLA1_HUMAN	Q8WXF7		5HT1F_HUMAN	P30939		RIOK2_HUMAN	Q9BVS4		COL5A2	P05997		P02774				Q96MW1			P08575	P02774	P29460
	COPA	P53621		ATM_HUMAN	Q13315		5HT2A_HUMAN	P28223		RIOK3_HUMAN	O14730		COL6A1	P12109		P28676				Q8IVM0			Q16849	P28676	P35225
	COPB1	P53618		ATMIN_HUMAN	O43313		5HT2B_HUMAN	P41595		RIPK1_HUMAN	Q13546		COL6A2	P12110		P48506				Q9Y3C0			Q08623	P48506	Q16552
	COPB2	P35606		ATN1_HUMAN	P54259		5HT2C_HUMAN	P28335		RIPK2_HUMAN	O43353		COL6A3	P12111		Q92616				Q4VC31			Q9UHX1	Q92616	Q14116
	COPE	O14579		ATOH1_HUMAN	Q92858		5HT4R_HUMAN	Q13639		RIPK3_HUMAN	Q9Y572		COL8A1	P27658		P23434				Q16204			P61026	P23434	Q13478
	COPG1	Q9Y678		ATOX1_HUMAN	O00244		5HT6R_HUMAN	P50406		DSCR6_HUMAN	P57055		COL9A2	Q14055		Q9Y2T3				Q8IWA6			P51153	Q9Y2T3	P01583
	COPG2	Q9UBF2		AT10A_HUMAN	O60312		5HT7R_HUMAN	P34969		RIT1_HUMAN	Q92963		COLEC10	Q9Y6Z7		Q99988				Q8NA47			Q9NP72	Q99988	P01584
	COPS2	P61201		AT10B_HUMAN	O94823		HTRA1_HUMAN	Q92743		BC11B_HUMAN	Q9C0K0		COLEC11	Q9BWP8		Q9UK05				A1A5D9			P61019	Q9UK05	Q9NZN1
	COPS3	Q9UNS2		AT10D_HUMAN	Q9P241		HTRA2_HUMAN	O43464		RIT2_HUMAN	Q99578		COMP	P49747		P31150				Q9H2F9			Q15286	P31150	P18510
	COPS4	Q9BT78		AT11A_HUMAN	P98196		HTRA3_HUMAN	P83110		RLBP1_HUMAN	P12271		COMT	P21964		P50395				Q96M83			Q15042	P50395	P60568
	COPS5	Q92905		AT11B_HUMAN	Q9Y2G3		HTRA4_HUMAN	P83105		INSL3_HUMAN	P51460		COPA	P53621		P14136				Q8IV32			P20339	P14136	Q9HBE4
	COPS6	Q7L5N1		AT11C_HUMAN	Q8NB49		SC6A4_HUMAN	P31645		RLF_HUMAN	Q13129		COPB1	P53618		O75223				Q9H0W5			P61020	O75223	Q9NPH9
	COPS7A	Q9UBW8		AT12A_HUMAN	P54707		HD_HUMAN	P42858		RNF12_HUMAN	Q9NVW2		COPB2	P35606		Q92820				Q8IWF9			P61006	Q92820	P24001
	COPS7B	Q9H9Q2		AT131_HUMAN	Q9HD20		HUNK_HUMAN	P57058		REL1_HUMAN	P04808		COPG1	Q9Y678		P19440				Q15834			Q92930	P19440	P05112
	COPS8	Q99627		AT132_HUMAN	Q9NQ11		HUWE1_HUMAN	Q7Z6Z7		REL2_HUMAN	P04090		COPG2	Q9UBF2		Q9UBU3				Q3V6T2			P63000	Q9UBU3	P05231
	COPZ1	P61923		AT133_HUMAN	Q9H7F0		HYAL1_HUMAN	Q12794		RMD5B_HUMAN	Q96G75		CORIN	Q9Y5Q5		Q9Y2X7				A6NC98			P15153	Q9Y2X7	P13232
	CORO1A	P31146		AT134_HUMAN	Q4VNC1		HYAL2_HUMAN	Q12891		RNAS1_HUMAN	P07998		CORO1A	P31146		Q9NS71				Q7Z6B0			P54725	Q9NS71	P10145
	CORO1B	Q9BR76		AT1A1_HUMAN	P05023		HYI_HUMAN	Q5T013		RNS10_HUMAN	Q5GAN6		CORO1B	Q9BR76		P16278				Q8TD31			Q9H6Z4	P16278	Q8TCT8
	CORO1C	Q9ULV4		AT1A2_HUMAN	P50993		HYOU1_HUMAN	Q9Y4L1		RNS11_HUMAN	Q8TAA1		CORO1C	Q9ULV4		O94923				Q13939			P52306	O94923	Q9NV31
	CORO7	P57737		AT1A3_HUMAN	P13637		IAPP_HUMAN	P10997		RNAS2_HUMAN	P10153		CORO2B	Q9UQ03		Q9H4G4				P32238			P49788	Q9H4G4	Q92835
	COTL1	Q14019		AT1A4_HUMAN	Q13733		SYIC_HUMAN	P41252		ECP_HUMAN	P12724		COTL1	Q14019		Q04760				P32239			Q16576	Q04760	P01308
	COX17	Q14061		AT1B2_HUMAN	P14415		ICA69_HUMAN	Q05084		RNAS4_HUMAN	P34096		COX5A	P20674		P35754				P51671			O75884	P35754	O15503
	COX4I1	P13073		AT2A1_HUMAN	O14983		ICAM1_HUMAN	P05362		RNAS6_HUMAN	Q93091		COX6B1	P14854		P00367				Q92583			Q96PK6	P00367	Q9Y573
	COX5A	P20674		AT2A2_HUMAN	P16615		ICAM2_HUMAN	P13598		RNAS8_HUMAN	Q8TDE3		CP	P00450		P15104				P78556			P98179	P15104	Q86VI3
	COX5B	P10606		AT2A3_HUMAN	Q93084		ICAM3_HUMAN	P32942		RNH2C_HUMAN	Q8TDP1		CPA3	P15088		P17900				Q9Y258			P50120	P17900	Q9Y616
	COX6B1	P14854		AT2B1_HUMAN	P20020		ICAM4_HUMAN	Q14773		RN5A_HUMAN	Q05823		CPA4	Q9UI42		P60983				P80075			Q15293	P60983	Q9NWZ3
	COX6C	P09669		AT2B2_HUMAN	Q01814		ICAM5_HUMAN	Q9UMF0		RNT2_HUMAN	O00584		CPB1	P15086		O60234				P78396			Q8TC12	O60234	P48200
	COX7A2	P14406		AT2B3_HUMAN	Q16720		ICK_HUMAN	Q9UPZ9		RND3_HUMAN	P61587		CPB2	Q96IY4		P36959				P20248			P35241	P36959	Q9H1B7
	CP	P00450		AT2B4_HUMAN	P23634		ICMT_HUMAN	O60725		RN103_HUMAN	O00237		CPE	P16870		Q9P2T1				Q8WWL7			Q00765	Q9P2T1	Q02556
	CPA1	P15085		AT2C1_HUMAN	P98194		ICOS_HUMAN	Q9Y6W8		RNF11_HUMAN	Q9Y3C5		CPM	P14384		Q14344				P24863			P00797	Q14344	P35568
	CPA2	P48052		AT2C2_HUMAN	O75185		ICOSL_HUMAN	O75144		RN112_HUMAN	Q9ULX5		CPN1	P15169		P63096				P30281			P51606	P63096	Q9Y4H2
	CPA4	Q9UI42		ATP4A_HUMAN	P20648		ICT1_HUMAN	Q14197		R113B_HUMAN	Q8IZP6		CPN2	P22792		P08754				P24864			Q9Y3B8	P08754	P78414
	CPAMD8	Q8IZJ3		ATP4B_HUMAN	P51164		ID1_HUMAN	P41134		RN114_HUMAN	Q9Y508		CPNE1	Q99829		P62873				O96020			Q14699	P62873	P78413
	CPB1	P15086		ATPA_HUMAN	P25705		ID2_HUMAN	Q02363		RN115_HUMAN	Q9Y4L5		CPNE3	O75131		O14775				P41002			Q96B86	O14775	O75578
	CPB2	Q96IY4		ATPB_HUMAN	P06576		ID4_HUMAN	P47928		RNF13_HUMAN	O43567		CPNE5	Q9HCH3		Q9UJJ9				Q16589			Q6NW40	Q9UJJ9	P18564
	CPD	O75976		ATPG_HUMAN	P36542		IDE_HUMAN	P14735		GOLI_HUMAN	Q86XS8		CPNE6	O95741		Q14789				P51946			O43665	Q14789	Q14571
	CPE	P16870		ATPD_HUMAN	P30049		IDHC_HUMAN	O75874		RNF14_HUMAN	Q9UBS8		CPQ	Q9Y646		Q8NBJ4				Q14094			Q9NS28	Q8NBJ4	Q14573
	CPM	P14384		AT5F1_HUMAN	P24539		IDHP_HUMAN	P48735		R144A_HUMAN	P50876		CPS1	P31327		P17174				P32246			Q15382	P17174	Q15811
	CPN1	P15169		AT5G1_HUMAN	P05496		IDH3A_HUMAN	P50213		RN146_HUMAN	Q9NTX7		CPSF1	Q10570		P00505				O00590			P08134	P00505	P23458
	CPN2	P22792		ATP5I_HUMAN	P56385		IDH3B_HUMAN	O43837		RNF17_HUMAN	Q9BXT8		CPSF2	Q9P2I0		P07359				P41597			Q8TB24	P07359	O60674
	CPNE1	Q99829		ATP5J_HUMAN	P18859		IDH3G_HUMAN	P51553		RN19A_HUMAN	Q9NV58		CPSF4	O95639		P40197				P51677			Q93091	P40197	Q96AA8
	CPNE3	O75131		ATP5L_HUMAN	O75964		IDI1_HUMAN	Q13907		RN19B_HUMAN	Q6ZMZ0		CPSF6	Q16630		Q9HCN6				O00421			O00584	Q9HCN6	Q92833
	CPOX	P36551		ATPO_HUMAN	P48047		I23O1_HUMAN	P14902		BRE1A_HUMAN	Q5VTR2		CPT1A	P50416		O75487				P51684			Q9Y6N7	O75487	Q9Y4A0
	CPPED1	Q9BRF8		ATP5S_HUMAN	Q99766		IDS_HUMAN	P22304		RN213_HUMAN	Q63HN8		CPT2	P23786		P21695				P51686			Q01973	P21695	O76095
	CPQ	Q9Y646		VAS1_HUMAN	Q15904		IDUA_HUMAN	P35475		RN214_HUMAN	Q8ND24		CR1	P17927		P43304				Q9UK39			O75695	P43304	P17275
	CPS1	P31327		RENR_HUMAN	O75787		IEX1_HUMAN	P46695		RN216_HUMAN	Q9NWF9		CR2	P20023		P06744				Q92526			Q02878	P06744	P17535
	CPSF6	Q16630		VPP1_HUMAN	Q93050		IER5_HUMAN	Q5VY09		RN217_HUMAN	Q8TC41		CRABP1	P29762		P80108				Q04900			P62244	P80108	Q14678
	CPT1A	P50416		VPP2_HUMAN	Q9Y487		IF16_HUMAN	Q16666		RN220_HUMAN	Q5VTB9		CRB1	P82279		Q14956				Q99467			P08708	Q14956	Q9H7Z6
	CPT2	P23786		VPP4_HUMAN	Q9HBG4		IFI27_HUMAN	P40305		RNF25_HUMAN	Q96BH1		CREBBP	Q92793		Q13098				P15391			P62266	Q13098	O94819
	CPVL	Q9H3G5		VATL_HUMAN	P27449		I27L2_HUMAN	Q9H2X8		RNF26_HUMAN	Q9BY78		CRH	P06850		P24298				P29016			P62851	P24298	P22459
	CR1	P17927		VA0D1_HUMAN	P61421		IN35_HUMAN	P80217		RNF31_HUMAN	Q96EP0		CRHBP	P24387		P07203				P06729			P62753	P07203	Q9H3M0
	CR2	P20023		VATA_HUMAN	P38606		IFI44_HUMAN	Q8TCB0		RNF38_HUMAN	Q9H0F5		CRIP1	P50238		P22352				P41217			P62081	P22352	P78508
	CRAT	P43155		VATB1_HUMAN	P15313		IFIT1_HUMAN	P09914		BRE1B_HUMAN	O75150		CRISP3	P54108		P36969				P20963			P10301	P36969	P48549
	CRB2	Q5IJ48		VATB2_HUMAN	P21281		IFIT2_HUMAN	P09913		RNF6_HUMAN	Q9Y252		CRISPLD1	Q9H336		O75791				O95400			O00442	O75791	Q13303
	CREG1	O75629		VATC1_HUMAN	P21283		IFIT3_HUMAN	O14879		RNF8_HUMAN	O76064		CRKL	P46109		P62993				P11049			Q9Y3I0	P62993	O14649
	CRELD1	Q96HD1		VATD_HUMAN	Q9Y5K8		IFM1_HUMAN	P13164		MCE1_HUMAN	O60942		CRLF3	Q8IUI8		Q9UBQ7				P07766			O75298	Q9UBQ7	Q9H2S1
	CRELD2	Q6UXH1		VATE1_HUMAN	P36543		IFM2_HUMAN	Q01629		RNH1_HUMAN	O60930		CRNKL1	Q9BZJ0		P28799				P01730			O95197	P28799	P51787
	CRHBP	P24387		VATF_HUMAN	Q16864		IFNA1_HUMAN	P01562		RINI_HUMAN	P13489		CROT	Q9UKG9		P06396				P06127			Q9BZR6	P06396	O43526
	CRIM1	Q9NZV1		VATG1_HUMAN	O75348		IFN14_HUMAN	P01570		AMPB_HUMAN	Q9H4A4		CRP	P02741		P15170				P31358			P60903	P15170	Q8WVF5
	CRIP2	P52943		VATG2_HUMAN	O95670		IFN16_HUMAN	P05015		RNPL1_HUMAN	Q9HAU8		CRTAC1	Q9NQ79		P00390				P19397			P29034	P00390	Q9Y2K7
	CRISP3	P54108		VATG3_HUMAN	Q96LB4		IFNA2_HUMAN	P01563		RNPS1_HUMAN	Q15287		CRYAA	P02489		P48637				Q07108			P33764	P48637	Q7LBC6
	CRK	P46108		ATP7A_HUMAN	Q04656		INAR1_HUMAN	P17181		ROBO1_HUMAN	Q9Y6N7		CRYBA1	P05813		Q9Y2Q3				P32970			P04271	Q9Y2Q3	O94953
	CRKL	P46109		ATP7B_HUMAN	P35670		INAR2_HUMAN	P48551		ROBO2_HUMAN	Q9HCK4		CRYBB1	P53674		P78417				P21854			P0DJI8	P78417	Q9H3R0
	CRLF3	Q8IUI8		AT8A1_HUMAN	Q9Y2Q0		IFNB_HUMAN	P01574		ROBO3_HUMAN	Q96MS0		CRYL1	Q9Y2S2		P09211				P11912			P0DJI9	P09211	P41229
	CRNN	Q9UBG3		AT8A2_HUMAN	Q9NTI2		IFNG_HUMAN	P01579		ROBO4_HUMAN	Q8WZ75		CRYZ	Q08257		Q02747				P40259			Q9Y512	Q02747	Q9BY66
	CRP	P02741		AT8B1_HUMAN	O43520		INGR1_HUMAN	P15260		ROCK1_HUMAN	Q13464		CS	O75390		Q16661				P33681			Q14108	Q16661	Q14154
	CRTAC1	Q9NQ79		AT8B2_HUMAN	P98198		IFNL2_HUMAN	Q8IZJ0		ROCK2_HUMAN	O75116		CSAD	Q9Y600		Q02108				P10966			Q14162	Q02108	Q12767
	CRTAM	O95727		AT8B3_HUMAN	O60423		INLR1_HUMAN	Q8IU57		ROM1_HUMAN	Q03395		CSDE1	O75534		Q02153				Q9BWV3			Q96GP6	Q02153	Q12768
	CRYAB	P02511		AT8B4_HUMAN	Q8TF62		IFRD1_HUMAN	O00458		ROMO1_HUMAN	P60602		CSE1L	P55060		P08236				O60729			Q8WVM8	P08236	Q92628
	CRYBB1	P53674		ATP9A_HUMAN	O75110		IFRD2_HUMAN	Q12894		ROR1_HUMAN	Q01973		CSF1	P09603		P13807				Q13042			P05408	P13807	O15063
	CRYL1	Q9Y2S2		ATP9B_HUMAN	O43861		IF122_HUMAN	Q9HBG6		ROR2_HUMAN	Q01974		CSF1R	P07333		O75367				Q9UJX2			Q12765	O75367	Q5TB80
	CRYM	Q14894		A1ATR_HUMAN	P20848		IF140_HUMAN	Q96RY7		RORA_HUMAN	P35398		CSF2RB	P32927		O95479				P30307			Q96FV2	O95479	Q2LD37
	CRYZ	Q08257		ATR_HUMAN	Q13535		IFT27_HUMAN	Q9BW83		RORB_HUMAN	Q92753		CSF3	P09919		P46952				O60508			Q0VDG4	P46952	Q9P260
	CS	O75390		ANTR1_HUMAN	Q9H6X2		IFT52_HUMAN	Q9Y366		RORG_HUMAN	P51449		CSK	P41240		Q14520				Q5VT25			P31431	Q14520	P52732
	CSDE1	O75534		ATRN_HUMAN	O75882		IFT57_HUMAN	Q9NWB7		ROS1_HUMAN	P08922		CSMD2	Q7Z408		P40939				Q6DT37			P67812	P40939	Q9NQT8
	CSE1L	P55060		ATRN1_HUMAN	Q5VV63		IFT74_HUMAN	Q96LB3		STK19_HUMAN	P49842		CSNK1A1	P48729		Q16775				Q9H3Q1			P55735	Q16775	Q15058
	CSF1	P09603		ATRX_HUMAN	P46100		IFT80_HUMAN	Q9P2H3		RP1_HUMAN	P56715		CSNK1D	P48730		P42357				Q6NZY7			O76054	P42357	Q9NS87
	CSF1R	P07333		ATX1_HUMAN	P54253		IFT81_HUMAN	Q8WYA0		MARE2_HUMAN	Q15555		CSNK2B	P67870		P12081				Q9BXL8			Q9UDX3	P12081	Q9P2E2
	CSF2RA	P15509		ATX10_HUMAN	Q9UBB4		IFT88_HUMAN	Q13099		RP1L1_HUMAN	Q8IWN7		CSRP1	P21291		P69905				Q9UM11			O75396	P69905	O60333
	CSK	P41240		ATX2_HUMAN	Q99700		IGBP1_HUMAN	P78318		XRP2_HUMAN	O75695		CSRP3	P50461		P68871				Q9Y6N8			P53992	P68871	O43896
	CSNK2B	P67870		ATX2L_HUMAN	Q8WWM7		IGDC3_HUMAN	Q8IVU1		RP9_HUMAN	Q8TA86		CST1	P01037		P02042				O75309			Q8WVN6	P02042	O75037
	CSPG4	Q6UVK1		ATX3_HUMAN	P54252		IGDC4_HUMAN	Q8TDY8		RFA1_HUMAN	P27694		CST3	P01034		P14317				Q13634			Q9UBV2	P14317	Q14807
	CSRP1	P21291		ATX7_HUMAN	O15265		IGF1_HUMAN	P05019		RFA2_HUMAN	P15927		CST5	P28325		P51858				Q9HBT6			O60613	P51858	Q99661
	CSRP3	P50461		AT7L1_HUMAN	Q9ULK2		IGF1R_HUMAN	P08069		RFA3_HUMAN	P35244		CST6	Q15828		Q9ULI3				Q9UN71			Q8WWX9	Q9ULI3	O15066
	CST1	P01037		AUHM_HUMAN	Q13825		IGF2_HUMAN	P01344		RFA4_HUMAN	Q13156		CST7	O76096		P06865				Q9UJ99			Q13214	P06865	O14782
	CST2	P09228		AUP1_HUMAN	Q9Y679		IF2B2_HUMAN	Q9Y6M1		RPE_HUMAN	Q96AT9		CSTA	P01040		P07686				Q86UP0			O95025	P07686	Q2VIQ3
	CST3	P01034		AURKA_HUMAN	O14965		MPRI_HUMAN	P11717		RPGR_HUMAN	Q92834		CSTB	P04080		Q93099				P22223			Q9NPR2	Q93099	O60282
	CST4	P01036		AURKB_HUMAN	Q96GD4		ALS_HUMAN	P35858		RPGR1_HUMAN	Q96KN7		CSTF2	P33240		Q04756				P55283			Q9C0C4	Q04756	Q92845
	CST6	Q15828		AURKC_HUMAN	Q9UQB9		IBP1_HUMAN	P08833		RP3A_HUMAN	Q9Y2J0		CTAGE5	O15320		O14964				Q9ULB5			Q9H3T2	O14964	Q9BW19
	CST7	O76096		AUTS2_HUMAN	Q8WXX7		IBP2_HUMAN	P18065		RPIA_HUMAN	P49247		CTBP1	Q13363		P31937				P55286			Q9UIV8	P31937	Q8IZU9
	CSTA	P01040		AVEN_HUMAN	Q9NQS1		IBP3_HUMAN	P17936		RL10_HUMAN	P27635		CTBP2	P56545		P49773				Q9ULB4			P50453	P49773	Q9Y2Y9
	CSTB	P04080		AVIL_HUMAN	O75366		IBP4_HUMAN	P22692		RL10A_HUMAN	P62906		CTBS	Q01459		Q9BX68				Q15131			Q99574	Q9BX68	O75840
	CTBS	Q01459		V1AR_HUMAN	P37288		IBP5_HUMAN	P24593		RL11_HUMAN	P62913		CTDSP1	Q9GZU7		P16401				P21127			Q9BYH1	P16401	O95600
	CTDSPL	O15194		V1BR_HUMAN	P47901		IBP6_HUMAN	P24592		RL12_HUMAN	P30050		CTDSPL	O15194		P16403				Q9NYV4			Q6UXD5	P16403	O60662
	CTGF	P29279		V2R_HUMAN	P30518		IBP7_HUMAN	Q16270		RL13_HUMAN	P26373		CTGF	P29279		P19367				Q14004			P35247	P19367	Q96PQ7
	CTH	P32929		AXDN1_HUMAN	Q5T1B0		IGFN1_HUMAN	Q86VF2		RL13A_HUMAN	P40429		CTNNA1	P35221		P52790				O94921			Q9BWM7	P52790	Q9P2G9
	CTHRC1	Q96CG8		AXIN1_HUMAN	O15169		IGHA2_HUMAN	P01877		RL14_HUMAN	P50914		CTNNA2	P26232		P01903				Q96Q40			O43556	P01903	Q9P2J3
	CTNNA1	P35221		AXIN2_HUMAN	Q9Y2T1		IGHG1_HUMAN	P01857		RL15_HUMAN	P61313		CTNNB1	P35222		P30511				Q00536			O43765	P30511	Q9P0G3
	CTNNB1	P35222		UFO_HUMAN	P30530		IGHG3_HUMAN	P01860		RL17_HUMAN	P18621		CTNND1	O60716		P08397				Q00537			Q9Y371	P08397	P20151
	CTNND1	O60716		ZA2G_HUMAN	P25311		IGHG4_HUMAN	P01861		RL18_HUMAN	Q07020		CTSB	P07858		P09429				Q07002			Q15465	P09429	P07288
	CTPS2	Q9NRF8		CP131_HUMAN	Q9UPN4		IGHM_HUMAN	P01871		RL18A_HUMAN	Q02543		CTSC	P53634		P26583				Q9BWU1			Q9UHJ6	P26583	Q03164
	CTSA	P10619		AZIN1_HUMAN	O14977		SMBP2_HUMAN	P38935		RL19_HUMAN	P84098		CTSD	P07339		P35914				O14519			Q9HAT2	P35914	Q8NEZ4
	CTSB	P07858		CAP7_HUMAN	P20160		IGJ_HUMAN	P01591		RL22_HUMAN	P35268		CTSF	Q9UBX1		Q01581				Q15078			Q9BZZ2	Q01581	P50748
	CTSC	P53634		B2MG_HUMAN	P61769		IGLL1_HUMAN	P15814		RL22L_HUMAN	Q6P5R6		CTSG	P08311		P54868				Q13319			Q9Y286	P54868	Q13601
	CTSD	P07339		B3GL1_HUMAN	O75752		IGSF8_HUMAN	Q969P0		RL23_HUMAN	P62829		CTSH	P09668		P82970				Q96SZ6			Q9Y336	P82970	Q99456
	CTSF	Q9UBX1		B3GT2_HUMAN	O43825		TUTLB_HUMAN	Q9UPX0		RL23A_HUMAN	P62750		CTSK	P43235		Q92619				Q5VV42			Q9H173	Q92619	Q2M2I5
	CTSG	P08311		B3GT4_HUMAN	O96024		IHH_HUMAN	Q14623		RL24_HUMAN	P83731		CTSL	P07711		P30519				Q00532			O75563	P30519	Q7Z3Z0
	CTSH	P09668		B3GT6_HUMAN	Q96L58		RED_HUMAN	Q13123		RL26L_HUMAN	Q9UNX3		CTSS	P25774		Q13151				P38936			P63208	Q13151	Q7Z3Y8
	CTSL	P07711		B3GA1_HUMAN	Q9P2W7		ELP1_HUMAN	O95163		RL27A_HUMAN	P46776		CTSW	P56202		P09651				P46527			Q13291	P09651	P04259
	CTSO	P43234		B3GA2_HUMAN	Q9NPZ5		IKKB_HUMAN	O14920		RL28_HUMAN	P46779		CTSZ	Q9UBR2		P22626				P49918			P53007	P22626	P48668
	CTSS	P25774		B3GA3_HUMAN	O94766		IKKE_HUMAN	Q14164		RL29_HUMAN	P47914		CTTN	Q14247		P51991				Q8N726			O43772	P51991	Q14CN4
	CTSV	O60911		B4GA1_HUMAN	O43505		NEMO_HUMAN	Q9Y6K9		RL3_HUMAN	P39023		CTTNBP2	Q8WZ74		Q99729				P42772			P11169	Q99729	Q86Y46
	CTSW	P56202		B3GN2_HUMAN	Q9NY97		IKZF1_HUMAN	Q13422		RL30_HUMAN	P62888		CUL1	Q13616		P07910				P55273			Q15043	P07910	Q6VAB6
	CTSZ	Q9UBR2		B3GN3_HUMAN	Q9Y2A9		IKZF2_HUMAN	Q9UKS7		RL31_HUMAN	P62899		CUL4B	Q13620		Q14103				Q00526			Q01650	Q14103	Q86UP2
	CTTN	Q14247		B4GN1_HUMAN	Q00973		IKZF3_HUMAN	Q9UKT9		RL32_HUMAN	P62910		CUL9	Q8IWT3		P52597				Q16667			P19634	P52597	Q8NBH2
	CUBN	O60494		B4GT1_HUMAN	P15291		IL10_HUMAN	P22301		RL34_HUMAN	P49207		CUX2	O14529		P31943				Q16878			Q15599	P31943	O00515
	CUL1	Q13616		B4GT5_HUMAN	O43286		I10R1_HUMAN	Q13651		RL35_HUMAN	P42766		CX3CL1	P78423		P31942				Q01850			Q8IVB4	P31942	P25391
	CUL3	Q13618		B4GT7_HUMAN	Q9UBV7		I10R2_HUMAN	Q08334		RL35A_HUMAN	P18077		CX3CR1	P49238		P61978				O75420			Q9H156	P61978	Q13753
	CUTA	O60888		BACE1_HUMAN	P56817		IL11_HUMAN	P20809		RL36_HUMAN	Q9Y3U8		CXCL1	P09341		P14866				Q9H211			O94933	P14866	Q6PKG0
	CXADR	P78310		BACE2_HUMAN	Q9Y5Z0		IL12A_HUMAN	P29459		RL3L_HUMAN	Q92901		CXCL10	P02778		P52272				P47902			Q8IW52	P52272	Q15031
	CXCL16	Q9H2A7		BACH1_HUMAN	O14867		IL12B_HUMAN	P29460		RL4_HUMAN	P36578		CXCL2	P19875		O43390				Q99626			Q9H5Y7	O43390	Q14739
	CXorf36	Q9H7Y0		BACH2_HUMAN	Q9BYV9		I12R1_HUMAN	P42701		RL5_HUMAN	P46777		CXCL3	P19876		Q00839				O14627			Q14BN4	Q00839	O60294
	CYB5A	P00167		BAD_HUMAN	Q92934		I12R2_HUMAN	Q99665		RL6_HUMAN	Q02878		CXCL5	P42830		Q9BUJ2				Q9Y6F8			Q9H4F8	Q9BUJ2	P09848
	CYB5B	O43169		BAG2_HUMAN	O95816		IL13_HUMAN	P35225		RL7_HUMAN	P18124		CXCL8	P10145		P00738				Q9Y6F7			P17405	P00738	Q6ZMR3
	CYB5R1	Q9UHQ9		BAG3_HUMAN	O95817		I13R1_HUMAN	P78552		RL7A_HUMAN	P62424		CXCL9	Q07325		P37235				Q9Y232			Q92484	P37235	Q9UJU2
	CYB5R3	P00387		BAG5_HUMAN	Q9UL15		I15RA_HUMAN	Q13261		RL7L_HUMAN	Q6DKI1		CYB5A	P00167		P32754				Q8N8U2			Q92485	P32754	Q9Y2U8
	CYBB	P04839		BAG6_HUMAN	P46379		IL16_HUMAN	Q14005		RL8_HUMAN	P62917		CYB5B	O43169		P00739				Q7Z692			P02814	P00739	Q8N0V4
	CYC1	P08574		BAGE2_HUMAN	Q86Y30		IL17_HUMAN	Q16552		RL9_HUMAN	P32969		CYC1	P08574		P00492				P40198			Q2TAY7	P00492	Q8N145
	CYCS	P99999		BAGE4_HUMAN	Q86Y28		IL17B_HUMAN	Q9UHF5		RLA0_HUMAN	P05388		CYCS	P99999		P02790				P49715			O00161	P02790	Q9HBX8
	CYFIP1	Q7L576		BAI1_HUMAN	O14514		IL17C_HUMAN	Q9P0M4		RLA1_HUMAN	P05386		CYP17A1	P05093		P04196				P17676			P60880	P04196	P15018
	CYTH2	Q99418		AGRB2_HUMAN	O60241		IL17D_HUMAN	Q8TAD2		RLA2_HUMAN	P05387		CYP1A1	P04798		Q86YZ3				P49716			O95721	Q86YZ3	P18858
	DAAM1	Q9Y4D1		AGRB3_HUMAN	O60242		IL17F_HUMAN	Q96PD4		RPN1_HUMAN	P04843		CYP21A2	P08686		P52758				Q15744			O95295	P52758	P49916
	DAD1	P61803		BAIP2_HUMAN	Q9UQB8		I17RA_HUMAN	Q96F46		RPN2_HUMAN	P04844		CYP2A6	P11509		Q99714				Q03701			P62304	Q99714	Q9UGP4
	DAG1	Q14118		BI2L2_HUMAN	Q6UXY1		I17RB_HUMAN	Q9NRM6		RPP14_HUMAN	O95059		CYP2B6	P20813		P51659				Q9BXF3			Q9UMY4	P51659	P53667
	DAPP1	Q9UN19		BAIP3_HUMAN	O94812		I17RD_HUMAN	Q8NFM7		RPP30_HUMAN	P78346		CYP2C18	P33260		P07900				Q9BXW7			O60749	P07900	Q8WWI1
	DARS	P14868		BAK_HUMAN	Q16611		IL18_HUMAN	Q14116		RPP38_HUMAN	P78345		CYP2C19	P33261		P08238				Q9BXQ6			P58062	P08238	P29536
	DAZAP1	Q96EP5		BAMBI_HUMAN	Q13145		I18BP_HUMAN	O95998		RPP40_HUMAN	O75818		CYP2C8	P10632		P14625				Q9UNI1			Q92563	P14625	Q8TBB1
	DBH	P09172		BAF_HUMAN	O75531		IL18R_HUMAN	Q13478		RPR1B_HUMAN	Q9NQG5		CYP3A4	P08684		P34931				P08217			Q9UBC9	P34931	Q8N448
	DBI	P07108		BARD1_HUMAN	Q99728		IL19_HUMAN	Q9UHD0		RS10_HUMAN	P46783		CYP3A43	Q9HB55		P54652				P08218			Q13813	P54652	Q14693
	DBN1	Q16643		BARH1_HUMAN	Q9BZE3		IL1A_HUMAN	P01583		RS11_HUMAN	P62280		CYP4F11	Q9HBI6		P34932				P09093			Q9Y6N5	P34932	Q92539
	DBNL	Q9UJU6		BARH2_HUMAN	Q9NY43		IL1B_HUMAN	P01584		RS12_HUMAN	P25398		CYTH1	Q15438		P11021				P08861			P30626	P11021	P98164
	DCBLD1	Q8N8Z6		BARX1_HUMAN	Q9HBU1		IL1R1_HUMAN	P14778		RS13_HUMAN	P62277		CYTH2	Q99418		P11142				Q9NYQ6			Q86TD4	P11142	Q9BY71
	DCBLD2	Q96PD2		BASP1_HUMAN	P80723		IL1R2_HUMAN	P27930		RS14_HUMAN	P62263		CYTL1	Q9NRR1		P38646				Q9HCU4			Q9Y5M8	P38646	Q8IWT6
	DCC	P43146		BAX_HUMAN	Q07812		IL1AP_HUMAN	Q9NPH3		RS15A_HUMAN	P62244		DAAM1	Q9Y4D1		P04792				Q8N111			Q9BXP5	P04792	Q9H089
	DCD	P81605		BAZ1A_HUMAN	Q9NRL2		IRPL1_HUMAN	Q9NZN1		RS16_HUMAN	P62249		DAB2	P98082		P10809				P07199			O75494	P10809	P62310
	DCHS1	Q96JQ0		BAZ1B_HUMAN	Q9UIG0		IRPL2_HUMAN	Q9NP60		RS17_HUMAN	P08708		DAG1	Q14118		P61604				Q03188			Q13243	P61604	Q06643
	DCLK1	O15075		BAZ2A_HUMAN	Q9UIF9		ILRL1_HUMAN	Q01638		RS18_HUMAN	P62269		DAP3	P51398		P98160				Q92674			Q04837	P98160	P36941
	DCN	P07585		BAZ2B_HUMAN	Q9UIF8		ILRL2_HUMAN	Q9HB29		RS19_HUMAN	P39019		DARS	P14868		Q92743				Q9HC77			A1L4H1	Q92743	Q9Y383
	DCPS	Q96C86		BBC3B_HUMAN	Q96PG8		IL1RA_HUMAN	P18510		AROS_HUMAN	Q86WX3		DAZAP1	Q96EP5		Q12794				Q9NSP4			Q11201	Q12794	O95232
	DCTD	P32321		BBC3_HUMAN	Q9BXH1		IL2_HUMAN	P60568		RS2_HUMAN	P15880		DBH	P09172		Q9Y4L1				Q6ZU80			Q9Y274	Q9Y4L1	O94772
	DCTN1	Q14203		BODG_HUMAN	O75936		I20RA_HUMAN	Q9UHF4		RS20_HUMAN	P60866		DBI	P07108		P05362				Q9BYV8			P15907	P05362	Q9Y250
	DCTN2	Q13561		BBS1_HUMAN	Q8NFJ9		IL21_HUMAN	Q9HBE4		RS21_HUMAN	P63220		DBN1	Q16643		P13598				Q9C0F1			Q9NSC7	P13598	Q13257
	DCTN3	O75935		BBS2_HUMAN	Q9BXC9		IL22_HUMAN	Q9GZX6		RS23_HUMAN	P62266		DBNL	Q9UJU6		P32942				Q96MT8			Q92187	P32942	P20916
	DCTN5	Q9BTE1		BBS4_HUMAN	Q96RK4		IL24_HUMAN	Q13007		RS24_HUMAN	P62847		DBT	P11182		Q9UMF0				Q9P209			Q9NY15	Q9UMF0	O60732
	DCTPP1	Q9H773		BBS7_HUMAN	Q8IWZ6		IL26_HUMAN	Q9NPH9		RS25_HUMAN	P62851		DCAF1	Q9Y4B6		O75144				Q8TAP6			P51692	O75144	Q9HCI5
	DCUN1D1	Q96GG9		BBX_HUMAN	Q8WY36		I27RA_HUMAN	Q6UWB1		RS26_HUMAN	P62854		DCC	P43146		P14735				Q9Y6K0			P52823	P14735	Q96QZ7
	DCXR	Q7Z4W1		BCAM_HUMAN	P50895		IL2RA_HUMAN	P01589		RS27_HUMAN	P42677		DCD	P81605		O75874				Q8TCT0			O76061	O75874	P20794
	DDAH1	O94760		PGCB_HUMAN	Q96GW7		IL2RG_HUMAN	P31785		RS28_HUMAN	P62857		DCDC2	Q9UHG0		P48735				P27544			Q9Y6E0	P48735	P78559
	DDAH2	O95865		BAP29_HUMAN	Q9UHQ4		IL3_HUMAN	P08700		RS3_HUMAN	P23396		DCHS1	Q96JQ0		P50213				Q9HA82			P16949	P50213	P11137
	DDB1	Q16531		BAP31_HUMAN	P51572		IL32_HUMAN	P24001		RS3A_HUMAN	P61247		DCLK1	O15075		P35475				Q6ZMG9			Q9UJZ1	P35475	P45985
	DDC	P20711		BCAR1_HUMAN	P56945		IL33_HUMAN	O95760		RS4X_HUMAN	P62701		DCN	P07585		P17181				Q12798			O43815	P17181	O14733
	DDI2	Q5TDH0		BCAR3_HUMAN	O75815		IL36A_HUMAN	Q9UHA7		RS4Y1_HUMAN	P22090		DCP1A	Q9NPI6		Q8TDY8				P41208			Q9NRL3	Q8TDY8	Q99759
	DDOST	P39656		BCAS1_HUMAN	O75363		IL36B_HUMAN	Q9NZH7		RS5_HUMAN	P46782		DCTN1	Q14203		P05019				O15182			O75558	P05019	Q99683
	DDR1	Q08345		BCAS3_HUMAN	Q9H6U6		IL3RA_HUMAN	P26951		RS6_HUMAN	P62753		DCXR	Q7Z4W1		P08069				O15519			Q12846	P08069	O95382
	DDR2	Q16832		BCAS4_HUMAN	Q8TDM0		IL4_HUMAN	P05112		KS6A1_HUMAN	Q15418		DDAH1	O94760		P01344				P0DN87			P50225	P01344	P41279
	DDRGK1	Q96HY6		BCAT1_HUMAN	P54687		OXLA_HUMAN	Q96RQ9		KS6A2_HUMAN	Q15349		DDAH2	O95865		P11717				P0DN86			Q06520	P11717	Q8IVH8
	DDX1	Q92499		BCAT2_HUMAN	O15382		IL4RA_HUMAN	P24394		KS6A3_HUMAN	P51812		DDB1	Q16531		P35858				Q0VF96			Q8NBK3	P35858	O95819
	DDX17	Q92841		CHLE_HUMAN	P06276		IL5RA_HUMAN	Q01344		KS6A4_HUMAN	O75676		DDHD1	Q8NEL9		P08833				Q13111			P51687	P08833	P31152
	DDX21	Q9NR30		ODBA_HUMAN	P12694		IL6_HUMAN	P05231		KS6A5_HUMAN	O75582		DDI2	Q5TDH0		P18065				P28329			O15260	P18065	Q13164
	DDX39B	Q13838		ODBB_HUMAN	P21953		IL6RA_HUMAN	P08887		KS6A6_HUMAN	Q9UK32		DDOST	P39656		P17936				Q9BRQ6			Q9UGT4	P17936	Q9UQF2
	DDX3X	O00571		BCKD_HUMAN	O14874		IL6RB_HUMAN	P40189		KS6B1_HUMAN	P23443		DDT	P30046		P22692				O14646			Q4LDE5	P22692	O95460
	DDX5	P17844		BCL10_HUMAN	O95999		IL7_HUMAN	P13232		KS6B2_HUMAN	Q9UBS0		DDX1	Q92499		P24593				Q86WJ1			Q9UH65	P24593	P02686
	DECR1	Q16698		BC11A_HUMAN	Q9H165		IL7RA_HUMAN	P16871		KS6C1_HUMAN	Q96S38		DDX17	Q92841		P24592				O00258			Q0VAF6	P24592	Q96RQ3
	DENR	O43583		BC11B_HUMAN	Q9C0K0		IL8_HUMAN	P10145		RS7_HUMAN	P62081		DDX18	Q9NVP1		Q16270				Q8TDI0			P43405	Q16270	P10911
	DERA	Q9Y315		BCL2_HUMAN	P10415		IL9R_HUMAN	Q01113		RS8_HUMAN	P62241		DDX19B	Q9UMR2		P15814				Q8NE62			Q96C24	P15814	Q07820
	DES	P17661		B2CL1_HUMAN	Q07817		ILDR1_HUMAN	Q86SU0		RS9_HUMAN	P46781		DDX20	Q9UHI6		Q14623				Q8IWX8			O95359	Q14623	P33992
	DGCR2	P98153		B2L10_HUMAN	Q9HD36		ILF2_HUMAN	Q12905		RSSA_HUMAN	P08865		DDX21	Q9NR30		O14920				Q96FC9			Q03519	O14920	Q14566
	DHCR7	Q9UBM7		B2L12_HUMAN	Q9HB09		ILF3_HUMAN	Q12906		RPTOR_HUMAN	Q8N122		DDX24	Q9GZR7		Q08334				P24386			O75347	Q08334	P33993
	DHRS11	Q6UWP2		B2L13_HUMAN	Q9BXK5		ILK_HUMAN	Q13418		RUSD2_HUMAN	Q8IZ73		DDX25	Q9UHL0		Q14005				P26374			Q99426	Q14005	Q9UJA3
	DHRS7	Q9Y394		B2CL2_HUMAN	Q92843		MIC60_HUMAN	Q16891		RAD_HUMAN	P55042		DDX39B	Q13838		P27930				Q96CF2			O15273	P27930	Q96EZ8
	DHX15	O43143		BCL3_HUMAN	P20749		IF2B3_HUMAN	O00425		RRAGD_HUMAN	Q9NQL2		DDX3X	O00571		Q9NPH3				Q9H9P2			P20062	Q9NPH3	Q9NU22
	DHX9	Q08211		BCL6_HUMAN	P41182		SPP2A_HUMAN	Q8TCT8		RRAS_HUMAN	P10301		DDX3Y	O15523		Q01638				O43745			Q03403	Q01638	Q16798
	DIABLO	Q9NR28		BCL6B_HUMAN	Q8N143		IMP3_HUMAN	Q9NV31		RRBP1_HUMAN	Q9P2E9		DDX41	Q9UJV9		P01589				Q8IZ52			Q07654	P01589	Q16626
	DIAPH1	O60610		BCL9_HUMAN	O00512		IMPA1_HUMAN	P29218		RREB1_HUMAN	Q92766		DDX42	Q86XP3		P24394				Q9NRG0			Q92734	P24394	O75448
	DKC1	O60832		BCL9L_HUMAN	Q86UU0		IMPA2_HUMAN	O14732		OPSX_HUMAN	O14718		DDX46	Q7L014		Q01344				P11229			O43294	Q01344	Q96G25
	DKK3	Q9UBP4		BCLF1_HUMAN	Q9NYF8		IMDH1_HUMAN	P20839		RIR1_HUMAN	P23921		DDX47	Q9H0S4		P08887				P08172			P21980	P08887	Q14680
	DLD	P09622		BCDO1_HUMAN	Q9HAY6		IMDH2_HUMAN	P12268		RIR2_HUMAN	P31350		DDX5	P17844		P40189				P20309			Q9UJW2	P40189	Q9UBP6
	DLK1	P80370		BCDO2_HUMAN	Q9BYV7		AINX_HUMAN	Q16352		RRN3_HUMAN	Q9NYV6		DDX50	Q9BQ39		Q12905				P08173			Q07157	Q12905	Q96IZ6
	DLL1	O00548		BCOR_HUMAN	Q6W2J9		INCE_HUMAN	Q9NQS7		RRP1B_HUMAN	Q14684		DDX54	Q8TDD1		Q12906				P08912			Q3LXA3	Q12906	Q86U44
	DLST	P36957		BCR_HUMAN	P11274		INF2_HUMAN	Q27J81		RRP7A_HUMAN	Q9Y3A4		DDX6	P26196		Q13418				P02708			Q9HD45	Q13418	Q8N3F8
	DMBT1	Q9UGM3		BCS1_HUMAN	Q9Y276		ING1_HUMAN	Q9UK53		U3IP2_HUMAN	O43818		DECR1	Q16698		P12268				Q9GZZ6			P49755	P12268	Q99797
	DMGDH	Q9UI17		BDH_HUMAN	Q02338		ING2_HUMAN	Q9H160		RRS1_HUMAN	Q15050		DEFA1	P59665		P08476				Q15822			Q9BTV4	P08476	Q8TD10
	DMKN	Q6E0U4		BKRB1_HUMAN	P46663		INHA_HUMAN	P05111		RSF1_HUMAN	Q96T23		DEFA5	Q01523		P55103				P32297			P28289	P55103	P46013
	DMTN	Q08495		BDNF_HUMAN	P23560		INHBA_HUMAN	P08476		RLP24_HUMAN	Q9UHA3		DEFA6	Q01524		P58166				P43681			Q9NP84	P58166	P40692
	DNAJA1	P31689		BECN1_HUMAN	Q14457		INHBC_HUMAN	P55103		RSPH1_HUMAN	Q8WYR4		DEK	P35659		P06213				Q15825			Q02223	P06213	Q9UHC1
	DNAJA2	O60884		BEGIN_HUMAN	Q9BUH8		INHBE_HUMAN	P58166		RSRC1_HUMAN	Q96IZ7		DENND1A	Q8TEH3		Q9UI26				P11230			O43508	Q9UI26	P55196
	DNAJB1	P25685		BEST2_HUMAN	Q8NFU1		INPP_HUMAN	P49441		RSU1_HUMAN	Q15404		DENR	O43583		O00410				P17787			Q9UKE5	O00410	Q9BV36
	DNAJB11	Q9UBS4		BEST3_HUMAN	Q8N1M1		INP4A_HUMAN	Q96PE3		RTCA_HUMAN	O00442		DERL1	Q9BUN8		O95373				Q05901			Q9C0C2	O95373	Q9UH92
	DNAJC3	Q13217		BEST4_HUMAN	Q8NFU0		I5P1_HUMAN	Q14642		RTCB_HUMAN	Q9Y3I0		DERL3	Q96Q80		P46940				P30926			P19237	P46940	Q9NP71
	DNAJC9	Q8WXX5		BET1_HUMAN	O15155		I5P2_HUMAN	P32019		RSP14_HUMAN	Q9UHP6		DES	P17661		Q13576				Q07001			P45379	Q13576	P45452
	DNASE1	P24855		BET1L_HUMAN	Q9NYM9		SHIP1_HUMAN	Q92835		RTEL1_HUMAN	Q9NZ71		DFFA	O00273		P53990				Q04844			O60784	P53990	P51511
	DNASE1L1	P49184		BEX5_HUMAN	Q5H9J7		MPPA_HUMAN	Q10713		RTF2_HUMAN	Q9BY42		DGCR8	Q8WYQ5		P56199				P07510			O94826	P56199	Q9H239
	DNASE2	O00115		BFSP1_HUMAN	Q12934		INP5E_HUMAN	Q9NRR6		RTN1_HUMAN	Q16799		DGKB	Q9Y6T7		P17301				O43916			Q53FA7	P17301	P09237
	DNER	Q8NFT8		BFSP2_HUMAN	Q13515		PI5PA_HUMAN	Q15735		RTN2_HUMAN	O75298		DGKD	Q16760		P08514				Q8NCH0			P55327	P08514	P50219
	DNM1	Q05193		OSTCN_HUMAN	P02818		INP5K_HUMAN	Q9BT40		RTN3_HUMAN	O95197		DGKG	P49619		P13612				Q9NS84			Q9H3S4	P13612	Q9H8S9
	DNM1L	O00429		PGS1_HUMAN	P21810		INS_HUMAN	P01308		RTN4_HUMAN	Q9NQC3		DGKQ	P52824		P08648				Q7L1S5			Q9BW30	P08648	Q9UBU8
	DNM2	P50570		BHA15_HUMAN	Q7RTS1		INSI1_HUMAN	O15503		RTN4R_HUMAN	Q9BZR6		DGKZ	Q13574		P23229				Q86X52			O60704	P23229	Q15014
	DNPEP	Q9ULA0		BHE40_HUMAN	O14503		INSL5_HUMAN	Q9Y5Q6		R4RL2_HUMAN	Q86UN3		DHPS	P49366		P53708				Q70JA7			O43280	P53708	Q9HCE1
	DNPH1	O43598		BHE41_HUMAN	Q9C0J9		INSM1_HUMAN	Q01101		RTP4_HUMAN	Q96DX8		DHTKD1	Q96HY7		P05556				Q9P2E5			Q9NZC2	P05556	O75970
	DOK1	Q99704		BHMT1_HUMAN	Q93088		INSR_HUMAN	P06213		RUFY1_HUMAN	Q96T51		DHX15	O43143		P05107				Q8WVB6			Q9UKU6	P05107	Q8N3R9
	DOK2	O60496		BHMT2_HUMAN	Q9H2M3		INSRR_HUMAN	P14616		RUN3A_HUMAN	Q59EK9		DHX29	Q7Z478		P05106				O15111			Q15654	P05106	P49959
	DOK3	Q7L591		BICD1_HUMAN	Q96G01		INT4_HUMAN	Q96HW7		RUNX1_HUMAN	Q01196		DHX35	Q9H5Z1		P16144				O76071			Q8WUA8	P16144	Q9NV56
	DPEP1	P16444		BICD2_HUMAN	Q8TD16		INT5_HUMAN	Q6P9B9		MTG8_HUMAN	Q06455		DHX38	Q92620		P18084				Q99828			Q13630	P18084	P49406
	DPEP2	Q9H4A9		BID_HUMAN	P55957		INTU_HUMAN	Q9ULD6		RUNX2_HUMAN	Q13950		DHX8	Q14562		P26010				Q96Q77			Q9NY65	P26010	Q9P0M9
	DPEP3	Q9H4B8		BIK_HUMAN	Q13323		IP6K1_HUMAN	Q92551		RUNX3_HUMAN	Q13761		DHX9	Q08211		P19827				Q96AQ7			Q96J42	P19827	Q9NQ50
	DPM3	Q9P2X0		BIN1_HUMAN	O00499		IP6K2_HUMAN	Q9UHH9		RUSC1_HUMAN	Q9BVN2		DIABLO	Q9NR28		P19823				Q9NSE2			Q9BRA2	P19823	Q9HD33
	DPP3	Q9NY33		BIN2_HUMAN	Q9UBW5		IP6K3_HUMAN	Q96PC2		RUSC2_HUMAN	Q8N2Y8		DIAPH1	O60610		Q06033				O14578			P17643	Q06033	Q13405
	DPP4	P27487		BIN3_HUMAN	Q9NQY0		IPMK_HUMAN	Q8NFU5		RUVB1_HUMAN	Q9Y265		DIAPH2	O60879		Q14624				Q99966			Q9UBT2	Q14624	Q9Y2R5
	DPP7	Q9UHL4		BIRC2_HUMAN	Q13490		IPO11_HUMAN	Q9UI26		RUVB2_HUMAN	Q9Y230		DIAPH3	Q9NSV4		Q8WWA0				P61024			Q8TBC4	Q8WWA0	Q9Y399
	DPT	Q07507		BIRC3_HUMAN	Q13489		IPO13_HUMAN	O94829		RWDD1_HUMAN	Q9H446		DICER1	Q9UPY3		Q14643				Q8N2M8			P61086	Q14643	Q92665
	DPY30	Q9C005		BIRC5_HUMAN	O15392		IPO4_HUMAN	Q8TEX9		RWD2B_HUMAN	P57060		DIDO1	Q9BTC0		P07476				Q9UBD9			O14933	P07476	P82930
	DPYD	Q12882		BIRC6_HUMAN	Q9NR09		IPO5_HUMAN	O00410		RXFP2_HUMAN	Q8WXD0		DIP2C	Q9Y2E4		P78504				P35523			Q13404	P78504	P82933
	DPYS	Q14117		BIRC7_HUMAN	Q96CA5		IPO7_HUMAN	O95373		RL3R1_HUMAN	Q9NSD7		DIS3	Q9Y2L1		P01591				P51790			Q15819	P01591	O60682
	DPYSL2	Q16555		BIRC8_HUMAN	Q96P09		IPO8_HUMAN	O15397		RL3R2_HUMAN	Q8TDU9		DISC1	Q9NRI5		P14923				P51793			Q04323	P14923	P43246
	DPYSL3	Q14195		BLK_HUMAN	P51451		IPO9_HUMAN	Q96P70		RXRA_HUMAN	P19793		DKC1	O60832		Q96CX2				P51798			P15374	Q96CX2	P20585
	DSC1	Q08554		BLM_HUMAN	P54132		IPP_HUMAN	Q9Y573		RXRB_HUMAN	P28702		DKK3	Q9UBP4		P35968				P51800			Q9Y3C8	P35968	O43196
	DSC2	Q02487		BLMH_HUMAN	Q13867		IQCB1_HUMAN	Q15051		RXRG_HUMAN	P48443		DLC1	Q96QB1		P50053				P51801			Q92890	P50053	P52701
	DSC3	Q14574		BL1S4_HUMAN	Q9NUP1		IQCD_HUMAN	Q96DY2		RYK_HUMAN	P34925		DLD	P09622		Q92945				P78369			Q9H3U1	Q92945	Q8N5Y2
	DSG1	Q02413		BL1S5_HUMAN	Q8TDH9		IQCF1_HUMAN	Q8N6M8		RYR1_HUMAN	P21817		DLEC1	Q9Y238		O00139				P56749			Q9UBR1	O00139	P35548
	DSG2	Q14126		BIEA_HUMAN	P53004		IQCH_HUMAN	Q86VS3		RYR2_HUMAN	Q92736		DLG3	Q92796		P33176				O95500			P14927	P33176	Q13330
	DSG4	Q86SJ6		BLVRB_HUMAN	P30043		IQGA1_HUMAN	P46940		RYR3_HUMAN	Q15413		DLGAP5	Q15398		P10721				Q9Y5I7			P31930	P10721	O94776
	DSP	P15924		GO45_HUMAN	Q9H2G9		IQGA2_HUMAN	Q13576		S10A1_HUMAN	P23297		DLL3	Q9NYJ7		P21583				P56750			P22695	P21583	Q9BTC8
	DSTN	P60981		BMF_HUMAN	Q96LC9		IQGA3_HUMAN	Q86VI3		S10AA_HUMAN	P60903		DMAP1	Q9NPF5		Q9UBX7				P56880			P10746	Q9UBX7	Q99551
	DTD1	Q8TEA8		BMP1_HUMAN	P13497		IQUB_HUMAN	Q8NA54		S10AB_HUMAN	P31949		DMD	P11532		Q92876				Q8N7P3			O60763	Q92876	Q6P444
	DUSP14	O95147		BMP15_HUMAN	O95972		IRAK1_HUMAN	P51617		S10AC_HUMAN	P80511		DMGDH	Q9UI17		O60259				Q96B33			Q93009	O60259	Q13496
	DUSP3	P51452		BMP2_HUMAN	P12643		IRAK2_HUMAN	O43187		S10AD_HUMAN	Q99584		DMKN	Q6E0U4		P03952				O14493			O95292	P03952	Q13613
	DYNC1H1	Q14204		BMP2K_HUMAN	Q9NSY1		IRAK3_HUMAN	Q9Y616		S10AE_HUMAN	Q9HCY8		DMTN	Q08495		P01042				Q92478			Q9UKW4	P01042	Q13615
	DYNC1I2	Q13409		BMP3_HUMAN	P12645		IRAK4_HUMAN	Q9NWZ3		S10A2_HUMAN	P29034		DNA2	P51530		P52292				Q8WTT0			P61758	P52292	Q9Y217
	DYNLL1	P63167		BMP5_HUMAN	P22003		IREB2_HUMAN	P48200		S10A3_HUMAN	P33764		DNAAF5	Q86Y56		O60684				O14967			P45880	O60684	Q96QG7
	EBI3	Q14213		BMP6_HUMAN	P22004		IRF1_HUMAN	P10914		S10A4_HUMAN	P26447		DNAH3	Q8TD57		Q14974				Q96NY7			P98155	Q14974	P42345
	ECE1	P42892		BMP7_HUMAN	P18075		IRF2_HUMAN	P14316		S10A6_HUMAN	P06703		DNAH5	Q8TE73		P04264				Q8N3C7			Q7Z5L0	P04264	Q8WXI7
	ECH1	Q13011		BMP8B_HUMAN	P34820		I2BPL_HUMAN	Q9H1B7		S10A7_HUMAN	P31151		DNAH6	Q9C0G6		P13645				P49759			O95498	P13645	P20592
	ECHDC2	Q86YB7		BMPER_HUMAN	Q8N8U9		IRF3_HUMAN	Q14653		S1A7A_HUMAN	Q86SG5		DNAH7	Q8WXX0		P13646				Q13286			Q96RL7	P13646	Q9BQG0
	ECHDC3	Q96DC8		BMR1A_HUMAN	P36894		IRF4_HUMAN	Q15306		S10A8_HUMAN	P05109		DNAH8	Q96JB1		P02533				Q9NWW5			Q9H269	P02533	P10243
	ECHS1	P30084		BMPR2_HUMAN	Q13873		IRF5_HUMAN	Q13568		S10A9_HUMAN	P06702		DNAH9	Q9NYC9		P19012				Q7Z7G1			Q9UK41	P19012	Q99836
	ECI1	P42126		BMS1_HUMAN	Q14692		IRF6_HUMAN	O14896		S100B_HUMAN	P04271		DNAI1	Q9UI46		P08779				P54105			Q96IQ7	P08779	Q9UKX3
	ECM1	Q16610		BMX_HUMAN	P51813		IRF8_HUMAN	Q02556		S100P_HUMAN	P25815		DNAJB4	Q9UDY4		Q04695				O15516			Q9Y6W5	Q04695	P13535
	ECM2	O94769		BNC1_HUMAN	Q01954		IRF9_HUMAN	Q00978		S1PR1_HUMAN	P21453		DNAJC2	Q99543		P08727				O94992			Q969T9	P08727	O14950
	EDF1	O60869		BNC2_HUMAN	Q6ZN30		IRS1_HUMAN	P35568		S1PR2_HUMAN	O95136		DNM1	Q05193		P35908				Q92989			Q8IWB7	P35908	P14649
	EEF1A2	Q05639		SEC20_HUMAN	Q12981		IRS2_HUMAN	Q9Y4H2		S1PR3_HUMAN	Q99500		DNM1L	O00429		P35900				Q16740			Q8WWY7	P35900	Q8WY64
	EEF1B2	P24534		BNIP2_HUMAN	Q12982		IRS4_HUMAN	O14654		S1PR4_HUMAN	O95977		DNM2	P50570		P12035				O76031			Q14508	P12035	Q9H1R3
	EEF1D	P29692		BNIP3_HUMAN	Q12983		IRX1_HUMAN	P78414		SAA1_HUMAN	P0DJI8		DNM3	Q9UQ16		Q15323				O75153			O43516	Q15323	Q9HD67
	EEF1E1	O43324		BNI3L_HUMAN	O60238		IRX2_HUMAN	Q9BZI1		SAA2_HUMAN	P0DJI9		DNMT1	P26358		Q14525				Q8IZ96			Q9NQW7	Q14525	Q9UKN7
	EEF1G	P26641		BNIPL_HUMAN	Q7Z465		IRX3_HUMAN	P78415		SAA4_HUMAN	P35542		DNMT3A	Q9Y6K1		O76011				Q8TAZ6			O43895	O76011	Q9UBC5
	EEF2	P13639		BOK_HUMAN	Q9UMX3		IRX4_HUMAN	P78413		SACS_HUMAN	Q9NZJ4		DNPEP	Q9ULA0		Q92764				Q96MX0			Q9UIA9	Q92764	O94832
	EFCAB14	O75071		BOLA1_HUMAN	Q9Y3E2		IRX5_HUMAN	P78411		SAE1_HUMAN	Q9UBE0		DNTT	P04053		O76013				Q8IZR5			Q9H1B5	O76013	Q8NEV4
	EFEMP1	Q12805		BOLL_HUMAN	Q8N9W6		IRX6_HUMAN	P78412		SAFB1_HUMAN	Q15424		DNTTIP1	Q9H147		O76015				Q96DZ9			P16989	O76015	Q9Y4I1
	EFEMP2	O95967		BOP1_HUMAN	Q14137		ISG15_HUMAN	P05161		SAFB2_HUMAN	Q14151		DOCK1	Q14185		P19013				P29973			Q9UPT8	P19013	Q9ULV0
	EFHD2	Q96C19		BORA_HUMAN	Q6PGQ7		I20L2_HUMAN	Q9H9L3		ARRS_HUMAN	P10523		DOCK10	Q96BY6		P13647				Q16280			Q6NZY4	P13647	Q9UM54
	EFNA1	P20827		PMGE_HUMAN	P07738		ISL1_HUMAN	P61371		RBX2_HUMAN	Q9UBF6		DOCK2	Q92608		P02538				Q16281				P02538	B2RTY4
	EFNB1	P98172		BPHL_HUMAN	Q86WA6		ISL2_HUMAN	Q96A47		SALL1_HUMAN	Q9NSC2		DOCK4	Q8N1I0		P08729				Q9NQW8				P08729	Q8IZQ8
	EFNB2	P52799		BPI_HUMAN	P17213		ISLR_HUMAN	O14498		SALL2_HUMAN	Q9Y467		DOCK9	Q9BZ29		Q3SY84				Q6PI25				Q3SY84	P15173
	EFR3A	Q14156		BPIA1_HUMAN	Q9NP55		ISOC2_HUMAN	Q96AB3		SALL3_HUMAN	Q9BXA9		DOK1	Q99704		O95678				Q969H4				O95678	Q01538
	EGF	P01133		BPIA2_HUMAN	Q96DR5		IST1_HUMAN	P53990		SALL4_HUMAN	Q9UJQ4		DOK7	Q18PE1		Q01546				Q8WXI2				Q01546	P28698
	EGFR	P00533		BPIA3_HUMAN	Q9BQP9		ISY1_HUMAN	Q9ULR0		SAM10_HUMAN	Q9BYL1		DONSON	Q9NYP3		Q7Z794				P51911				Q7Z794	Q5VZE5
	EHBP1L1	Q8N3D4		BPIB1_HUMAN	Q8TDL5		ITCH_HUMAN	Q96J02		SAM14_HUMAN	Q8IZD0		DOT1L	Q8TEK3		Q8N1N4				Q9NRU3				Q8N1N4	Q9UQQ1
	EHD1	Q9H4M9		BPIB2_HUMAN	Q8N4F0		TIP_HUMAN	Q8TB96		SMAG1_HUMAN	Q9UPU9		DPEP2	Q9H4A9		P05787				Q9NZN8				P05787	Q15742
	EHD2	Q9NZN4		BPIB3_HUMAN	P59826		ITA1_HUMAN	P56199		SMAG2_HUMAN	Q5PRF9		DPF2	Q92785		Q6KB66				O75175				Q6KB66	Q13765
	EHD3	Q9NZN3		BPIB4_HUMAN	P59827		ITA10_HUMAN	O75578		SAMD8_HUMAN	Q96LT4		DPM1	O60762		Q14533				O95628				Q14533	O43776
	EHD4	Q9H223		BPIB6_HUMAN	Q8NFQ5		ITA11_HUMAN	Q9UKX5		SAMD9_HUMAN	Q5K651		DPP3	Q9NY33		Q9NSB4				Q9ULM6				Q9NSB4	Q9H0A0
	EIF2B1	Q14232		BPIFC_HUMAN	Q8NFQ6		ITA2_HUMAN	P17301		SAM9L_HUMAN	Q8IVG5		DPP4	P27487		Q9NSB2				Q9UIV1				Q9NSB2	Q8NFP9
	EIF2S1	P05198		BPTF_HUMAN	Q12830		ITA2B_HUMAN	P08514		SAMH1_HUMAN	Q9Y3Z3		DPP7	Q9UHL4		P78386				P21554				P78386	Q15021
	EIF3B	P55884		BRAF_HUMAN	P15056		ITA3_HUMAN	P26006		SAM50_HUMAN	Q9Y512		DPP8	Q6V1X1		P35527				P34972				P35527	P42695
	EIF3E	P60228		BRAP_HUMAN	Q7Z569		ITA4_HUMAN	P13612		SAMN1_HUMAN	Q9NSI8		DPYSL2	Q16555		Q52LG2				P78357				Q52LG2	P19878
	EIF3F	O00303		BRCA1_HUMAN	P38398		ITA5_HUMAN	P08648		SAP30_HUMAN	O75446		DPYSL4	O14531		P60985				Q9BZ76				P60985	Q9Y6Q9
	EIF3G	O75821		BRCA2_HUMAN	P51587		ITA6_HUMAN	P23229		SP30L_HUMAN	Q9HAJ7		DPYSL5	Q9BPU6		Q16719				Q5JTJ3				Q16719	O75376
	EIF3H	O15372		BRCC3_HUMAN	P46736		ITA7_HUMAN	Q13683		SAR1A_HUMAN	Q9NR31		DRG1	Q9Y295		P32004				Q53SF7				P32004	Q9Y618
	EIF3I	Q13347		BRD1_HUMAN	O95696		ITA8_HUMAN	P53708		SAR1B_HUMAN	Q9Y6B6		DRG2	P55039		Q9GZZ8				Q8WTW3				Q9GZZ8	Q99608
	EIF3J	O75822		BRD2_HUMAN	P25440		ITA9_HUMAN	Q13797		SARDH_HUMAN	Q9UL12		DSC1	Q08554		P24043				Q96JB2				P24043	Q86Y39
	EIF3L	Q9Y262		BRD3_HUMAN	Q15059		ITAD_HUMAN	Q13349		SARNP_HUMAN	P82979		DSC2	Q02487		Q16363				Q9H9E3				Q16363	Q16795
	EIF3M	Q7L2H7		BRD4_HUMAN	O60885		ITAE_HUMAN	P38570		SYSC_HUMAN	P49591		DSC3	Q14574		O15230				Q9Y2V7				O15230	O95169
	EIF4A1	P60842		BRD7_HUMAN	Q9NPI1		ITAL_HUMAN	P20701		SYSM_HUMAN	Q9NP81		DSCAM	O60469		P07942				P83436				P07942	O95298
	EIF4A2	Q14240		BRD8_HUMAN	Q9H0E9		ITAM_HUMAN	P11215		SNUT1_HUMAN	O43290		DSCR3	O14972		P55268				P38432				P55268	O75489
	EIF4A3	P38919		TF3B_HUMAN	Q92994		ITAV_HUMAN	P06756		SART3_HUMAN	Q15020		DSG1	Q02413		Q13751				Q9P218				Q13751	O75251
	EIF4B	P23588		FANCJ_HUMAN	Q9BX63		ITAX_HUMAN	P20702		SASH1_HUMAN	O94885		DSG2	Q14126		P11047				Q96A83				P11047	P56181
	EIF4E	P06730		RM36_HUMAN	Q9P0J6		ITB1_HUMAN	P05556		SASH3_HUMAN	O75995		DSG3	P32926		Q9Y6N6				Q2UY09				Q9Y6N6	Q14511
	EIF4G1	Q04637		BRX1_HUMAN	Q8TDN6		ITBP1_HUMAN	O14713		SAS6_HUMAN	Q6UVJ0		DSN1	Q9H410		P11279				P02458				P11279	P07197
	EIF4G2	P78344		BRK1_HUMAN	Q8WUW1		ITBP2_HUMAN	Q9UKP3		SAT2_HUMAN	Q96F10		DSP	P15924		P13473				Q9Y5P4				P13473	Q96FI4
	EIF4H	Q15056		BRM1L_HUMAN	Q5PSV4		ITB2_HUMAN	P05107		S38A2_HUMAN	Q96QD8		DST	Q03001		O43504				P29400				O43504	Q8TAT5
	EIF5	P55010		BRPF1_HUMAN	P55201		ITB3_HUMAN	P05106		SATB1_HUMAN	Q01826		DSTN	P60981		P28838				Q14031				P28838	P51957
	EIF5B	O60841		BRPF3_HUMAN	Q9ULD4		CENPR_HUMAN	Q13352		SATB2_HUMAN	Q9UPW6		DTNA	Q9Y4J8		Q9P2J5				Q02388				Q9P2J5	Q9H3P2
	EIF6	P56537		BRS3_HUMAN	P32247		ITB4_HUMAN	P16144		SAV1_HUMAN	Q9H4B6		DTNB	O60941		Q14847				P25067				Q14847	O60524
	ELANE	P08246		BRSK1_HUMAN	Q8TDC3		ITB5_HUMAN	P18084		SBDS_HUMAN	Q9Y3A5		DUSP14	O95147		O43561				P20849				O43561	P23975
	ELAVL1	Q15717		BRSK2_HUMAN	Q8IWQ3		ITB6_HUMAN	P18564		MTMR5_HUMAN	O95248		DUSP3	P51452		P18428				Q14050				P18428	Q7Z628
	ELFN1	P0C7U0		BRWD1_HUMAN	Q9NSI6		ITB7_HUMAN	P26010		SBSN_HUMAN	Q6UWP8		DUSP4	Q13115		P04180				Q9Y215				P04180	Q9Y345
	ELMO1	Q92556		BASI_HUMAN	P35613		ITIH1_HUMAN	P19827		SC5D_HUMAN	O75845		DUSP6	Q16828		P31025				Q8N668				P31025	Q92886
	ELN	P15502		BSN_HUMAN	Q9UPA5		ITIH2_HUMAN	P19823		SFR19_HUMAN	Q9H7N4		DVL1	O14640		P80188				Q9Y6G5				P80188	Q9Y4Z2
	ELOC	Q15369		BSND_HUMAN	Q8WZ55		ITIH3_HUMAN	Q06033		SFR15_HUMAN	O95104		DYNC1H1	Q14204		P13796				Q9UBI1				P13796	P21359
	EMC1	Q8N766		BST1_HUMAN	Q10588		ITIH4_HUMAN	Q14624		SCAF8_HUMAN	Q9UPN6		DYNLL1	P63167		O75112				Q9H0A8				O75112	P35240
	EMD	P50402		BST2_HUMAN	Q10589		ITIH5_HUMAN	Q86UX2		SCAM1_HUMAN	O15126		DYNLRB1	Q9NP97		P00338				Q9GZQ3				P00338	Q14494
	EMILIN1	Q9Y6C2		BTAF1_HUMAN	O14981		ITK_HUMAN	Q08881		SCAM3_HUMAN	O14828		DYRK2	Q92630		P07195				Q86VX2				P07195	Q9Y4A8
	EMILIN2	Q9BXX0		BTBDA_HUMAN	Q9BSF8		ITLN1_HUMAN	Q8WWA0		SCAM5_HUMAN	Q8TAC9		E2F1	Q01094		P01130				Q9NX08				P01130	P19838
	EMILIN3	Q9NT22		BTBD3_HUMAN	Q9Y2F9		ITLN2_HUMAN	Q8WWU7		SCND1_HUMAN	P57086		E2F2	Q14209		Q969E1				Q9P000				Q969E1	Q12986
	EML2	O95834		BTBD6_HUMAN	Q96KE9		ITM2A_HUMAN	O43736		SCND3_HUMAN	Q6R2W3		E2F6	O75461		O14960				Q9P299				O14960	P01138
	EML4	Q9HC35		BTBD9_HUMAN	Q96Q07		ITM2B_HUMAN	Q9Y287		SCAP_HUMAN	Q12770		ECE1	P42892		P41159				Q9NZJ6				P41159	Q6T4R5
	ENAH	Q8N8S7		BTD_HUMAN	P43251		ITM2C_HUMAN	Q9NQX7		SCAPE_HUMAN	Q9BY12		ECHDC1	Q9NTX5		P48357				Q9Y2Z9				P48357	Q8N4C6
	ENDOD1	O94919		BTF3_HUMAN	P20290		ITPA_HUMAN	Q9BY32		SCRB2_HUMAN	Q14108		ECHS1	P30084		P09382				Q99807				P09382	Q6KC79
	ENG	P17813		BTG2_HUMAN	P78543		ITPK1_HUMAN	Q13572		SREC_HUMAN	Q14162		ECI1	P42126		P17931				Q92828				P17931	Q9BPW8
	ENO1	P06733		BTG3_HUMAN	Q14201		IP3KA_HUMAN	P23677		SREC2_HUMAN	Q96GP6		ECM1	Q16610		Q08380				O00230				Q08380	O15522
	ENO2	P09104		BTG4_HUMAN	Q9NY30		IP3KB_HUMAN	P27987		ACOD_HUMAN	O00767		ECM2	O94769		P56470				Q12887				P56470	Q7RTR2
	ENO3	P13929		BTK_HUMAN	Q06187		IP3KC_HUMAN	Q96DU7		SCEL_HUMAN	O95171		EDAR	Q9UNE0		P47929				Q9Y6N1				P47929	Q9NPP4
	ENOPH1	Q9UHY7		BT1A1_HUMAN	Q13410		ITPR1_HUMAN	Q14643		SCFD1_HUMAN	Q8WVM8		EDEM1	Q92611		Q3ZCW2				Q7KZN9				Q3ZCW2	Q9C000
	ENPEP	Q07075		BT2A2_HUMAN	Q8WVV5		ITPR2_HUMAN	Q14571		SCFD2_HUMAN	Q8WU76		EDN1	P05305		P42702				Q8N8Q8				P42702	Q86W26
	ENPP1	P22413		BT3A1_HUMAN	O00481		ITPR3_HUMAN	Q14573		MEN1_HUMAN	O00255		EEA1	Q15075		Q8N149				P35354				Q8N149	Q86W24
	ENPP2	Q13822		BT3A2_HUMAN	P78410		ITSN1_HUMAN	Q15811		SCG2_HUMAN	P13521		EEF1A1	P68104		O75023				Q8TF08				O75023	P59044
	ENPP3	O14638		BT3A3_HUMAN	O00478		ITSN2_HUMAN	Q9NZM3		SCG3_HUMAN	Q8WXD2		EEF1A2	Q05639		P48059				P15954				P48059	P28336
	ENPP5	Q9UJA9		BTNL2_HUMAN	Q9UIR0		IVD_HUMAN	P26440		7B2_HUMAN	P05408		EEF1B2	P24534		Q9Y5X9				Q7Z4L0				Q9Y5X9	O00746
	ENPP6	Q6UWR7		BTNL8_HUMAN	Q6UX41		INVO_HUMAN	P07476		UTER_HUMAN	P11684		EEF1D	P29692		P02545				Q8WXQ8				P02545	Q15155
	ENPP7	Q6UWV6		BTNL9_HUMAN	Q6UXG8		IWS1_HUMAN	Q96ST2		SG1D2_HUMAN	O95969		EEF1G	P26641		P20700				Q8N4T0				P20700	P78316
	ENSA	O43768		BUB1_HUMAN	O43683		JAG1_HUMAN	P78504		SG3A1_HUMAN	Q96QR1		EEF2	P13639		Q03252				Q8NE35				Q03252	P46087
	ENTPD1	P49961		BUB1B_HUMAN	O60566		JAG2_HUMAN	Q9Y219		SG3A2_HUMAN	Q96PL1		EFEMP1	Q12805		P28300				O14810				P28300	O00567
	ENTPD4	Q9Y227		BUB3_HUMAN	O43684		JAK1_HUMAN	P23458		SEGN_HUMAN	O76038		EFEMP2	O95967		Q08397				Q96FN4				Q08397	Q9Y2X3
	ENTPD5	O75356		BUD31_HUMAN	P41223		JAK2_HUMAN	O60674		ADSV_HUMAN	Q9Y6U3		EFNB1	P98172		P58215				Q96A23				P58215	Q86U38
	ENTPD6	O75354		POPD1_HUMAN	Q8NE79		JAK3_HUMAN	P52333		SCML2_HUMAN	Q9UQR0		EFNB2	P52799		P08519				Q9UBL6				P08519	P29475
	ENTPD7	Q9NQZ7		BYST_HUMAN	Q13895		JKIP2_HUMAN	Q96AA8		SCNAA_HUMAN	Q9Y5Y9		EFS	O43281		P06858				Q86YQ8				P06858	P35228
	EPB41	P11171		RIMB1_HUMAN	O95153		JAM2_HUMAN	P57087		SCNBA_HUMAN	Q9UI33		EFTUD2	Q15029		Q93052				Q92523				Q93052	P29474
	EPB41L2	O43491		BZW1_HUMAN	Q7L1Q6		JARD2_HUMAN	Q92833		SCN1A_HUMAN	P35498		EGF	P01133		P50851				Q8TCG5				P50851	Q9Y5S8
	EPB41L3	Q9Y2J2		LRMDA_HUMAN	Q9H2I8		JAZF1_HUMAN	Q86VZ6		SCN1B_HUMAN	Q07699		EGFR	P00533		P02750				Q96SM3				P02750	O60500
	EPB42	P16452		LCOR_HUMAN	Q96JN0		KDM7A_HUMAN	Q6ZMT4		SCN2A_HUMAN	Q99250		EGLN1	Q9GZT9		Q07954				Q8N436				Q07954	P16860
	EPCAM	P16422		EMSY_HUMAN	Q7Z589		JKAMP_HUMAN	Q9P055		SCN2B_HUMAN	O60939		EGLN2	Q96KS0		Q9NZR2				P29373				Q9NZR2	Q12980
	EPHA1	P21709		CK045_HUMAN	Q8TAV5		JOS1_HUMAN	Q15040		SCN3A_HUMAN	Q9NY46		EGR1	P18146		O75581				P78560				O75581	P01303
	EPHA4	P54764		CK054_HUMAN	Q9H0W9		JPH1_HUMAN	Q9HDC5		SCN3B_HUMAN	Q9NY72		EHBP1	Q8NDI1		Q8TF66				Q96SW2				Q8TF66	P51843
	EPHA7	Q15375		UQCC3_HUMAN	Q6UW78		JPH2_HUMAN	Q9BR39		SCN4A_HUMAN	P35499		EHD1	Q9H4M9		Q32MZ4				O75575				Q32MZ4	Q13133
	EPHB2	P29323		CL056_HUMAN	Q8IXR9		JPH3_HUMAN	Q8WXH2		SCN5A_HUMAN	Q14524		EHD3	Q9NZN3		Q13449				Q9UGL9				Q13449	O75469
	EPHB3	P54753		C10_HUMAN	Q99622		JPH4_HUMAN	Q96JJ6		SCN7A_HUMAN	Q01118		EHD4	Q9H223		Q9Y333				P16220				Q9Y333	P13056
	EPHB4	P54760		CL060_HUMAN	Q5U649		JERKL_HUMAN	Q9Y4A0		SCN8A_HUMAN	Q9UQD0		EHHADH	Q08426		P09960				Q70SY1				P09960	P49116
	EPHB6	O15197		ERG28_HUMAN	Q9UKR5		JTB_HUMAN	O76095		SCN9A_HUMAN	Q15858		EHMT1	Q9H9B1		Q14766				Q8TEY5				Q14766	P04150
	EPHX1	P07099		GLUCM_HUMAN	Q7Z3D6		JUN_HUMAN	P05412		SCNNA_HUMAN	P37088		EHMT2	Q96KQ7		Q14767				Q02930				Q14767	Q86VF7
	EPHX2	P34913		CN166_HUMAN	Q9Y224		JUNB_HUMAN	P17275		SCNNB_HUMAN	P51168		EIF1	P41567		Q8N2S1				Q8IUH2				Q8N2S1	O43847
	EPN1	Q9Y6I3		LR74A_HUMAN	Q0VAA2		JUND_HUMAN	P17535		SCNND_HUMAN	P51172		EIF2A	Q9BY44		P02788				Q03060				P02788	Q9H7Z3
	EPPK1	P58107		68MP_HUMAN	P56378		PLAK_HUMAN	P14923		SCO2_HUMAN	O43819		EIF2B5	Q13144		P51884				P34998				P51884	Q02297
	EPRS	P07814		S6OS1_HUMAN	Q8N1H7		KALM_HUMAN	P23352		SCOC_HUMAN	Q9UIL1		EIF2S1	P05198		Q14210				Q13324				Q14210	P56975
	EPS15	P42566		CN093_HUMAN	Q9H972		KALRN_HUMAN	O60229		CTDS2_HUMAN	O14595		EIF2S2	P20042		O75608				P16562				O75608	P48552
	EPS15L1	Q9UBC2		TM266_HUMAN	Q2M3C6		KANK1_HUMAN	Q14678		NLTP_HUMAN	P22307		EIF2S3	P41091		Q9Y5Y7				O75462				Q9Y5Y7	Q9HDB5
	ERAP1	Q9NZ08		GAAS1_HUMAN	O95177		KANL1_HUMAN	Q7Z3B3		SYCP2_HUMAN	Q9BX26		EIF3B	P55884		P61626				Q9HC73				P61626	O95478
	ERAP2	Q6P179		CP071_HUMAN	Q8IYS4		KAL1L_HUMAN	A0AUZ9		SCRIB_HUMAN	Q14160		EIF3C	Q99613		Q9UNF1				Q9UJA2				Q9UNF1	Q96L73
	ERBB2	P04626		TNT_HUMAN	Q7Z2V1		KANL3_HUMAN	Q9P2N6		SCRN1_HUMAN	Q12765		EIF3D	O15371		P33908				Q14194				P33908	Q96P26
	ERBB3	P21860		CP089_HUMAN	Q6UX73		SYK_HUMAN	Q15046		SCRN2_HUMAN	Q96FV2		EIF3G	O75821		O60476				O75718				O60476	P49902
	ERBB4	Q15303		NJMU_HUMAN	Q9HAS0		KAT2B_HUMAN	Q92831		SCRN3_HUMAN	Q0VDG4		EIF3J	O75822		Q9UKM7				O43186				Q9UKM7	O60285
	ERBIN	Q96RT1		NCBP3_HUMAN	Q53F19		KAT5_HUMAN	Q92993		SCRT1_HUMAN	Q9BWW7		EIF4A1	P60842		Q16706				Q49AN0				Q16706	Q9H1E3
	ERH	P84090		MIC1_HUMAN	Q96DM3		KAT6A_HUMAN	Q92794		SCRT2_HUMAN	Q9NQ03		EIF4A2	Q14240		P49641				P43320				P49641	Q9BZD4
	ERO1A	Q96HE7		MYDGF_HUMAN	Q969H8		KAT7_HUMAN	O95251		SCTR_HUMAN	P47872		EIF4A3	P38919		O00754				P26998				O00754	Q9Y6R0
	ERP29	P30040		IMUP_HUMAN	Q9GZP8		KAT8_HUMAN	Q9H7Z6		SDA1_HUMAN	Q9NVU7		EIF4E	P06730		Q9Y2E5				O95825				Q9Y2E5	Q8WUM0
	ERP44	Q9BS26		CS043_HUMAN	Q9BQ61		KATL1_HUMAN	Q9BW62		SDC1_HUMAN	P18827		EIF4ENIF1	Q9NRA8		O00462				P04141				O00462	O75694
	ERVMER34-1	Q9H9K5		ANGL8_HUMAN	Q6UXH0		KTNB1_HUMAN	Q9BVA0		SDC3_HUMAN	O75056		EIF4G1	Q04637		Q9H8J5				Q8TDX6				Q9H8J5	Q92621
	ESAM	Q96AP7		C1D_HUMAN	Q13901		KBTBB_HUMAN	O94819		SDC4_HUMAN	P31431		EIF4G2	P78344		P46821				Q8N6G5				P46821	Q9UKX7
	ESD	P10768		C1GLT_HUMAN	Q9NS00		KBTB2_HUMAN	Q8IY47		SDCB1_HUMAN	O00560		EIF4G3	O43432		P27816				Q96PZ7				P27816	Q7Z3B4
	ESM1	Q9NQ30		C1GLC_HUMAN	Q96EU7		KBTB3_HUMAN	Q8NAB2		SDCB2_HUMAN	Q9H190		EIF4H	Q15056		P28482				Q7Z407				P28482	Q99567
	ESYT1	Q9BSJ8		KDF1_HUMAN	Q8NAX2		KBTB4_HUMAN	Q9NVX7		SDCG8_HUMAN	Q86SQ7		EIF5A	P63241		Q15691				P05814				Q15691	Q8N1F7
	ESYT2	A0FGR8		CC185_HUMAN	Q8N715		KBTB6_HUMAN	Q86V97		SDE2_HUMAN	Q6IQ49		EIF5B	O60841		Q15555				Q8N752				Q15555	P52948
	ETF1	P62495		CA087_HUMAN	Q8N0U7		KCNA1_HUMAN	Q09470		SDF2L_HUMAN	Q9HCN8		EIF6	P56537		P10636				P49674				P10636	P29728
	ETFA	P13804		C1QA_HUMAN	P02745		KCNA2_HUMAN	P16389		CAB45_HUMAN	Q9BRK5		ELAC2	Q9BQ52		P29966				Q9HCP0				P29966	P54368
	ETFB	P38117		C1QB_HUMAN	P02746		KCNA3_HUMAN	P22001		SDHA_HUMAN	P31040		ELANE	P08246		Q9UEW3				P19784				Q9UEW3	Q5VST9
	ETHE1	O95571		C1QBP_HUMAN	Q07021		KCNA4_HUMAN	P22459		SDHB_HUMAN	P21912		ELAVL1	Q15717		P48740				Q96S65				P48740	P11926
	EWSR1	Q01844		C1QC_HUMAN	P02747		KCNA5_HUMAN	P22460		DHSD_HUMAN	O14521		ELK3	P41970		O00187				Q8WYN3				O00187	O75665
	EXOC2	Q96KP1		C1QRF_HUMAN	O75973		KCNA6_HUMAN	P17658		CAVN2_HUMAN	O95810		ELN	P15502		Q00266				Q16527				Q00266	O15527
	EXOC4	Q96A65		C1QT1_HUMAN	Q9BXJ1		KCAB1_HUMAN	Q14722		SDHL_HUMAN	P20132		ELOA	Q14241		P31153				Q9H8E8				P31153	P23515
	EXT1	Q16394		C1QT2_HUMAN	Q9BXJ5		KCAB3_HUMAN	O43448		SC11A_HUMAN	P67812		ELOA3	Q8NG57		P43243				Q05048				P43243	O60890
	EXT2	Q93063		C1QT3_HUMAN	Q9BXJ4		KCNB1_HUMAN	Q14721		SC11C_HUMAN	Q9BY50		ELOC	Q15369		P02144				Q12996				P02144	Q8NGV0
	EXTL1	Q92935		C1QT4_HUMAN	Q9BXJ3		KCNB2_HUMAN	Q92953		SEC13_HUMAN	P55735		EMG1	Q92979		P11226				Q9H114				P11226	P47893
	EXTL2	Q9UBQ6		C1QT5_HUMAN	Q9BXJ0		KCNC1_HUMAN	P48547		S14L1_HUMAN	Q92503		EMILIN2	Q9BXX0		P43121				P78358				P43121	Q9H255
	EZR	P15311		C1QT6_HUMAN	Q9BXI9		KCNC2_HUMAN	Q96PR1		S14L2_HUMAN	O76054		EMSY	Q7Z589		Q8NI22				O75638				Q8NI22	Q8NH61
	F10	P00742		C1QT7_HUMAN	Q9BXJ2		KCNC3_HUMAN	Q14003		S14L3_HUMAN	Q9UDX4		ENDOD1	O94919		P49736				Q96RT6				P49736	Q8NGP2
	F11	P03951		C1QT8_HUMAN	P60827		KCNC4_HUMAN	Q03721		S14L4_HUMAN	Q9UDX3		ENDOG	Q14249		P25205				Q9HC47				P25205	Q8NGQ5
	F11R	Q9Y624		C1R_HUMAN	P00736		KCND1_HUMAN	Q9NSA2		SC16A_HUMAN	O15027		ENG	P17813		P40925				Q86UF2				P40925	Q9H4L5
	F12	P00748		C1RL_HUMAN	Q9NZP8		KCND2_HUMAN	Q9NZV8		SC22B_HUMAN	O75396		ENO1	P06733		P40926				P49711				P40926	Q9H0X9
	F13A1	P00488		C1S_HUMAN	P09871		KCNE1_HUMAN	P15382		SC23A_HUMAN	Q15436		ENO2	P09104		P48163				Q8NI51				P48163	Q9BZF3
	F13B	P05160		CO2_HUMAN	P06681		KCNE5_HUMAN	Q9UJ90		SC23B_HUMAN	Q15437		ENO3	P13929		P23368				Q9Y5B0				P23368	Q96SU4
	F2	P00734		NOL4L_HUMAN	Q96MY1		KCNE2_HUMAN	Q9Y6J6		SC24A_HUMAN	O95486		ENPEP	Q07075		Q15648				O14595				Q15648	P13725
	F5	P12259		CT144_HUMAN	Q9BQM9		KCNE4_HUMAN	Q8WWG9		SC24B_HUMAN	O95487		ENPP2	Q13822		Q7Z7M0				Q16619				Q7Z7M0	Q9HC10
	F7	P08709		CT024_HUMAN	Q9BUV8		KCNF1_HUMAN	Q9H3M0		SC24C_HUMAN	P53992		ENSA	O43768		Q9H1U4				O43310				Q9H1U4	Q12889
	F8	P00451		CFA61_HUMAN	Q8NHU2		KCNG1_HUMAN	Q9UIX4		SC24D_HUMAN	O94855		ENTPD5	O75356		P08582				Q9UBT7				P08582	P01178
	F8A1	P23610		CT096_HUMAN	Q9NUD7		KCNG2_HUMAN	Q9UJ96		SC31A_HUMAN	O94979		EP400	Q96L91		Q16819				Q9NSA3				Q16819	P13674
	F9	P00740		CU002_HUMAN	O43822		KCNG4_HUMAN	Q8TDN1		S61A2_HUMAN	Q9H9S3		EPAS1	Q99814		Q12866				Q8WYA6				Q12866	Q86U42
	FABP1	P07148		ES1_HUMAN	P30042		KCNH1_HUMAN	O95259		SC61G_HUMAN	P60059		EPB41	P11171		P08581				Q9UQB3				P08581	Q6VY07
	FABP2	P12104		CU058_HUMAN	P58505		KCNH2_HUMAN	Q12809		SEC63_HUMAN	Q9UGP8		EPB41L2	O43491		P53582				P17812				P53582	Q9BY11
	FABP3	P05413		CU059_HUMAN	P57076		KCNH3_HUMAN	Q9ULD8		SEBP2_HUMAN	Q96T21		EPB41L3	Q9Y2J2		P50579				Q99895				P50579	Q9UKS6
	FABP4	P15090		EURL_HUMAN	Q9NYK6		KCNH4_HUMAN	Q9UQ05		SBP2L_HUMAN	Q93073		EPB42	P16452		P55083				Q7Z7A3				P55083	Q9NQU5
	FABP5	Q01469		C2C2L_HUMAN	O14523		KCNH5_HUMAN	Q8NCM2		SCTM1_HUMAN	Q8WVN6		EPCAM	P16422		Q13361				P60606				Q13361	Q9P286
	FABP6	P51161		AUGN_HUMAN	Q9H1Z8		KCNH6_HUMAN	Q9H252		SEH1_HUMAN	Q96EE3		EPHA1	P21709		O00587				Q9NWM3				O00587	Q9BZ23
	FAH	P16930		ASHWN_HUMAN	Q9BVC5		KCNH7_HUMAN	Q9NS40		SE1L1_HUMAN	Q9UBV2		EPHA4	P54764		O43451				Q13617				O43451	Q8NDF8
	FAM129A	Q9BZQ8		CB050_HUMAN	Q96LR7		KCNH8_HUMAN	Q96L42		LYAM2_HUMAN	P16581		EPHA7	Q15375		P26572				Q13619				P26572	P51003
	FAM129B	Q96TA1		CO3_HUMAN	P01024		CSEN_HUMAN	Q9Y2W7		SBP1_HUMAN	Q13228		EPHB2	P29323		Q5JRA6				Q93034				Q5JRA6	Q9NRJ5
	FAM162A	Q96A26		C3AR_HUMAN	Q16581		KCNJ1_HUMAN	P48048		LYAM1_HUMAN	P14151		EPHB4	P54760		P14174				Q14999				P14174	Q8TEW0
	FAM171A1	Q5VUB5		CC020_HUMAN	Q8ND61		KCJ10_HUMAN	P78508		SELM_HUMAN	Q8WWX9		EPHX2	P34913		Q9UNW1				Q9NTM9				Q9UNW1	Q8TEW8
	FAM177A1	Q8N128		GR6_HUMAN	O15544		KCJ14_HUMAN	Q9UNX9		SELO_HUMAN	Q9BVL4		EPN1	Q9Y6I3		Q14165				P39880				Q14165	Q9NPB6
	FAM198A	Q9UFP1		HMCES_HUMAN	Q96FZ2		KCJ15_HUMAN	Q99712		LYAM3_HUMAN	P16109		EPRS	P07814		P08473				Q13948				P08473	Q86W56
	FAM20A	Q96MK3		DIA1_HUMAN	Q8NDZ4		KCNJ2_HUMAN	P63252		SEPP1_HUMAN	P49908		EPS15	P42566		P03956				Q9P013				P03956	Q9H0J9
	FAM20B	O75063		CC070_HUMAN	A6NLC5		KCNJ3_HUMAN	P48549		SELPL_HUMAN	Q14242		EPS15L1	Q9UBC2		P50281				Q6UX04				P50281	Q460N5
	FAM20C	Q8IXL6		CO4A_HUMAN	P0C0L4		KCNJ5_HUMAN	P48544		SELT_HUMAN	P62341		EPS8	Q12929		P08253				Q69YN2				P08253	Q8IXQ6
	FAM234A	Q9H0X4		CO4B_HUMAN	P0C0L5		KCNJ9_HUMAN	Q92806		SELV_HUMAN	P59797		EPYC	Q99645		P08254				Q9H720				P08254	Q9Y5B6
	FAM26D	Q5JW98		C4BPA_HUMAN	P04003		KCNKA_HUMAN	P57789		SEM3A_HUMAN	Q14563		ERAP1	Q9NZ08		P22894				O43927				P22894	Q96KB5
	FAM3B	P58499		C4BPB_HUMAN	P20851		KCNKC_HUMAN	Q9HB15		SEM3B_HUMAN	Q13214		ERBB2	P04626		P14780				P80162				P14780	P40425
	FAM3C	Q92520		ZGRF1_HUMAN	Q86YA3		KCNKD_HUMAN	Q9HB14		SEM3C_HUMAN	Q99985		ERBB3	P21860		Q13201				P61073				Q13201	Q9BYU1
	FAM3D	Q96BQ1		ABD18_HUMAN	Q0P651		KCNKF_HUMAN	Q9H427		SEM3D_HUMAN	O95025		ERBB4	Q15303		Q9H8L6				P32302				Q9H8L6	P57721
	FAM49B	Q9NUQ9		CD036_HUMAN	Q96KX1		KCNKI_HUMAN	Q7Z418		SEM3E_HUMAN	O15041		ERC2	O15083		P05164				Q9P0U4				P05164	O60245
	FAP	Q12884		CO5_HUMAN	P01031		KCNK2_HUMAN	O95069		SEM3F_HUMAN	Q13275		ERCC3	P19447		P25325				Q9H2H0				P25325	O95206
	FARP1	Q9Y4F1		C5AR1_HUMAN	P21730		KCAB2_HUMAN	Q13303		SEM4B_HUMAN	Q9NPR2		ERCC4	Q92889		P22897				P49447				P22897	Q9Y5H5
	FARSA	Q9Y285		C5AR2_HUMAN	Q9P296		KCNK3_HUMAN	O14649		SEM4C_HUMAN	Q9C0C4		ERCC5	P28715		Q13421				P13498				Q13421	Q9Y5F0
	FAS	P25445		CO6_HUMAN	P13671		KCNK5_HUMAN	O95279		SEM4D_HUMAN	Q92854		ERCC6	Q03468		P26038				Q8WWM9				P26038	Q9Y5E7
	FASN	P49327		CF010_HUMAN	Q5SRN2		KCNK7_HUMAN	Q9Y2U2		SEM4F_HUMAN	O95754		ERGIC2	Q96RQ1		P21757				P35663				P21757	Q9Y5E2
	FAT1	Q14517		CF118_HUMAN	Q5T5N4		KCNK9_HUMAN	Q9NPC2		SEM4G_HUMAN	Q9NTN9		ERN1	O75460		Q13126				Q14093				Q13126	Q9Y5H2
	FAT4	Q6V0I7		CF206_HUMAN	Q8IYR0		KCMA1_HUMAN	Q12791		SEM5A_HUMAN	Q13591		ERO1A	Q96HE7		P11586				Q9NQC7				P11586	O60330
	FBL	P22087		G6B_HUMAN	O95866		KCMB1_HUMAN	Q16558		SEM5B_HUMAN	Q9P283		ERP29	P30040		P58546				P05108				P58546	Q9Y5H1
	FBLN1	P23142		G8_HUMAN	Q9UBA6		KCMB2_HUMAN	Q9Y691		SEM6A_HUMAN	Q9H2E6		ERP44	Q9BS26		O43312				P15538				O43312	Q9Y5G8
	FBLN2	P98095		CF062_HUMAN	Q9GZU0		KCMB3_HUMAN	Q9NPA1		SEM6B_HUMAN	Q9H3T3		ESAM	Q96AP7		Q9HC84				P11511				Q9HC84	Q9Y5G1
	FBLN5	Q9UBX5		CF089_HUMAN	Q6UWU4		KCNN1_HUMAN	Q92952		SEM6C_HUMAN	Q9H3T2		ESCO1	Q5FWF5		P22033				P05177				P22033	O94913
	FBLN7	Q53RD9		CO7_HUMAN	P10643		KCNN2_HUMAN	Q9H2S1		SEM6D_HUMAN	Q8NFY4		ESD	P10768		P53602				Q16678				P53602	Q9H4Z3
	FBN1	P35555		CG025_HUMAN	Q9BPX7		KCNN3_HUMAN	Q9UGI6		SEM7A_HUMAN	O75326		ESYT2	A0FGR8		Q14896				Q07973				Q14896	Q9Y6V0
	FBN2	P35556		MTURN_HUMAN	Q8N3F0		KCNN4_HUMAN	O15554		SEMG1_HUMAN	P04279		ETF1	P62495		Q969H8				O43174				Q969H8	P12004
	FBP1	P09467		CG043_HUMAN	Q8WVR3		KCNQ1_HUMAN	P51787		SEMG2_HUMAN	Q02383		ETFA	P13804		P12882				Q9NR63				P12882	O95613
	FBXO7	Q9Y3I1		CO8A_HUMAN	P07357		KCNQ2_HUMAN	O43526		SENP1_HUMAN	Q9P0U3		ETFB	P38117		P35580				Q02318				P35580	Q92729
	FCAMR	Q8WWV6		CO8B_HUMAN	P07358		KCNQ3_HUMAN	O43525		SENP2_HUMAN	Q9HC62		ETFDH	Q16134		P35749				O15528				P35749	Q92824
	FCER1G	P30273		CO8G_HUMAN	P07360		KCNQ4_HUMAN	P56696		SENP3_HUMAN	Q9H4L4		ETS1	P14921		Q7Z406				Q16696				Q7Z406	Q14690
	FCER2	P06734		CO9_HUMAN	P02748		KCNQ5_HUMAN	Q9NR82		SENP5_HUMAN	Q96HI0		ETV3	P41162		Q9UKX2				P11712				Q9UKX2	Q01064
	FCGBP	Q9Y6R7		CI016_HUMAN	Q9BUW7		KCNS1_HUMAN	Q96KK3		SENP6_HUMAN	Q9GZR1		EVL	Q9UI08		P11055				P24903				P11055	Q07343
	FCGR2A	P12318		AMPO_HUMAN	Q8N6M6		KCNS2_HUMAN	Q9ULS6		SENP7_HUMAN	Q9BQF6		EWSR1	Q01844		Q9Y623				P51589				Q9Y623	P16499
	FCGR3A	P08637		CI040_HUMAN	Q8IXQ3		KCNS3_HUMAN	Q9BQ31		SENP8_HUMAN	Q96LD8		EXOC4	Q96A65		P13533				Q96SQ9				P13533	Q9P0J1
	FCGRT	P55899		CAH1_HUMAN	P00915		KCP_HUMAN	Q6ZWJ8		SEP15_HUMAN	O60613		EXOC6	Q8TAG9		P12883				Q8TAV3				P12883	O15530
	FCMR	O60667		CAH10_HUMAN	Q9NS85		KCD11_HUMAN	Q693B1		SPS1_HUMAN	P49903		EXOSC1	Q9Y3B2		P35579				Q9NYL5				P35579	O00330
	FCN1	O00602		CAH11_HUMAN	O75493		KCD12_HUMAN	Q96CX2		SPS2_HUMAN	Q99611		EXOSC2	Q13868		P05976				P20815				P05976	Q9HAT8
	FCN2	Q15485		GKN1_HUMAN	Q9NS71		BACD1_HUMAN	Q8WZ19		SEPT1_HUMAN	Q8WYJ6		EXOSC4	Q9NPD3		P08590				P24462				P08590	Q8N2H9
	FCN3	O75636		CAH12_HUMAN	O43570		KCTD2_HUMAN	Q14681		SEP11_HUMAN	Q9NVA2		EXT2	Q93063		P12829				Q9Y6A2				P12829	O43933
	FCRL1	Q96LA6		CAH13_HUMAN	Q8N1Q1		KCTD4_HUMAN	Q8WVF5		SEPT2_HUMAN	Q15019		EXTL2	Q9UBQ6		P60660				Q02928				P60660	O60683
	FCRL5	Q96RD9		CAH2_HUMAN	P00918		KCTD5_HUMAN	Q9NXV2		SEPT3_HUMAN	Q9UH03		EYA2	O00167		Q15746				P13584				Q15746	P02776
	FDPS	P14324		CAH3_HUMAN	P07451		KCTD9_HUMAN	Q7L273		SEPT4_HUMAN	O43236		EZH2	Q15910		Q92614				Q9HCS2				Q92614	Q9NQP4
	FEN1	P39748		CAH4_HUMAN	P22748		KDM1A_HUMAN	O60341		SEPT6_HUMAN	Q14141		EZR	P15311		O00160				Q08477				O00160	Q16875
	FERMT2	Q96AC1		CAH5A_HUMAN	P35218		KDM1B_HUMAN	Q8NB78		SEPT7_HUMAN	Q16181		F10	P00742		Q99972				P98187				Q99972	P35080
	FERMT3	Q86UX7		CA5BL_HUMAN	Q8WTZ4		KDM2A_HUMAN	Q9Y2K7		SEPT8_HUMAN	Q92599		F11	P03951		Q9NZM1				Q86W10				Q9NZM1	Q6P3X8
	FETUB	Q9UGM5		CAH5B_HUMAN	Q9Y2D0		KDM2B_HUMAN	Q8NHM5		SEPT9_HUMAN	Q9UHD8		F11R	Q9Y624		Q9Y2G1				Q16850				Q9Y2G1	P49763
	FGA	P02671		CAH6_HUMAN	P23280		KDM3B_HUMAN	Q7LBC6		PAIRB_HUMAN	Q8NC51		F12	P00748		Q13564				P22680				Q13564	P53609
	FGB	P02675		CAH7_HUMAN	P43166		KDM4A_HUMAN	O75164		SRGEF_HUMAN	Q9UGK8		F13A1	P00488		P17050				O75881				P17050	P07205
	FGFBP2	Q9BYJ0		CAH9_HUMAN	Q16790		KDM4B_HUMAN	O94953		SEHL2_HUMAN	Q9H4I8		F13B	P05160		P54802				Q9UNU6				P54802	P78562
	FGFR1	P11362		CAB39_HUMAN	Q9Y376		KDM4C_HUMAN	Q9H3R0		SERHL_HUMAN	Q9NQF3		F2	P00734		Q9UK23				O00622				Q9UK23	O43189
	FGFR1OP2	Q9NVK5		CB39L_HUMAN	Q9H9S4		KDM5A_HUMAN	P29375		SERC1_HUMAN	Q9NRX5		F2RL3	Q96RI0		P43490				Q9NS75				P43490	Q9BVI0
	FGFR2	P21802		CABIN_HUMAN	Q9Y6J0		KDM5B_HUMAN	Q9UGL1		SERC2_HUMAN	Q96SA4		F3	P13726		P55209				O43739				P55209	Q9UMS5
	FGFR3	P22607		CABL1_HUMAN	Q8TDN4		KDM5C_HUMAN	P41229		SERC3_HUMAN	Q13530		F5	P12259		Q99733				Q86T65				Q99733	Q8WXW3
	FGFR4	P22455		CABL2_HUMAN	Q9BTV7		KDM5D_HUMAN	Q9BY66		A1AT_HUMAN	P01009		F7	P08709		O96009				O75553				O96009	Q14442
	FGG	P02679		CABP1_HUMAN	Q9NZU7		KDM6A_HUMAN	O15550		ZPI_HUMAN	Q9UK55		F8	P00451		P49321				Q9UI36				P49321	Q96S52
	FGGY	Q96C11		CABP2_HUMAN	Q9NPB3		VGFR2_HUMAN	P35968		SPA11_HUMAN	Q86U17		F9	P00740		P13591				Q96NX9				P13591	Q969N2
	FGL1	Q08830		CABP4_HUMAN	P57796		KDSR_HUMAN	Q06136		SPA9_HUMAN	Q86WD7		FABP1	P07148		O15394				Q9NYF0				O15394	O00750
	FGL2	Q14314		CABP5_HUMAN	Q9NP86		KEAP1_HUMAN	Q14145		AACT_HUMAN	P01011		FABP2	P12104		O14594				P14920				O14594	O75747
	FH	P07954		CABS1_HUMAN	Q96KC9		KELL_HUMAN	P23276		KAIN_HUMAN	P29622		FABP3	P05413		Q15080				O95886				Q15080	P42338
	FHIT	P49789		CAHD1_HUMAN	Q5VU97		KERA_HUMAN	O60938		IPSP_HUMAN	P05154		FABP4	P15090		O43639				P53355				O43639	P27986
	FHL1	Q13642		CAC1A_HUMAN	O00555		KHDR1_HUMAN	Q07666		CBG_HUMAN	P08185		FABP5	Q01469		P55160				Q9UIK4				P55160	O00459
	FHOD1	Q9Y613		CAC1B_HUMAN	Q00975		KHK_HUMAN	P50053		THBG_HUMAN	P05543		FAF1	Q9UNN5		P19338				O43293				P19338	Q86V86
	FIS1	Q9Y3D6		CAC1C_HUMAN	Q13936		KHNYN_HUMAN	O15037		ILEU_HUMAN	P30740		FAH	P16930		O75380				Q16570				O75380	Q9Y237
	FKBP10	Q96AY3		CAC1D_HUMAN	Q01668		FUBP2_HUMAN	Q92945		SPB10_HUMAN	P48595		FAM120A	Q9NZB2		P20929				Q6PI48				P20929	O00625
	FKBP15	Q5T1M5		CAC1E_HUMAN	Q15878		PAF15_HUMAN	Q15004		SPB11_HUMAN	Q96P15		FAM129B	Q96TA1		Q15223				Q9UER7				Q15223	Q9UG56
	FKBP1A	P62942		CAC1F_HUMAN	O60840		DELE_HUMAN	Q14154		SPB12_HUMAN	Q96P63		FAM13A	O94988		Q92692				Q13117				Q92692	Q9BZ72
	FKBP2	P26885		CAC1G_HUMAN	O43497		TMM94_HUMAN	Q12767		SPB13_HUMAN	Q9UIV8		FAM206A	Q9NX38		Q15843				Q15038				Q15843	Q5JRX3
	FKBP3	Q00688		CAC1H_HUMAN	O95180		WASC5_HUMAN	Q12768		PAI2_HUMAN	P05120		FAM20C	Q8IXL6		Q7Z3B1				Q92904				Q7Z3B1	Q15139
	FKBP4	Q02790		CAC1I_HUMAN	Q9P0X4		RUBIC_HUMAN	Q92622		SPB3_HUMAN	P29508		FAM3C	Q92520		Q8TD19				Q8NFT6				Q8TD19	Q8TDX9
	FKBP9	O95302		CAC1S_HUMAN	Q13698		K0232_HUMAN	Q92628		SPB4_HUMAN	P48594		FAM50B	Q9Y247		Q99435				Q9BQY9				Q99435	Q13563
	FLG	P20930		CA2D1_HUMAN	P54289		K0319_HUMAN	Q5VV43		SPB5_HUMAN	P36952		FAM83C	Q9BQN1		Q9UMX5				Q10586				Q9UMX5	Q9P0L9
	FLG2	Q5D862		CA2D2_HUMAN	Q9NY47		K319L_HUMAN	Q8IZA0		SPB6_HUMAN	P35237		FAM98B	Q52LJ0		Q92859				Q5QP82				Q92859	P08F94
	FLII	Q13045		CA2D4_HUMAN	Q7Z3S7		K0355_HUMAN	O15063		SPB7_HUMAN	O75635		FAM9B	Q8IZU0		P48681				Q8TEB1				P48681	Q16513
	FLNA	P21333		CACB1_HUMAN	Q02641		ECM29_HUMAN	Q5VYK3		SPB8_HUMAN	P50452		FANCC	Q00597		O94856				Q8WV16				O94856	Q99959
	FLNB	O75369		CACB2_HUMAN	Q08289		MRRP3_HUMAN	O15091		SPB9_HUMAN	P50453		FANCE	Q9HB96		P14543				Q96JK2				P14543	Q9Y446
	FLNC	Q14315		CACB3_HUMAN	P54284		MARF1_HUMAN	Q9Y4F3		ANT3_HUMAN	P01008		FAP	Q12884		Q14112				Q58WW2				Q14112	Q99569
	FLOT1	O75955		CACB4_HUMAN	O00305		TALD3_HUMAN	Q9BVV6		HEP2_HUMAN	P05546		FASLG	P48023		Q9GZT8				P61962				Q9GZT8	Q9BX93
	FLOT2	Q14254		CCG2_HUMAN	Q9Y698		K0754_HUMAN	O94854		PAI1_HUMAN	P05121		FASN	P49327		Q9NQR4				Q5TAQ9				Q9NQR4	Q8N3E9
	FLRT2	O43155		CCG3_HUMAN	O60359		K0825_HUMAN	Q8IV33		GDN_HUMAN	P07093		FAT2	Q9NYQ8		Q9BYT8				P59894				Q9BYT8	Q9P212
	FLRT3	Q9NZU0		CCG4_HUMAN	Q9UBN1		T131L_HUMAN	A2VDJ0		PEDF_HUMAN	P36955		FAU	P35544		P15531				P27707				P15531	P19174
	FLT1	P17948		CCG5_HUMAN	Q9UF02		CE162_HUMAN	Q5TB80		A2AP_HUMAN	P08697		FBL	P22087		Q13232				Q8IZD4				Q13232	Q13393
	FLT3	P36888		CCG6_HUMAN	Q9BXT2		K1024_HUMAN	Q9UPX6		IC1_HUMAN	P05155		FBLN1	P23142		Q13287				P40126				Q13287	Q9HAU0
	FLT4	P35916		CCG8_HUMAN	Q8WXS5		K1109_HUMAN	Q2LD37		SERPH_HUMAN	P50454		FBLN2	P98095		P40261				Q92564				P40261	Q99541
	FMOD	Q06828		CYBP_HUMAN	Q9HB71		CEMIP_HUMAN	Q8WUJ3		NEUS_HUMAN	Q99574		FBLN5	Q9UBX5		Q13423				O43602				Q13423	O43660
	FN1	P02751		DFFB_HUMAN	O76075		BIG3_HUMAN	Q5TH69		SPI2_HUMAN	O75830		FBN1	P35555		Q14978				Q92466				Q14978	Q9NRQ2
	FN3K	Q9H479		PYR1_HUMAN	P27708		VIR_HUMAN	Q69YN4		SRTD2_HUMAN	Q14140		FBN2	P35556		Q15233				P35638				Q15233	P29590
	FN3KRP	Q9HA64		CADM1_HUMAN	Q9BY67		K1468_HUMAN	Q9P260		SRTD3_HUMAN	Q9UJW9		FBP1	P09467		P46531				O94850				P46531	P11086
	FNDC1	Q4ZHG4		CADM2_HUMAN	Q8N3J6		K1551_HUMAN	Q9HCM1		SESN1_HUMAN	Q9Y6P5		FBP2	O00757		Q04721				Q99489				Q04721	Q9NRX1
	FNTA	P49354		CADM3_HUMAN	Q8N126		WDR97_HUMAN	A6NE52		SESN2_HUMAN	P58004		FBXL20	Q96IG2		Q9UM47				Q13206				Q9UM47	Q9NST1
	FOLR1	P15328		CADM4_HUMAN	Q8NFZ8		CCAR2_HUMAN	Q8N163		SESN3_HUMAN	P58005		FBXL7	Q9UJT9		P48745				Q9BUQ8				P48745	P41247
	FOLR2	P14207		CALB1_HUMAN	P05937		KIF11_HUMAN	P52732		SET_HUMAN	Q01105		FBXO11	Q86XK2		P61916				Q96GQ7				P61916	Q7Z3K3
	FOLR3	P41439		CALB2_HUMAN	P22676		KIF12_HUMAN	Q96FN5		SETBP_HUMAN	Q9Y6X0		FBXO18	Q8NFZ0		P55786				O00148				P55786	P06746
	FREM2	Q5SZK8		CALC_HUMAN	P01258		KI13A_HUMAN	Q9H1H9		SETD2_HUMAN	Q9BYW2		FBXO28	Q9NVF7		P01160				Q9NQI0				P01160	P28340
	FRMD4B	Q9Y2L6		CALCA_HUMAN	P06881		KI13B_HUMAN	Q9NQT8		SETD7_HUMAN	Q8WTS6		FBXO3	Q9UK99		O95502				Q9Y2R4				O95502	P49005
	FRZB	Q92765		CALCB_HUMAN	P10092		KIF14_HUMAN	Q15058		KMT5A_HUMAN	Q9NQR1		FBXO33	Q7Z6M2		P16083				Q8NHQ9				P16083	Q07864
	FSCN1	Q16658		CACO1_HUMAN	Q9P1Z2		KIF15_HUMAN	Q9NS87		SETB1_HUMAN	Q15047		FBXO40	Q9UH90		Q92823				Q9NY93				Q92823	Q9UBT6
	FSHB	P01225		CALCR_HUMAN	P30988		KI16B_HUMAN	Q96L93		SETB2_HUMAN	Q96T68		FBXW11	Q9UKB1		O14786				Q8IY21				O14786	O95602
	FST	P19883		CALRL_HUMAN	Q16602		KIF17_HUMAN	Q9P2E2		SETX_HUMAN	Q7Z333		FBXW12	Q6X9E4		O60462				O75398				O60462	Q9H9Y6
	FSTL1	Q12841		CALD1_HUMAN	Q05682		KIF1A_HUMAN	Q12756		SE6L1_HUMAN	Q9BYH1		FCGR2A	P12318		Q9UNZ2				Q8WXF8				Q9UNZ2	P30876
	FSTL3	O95633		CALM1_HUMAN	P0DP23		KIF1B_HUMAN	O60333		SE6L2_HUMAN	Q6UXD5		FCGR3A	P08637		Q9H0P0				P12838				Q9H0P0	O15514
	FTCD	O95954		CALM2_HUMAN	P0DP24		KIF1C_HUMAN	O43896		STF1_HUMAN	Q13285		FCGR3B	O75015		Q9P121				P60022				Q9P121	P62875
	FTH1	P02794		CALM3_HUMAN	P0DP25		KI20A_HUMAN	O95235		SF01_HUMAN	Q15637		FCN1	O00602		Q16620				Q96PH6				Q16620	O14802
	FTL	P02792		CALL3_HUMAN	P27482		KI20B_HUMAN	Q96Q89		SF3A1_HUMAN	Q15459		FCN2	Q15485		Q16288				Q9BYW3				Q16288	Q99575
	FTO	Q9C0B1		CALL5_HUMAN	Q9NZT1		KI21A_HUMAN	Q7Z4S6		SF3A2_HUMAN	Q15428		FCN3	O75636		Q02818				Q7Z7B8				Q02818	Q6S8J3
	FUBP1	Q96AE4		CABP8_HUMAN	Q9BXU9		KI21B_HUMAN	O75037		SF3A3_HUMAN	Q12874		FDPS	P14324		Q9UKK9				Q9H1M3				Q9UKK9	Q16633
	FUBP3	Q96I24		CALR_HUMAN	P27797		KIF22_HUMAN	Q14807		SF3B1_HUMAN	O75533		FEN1	P39748		Q14980				Q7Z7B7				Q14980	Q9NQ55
	FUCA1	P04066		CALR3_HUMAN	Q96L12		KIF23_HUMAN	Q02241		SF3B6_HUMAN	Q9Y3B4		FER	P16591		P35658				O15121				P35658	O14495
	FUCA2	Q9BTY2		CALU_HUMAN	O43852		KIF24_HUMAN	Q5T7B8		SF3B2_HUMAN	Q13435		FER1L6	Q2WGJ9		P61970				Q68D51				P61970	P37231
	FUOM	A2VDF0		CALY_HUMAN	Q9NYX4		KIF25_HUMAN	Q9UIL4		SF3B3_HUMAN	Q15393		FERMT3	Q86UX7		Q86UD1				A2RUS2				Q86UD1	O14829
	FURIN	P09958		KCC1A_HUMAN	Q14012		KI26B_HUMAN	Q2KJY2		SF3B4_HUMAN	Q15427		FETUB	Q9UGM5		Q02218				Q5VZ89				Q02218	O75335
	FUS	P35637		KCC1D_HUMAN	Q8IU85		KIF27_HUMAN	Q86VH2		SF3B5_HUMAN	Q9BWJ5		FEZ2	Q9UHY8		P20774				Q6IQ26				P20774	Q86W92
	FUT11	Q495W5		KCC1G_HUMAN	Q96NX5		KIF2A_HUMAN	O00139		1433S_HUMAN	P31947		FGA	P02671		Q8WWZ8				O75140				Q8WWZ8	Q8ND30
	FXYD2	P54710		KCC2A_HUMAN	Q9UQM7		KIF2C_HUMAN	Q99661		ORN_HUMAN	Q9Y3B8		FGB	P02675		Q9NTK5				Q96QD5				Q9NTK5	Q08752
	FYB	O15117		KCC2B_HUMAN	Q13554		KIF3A_HUMAN	Q9Y496		SFPQ_HUMAN	P23246		FGD1	P98174		Q99784				Q9BSY9				Q99784	Q13427
	FYN	P06241		KCC2D_HUMAN	Q13557		KIF3B_HUMAN	O15066		SFR1_HUMAN	Q86XK3		FGD3	Q5JSP0		O95897				Q7L5Y6				O95897	O43447
	G3BP1	Q13283		KCC2G_HUMAN	Q13555		KIF3C_HUMAN	O14782		SFRP5_HUMAN	Q5T4F7		FGF20	Q9NP95		O60313				O60443				O60313	Q9Y3C6
	G6B	O95866		KCC4_HUMAN	Q16566		KIF4A_HUMAN	O95239		SFSWA_HUMAN	Q12872		FGF23	Q9GZV9		Q14982				Q9P202				Q14982	O15297
	G6PD	P11413		KKCC1_HUMAN	Q8N5S9		KIF4B_HUMAN	Q2VIQ3		PSPB_HUMAN	P07988		FGFBP2	Q9BYJ0		P02763				O75907				P02763	O60237
	GAA	P10253		KKCC2_HUMAN	Q96RR4		KIF5A_HUMAN	Q12840		PSPC_HUMAN	P11686		FGFR1	P11362		P19652				Q96DF8				P19652	Q96KQ4
	GALC	P54803		CAMLG_HUMAN	P49069		KINH_HUMAN	P33176		SFTPD_HUMAN	P35247		FGFR2	P21802		Q99650				P23743				Q99650	Q96A00
	GALK1	P51570		CAMP_HUMAN	P49913		KIF5C_HUMAN	O60282		SFXN1_HUMAN	Q9H9B4		FGFR4	P22455		P00480				P52429				P00480	Q16821
	GALM	Q96C23		CHAP1_HUMAN	Q96JM3		KIF7_HUMAN	Q2M1P5		SFXN2_HUMAN	Q96NB2		FGG	P02679		Q96FW1				Q86XP1				Q96FW1	Q9ULJ8
	GALNS	P34059		CAMP1_HUMAN	Q5T5Y3		KIF9_HUMAN	Q9HAQ2		SFXN3_HUMAN	Q9BWM7		FGL1	Q08830		P07237				O75912				P07237	Q15173
	GALNT1	Q10472		CAMP3_HUMAN	Q9P1Y5		KIFA3_HUMAN	Q92845		SFXN5_HUMAN	Q8TD22		FGL2	Q14314		Q9UQ80				Q16854				Q9UQ80	P48454
	GALNT10	Q86SR1		CMTA1_HUMAN	Q9Y6Y1		KIFC1_HUMAN	Q9BW19		SGCB_HUMAN	Q16585		FGR	P09769		P11940				P00374				P11940	O75170
	GALNT12	Q8IXK2		CAND1_HUMAN	Q86VP6		KIFC2_HUMAN	Q96AC6		SGCD_HUMAN	Q92629		FH	P07954		Q9UM07				O43323				Q9UM07	P78395
	GALNT14	Q96FL9		CALX_HUMAN	P27824		KIFC3_HUMAN	Q9BVG8		SGCE_HUMAN	O43556		FHL1	Q13642		P43034				Q02127				P43034	O95522
	GALNT15	Q8N3T1		CAP1_HUMAN	Q01518		KI2L1_HUMAN	P43626		SGCG_HUMAN	Q13326		FHOD1	Q9Y613		P22234				Q96LJ7				P22234	Q92733
	GALNT16	Q8N428		TRAF3_HUMAN	Q13114		KI2L2_HUMAN	P43627		SGCZ_HUMAN	Q96LD1		FIS1	Q9Y3D6		Q13153				Q13268				Q13153	Q9NQV5
	GALNT18	Q6P9A2		CAP2_HUMAN	P40123		KI2L3_HUMAN	P43628		SGK1_HUMAN	O00141		FKBP1A	P62942		Q13177				Q8N5I4				Q13177	P57071
	GALNT2	Q10471		CAPG_HUMAN	P40121		KI2S3_HUMAN	Q14952		SGK2_HUMAN	Q9HBY8		FKBP3	Q00688		P19021				O60231				P19021	Q9Y255
	GALNT3	Q14435		CND3_HUMAN	Q9BPX3		KI3L2_HUMAN	P43630		SGK3_HUMAN	Q96BR1		FKBP4	Q02790		O95428				Q14147				O95428	Q70Z35
	GALNT4	Q8N4A0		CAN1_HUMAN	P07384		KI3L3_HUMAN	Q8N743		SMS1_HUMAN	Q86VZ5		FKBP5	Q13451		Q13219				Q8IY37				Q13219	Q7Z3G6
	GALNT5	Q7Z7M9		CAN10_HUMAN	Q9HC96		KIRR1_HUMAN	Q96J84		SMS2_HUMAN	Q8NHU3		FKBP8	Q14318		Q99497				Q6P158				Q99497	P49643
	GALNT6	Q8NCL4		CAN11_HUMAN	Q9UMQ6		KIRR2_HUMAN	Q6UWL6		SGO2_HUMAN	Q562F6		FKBP9	O95302		P09874				Q96C10				P09874	Q9UGJ0
	GALNT7	Q86SF2		CAN12_HUMAN	Q6ZSI9		KIRR3_HUMAN	Q8IZU9		SGPL1_HUMAN	O95470		FLG	P20930		Q9HBI1				Q68CQ4				Q9HBI1	Q05513
	GALT	P07902		CAN2_HUMAN	P17655		KISSR_HUMAN	Q969F8		SGPP1_HUMAN	Q9BX95		FLG2	Q5D862		P11498				Q9UNQ2				P11498	O43422
	GAMT	Q14353		CAN3_HUMAN	P20807		KIT_HUMAN	P10721		SGSM2_HUMAN	O43147		FLII	Q13045		Q15365				P49895				Q15365	P51817
	GANAB	Q14697		CAN5_HUMAN	O15484		SCF_HUMAN	P21583		SGTA_HUMAN	O43765		FLNA	P21333		Q15366				Q92813				Q15366	Q99873
	GAPDH	P04406		CAN6_HUMAN	Q9Y6Q1		KLC1_HUMAN	Q07866		SGTB_HUMAN	Q96EQ0		FLNB	O75369		P05165				P55073				P05165	Q8NFJ6
	GARS	P41250		CAN7_HUMAN	Q9Y6W3		KLC3_HUMAN	Q6P597		SH2B2_HUMAN	O14492		FLNC	Q14315		P05166				Q14689				P05166	Q92786
	GART	P22102		CAN9_HUMAN	O14815		KLC2_HUMAN	Q9H0B6		SH2B3_HUMAN	Q9UQQ2		FLOT1	O75955		Q08174				Q9P265				Q08174	O43395
	GAS1	P54826		CPNS1_HUMAN	P04632		KLC4_HUMAN	Q9NSK0		SH21A_HUMAN	O60880		FLOT2	Q14254		Q9NPG4				O95057				Q9NPG4	O43172
	GAS6	Q14393		CPNS2_HUMAN	Q96L46		KLF1_HUMAN	Q13351		SH22A_HUMAN	Q9NP31		FLT1	P17948		Q96QU1				O95661				Q96QU1	O75400
	GAST	P01350		CAPR2_HUMAN	Q6IMN6		KLF11_HUMAN	O14901		SH3BG_HUMAN	P55822		FLT4	P35916		Q9HC56				Q155Q3				Q9HC56	Q13523
	GATM	P50440		CAYP1_HUMAN	Q13938		KLF12_HUMAN	Q9Y4X4		SH3L1_HUMAN	O75368		FN1	P02751		Q9UN70				O94907				Q9UN70	O94906
	GBA	P04062		CAPS1_HUMAN	Q9ULU8		KLF13_HUMAN	Q9Y2Y9		SH3L2_HUMAN	Q9UJC5		FN3K	Q9H479		Q16822				Q9UBU2				Q16822	P23942
	GBAS	O75323		CAPS2_HUMAN	Q86UW7		KLF15_HUMAN	Q9UIH9		SH3L3_HUMAN	Q9H299		FN3KRP	Q9HA64		P22061				Q9UK85				P22061	P48634
	GBE1	Q04446		CAYP2_HUMAN	Q9BXY5		KLF16_HUMAN	Q9BXK1		3BP1_HUMAN	Q9Y3L3		FNBP1	Q96RU3		Q15113				P10515				Q15113	Q5JSZ5
	GC	P02774		CAZA1_HUMAN	P52907		KLF2_HUMAN	Q9Y5W3		3BP2_HUMAN	P78314		FNDC3A	Q9Y2H6		Q8NBP7				Q12959				Q8NBP7	P56730
	GCA	P28676		CAZA2_HUMAN	P47755		KLF3_HUMAN	P57682		3BP5_HUMAN	O60239		FOLH1	Q04609		Q9UHG3				Q14168				Q9UHG3	Q9Y6M0
	GCHFR	P30047		CAZA3_HUMAN	Q96KX2		KLF4_HUMAN	O43474		SH3G1_HUMAN	Q99961		FOSL1	P15407		Q99447				Q15700				Q99447	Q9BXM0
	GCLC	P48506		CAPZB_HUMAN	P47756		KLF5_HUMAN	Q13887		SH3G2_HUMAN	Q99962		FOXC1	Q12948		Q13442				Q13368				Q13442	Q00887
	GCLM	P48507		CAR10_HUMAN	Q9BWT7		KLF6_HUMAN	Q99612		SH3G3_HUMAN	Q99963		FOXD4L1	Q9NU39		O14737				P78352				O14737	O75475
	GCN1	Q92616		CAR11_HUMAN	Q9BXL7		KLF7_HUMAN	O75840		SHLB1_HUMAN	Q9Y371		FOXI1	Q12951		O75340				Q15334				O75340	Q8TAA3
	GCNT1	Q02742		CAR14_HUMAN	Q9BXL6		KLF8_HUMAN	O95600		SHLB2_HUMAN	Q9NR46		FOXP1	Q9H334		Q8WUM4				Q8TDM6				Q8WUM4	P48556
	GCNT2	Q8N0V5		CAR16_HUMAN	Q5EG05		KLF9_HUMAN	Q13886		SH3K1_HUMAN	Q96B97		FPGT	O14772		Q14432				O14490				Q14432	Q9UKA9
	GCSH	P23434		CAR17_HUMAN	Q5XLA6		KLDC2_HUMAN	Q9Y2U9		SPD2B_HUMAN	A1X283		FRK	P42685		P01127				Q9P1A6				P01127	Q16647
	GDA	Q9Y2T3		CAR18_HUMAN	P57730		KLDC3_HUMAN	Q9BQ90		SH3R2_HUMAN	Q8TEC5		FRMD4B	Q9Y2L6		P16234				Q9Y2H0				P16234	P01270
	GDF11	O95390		CARD6_HUMAN	Q9BX69		KLDC4_HUMAN	Q8TBB5		S3TC1_HUMAN	Q8TE82		FSCN1	Q16658		P09619				Q6UY11				P09619	Q15678
	GDF15	Q99988		CARD9_HUMAN	Q9H257		KLD7A_HUMAN	Q5VTJ3		S3TC2_HUMAN	Q8TF17		FST	P19883		P30101				Q9NR61				P30101	Q9Y2R2
	GDF2	Q9UK05		CHSP1_HUMAN	Q9Y2V2		KLHL1_HUMAN	Q9NR64		SHAN1_HUMAN	Q9Y566		FSTL1	Q12841		P13667				P56177				P13667	P26045
	GDI1	P31150		CARM1_HUMAN	Q86X55		KLH13_HUMAN	Q9P2N7		SHAN2_HUMAN	Q9UPX8		FTH1	P02794		Q15084				O60479				Q15084	P29074
	GDI2	P50395		SYCC_HUMAN	P49589		KLH14_HUMAN	Q9P2G3		SHBG_HUMAN	P04278		FTL	P02792		Q15118				P56178				Q15118	P54829
	GFAP	P14136		SYCM_HUMAN	Q9HA77		KLH17_HUMAN	Q6TDP4		SHC1_HUMAN	P29353		FUBP1	Q96AE4		O00151				P56179				O00151	Q15256
	GFRA1	P56159		CART_HUMAN	Q16568		KLH18_HUMAN	O94889		SHC2_HUMAN	P98077		FUCA1	P04066		Q53GG5				Q14565				Q53GG5	Q16769
	GFRA2	O00451		CASC3_HUMAN	O15234		KLHL2_HUMAN	O95198		SHC3_HUMAN	Q92529		FUCA2	Q9BTY2		Q96HC4				Q8IV36				Q96HC4	Q9BXF6
	GFRA3	O60609		CASC4_HUMAN	Q6P4E1		KLH20_HUMAN	Q9Y2M5		SHP1L_HUMAN	Q9BZQ2		FURIN	P09958		O00764				Q13316				O00764	Q9NX57
	GGACT	Q9BVM4		KNL1_HUMAN	Q8NG31		KLH21_HUMAN	Q9UJP4		SHF_HUMAN	Q7M4L6		FUS	P35637		Q15121				Q9Y222				Q15121	Q96DA2
	GGCT	O75223		CSKP_HUMAN	O14936		KLH22_HUMAN	Q53GT1		SHH_HUMAN	Q15465		FXR1	P51114		Q5VY43				Q09013				Q5VY43	O95716
	GGH	Q92820		CASK_HUMAN	P07498		KLH24_HUMAN	Q6TFL4		SHSA2_HUMAN	Q6UWI4		FXYD5	Q96DB9		P30086				Q9Y5R6				P30086	Q9NS91
	GGT1	P19440		CSKI1_HUMAN	Q8WXD9		KLH26_HUMAN	Q53HC5		GLYC_HUMAN	P34896		FYN	P06241		Q96S96				Q9NQL9				Q96S96	Q92878
	GGT5	P36269		CSKI2_HUMAN	Q8WXE0		KLH28_HUMAN	Q9NXS3		GLYM_HUMAN	P34897		FZD1	Q9UP38		P01210				Q96SC8				P01210	Q9Y620
	GGT6	Q6P531		CASP1_HUMAN	P29466		KLH29_HUMAN	Q96CT2		SHOC2_HUMAN	Q9UQ13		FZD8	Q9H461		P12955				Q09019				P12955	P78406
	GGT7	Q9UJ14		CASPA_HUMAN	Q92851		KLHL3_HUMAN	Q9UH77		SHOX_HUMAN	O15266		G3BP1	Q13283		P10720				Q8TDJ6				P10720	P15918
	GH1	P01241		CASPE_HUMAN	P31944		KLH31_HUMAN	Q9H511		SHOX2_HUMAN	O60902		G6PD	P11413		O15067				Q9P2D7				O15067	Q7Z5J4
	GHR	P10912		CASP2_HUMAN	P42575		KLH32_HUMAN	Q96NJ5		SHPK_HUMAN	Q9UHJ6		GAA	P10253		Q9UHV9				Q8IVF4				Q9UHV9	Q86X10
	GHRL	Q9UBU3		CASP3_HUMAN	P42574		KLHL4_HUMAN	Q9C0H6		SHRM2_HUMAN	Q13796		GABBR1	Q9UBS5		O15212				Q96DT5				O15212	O60895
	GINM1	Q9NU53		CASP4_HUMAN	P49662		KLH41_HUMAN	O60662		SHRM3_HUMAN	Q8TF72		GADD45G	O95257		P17858				Q9GZS0				P17858	P49792
	GIPC3	Q8TF64		CASP5_HUMAN	P51878		KLH42_HUMAN	Q9P2K6		SUIS_HUMAN	P14410		GAL	P22466		Q01813				Q96EY1				Q01813	P46060
	GIT1	Q9Y2X7		CASP6_HUMAN	P55212		KLHL5_HUMAN	Q96PQ7		SIAE_HUMAN	Q9HAT2		GALC	P54803		P07737				Q8WW22				P07737	P61224
	GKN1	Q9NS71		CASP7_HUMAN	P55210		KLHL6_HUMAN	Q8WZ60		SIAH1_HUMAN	Q8IUQ4		GALK1	P51570		P18669				Q9NXW2				P18669	Q13905
	GLA	P06280		CASP8_HUMAN	Q14790		KLHL8_HUMAN	Q9P2G9		SIAH2_HUMAN	O43255		GALNT1	Q10472		P15259				P59910				P15259	Q92565
	GLB1	P16278		C8AP2_HUMAN	Q9UKL3		KLHL9_HUMAN	Q9P2J3		SN_HUMAN	Q9BZZ2		GALNT2	Q10471		P52209				Q8TBM8				P52209	P10276
	GLCE	O94923		CASP9_HUMAN	P55211		KLK1_HUMAN	P06870		SIG10_HUMAN	Q96LC7		GALR2	O43603		P00558				P25686				P00558	P13631
	GLDC	P23378		CASQ1_HUMAN	P31415		KLK10_HUMAN	O43240		SIG11_HUMAN	Q96RL6		GAMT	Q14353		O95336				O75953				O95336	O43374
	GLDN	Q6ZMI3		CASR_HUMAN	P41180		KLK11_HUMAN	Q9UBX7		SIG12_HUMAN	Q96PQ1		GAN	Q9H2C0		O75594				O75190				O75594	O95294
	GLG1	Q92896		CASS4_HUMAN	Q9NQ75		KLK12_HUMAN	Q9UKR0		SIG14_HUMAN	Q08ET2		GANAB	Q14697		Q96PD5				Q7Z6W7				Q96PD5	Q9UJF2
	GLIPR2	Q9H4G4		RPA34_HUMAN	O15446		KLK13_HUMAN	Q9UKR3		SIGL5_HUMAN	O15389		GAP43	P17677		P36871				Q8NHS0				P36871	Q02833
	GLO1	Q04760		ICAL_HUMAN	P20810		KLK14_HUMAN	Q9P0G3		SIGL6_HUMAN	O43699		GAPDH	P04406		P35232				Q9UBS3				P35232	Q8NHQ8
	GLOD4	Q9HC38		CASZ1_HUMAN	Q86V15		KLK15_HUMAN	Q9H2R5		SIGL7_HUMAN	Q9Y286		GAPDHS	O14556		Q99623				Q96KC8				Q99623	P06400
	GLRX	P35754		CATA_HUMAN	P04040		KLK2_HUMAN	P20151		SIGL8_HUMAN	Q9NYZ4		GAR1	Q9NY12		O43175				Q9UKB3				O43175	Q99708
	GLRX3	O76003		GLYAT_HUMAN	Q6IB77		KLK3_HUMAN	P07288		SIGL9_HUMAN	Q9Y336		GARS	P41250		Q6UXB8				O75165				Q6UXB8	Q9BYM8
	GLRX5	Q86SX6		CTSR2_HUMAN	Q96P56		KLK5_HUMAN	Q9Y337		SIK1_HUMAN	P57059		GART	P22102		P19957				Q9NX36				P19957	P28749
	GLS	O94925		CTSRB_HUMAN	Q9H7T0		KLK6_HUMAN	Q92876		SIK2_HUMAN	Q9H0K1		GAS2L1	Q99501		P42356				Q96LL9				P42356	Q08999
	GLTP	Q9NZD2		CAV1_HUMAN	Q03135		KLK7_HUMAN	P49862		SIL1_HUMAN	Q9H173		GAS8	O95995		P01833				Q9NNZ3				P01833	Q96T37
	GLUD1	P00367		CAV2_HUMAN	P51636		KLK8_HUMAN	O60259		SIM1_HUMAN	P81133		GATA3	P23771		Q96FE7				Q8N7S2				Q96FE7	Q96I25
	GLUL	P15104		MTG8R_HUMAN	O43439		KLKB1_HUMAN	P03952		SIM2_HUMAN	Q14190		GATAD2A	Q86YP4		P12273				O75061				P12273	Q9Y4C8
	GM2A	P17900		PEBB_HUMAN	Q13951		KLRB1_HUMAN	Q12918		SIN3A_HUMAN	Q96ST3		GATAD2B	Q8WXI9		P48426				O75937				P48426	Q5T8P6
	GMDS	O60547		CBL_HUMAN	P22681		NKG2C_HUMAN	P26717		SIN3B_HUMAN	O75182		GATM	P50440		Q9P0Z9				O96015				Q9P0Z9	Q14498
	GMFB	P60983		CBLB_HUMAN	Q13191		KLRD1_HUMAN	Q13241		SIPA1_HUMAN	Q96FS4		GBE1	Q04446		P98161				O14645				P98161	Q8IUH3
	GMFG	O60234		CBLC_HUMAN	Q9ULV8		KLRF1_HUMAN	Q9NZS2		SI1L1_HUMAN	O43166		GBF1	Q92538		P30613				Q92874				P30613	P78332
	GMPPA	Q96IJ6		CBLN1_HUMAN	P23435		KMO_HUMAN	O15229		SI1L2_HUMAN	Q9P2F8		GBP1	P32455		P14618				Q13609				P14618	Q15434
	GMPPB	Q9Y5P6		CBLN2_HUMAN	Q8IUK8		KMT2A_HUMAN	Q03164		SI1L3_HUMAN	O60292		GBP4	Q96PP9		Q13835				Q8WZ79				Q13835	P38159
	GMPR	P36959		CBLN3_HUMAN	Q6UW01		KMT2B_HUMAN	Q9UMN6		SHPS1_HUMAN	P78324		GC	P02774		Q13093				Q6XZF7				Q13093	P82980
	GMPR2	Q9P2T1		CBLN4_HUMAN	Q9NTU7		KMT2C_HUMAN	Q8NEZ4		SIRB1_HUMAN	O00241		GCA	P28676		Q9Y263				Q9UBC3				Q9Y263	P62877
	GNA13	Q14344		CBR1_HUMAN	P16152		KMT2D_HUMAN	O14686		SIRBL_HUMAN	Q5TFQ8		GCAT	O75600		P00750				Q9UJW3				P00750	P18754
	GNAI1	P63096		CBR3_HUMAN	O75828		KNG1_HUMAN	P01042		SIRPG_HUMAN	Q9P1W8		GCC2	Q8IWJ2		P00749				Q5QJE6				P00749	Q9Y2P8
	GNAI2	P04899		CBS_HUMAN	P35520		KNTC1_HUMAN	P50748		SIR1_HUMAN	Q96EB6		GCGR	P47871		Q9NQ66				Q14183				Q9NQ66	Q96D15
	GNAI3	P08754		CBX3_HUMAN	Q13185		IMA5_HUMAN	P52294		SIR2_HUMAN	Q8IXJ6		GCLC	P48506		P51178				Q14184				P51178	P35243
	GNAQ	P50148		CBX4_HUMAN	O00257		IMA1_HUMAN	P52292		SIR3_HUMAN	Q9NTG7		GCN1	Q92616		P16885				Q8IZD9				P16885	Q96NR8
	GNAZ	P19086		CBX6_HUMAN	O95503		IMA4_HUMAN	O00505		SIR4_HUMAN	Q9Y6E7		GCSH	P23434		Q15149				Q9H7D0				Q15149	O95072
	GNB1	P62873		CBX7_HUMAN	O95931		IMA6_HUMAN	O15131		SIR5_HUMAN	Q9NXA8		GDA	Q9Y2T3		P08567				Q96HP0				P08567	P46063
	GNB2	P62879		CBX8_HUMAN	Q9HC52		IMA7_HUMAN	O60684		SIR6_HUMAN	Q8N6T7		GDF10	P55107		P00747				Q96N67				P00747	O94762
	GNB4	Q9HAV0		CBY1_HUMAN	Q9Y3M2		IMB1_HUMAN	Q14974		SIR7_HUMAN	Q9NRC8		GDF15	Q99988		O60240				Q8NF50				O60240	Q01201
	GNB5	O14775		C2D1A_HUMAN	Q6P1N0		RASK_HUMAN	P01116		SIVA_HUMAN	O15304		GDF2	Q9UK05		O60664				Q9P104				O60664	Q13127
	GNG11	P61952		CCAR1_HUMAN	Q8IX12		KREM1_HUMAN	Q96MU8		SIX2_HUMAN	Q9NPC8		GDF5	P43026		Q96Q06				Q9UPQ8				Q96Q06	O60673
	GNG5	P63218		CCBE1_HUMAN	Q6UXH8		KREM2_HUMAN	Q8NCW0		SIX3_HUMAN	O95343		GDI1	P31150		Q02809				Q5JWR5				Q02809	P35251
	GNL1	P36915		KAT1_HUMAN	Q16773		KRIT1_HUMAN	O00522		SIX4_HUMAN	Q9UIU6		GDI2	P50395		P13797				Q9Y3R5				P13797	P35250
	GNMT	Q14749		KAT3_HUMAN	Q6YP21		KRR1_HUMAN	Q13601		SIX5_HUMAN	Q8N196		GEMIN4	P57678		P55058				Q92782				P55058	P35249
	GNPDA1	P46926		CC113_HUMAN	Q9H0I3		K2C1_HUMAN	P04264		SIX6_HUMAN	O95475		GFAP	P14136		Q9BX97				Q92784				Q9BX97	P40937
	GNPDA2	Q8TDQ7		CC116_HUMAN	Q8IYX3		K1C10_HUMAN	P13645		SKAP2_HUMAN	O75563		GGCT	O75223		P51805				Q9H2P9				P51805	O15211
	GNPNAT1	Q96EK6		CC121_HUMAN	Q6ZUS5		K1C12_HUMAN	Q99456		SKI_HUMAN	P12755		GGH	Q92820		O43157				P42658				O43157	O14924
	GNPTAB	Q3T906		CC126_HUMAN	Q96EE4		K1C13_HUMAN	P13646		SKIL_HUMAN	P12757		GGPS1	O95749		O15031				Q7L190				O15031	P41220
	GNPTG	Q9UJJ9		CCD13_HUMAN	Q8IYE1		K1C14_HUMAN	P02533		SKIV2_HUMAN	Q15477		GGT1	P19440		Q9ULL4				Q14919				Q9ULL4	O76081
	GNS	P15586		CC130_HUMAN	P13994		K1C15_HUMAN	P19012		SK2L2_HUMAN	P42285		GHDC	Q8N2G8		Q9Y4D7				P21728				Q9Y4D7	P49796
	GOLGB1	Q14789		CC136_HUMAN	Q96JN2		K1C16_HUMAN	P08779		SKP1_HUMAN	P63208		GHRL	Q9UBU3		P16233				P14416				P16233	P49802
	GOLIM4	O00461		CC146_HUMAN	Q8IYE0		K1C17_HUMAN	Q04695		SKP2_HUMAN	Q13309		GIP	P09681		P00491				P21917				P00491	O75916
	GOLM1	Q8NBJ4		CC171_HUMAN	Q6TFL3		K1C18_HUMAN	P05783		SLAP2_HUMAN	Q9H6Q3		GIT1	Q9Y2X7		O00592				P21918				O00592	Q8TCX5
	GOT1	P17174		CFA45_HUMAN	Q9UL16		K1C19_HUMAN	P08727		SLAF1_HUMAN	Q13291		GIT2	Q14161		P27169				Q9NRR4				P27169	Q86UR5
	GOT2	P00505		CCD25_HUMAN	Q86WR0		K22E_HUMAN	P35908		SLAF6_HUMAN	Q96DU3		GK2	Q14410		Q15166				Q13474				Q15166	Q9BVS4
	GP1BA	P07359		CCDC3_HUMAN	Q9BQI4		K1C20_HUMAN	P35900		SLBP_HUMAN	Q14493		GKN1	Q9NS71		P16435				P53805				P16435	Q13129
	GP1BB	P13224		CCD33_HUMAN	Q8N5R6		K1C23_HUMAN	Q9C075		NTCP_HUMAN	Q14973		GLB1	P16278		Q15063				P56555				Q15063	P04808
	GP2	P55259		CCD40_HUMAN	Q4G0X9		K1C24_HUMAN	Q2M2I5		P3_HUMAN	P09131		GLCE	O94923		Q9H2U2				Q9UL01				Q9H2U2	Q05823
	GP5	P40197		CCD43_HUMAN	Q96MW1		K1C25_HUMAN	Q7Z3Z0		NRAM1_HUMAN	P49279		GLIPR2	Q9H4G4		P02775				Q9NZW4				P02775	Q9UBS8
	GP6	Q9HCN6		CCD50_HUMAN	Q8IVM0		K1C27_HUMAN	Q7Z3Y8		S12A1_HUMAN	Q13621		GLO1	Q04760		P62937				Q96EV8				P62937	Q9NWF9
	GP9	P14770		WASC3_HUMAN	Q9Y3C0		K2C3_HUMAN	P12035		S12A2_HUMAN	P55011		GLRX	P35754		P23284				Q86Y01				P23284	Q9Y252
	GPC1	P35052		CCD58_HUMAN	Q4VC31		K1H1_HUMAN	Q15323		S12A3_HUMAN	P55017		GLUD1	P00367		P30405				Q86UW9				P30405	O60942
	GPC4	O75487		CCDC6_HUMAN	Q16204		K1H2_HUMAN	Q14532		S12A4_HUMAN	Q9UP95		GLUL	P15104		O60437				Q8N9I9				O60437	Q96MS0
	GPC6	Q9Y625		CCD60_HUMAN	Q8IWA6		KT33A_HUMAN	O76009		S12A5_HUMAN	Q9H2X9		GM2A	P17900		P49593				Q8TDB6				P49593	Q03395
	GPD1	P21695		CCD63_HUMAN	Q8NA47		KT33B_HUMAN	Q14525		S12A6_HUMAN	Q9UHW9		GMCL1	Q96IK5		P62136				Q9NRD9				P62136	P35398
	GPD2	P43304		BICL2_HUMAN	A1A5D9		KRT34_HUMAN	O76011		S12A7_HUMAN	Q9Y666		GMEB1	Q9Y692		P62140				P28562				P62140	P15927
	GPI	P06744		CCD68_HUMAN	Q9H2F9		KRT35_HUMAN	Q92764		S13A1_HUMAN	Q9BZW2		GMFB	P60983		P36873				Q9Y6W6				P36873	P40429
	GPLD1	P80108		CCDC7_HUMAN	Q96M83		KRT36_HUMAN	O76013		S13A2_HUMAN	Q13183		GMFG	O60234		Q96C90				Q9UNI6				Q96C90	Q02543
	GPNMB	Q14956		CCD71_HUMAN	Q8IV32		KRT38_HUMAN	O76015		S13A3_HUMAN	Q8WWT9		GMPR	P36959		P30153				Q6B8I1				P30153	P05388
	GPR37	O15354		CCDC8_HUMAN	Q9H0W5		K2C4_HUMAN	P19013		S13A4_HUMAN	Q9UKG4		GMPR2	Q9P2T1		Q15257				Q9UII6				Q15257	P78346
	GPS1	Q13098		CCD80_HUMAN	Q76M96		K2C5_HUMAN	P13647		UT2_HUMAN	Q15849		GMPS	P49915		Q08209				Q9H1R2				Q08209	P62280
	GPSM3	Q9Y4H4		CCD83_HUMAN	Q8IWF9		K2C6A_HUMAN	P02538		S15A1_HUMAN	P46059		GNA13	Q14344		P42785				Q9BY84				P42785	P63220
	GPT	P24298		CC85B_HUMAN	Q15834		K2C6B_HUMAN	P04259		S15A2_HUMAN	Q16348		GNA15	P30679		Q06830				Q05923				Q06830	P42677
	GPX1	P07203		GRDN_HUMAN	Q3V6T2		K2C6C_HUMAN	P48668		MOT1_HUMAN	P53985		GNAI1	P63096		P32119				Q9H596				P32119	Q15349
	GPX3	P22352		CC88B_HUMAN	A6NC98		K2C7_HUMAN	P08729		MOT8_HUMAN	P36021		GNAI3	P08754		P30048				Q16690				P30048	O75676
	GPX4	P36969		DAPLE_HUMAN	Q9P219		K2C71_HUMAN	Q3SY84		MOT4_HUMAN	O15427		GNB1	P62873		P30044				Q16829				P30044	P23443
	GRAP2	O75791		CCDC9_HUMAN	Q9Y3X0		K2C72_HUMAN	Q14CN4		MOT6_HUMAN	O15375		GNB3	P16520		P30041				Q13202				P30041	Q8N122
	GRB2	P62993		CCD91_HUMAN	Q7Z6B0		K2C73_HUMAN	Q86Y46		MOT7_HUMAN	O15403		GNB5	O14775		P51888				Q99956				P51888	P31350
	GRHPR	Q9UBQ7		CCD96_HUMAN	Q2M329		K2C74_HUMAN	Q7RTS7		MOT3_HUMAN	O95907		GNPTG	Q9UJJ9		P48147				P33316				P48147	Q9NYV6
	GRK6	P43250		CCHCR_HUMAN	Q8TD31		K2C75_HUMAN	O95678		MOT9_HUMAN	Q7RTY1		GOLGA1	Q92805		P13727				P54792				P13727	Q14684
	GRN	P28799		CALI_HUMAN	Q13939		K22O_HUMAN	Q01546		NPT1_HUMAN	Q14916		GOLGA4	Q13439		Q92954				O14641				Q92954	Q9Y3A4
	GRPEL1	Q9HAV7		CCKN_HUMAN	P06307		K2C1B_HUMAN	Q7Z794		S17A5_HUMAN	Q9NRA2		GOLGB1	Q14789		P10644				Q92997				P10644	Q96IZ7
	GSDMA	Q96QA5		CCKAR_HUMAN	P32238		K2C78_HUMAN	Q8N1N4		VGLU3_HUMAN	Q8NDX2		GOLM1	Q8NBJ4		P13861				O14576				P13861	Q9NZ71
	GSK3B	P49841		GASR_HUMAN	P32239		K2C8_HUMAN	P05787		S17A9_HUMAN	Q9BYT1		GOT1	P17174		P17252				Q9Y6G9				P17252	Q9BY42
	GSN	P06396		CCL11_HUMAN	P51671		K2C80_HUMAN	Q6KB66		VMAT2_HUMAN	Q05940		GOT2	P00505		P05771				O43237				P05771	Q01196
	GSPT1	P15170		CCL14_HUMAN	Q16627		KRT81_HUMAN	Q14533		VACHT_HUMAN	Q16572		GP1BA	P07359		Q04759				Q8NCM8				Q04759	P48443
	GSR	P00390		CCL15_HUMAN	Q16663		KRT82_HUMAN	Q9NSB4		S19A1_HUMAN	P41440		GP5	P40197		P14314				P63172				P14314	P21817
	GSS	P48637		CCL16_HUMAN	O15467		KRT84_HUMAN	Q9NSB2		S19A2_HUMAN	O60779		GP6	Q9HCN6		P78527				Q13627				P78527	Q92736
	GSTK1	Q9Y2Q3		CCL17_HUMAN	Q92583		KRT85_HUMAN	P78386		EAA3_HUMAN	P43005		GPA33	Q99795		Q13976				Q9Y463				Q13976	Q15413
	GSTM2	P28161		CCL18_HUMAN	P55774		KRT86_HUMAN	O43790		EAA2_HUMAN	P43004		GPANK1	O95872		P01236				O43781				P01236	Q9NZJ4
	GSTM3	P21266		CCL2_HUMAN	P13500		K1C9_HUMAN	P35527		EAA1_HUMAN	P43003		GPATCH2	Q9NW75		O14744				O75923				O14744	Q15424
	GSTM4	Q03013		CCL20_HUMAN	P78556		KR103_HUMAN	P60369		SATT_HUMAN	P43007		GPATCH8	Q9UKJ3		P04156				Q8WXU2				P04156	Q14151
	GSTO1	P78417		CCL21_HUMAN	O00585		KR132_HUMAN	Q52LG2		AAAT_HUMAN	Q15758		GPC4	O75487		P04070				Q9NVP4				P04070	Q9NSC2
	GSTP1	P09211		CCL23_HUMAN	P55773		KR134_HUMAN	Q3LI77		EAA4_HUMAN	P48664		GPD1	P21695		Q9UNN8				Q86YF9				Q9UNN8	Q9BXA9
	GSTT1	P30711		CCL26_HUMAN	Q9Y258		KRA22_HUMAN	Q9BYT5		EAA5_HUMAN	O00341		GPD2	P43304		P07225				Q86Y13				P07225	Q5K651
	GSTZ1	O43708		CCL5_HUMAN	P13501		KRA55_HUMAN	Q701N2		S20A2_HUMAN	Q08357		GPI	P06744		P22891				O00716				P22891	Q9Y6B6
	GUCA2A	Q02747		CCL8_HUMAN	P80075		KTAP2_HUMAN	Q8N6L1		S22AB_HUMAN	Q9NSA0		GPLD1	P80108		Q9UMS4				Q16254				Q9UMS4	O43290
	GUCA2B	Q16661		CCM2L_HUMAN	Q9NUG4		KTDAP_HUMAN	P60985		S22AH_HUMAN	Q8WUG5		GPNMB	Q14956		Q6P2Q9				Q15329				Q6P2Q9	Q15020
	GUCY1A3	Q02108		CCNA1_HUMAN	P78396		KSR1_HUMAN	Q8IVT5		S22AI_HUMAN	Q96BI1		GPR50	Q13585		Q16378				Q96AV8				Q16378	Q01826
	GUCY1B3	Q02153		CCNA2_HUMAN	P20248		KSR2_HUMAN	Q6VAB6		S22A3_HUMAN	O75751		GPR83	Q9NYM4		P07477				O00559				P07477	O95104
	GUK1	Q16774		CCNB1_HUMAN	P14635		CNKR2_HUMAN	Q8WXI2		S22A4_HUMAN	Q9H015		GPS1	Q13098		P07478				Q9UH73				P07478	Q9UPN6
	GUSB	P08236		CCNB2_HUMAN	O95067		KTN1_HUMAN	Q86UP2		S22A5_HUMAN	O76082		GPT	P24298		O95084				Q9HAK2				O95084	P57086
	GXYLT1	Q4G148		CCNB3_HUMAN	Q8WWL7		KY_HUMAN	Q8NBH2		S22A7_HUMAN	Q9Y694		GPX1	P07203		P35030				Q9H4W6				P35030	O95171
	GYG1	P46976		CCNC_HUMAN	P24863		KYNU_HUMAN	Q16719		S23A1_HUMAN	Q9UHI7		GPX3	P22352		P24158				Q9BQW3				P24158	Q8WU76
	GYS1	P13807		CCND3_HUMAN	P30281		L1CAM_HUMAN	P32004		S23A2_HUMAN	Q9UGH3		GPX4	P36969		P07602				Q99848				P07602	O76038
	H2AFY	O75367		CCNE1_HUMAN	P24864		LMBL1_HUMAN	Q9Y468		NCKX1_HUMAN	O60721		GRAMD1A	Q96CP6		Q9Y617				Q9BY08				Q9Y617	Q9Y6U3
	H6PD	O95479		CCNE2_HUMAN	O96020		LMBL2_HUMAN	Q969R5		NCKX3_HUMAN	Q9HC58		GRAP	Q13588		P25787				O95905				P25787	Q9UQR0
	HAAO	P46952		CCNF_HUMAN	P41002		LACC1_HUMAN	Q8IV20		TXTP_HUMAN	P53007		GRAP2	O75791		P25788				O60344				P25788	Q9Y5Y9
	HABP2	Q14520		CCNG1_HUMAN	P51959		AFG1L_HUMAN	Q8WV93		M2OM_HUMAN	Q02978		GRB2	P62993		P25789				O95672				P25789	Q9NY46
	HACD3	Q9P035		CCNG2_HUMAN	Q16589		LACRT_HUMAN	Q9GZZ8		CMC1_HUMAN	O75746		GRHPR	Q9UBQ7		P28066				O75521				P28066	Q14524
	HADH	Q16836		CCNH_HUMAN	P51946		LACTB_HUMAN	P83111		CMC2_HUMAN	Q9UJS0		GRIA1	P42261		P60900				Q9H8V3				P60900	Q01118
	HADHA	P40939		CCNI_HUMAN	Q14094		LAD1_HUMAN	O00515		UCP5_HUMAN	O95258		GRIK3	Q13003		O14818				Q92838				O14818	Q9UQD0
	HADHB	P55084		CCNO_HUMAN	P22674		LAGE3_HUMAN	Q14657		GDC_HUMAN	P16260		GRIN1	Q05586		P20618				Q9HAV5				P20618	Q9BWW7
	HAGH	Q16775		CCNT1_HUMAN	O60563		LAIR1_HUMAN	Q6GTX8		PM34_HUMAN	O43808		GRIN2A	Q12879		P40306				Q96F86				P40306	P21912
	HAL	P42357		CCNT2_HUMAN	O60583		LALBA_HUMAN	P00709		GHC2_HUMAN	Q9H1K4		GRIN2C	Q14957		P49721				Q6P2E9				P49721	P20132
	HAMP	P81172		CP110_HUMAN	O43303		LAMA1_HUMAN	P25391		TPC_HUMAN	Q9HC21		GRK1	Q15835		P49720				Q9BV94				P49720	Q92503
	HAO1	Q9UJM8		CCR1_HUMAN	P32246		LAMA2_HUMAN	P24043		ORNT2_HUMAN	Q9BXI2		GRK2	P25098		P28070				Q9BZQ6				P28070	Q15437
	HARS	P12081		ACKR2_HUMAN	O00590		LAMA3_HUMAN	Q16787		MCAT_HUMAN	O43772		GRM1	Q13255		P28074				O43854				P28074	Q14242
	HAVCR2	Q8TDQ0		CCR10_HUMAN	P46092		LAMA4_HUMAN	Q16363		ODC_HUMAN	Q9BQT8		GRN	P28799		P28072				P20800				P28072	Q9HC62
	HBA2	P69905		CCR2_HUMAN	P41597		LAMA5_HUMAN	O15230		GHC1_HUMAN	Q9H936		GSN	P06396		Q99436				P25101				Q99436	Q9H4L4
	HBB	P68871		CCR3_HUMAN	P51677		LAMB1_HUMAN	P07942		UCP4_HUMAN	O95847		GSPT1	P15170		P28062				P24530				P28062	P49903
	HBD	P02042		CCRL2_HUMAN	O00421		LAMB2_HUMAN	P55268		MCATL_HUMAN	Q8N8R3		GSR	P00390		P28065				O00418				P28065	Q9H4I8
	HBM	Q6B0K9		CCR6_HUMAN	P51684		LAMB3_HUMAN	Q13751		MPCP_HUMAN	Q00325		GSS	P48637		P17980				P57772				P17980	Q9NRX5
	HBQ1	P09105		CCR9_HUMAN	P51686		LAMC1_HUMAN	P11047		MFTC_HUMAN	Q9H2D1		GSTA1	P08263		P43686				Q7L9B9				P43686	Q96P15
	HBZ	P02008		NOCT_HUMAN	Q9UK39		LAMC2_HUMAN	Q13753		S2539_HUMAN	Q9BZJ4		GSTK1	Q9Y2Q3		P62195				Q8N7B9				P62195	P50452
	HCLS1	P14317		CCS_HUMAN	O14618		LAMC3_HUMAN	Q9Y6N6		ADT1_HUMAN	P12235		GSTM1	P09488		Q99460				Q9BSW2				Q99460	Q9BYW2
	HDAC6	Q9UBN7		TCPB_HUMAN	P78371		LAMP1_HUMAN	P11279		S2542_HUMAN	Q86VD7		GSTO1	P78417		O00231				Q9BUP0				O00231	Q8WTS6
	HDDC2	Q7Z4H3		TCPG_HUMAN	P49368		LAMP2_HUMAN	P13473		S2546_HUMAN	Q96AG3		GSTP1	P09211		O00487				P52797				O00487	Q96T68
	HDDC3	Q8N4P3		TCPD_HUMAN	P50991		LAMP3_HUMAN	Q9UQV4		S2547_HUMAN	Q6Q0C1		GTF2B	Q00403		Q13200				P52798				Q13200	Q7Z333
	HDGF	P51858		TCPE_HUMAN	P48643		LAMP5_HUMAN	Q9UJQ1		ADT2_HUMAN	P05141		GTF2E1	P29083		Q16401				Q15768				Q16401	Q15428
	HDHD2	Q9H0R4		TCPZ_HUMAN	P40227		LTOR2_HUMAN	Q9Y2Q5		S2551_HUMAN	Q9H1U9		GTF2F1	P35269		Q15008				Q9Y2G0				Q15008	Q12874
	HDHD3	Q9BSH5		TCPW_HUMAN	Q92526		LTOR3_HUMAN	Q9UHA4		ADT3_HUMAN	P12236		GTF2I	P78347		O00233				Q9UHF1				O00233	Q15393
	HEATR1	Q9H583		TCPH_HUMAN	Q99832		LTOR5_HUMAN	O43504		S26A1_HUMAN	Q9H2B4		GTSE1	Q9NYZ3		Q06323				Q99944				Q06323	Q15427
	HEBP1	Q9NRV9		TCPQ_HUMAN	P50990		LANC1_HUMAN	O43813		S2611_HUMAN	Q86WA9		GUCA2A	Q02747		P26599				Q63HQ2				P26599	Q9BWJ5
	HEBP2	Q9Y5Z4		CD109_HUMAN	Q6YHK3		LANC2_HUMAN	Q9NS86		S26A2_HUMAN	P50443		GUCA2B	Q16661		P41222				Q9H6Z9				P41222	Q12872
	HECTD3	Q5T447		CD14_HUMAN	P08571		LANC3_HUMAN	Q6ZV70		S26A3_HUMAN	P40879		GUCY1A3	Q02108		Q15185				P11161				Q15185	Q13326
	HEG1	Q9ULI3		C163A_HUMAN	Q86VB7		AMPL_HUMAN	P28838		S26A4_HUMAN	O43511		GUCY1B3	Q02153		Q14914				Q05215				Q14914	Q562F6
	HEMGN	Q9BXL5		MUC24_HUMAN	Q04900		LAPM5_HUMAN	Q13571		S26A5_HUMAN	P58743		GUCY2F	P51841		Q05397				P47813				Q05397	O60880
	HEPACAM2	A8MVW5		CD177_HUMAN	Q8N6Q3		LARG1_HUMAN	O95461		S26A6_HUMAN	Q9BXS9		GULP1	Q9UBP9		Q14289				Q9BQI3				Q14289	P78314
	HEPH	Q9BQS7		CD180_HUMAN	Q99467		LARP1_HUMAN	Q6PKG0		S27A1_HUMAN	Q6PCB7		GUSB	P08236		Q13308				P19525				Q13308	O60239
	HEPHL1	Q6MZM0		CD19_HUMAN	P15391		SYLC_HUMAN	Q9P2J5		S27A2_HUMAN	O14975		GYS1	P13807		P06454				Q9NZJ5				P06454	Q9Y566
	HEXA	P06865		CD1B_HUMAN	P29016		SYLM_HUMAN	Q15031		S28A1_HUMAN	O00337		GZMB	P10144		Q06124				P49770				Q06124	Q9UPX8
	HEXB	P07686		CD2_HUMAN	P06729		LASP1_HUMAN	Q14847		S28A2_HUMAN	O43868		GZMM	P51124		P29350				Q9NR50				P29350	Q92529
	HFE2	Q6ZVN8		OX2G_HUMAN	P41217		LAT_HUMAN	O43561		S29A1_HUMAN	Q99808		H1F0	P07305		P18433				Q9UI10				P18433	Q9UQ13
	HGD	Q93099		MO2R1_HUMAN	Q8TD46		LATS1_HUMAN	O95835		S29A3_HUMAN	Q9BZD2		H1FX	Q92522		P23467				P41214				P23467	Q13796
	HGFAC	Q04756		CD209_HUMAN	Q9NNX6		LATS2_HUMAN	Q9NRM7		GTR1_HUMAN	P11166		H2AFJ	Q9BTM1		P23468				Q14152				P23468	Q8TF72
	HGS	O14964		CD22_HUMAN	P20273		LBP_HUMAN	P18428		GTR10_HUMAN	O95528		H2AFX	P16104		P10586				Q9UBQ5				P10586	P14410
	HHIPL1	Q96JK4		CD226_HUMAN	Q15762		LBR_HUMAN	Q14739		GTR11_HUMAN	Q9BYW1		H2AFY	O75367		P23470				O60573				P23470	Q8IUQ4
	HIBADH	P31937		CD244_HUMAN	Q9BZW8		LBX1_HUMAN	P52954		MYCT_HUMAN	Q96QE2		H2AFZ	P0C0S5		Q12913				Q13541				Q12913	O43255
	HIBCH	Q6NVY1		CD3Z_HUMAN	P20963		LCA5L_HUMAN	O95447		GTR2_HUMAN	P11168		H6PD	O95479		Q15262				O60516				Q15262	Q96RL6
	HINT1	P49773		CD248_HUMAN	Q9HCU0		LCAT_HUMAN	P04180		GTR3_HUMAN	P11169		HAAO	P46952		P28827				Q9H777				P28827	Q9NYZ4
	HINT2	Q9BX68		CD27_HUMAN	P26842		LCE2B_HUMAN	O14633		GTR4_HUMAN	P14672		HABP2	Q14520		Q13332				Q12926				Q13332	P57059
	HIST1H1B	P16401		CD276_HUMAN	Q5ZPR3		LCK_HUMAN	P06239		S2A4R_HUMAN	Q9NR83		HADHA	P40939		P23471				Q14576				P23471	P81133
	HIST1H1C	P16403		CD2AP_HUMAN	Q9Y5K6		LCMT1_HUMAN	Q9UIC8		GTR5_HUMAN	P22732		HAGH	Q16775		Q6NZI2				P26378				Q6NZI2	Q96ST3
[truncated: 4,486 more rows]

## Sheet: Table 9
	Housekeeping coding-protein genes datasets
[truncated: 7,585 more rows]

## Sheet: Table 10
	Venn Diagrams Datasets: "Minimal strategy"
[truncated: 7,583 more rows]

[truncated: 3 more sheets: Table 11, Table 12, Table 13]
